# Supplementary material for: Physiological, Epigenetic, and Transcriptome Analyses Provide Insights into the Responses of Wheat Seedling Leaves to Different Water Depths under Flooding Conditions
Source: Int J Mol Sci. 2023 Nov 26;24(23):16785. doi: 10.3390/ijms242316785 (PMC10706670; doi:10.3390/ijms242316785)
Supplement: Supplementary file 1 [file ijms-24-16785-s001.zip › Supplemental figures.pdf]

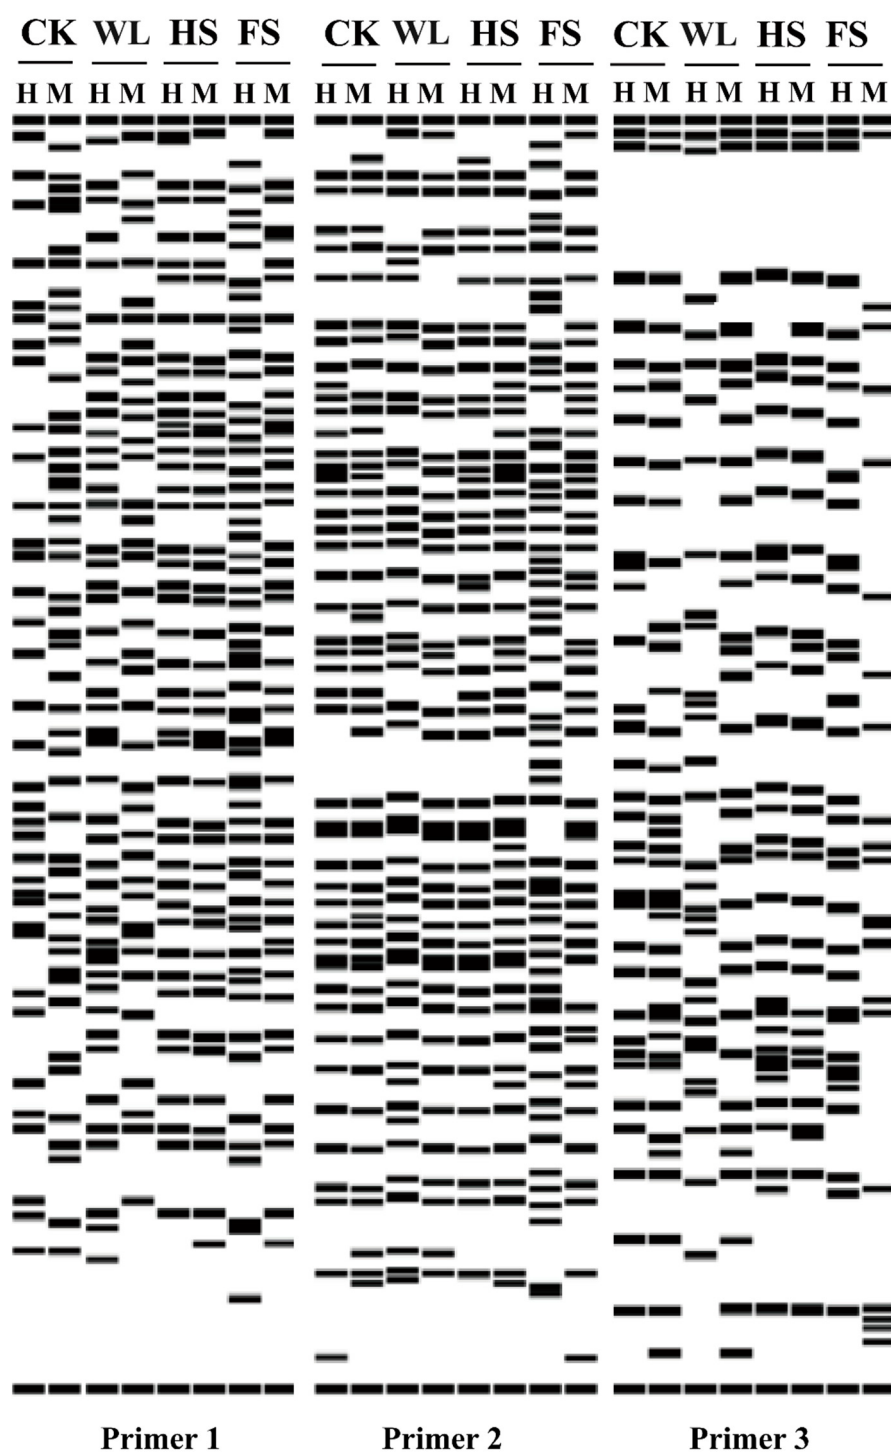

**Figure S1.** Partial MSAP bands monitored by capillary gel electrophoresis. H and M represent genomic DNA sample digested by *EcoRI* / *HpaII* and *EcoRI* / *MspI* combinations, respectively. MSAP markers generated with the selected primer combinations of *HpaII/MspI* + CTG / *EcoRI* + GTT (primer combination 1), *HpaII/MspI* + CTG / *EcoRI* + AAC (primer combination 2) and *HpaII/MspI* + TCCA / *EcoRI* + TA (primer combination 3).

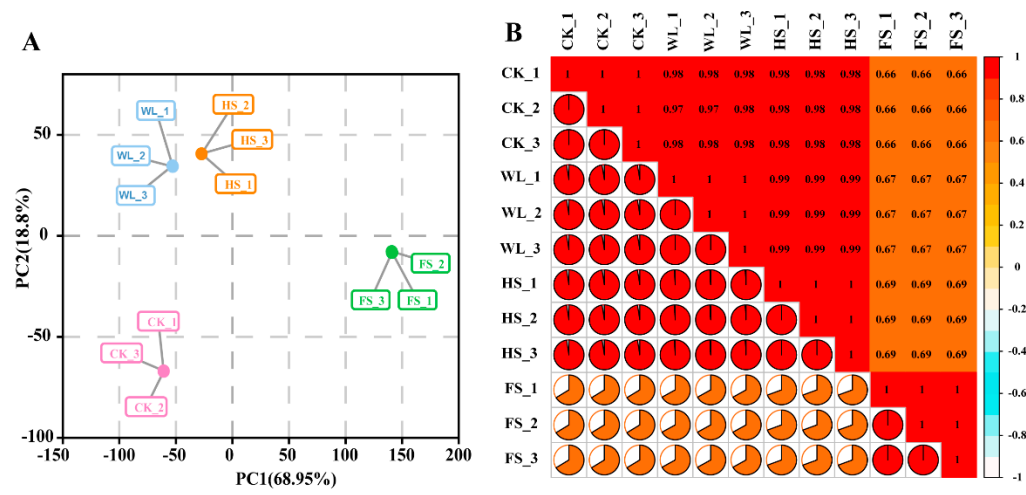

**Figure S2.** Principal component (A) and correlation analysis between biological replicates (B).

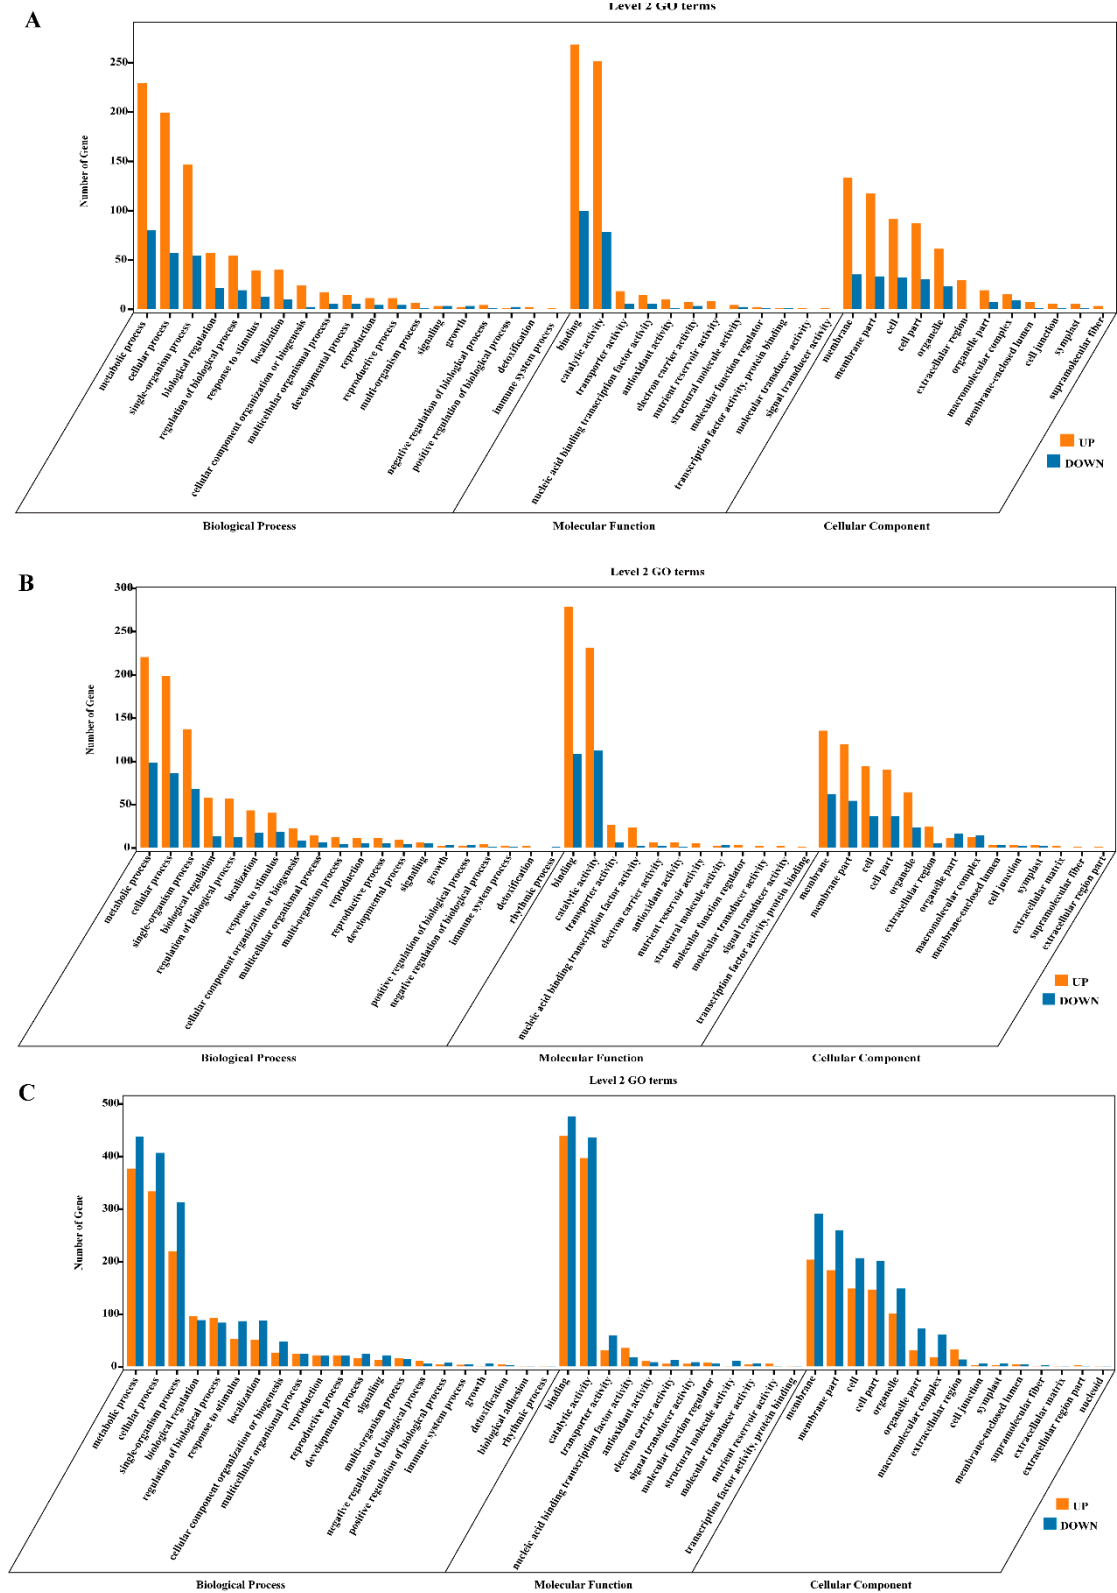

**Figure S3** GO classification analysis of DEGs induced by WL (A), HS (B) and FS (C) treatment.
