# Supplementary material for: Physiological, Epigenetic, and Transcriptome Analyses Provide Insights into the Responses of Wheat Seedling Leaves to Different Water Depths under Flooding Conditions
Source: Int J Mol Sci. 2023 Nov 26;24(23):16785. doi: 10.3390/ijms242316785 (PMC10706670; doi:10.3390/ijms242316785)
Supplement: Supplementary file 1 [file ijms-24-16785-s001.zip › Supplemental tables.xlsx]

## Sheet: Table S1
Table S1. Summary of sequencing data quality
Sample	Raw Reads	Clean Reads	Clean_bases (Gb)	Q20(%)	Q30(%)	GC(%)	Unique MappingRatio(%)
CK_1	88736020	85630140	12.84	97.86	93.75	56.74	0.8536
CK_2	88724534	85617820	12.74	97.86	93.75	56.74	0.8536
CK_3	88730650	85625578	12.84	97.86	93.75	56.74	0.8531
WL_1	91749848	86379674	12.96	97.63	93.38	57.54	0.8746
WL_2	91741154	86373802	12.96	97.63	93.39	57.54	0.8744
WL_3	91744018	86372230	12.96	97.63	93.38	57.55	0.8745
HS_1	85033776	79947842	11.99	97.82	93.73	58.02	0.8441
HS_2	85022506	79941272	11.99	97.82	93.73	58.02	0.8442
HS_3	85028006	79941130	11.99	97.82	93.73	58.02	0.8441
FS_1	81022174	75648972	11.35	97.73	93.53	55.7	0.8175
FS_2	81012050	75638768	11.35	97.73	93.53	55.7	0.8175
FS_3	81015030	75639994	11.35	97.73	93.53	55.7	0.8178
Average	8.663e+07	8.18964e+07	12.2767	97.76	93.5983	57.0008	0.847417

## Sheet: Table S2
Table S2. The all genes detected in this study
ID	WL/CK		HS/CK		FS/CK		FPKM
	log2FoldChange	padj	log2FoldChange	padj	log2FoldChange	padj	CK_1	CK_2	CK_3	WL_1	WL_2	WL_3	HS_1	HS_2	HS_3	FS_1	FS_2	FS_3
TraesCS4D02G135000	-0.271	0	-0.227	0	-1.411	0	5635.36	5593.01	5645.24	5172.74	5182.55	5169.91	5569.57	5574.12	5553.63	3066.98	3074.79	3062.78
TraesCS4A02G177500	-0.326	0	-0.302	0	-1.56	0	5797.9	5791.19	5815.35	5163.94	5122.82	5126.22	5440.3	5469	5439.63	2858.39	2849.74	2858.34
TraesCS4B02G140300	-0.281	0	-0.222	0	-1.412	0	4918.91	4917.8	4932.79	4528.54	4487.18	4478.92	4885.44	4890	4885.92	2673.46	2688.84	2692.77
TraesCS5B02G162800	-0.275	0	-0.256	0	-1.698	0	7052.21	7052.98	7038.34	6482.96	6464.38	6452.7	6837.41	6824.62	6843.62	3156.49	3158.6	3143.79
TraesCS5D02G169900	-0.36	0	-0.395	0	-1.969	0	9347.48	9258.02	9252.85	8027.63	8041.5	8026.38	8178.76	8175.89	8179.25	3438.71	3437.07	3447.47
TraesCS5B02G162600	-0.313	0	-0.331	0	-1.608	0	6569.29	6608.99	6590.16	5889.55	5896.49	5876.77	6032.52	6083.59	6088.29	3136.19	3127.88	3149.46
TraesCS5D02G169600	-0.369	0	-0.442	0	-1.744	0	7127.93	7129.66	7134.09	6128.54	6131.54	6121.34	6068.22	6059.88	6105.23	3088.43	3090.46	3089.12
TraesCS7D02G276300	-0.435	0	-0.354	0	-1.77	0	4420.89	4411.88	4403.37	3628.49	3617.66	3625	4005.24	4001.57	3988.58	1877.79	1873.95	1880.9
TraesCS5D02G329200	-0.607	0	-0.787	0	-3.597	0	4313.21	4327.95	4337.54	3158.89	3156.02	3147.32	2895.28	2913.08	2900.24	520.761	517.578	518.498
TraesCS3A02G230000	-0.761	0	-0.8	0	-3.555	0	3396.96	3439.43	3427.85	2234.22	2243.4	2245.76	2288.79	2280.91	2258.09	420.55	425.837	420.889
TraesCS2A02G344600	-0.235	0	-0.436	0	-1.852	0	3059.72	3069.11	3070.14	2885.66	2892.78	2897.04	2633.55	2620.73	2619.28	1230.35	1228.41	1238
TraesCS3D02G223300	-0.829	0	-0.91	0	-3.871	0	3563.55	3677.9	3601.02	2250.3	2237.75	2288.96	2222.72	2237.25	2224.51	358.442	358.649	358.009
TraesCS2A02G247300	-0.369	0	-0.48	0	-1.629	0	2061.91	2070.67	2060.49	1774.06	1773.39	1775.49	1710.36	1710.94	1720.15	966.728	969.691	969.178
TraesCS4D02G319400	-0.247	0	-0.286	0	-2.181	0	1584.51	1581.07	1573.46	1471.5	1482.97	1479.58	1497.88	1503.69	1500.95	504.967	506.19	505.667
TraesCS2B02G342200	-0.251	0	-0.458	0	-1.86	0	1945.09	1941.27	1929.85	1806.52	1805.26	1812.32	1638.05	1638.36	1626.26	776.127	774.188	774.724
TraesCS7A02G276400	-0.471	0	-0.548	0	-2.692	0	3264.25	3255.55	3263.08	2606.79	2620.71	2605.8	2585.88	2589.22	2574.22	734.678	729.583	731.984
TraesCS5A02G322500	-0.461	0	-0.764	0	-3.346	0	2518.09	2518.6	2526.45	2019.02	2046.51	2035.3	1715.23	1723.06	1719.57	357.782	360.344	361.324
TraesCS3B02G259300	-0.787	0	-0.784	0	-3.484	0	2437.9	2495.68	2423.29	1588.89	1562.56	1582.99	1651.98	1654.95	1640.98	316.346	319.89	317.729
TraesCS2D02G248400	-0.466	0	-0.548	0	-1.512	0	2359.12	2354.68	2350	1889.09	1890.12	1895.84	1863.15	1861.96	1868.54	1201.6	1195.71	1197.12
TraesCS2B02G270300	-0.42	0	-0.552	0	-1.654	0	1239.38	1242.5	1242.55	1024.95	1033.22	1031.42	983.231	976.902	982.693	575.508	571.078	570.155
TraesCS4A02G206400	-0.307	0	-0.358	0	-1.947	0	1283.05	1284.24	1291.44	1151.85	1154.68	1156.21	1163.05	1163.1	1161.6	485.547	482.885	483.715
TraesCS7D02G000300	-0.409	0	-0.435	0	-1.999	0	2866.75	2864.09	2874.12	2400.48	2401.7	2394.05	2454.14	2460.59	2454.49	1043.65	1034.4	1046.25
TraesCS2B02G240000	-0.709	0	-0.734	0	-1.972	0	2958.64	2955.33	2974.36	2007.1	2010.25	2016.98	2063.69	2065.07	2059.23	1096.09	1101.79	1089.08
TraesCS7A02G000400	-0.331	0	-0.353	0	-1.874	0	3088.11	3093.76	3091.35	2728.62	2726.9	2725.81	2807.78	2802.51	2796.32	1223.95	1223.31	1224.1
TraesCS4A02G246100	-0.661	0	-0.512	0	-1.492	0	1221.47	1220.22	1232.24	860.712	857.564	861.779	994.296	995.49	994.786	633.436	629.919	632.263
TraesCS2D02G255100	-0.473	0	-0.535	0	-1.859	0	1955.19	1971.51	1952.32	1572.73	1565.42	1565.03	1571.79	1563.92	1562.16	785.937	781.27	784.902
TraesCS2D02G065200	-0.451	0	-0.497	0	-2.206	0	2229.38	2219.98	2236.57	1812.22	1813.25	1803.05	1856.91	1827.55	1801.08	713.56	697.096	692.445
TraesCS4D02G107400	-0.268	0	-0.359	0	-1.907	0	1146.17	1139.21	1146.99	1054.66	1054.94	1053.67	1029.25	1034.84	1035.05	442.319	441.815	444.067
TraesCS5A02G108000	-0.449	0	-0.318	0	-2.2	0	1093.17	1092.51	1095.44	890.556	886.797	890.028	1018.43	1012.31	1018.34	344.812	343.988	347.391
TraesCS4B02G323000	-0.46	0	-0.659	0	-2.417	0	1129.64	1144.54	1145.79	919.847	922.582	918.025	836.326	836.084	836.586	308.862	311.387	309.264
TraesCS7A02G227100	-0.457	0	-0.667	0	-2.432	0	1886.64	1888.69	1905.02	1538.29	1526.28	1527.64	1388.37	1380.5	1373.17	510.713	508.707	508.046
TraesCS2D02G132900	-0.313	0	-0.597	0	-2.161	0	424.271	422.977	422.866	377.667	379.354	377.802	325.024	323.544	323.868	137.667	137.641	136.847
TraesCS5B02G426500	-0.603	0	-0.485	0	-1.103	0	1206.86	1206.12	1202.98	881.759	877.746	883.614	994.204	998.047	998.977	819.922	810.136	811.973
TraesCS3B02G279700	-0.375	0	-0.176	3.94e-119	-1.217	0	363.541	363.144	365.54	312.008	312.124	310.95	374.093	372.749	373.125	229.551	225.46	226.893
TraesCS2B02G267500	-0.357	0	-0.505	0	-1.716	0	1685.33	1686.09	1683.35	1451.92	1476.62	1452.16	1371.38	1380.04	1373.3	744.686	745.22	742.688
TraesCS4B02G089500	-0.529	0	-0.845	0	-2.961	0	1955.98	1951.88	1965.46	1505.35	1501.66	1512.31	1266.28	1262.68	1257.07	363.638	365.05	366.013
TraesCS2A02G130600	-0.353	0	-0.67	0	-2.133	0	369.1	369.684	369.255	321.023	320.871	321.05	267.606	269.803	269.182	122.143	121.982	122.316
TraesCS3D02G250600	-0.506	0	-0.381	0	-1.592	0	557.664	553.834	555.205	434.197	435.783	433.246	493.464	495.207	493.662	266.874	266.68	268.715
TraesCS6D02G340700	-0.655	0	-0.492	0	-1.561	0	1365.54	1374.73	1385.17	964.169	966.033	977.51	1132.95	1133.38	1130.27	674.5	676.762	678.043
TraesCS2B02G152900	-0.354	0	-0.617	0	-2.164	0	376.386	376.412	376.449	327.129	326.564	327.412	285.06	284.093	283.563	121.698	122.324	121.74
TraesCS2A02G206200	-0.718	0	-1.016	0	-3.032	0	1900.13	1897.62	1889.93	1276.72	1277.41	1284.37	1090.19	1085.58	1081.62	340.126	332.901	336.331
TraesCS3A02G250200	-0.5	0	-0.342	0	-1.306	0	434.975	432.206	433.184	340.857	339.647	340.479	395.454	395.783	396.603	252.918	255.282	254.773
TraesCS6B02G390600	-0.542	0	-0.422	0	-1.59	0	1955.15	1948.88	1948.63	1489.84	1489.31	1484.45	1677.73	1703.99	1678.99	941.897	939.534	939.768
TraesCS3B02G061700	-0.495	0	-0.461	0	-2.04	0	1580.6	1587.39	1588.01	1246.96	1249.34	1249.35	1335.49	1332.12	1333.79	556.614	562.28	559.625
TraesCS6B02G294700	-0.459	0	-0.474	0	-2.097	0	1012.74	1007.86	1011.12	817.881	814.481	815.375	842.023	845.162	841.003	341.805	343.755	342.791
TraesCS4D02G086400	-0.519	0	-0.879	0	-2.845	0	1588.81	1564.84	1569.46	1219.07	1219.75	1218.86	992.283	990.073	992.28	315.302	319.295	318.989
TraesCS3D02G051800	-0.499	0	-0.456	0	-1.667	0	1668.7	1660.13	1663.98	1312.4	1303.9	1305.45	1406.51	1401.2	1406.83	756.3	760.289	764.188
TraesCS2D02G209900	-0.734	0	-1.05	0	-2.976	0	1620.87	1611.61	1620.62	1079.4	1081.25	1078.39	907.606	901.589	904.669	297.929	299.492	297.835
TraesCS7D02G227300	-0.394	0	-0.632	0	-2.691	0	1509.9	1503.23	1504.17	1273.69	1265.13	1276.99	1123.57	1125.76	1126.67	337.712	339.755	337.405
TraesCS6D02G247400	-0.51	0	-0.616	0	-2.01	0	1039.21	1044.45	1041.68	810.775	814.622	810.268	782.587	785.254	793.135	376.84	375.808	373.457
TraesCS2A02G254600	-0.462	0	-0.601	0	-1.819	0	2206.03	2206.75	2224.03	1795.67	1772.63	1781.76	1688.23	1679.88	1698.97	912.485	908.912	908.35
TraesCS4A02G226900	-0.542	0	-0.951	0	-2.964	0	1672.72	1682.51	1698.75	1286.59	1280.84	1285.96	996.091	1012.51	1018.54	314.537	312.097	313.05
TraesCS5A02G229300	-0.271	0	-0.621	0	-2.549	0	1311.7	1314.73	1319.37	1209.71	1207.74	1211.87	988.605	990.824	992.812	327.295	324.313	326.634
TraesCS1A02G403300	-0.28	0	-0.552	0	-2.064	0	2024.38	2013.59	2015.66	1839.27	1852.15	1843.05	1597.55	1593.56	1589.92	701.494	698.95	700.757
TraesCS6A02G267300	-0.405	0	-0.422	0	-1.685	0	880.171	877.484	877.99	737.74	738.395	733.05	757.191	760.077	760.271	395.943	400.918	392.946
TraesCS2B02G079200	-0.468	0	-0.548	0	-2.427	0	1647.54	1638.56	1677.55	1331.21	1319.54	1332.95	1318.61	1301.82	1312.05	443.352	447.631	448.453
TraesCS5D02G432900	-0.656	0	-0.562	0	-1.402	0	1011.33	1010.41	1015.46	709.067	719.589	710.968	793.643	792.523	796.64	556.737	558.679	552.486
TraesCS5D02G238300	-0.497	0	-0.638	0	-2.583	0	1457.29	1458.04	1464.15	1140.26	1151.11	1152.48	1088.92	1087.53	1083.41	352.263	356.172	352.367
TraesCS6D02G152700	-0.407	0	-0.586	0	-2.526	0	1356.89	1360.46	1352.42	1131.77	1135.1	1139.63	1051.48	1042.16	1045.44	340.84	342.036	342.478
TraesCS2B02G233400	-0.742	0	-1.145	0	-3.415	0	1310.69	1311.24	1310.87	869.996	869.772	870.696	683.084	690.004	686.463	176.427	180.599	177.866
TraesCS5B02G115300	-0.39	0	-0.227	5.82e-156	-2.034	0	716.567	713.71	717.394	607.28	603.642	607.986	708.964	706.406	710.267	252.981	252.672	255.411
TraesCS6A02G358100	-0.602	0	-0.48	0	-1.476	0	1572.24	1575.94	1567.25	1154.25	1137.52	1157.6	1304.07	1305.83	1304.5	822.508	821.765	815.577
TraesCS5A02G424400	-0.549	0	-0.659	0	-1.669	0	1029.06	1024.25	1016.69	775.128	777.181	776.564	749.353	747.905	753.741	463.481	466.934	470.553
TraesCS2B02G264100	-0.538	0	-0.371	0	-1.429	0	844.209	836.697	847.417	644.58	645.694	642.967	756.949	755.036	752.77	453.239	453.845	455.75
TraesCS2B02G340300	-0.365	0	-0.672	0	-3.053	0	1208.28	1209.3	1203.29	1040.68	1039.96	1039.44	878.711	879.529	873.763	210.323	210.979	211.952
TraesCS5D02G357600	-0.369	0	-0.982	0	-3.303	0	2340.09	2330.72	2352.01	2003.05	2019.87	2012.85	1379.09	1373.91	1363.95	344.828	342.088	345.344
TraesCS1B02G432700	-0.347	0	-0.5	0	-2.209	0	1164.25	1161.64	1157.43	1011.05	1011.74	1017.15	951.218	953.885	948.276	364.989	364.495	363.426
TraesCS4D02G068100	-0.57	0	-0.585	0	-1.741	0	618.764	623.537	618.266	465.396	463.142	462.767	477.017	479.44	480.415	267.29	270.745	269.843
TraesCS2A02G261600	-0.652	0	-0.545	0	-1.599	0	602.211	607.182	605.786	427.792	427.22	427.328	480.193	481.884	478.848	287.869	291.421	290.069
TraesCS6D02G012200	-0.449	0	-0.343	1.46e-295	-1.453	0	707.954	705.925	705.387	572.744	578.774	571.578	644.286	641.748	649.559	375.644	372.873	375.041
TraesCS2A02G252600	-0.495	0	-0.671	0	-2.729	0	1643.29	1649.81	1649	1295.13	1295.85	1302.69	1195.09	1194.12	1205.27	358.057	369.328	354.452
TraesCS7A02G071100	-0.377	0	-0.75	0	-2.028	0	541.005	541.015	543.565	462.991	463.598	462.818	371.583	374.408	373.431	193.469	192.764	192.018
TraesCS7B02G148000	-0.577	0	-0.375	0	-1.308	0	644.554	647.482	646.315	480.674	480.842	480.926	580.957	574.705	574.978	377.177	377.954	381.019
TraesCS6A02G159800	-0.519	0	-0.702	0	-2.352	0	1001.5	1003.4	998.508	770.95	775.444	779.734	712.128	712.934	713.323	286.199	283.966	283.708
TraesCS2B02G234500	-0.534	0	-0.444	0	-1.684	0	852.738	863.342	863.606	659.029	657.218	660.888	733	733.071	730.301	389.435	385.333	390.075
TraesCS6B02G191500	-0.582	0	-0.841	0	-2.556	0	1862.93	1822.51	1854.41	1361.87	1373.97	1372.82	1196.16	1195.35	1191.01	453.257	453.948	459.332
TraesCS2D02G262400	-0.651	0	-0.542	0	-1.677	0	529.313	527.793	532.995	374.599	374.605	374.765	418.471	421.896	424.452	240.91	239.505	241.091
TraesCS2B02G130300	1.023	0	0.87	0	-0.634	0	436.002	430.879	430.789	975.183	980.684	972.442	917.752	916.273	913.488	405.669	401.015	406.351
TraesCS2A02G111300	2.869	0	2.705	0	0.455	5.2e-129	158.638	158.579	158.788	1289.5	1283.04	1287.79	1199.78	1201.95	1191.93	317.453	312.654	316.67
TraesCS2B02G280600	-0.603	0	-0.543	0	-1.63	0	555.094	555.515	547.907	406.111	403.65	401.975	439.285	440.978	438.223	258.827	260.013	258.464
TraesCS5B02G417400	-0.687	0	-0.92	0	-1.827	0	1278.52	1278.27	1273.01	877.317	883.244	880.206	777.697	780.6	786.237	520.735	522.599	522.671
TraesCS2B02G118900	-0.414	0	-0.198	9.46e-92	-1.809	0	1355.48	1360.37	1364.65	1137.53	1130.88	1131.01	1371.96	1379.39	1366.99	563.168	561.853	565.026
TraesCS7B02G278200	-0.458	0	-0.719	0	-3.9	0	825.762	824.967	825.008	667.116	664.939	668.332	579.607	583.906	577.81	81.128	81.0601	78.4889
TraesCS7A02G325400	0.85	0	0.787	0	-1.236	0	506.191	505.462	507.199	1013.24	1018.66	1006.92	1008.9	1016.58	1010.63	310.5	312.083	313.299
TraesCS4B02G069300	-0.487	0	-0.471	0	-1.549	0	566.291	563.623	566.954	449.064	447.274	447.794	472.431	473.584	471.729	281.275	280.367	279.956
TraesCS7D02G322000	1.129	0	0.987	0	-1.246	0	410.201	407.643	412.51	996.414	997.533	994.124	945.16	939	940.213	250.481	251.9	250.464
TraesCS2D02G112000	2.421	0	2.284	0	0.449	3.07e-148	199.935	199.41	202.336	1196.54	1187.21	1193.82	1127.44	1132.63	1134.34	395.149	397.923	398.754
TraesCS5D02G122700	-0.386	0	-0.248	1.44e-131	-1.863	0	499.674	501.876	502.005	427.33	423.043	427.307	489.879	486.279	490	200.144	199.307	200.229
TraesCS6A02G086300	3.411	0	3.291	0	0.203	1.15e-15	95.7964	98.5345	98.8996	1151.28	1156.86	1154.95	1110.42	1106.56	1107.3	162.447	164.406	162.974
TraesCS7A02G020500	-0.42	0	-0.443	0	-2.694	0	652.392	652.896	649.76	534.978	543.349	543.902	555.261	552.62	558.214	147.041	144.965	146.547
TraesCS7A02G381100	-0.597	0	-0.348	2.59e-240	-1.695	0	519.979	516.739	519.253	380.375	381.363	380.018	468.875	471.34	475.738	235.068	232.066	230.299
TraesCSU02G077300	2.844	0	2.702	0	0.416	6.64e-90	150.766	152.891	152.925	1215.71	1209.24	1214.77	1153.81	1150.12	1137.13	295.055	295.536	293.525
TraesCS2B02G312600	-0.41	0	-0.579	0	-2.011	0	2396.91	2402.1	2407.21	2011.65	2005.82	2002.26	1856.41	1868.98	1862.21	858.523	866.751	868.44
TraesCS2D02G214700	-0.527	0	-0.465	0	-1.546	0	717.543	720.818	723.552	558.347	557.807	549.269	596.621	609.793	607.951	358.374	356.736	359.095
TraesCS7D02G377400	-0.633	0	-0.36	6.8e-283	-1.786	0	588.267	585.158	584.18	419.713	419.071	419.693	528.935	529.01	528.213	248.091	245.672	245.548
TraesCS2A02G114400	1.557	0	1.391	0	-0.427	2.39e-151	311.027	316.064	316.76	1027.01	1031.84	1024.9	951.529	964.054	951.905	340.168	340.006	338.217
TraesCS2A02G250800	-0.521	0	-0.356	2e-277	-1.211	0	560.256	562.609	561.796	432.682	434.861	435.72	509.392	505.916	509.477	352.535	350.068	353.603
TraesCS2A02G035100	1.304	0	1.611	0	-0.27	4.35e-57	257.723	257.522	257.179	703.16	703.367	710.403	911.673	907.088	912.985	310.032	309.918	309.52
TraesCS7B02G226100	0.679	0	0.557	0	-1.252	0	445.241	439.741	443.258	782.405	787.795	790.55	753.993	756.233	753.304	271.801	271.107	266.327
TraesCS2B02G048200	-1.189	0	-0.828	0	-2.117	0	1597.16	1596.11	1597.23	774.097	778.848	779.441	1045.51	1041.25	1037.61	536.355	532.83	533.064
TraesCS5D02G422800	-0.777	0	-1.031	0	-2.144	0	1906.87	1913.81	1911.91	1239.16	1240.15	1233.29	1080.33	1076.64	1092.21	631.991	622.569	627.92
TraesCS2D02G115200	1.545	0	1.362	0	-0.828	0	574.178	575.254	571.376	1880.67	1849.61	1844.48	1716.45	1710.18	1696.86	469.739	470.797	466.058
TraesCS4B02G325800	-0.718	0	-0.551	0	-0.988	0	459.462	461.112	459.389	310.629	310.784	310.076	363.617	363.394	364.094	336.202	337.911	335.286
TraesCS2B02G133500	1.243	0	1.188	0	-0.43	3.08e-175	292.291	290.284	289.72	766.532	762.636	762.664	768.796	765.537	767.717	315.163	313.747	310.904
TraesCS6D02G001700	-0.529	0	-0.449	0	-1.787	0	756.833	762.141	761.628	586.587	585.747	582.008	643.584	645.891	645.63	319.554	320.626	318.558
TraesCS6B02G115900	3.726	0	3.593	0	0.424	1.7e-50	73.6403	75.3051	76.0069	1102.48	1098.29	1102.9	1046.04	1050.6	1047.99	143.978	146.105	147.914
TraesCS2A02G223600	-0.607	0	-0.612	0	-2.282	0	902.933	908.637	902.19	656.793	656.459	664.227	681.257	687.222	687.802	268.84	267.073	273.886
TraesCS7B02G283000	-0.59	0	-0.224	4.95e-94	-1.721	0	477.591	474.945	474.262	351.615	351.508	349.453	470.079	472.339	471.955	209.834	208.961	209.197
TraesCS2B02G273900	-0.537	0	-0.544	0	-2.23	0	574.821	578.894	581.81	442.657	445.828	439.033	459.564	459.724	458.905	180.411	178.008	178.412
TraesCS2D02G251800	-0.617	0	-0.323	2.83e-169	-1.627	0	432.952	430.743	432.407	314.414	311.15	312.423	399.991	397.121	402.909	205.882	202.09	200.81
TraesCS5A02G256900	1.398	0	1.012	0	-1.255	0	689.065	683.198	681.953	1994.33	2012.28	2003.36	1600.16	1612.13	1585.51	420.148	417.969	410.451
TraesCS3B02G096500	-0.672	0	-0.245	4.49e-103	-0.301	1.63e-158	1982.51	1988.41	1994.5	1396.89	1369.99	1389.88	1945.8	1945.99	1938.22	2362.45	2335.85	2330.2
TraesCS6B02G432300	-1.161	0	-0.917	0	-0.988	0	824.626	827.868	829.132	411.013	409.053	412.266	509.072	509.015	504.276	605.28	608.353	601.813
TraesCS6A02G382400	-0.807	0	-0.474	5.65e-273	-1.746	0	543.081	548.749	538.024	341.229	341.847	351.289	452.496	451.91	454.152	235.174	235.088	234.942
TraesCS2B02G555400	-1.801	0	-1.339	0	-6.302	0	296.029	293.556	296.368	93.9425	94.0602	94.2016	134.384	135.52	135.554	5.67447	5.39539	5.22004
TraesCS5D02G118700	-0.457	0	-0.196	1.21e-68	0.231	4.81e-106	207.42	207.419	205.929	167.723	168.128	166.159	209.674	208.885	208.821	351.094	352.572	353.36
TraesCS1B02G388700	-2.21	0	-2.823	0	-9.081	0	837.196	841.369	840.091	201.438	202.177	200.848	137.309	137.284	137.74	2.25893	2.37343	2.11743
TraesCS5B02G322900	-0.436	0	-0.736	0	-3.368	0	755.629	750.441	754.743	616.342	620.539	618.303	525.54	523.817	522.843	107.214	106.58	104.018
TraesCS3B02G344200	0.999	0	0.913	0	-0.645	0	321.585	324.303	320.978	717.56	716.838	710.104	703.557	701.975	702.24	299.858	298.071	299.055
TraesCS2D02G229600	-0.594	0	-0.628	0	-2.119	0	492.215	487.113	488.12	359.743	360.794	358.949	364.51	366.844	368.27	162.679	164.527	163.017
TraesCS1D02G149800	-1.18	0	-0.248	1.72e-81	-5.363	0	587.265	591.542	582.92	289.259	286.922	286.687	573.126	572.75	572.006	20.1613	20.1633	21.8013
TraesCS5D02G013400	-1.858	0	-1.77	0	-8.46	0	579.16	578.38	577.808	176.979	177.66	176.831	195.124	197.695	196.284	2.50748	2.37978	2.26349
TraesCS1D02G375700	-2.011	0	-2.57	0	-5.265	0	1477.8	1480.29	1313.26	393.749	393.986	388.816	269.986	294.78	267.994	53.9732	54.1573	53.0045
TraesCS2A02G207900	-0.561	0	-0.53	0	-1.655	0	438.366	440.46	435.603	328.182	329.141	331.733	348.963	351.723	353.375	201.377	201.767	202.381
TraesCS5A02G498000	-0.536	0	-0.528	0	-1.245	0	349.529	348.06	348.027	267.856	265.684	266.971	278.607	279.733	281.342	213.896	213.448	212.946
TraesCS6D02G378000	-0.828	0	-0.392	1.91e-257	-0.282	6.07e-142	439.971	439.995	438.706	273.965	273.532	276.911	386.941	389.862	386.946	522.979	527.616	522.847
TraesCS7B02G373000	-0.708	0	-0.543	0	-1.118	0	252.188	252.189	255.037	172.201	172.261	171.704	201.414	201.67	200.364	168.835	169.683	169.345
TraesCS5B02G466700	1.213	0	1.033	0	-1.917	0	221.55	221.551	222.747	571.774	568.717	573.048	529.342	522.992	525.778	86.1377	84.2916	85.3928
TraesCS4B02G348600	-1.562	0	-1.379	0	-4.431	0	515.209	519.021	518.238	194.321	194.142	195.03	230.212	229.284	231.593	34.5597	34.736	35.1332
TraesCS4D02G343000	-1.889	0	-1.466	0	-6.515	0	524.929	522.505	524.764	158.384	155.941	156.834	219.686	220.207	219.141	8.25005	8.26846	8.42254
TraesCS3B02G181300	-0.539	0	-0.916	0	-6.7	0	535.672	532.235	533.271	408.112	407.279	407.559	327.296	329.272	326.443	7.35421	7.43518	7.56508
TraesCS2D02G528500	-1.813	0	-1.596	0	-7.308	0	407.283	407.103	407.509	128.569	128.665	128.764	155.548	155.315	157.129	3.67971	3.6164	3.89458
TraesCS3A02G377600	-0.591	0	-0.52	0	-2.712	0	380.088	379.54	380.035	277.988	281.393	280.385	308.095	306.871	305.587	83.2996	85.2283	83.8467
TraesCS7D02G458400	-0.531	0	-0.331	1.47e-152	-0.841	0	213.548	214.472	215.315	164.22	164.873	165.065	198.12	196.823	197.412	174.515	172.623	174.069
TraesCS4D02G357100	-0.617	0	-0.607	0	-5.704	0	458.823	462.817	461.531	332.944	334.896	333.328	349.687	350.541	351.276	12.4617	13.2148	12.8324
TraesCS7A02G314100	0.721	0	0.615	0	-0.958	0	220.174	219.671	219.868	402.165	402.537	402.14	389.36	391.785	389.389	165.596	163.179	163.875
TraesCS2A02G075000	1.408	0	0.681	0	-4.14	0	194.047	192.285	194.155	569.451	570.387	570.629	358.458	360.358	358.951	15.8701	15.5623	16.3584
TraesCS5D02G265500	1.667	0	1.415	0	-1.399	0	192.038	194.162	191.121	677.165	680.165	677.926	595.124	590.459	597.647	106.817	104.77	106.088
TraesCS2A02G525500	-2.113	0	-2.05	0	-6.078	0	523.398	521.403	520.937	132.721	135.005	134.188	146.458	144.698	146.734	11.0333	11.2684	11.3276
TraesCS3A02G081300	-0.778	0	-0.484	6.89e-282	-0.564	0	1205.34	1209.1	1221.22	785.037	785.452	782.789	991.564	1006.06	1013.16	1185.98	1196.07	1186.29
TraesCS5B02G208100	-0.67	0	-0.246	2.08e-71	-1.354	0	280.342	278.255	278.667	195.012	193.699	195.412	273.759	271.308	272.736	157.853	158.31	159.234
TraesCS2B02G090300	1.099	0	0.416	3.8e-163	-4.65	0	443.91	448.878	450.368	1067.12	1061.75	1064.15	692.015	687.336	695.529	25.8869	24.8817	26.8838
TraesCS5A02G007900	-1.86	0	-1.942	0	-9.666	0	451.679	451.331	453.149	138.963	138.14	137.587	136.314	135.936	136.626	0.820349	0.896163	0.706476
TraesCS6B02G421800	-0.53	0	-0.229	2.4e-62	-1.355	0	328.493	330.016	328.118	253.08	251.995	253.648	324.181	325.256	325.489	185.64	187.499	186.56
TraesCS5D02G468400	1.58	0	1.605	0	-1.816	0	121.356	120.846	122.562	405.599	399.916	404.943	428.175	428.924	427.853	50.2596	50.3843	49.6412
TraesCS4D02G322700	-1.105	0	-0.901	0	-0.918	0	323.891	325.25	323.91	167.757	166.754	167.561	201.893	200.71	200.839	248.853	250.479	248.074
TraesCS3B02G578200	1.245	0	2.16	0	-0.335	3.68e-34	64.6682	66.6389	65.6139	171.715	172.919	173.563	337.539	341.376	340.516	76.877	75.2196	74.4774
TraesCS3D02G116400	-0.778	0	-0.375	3.72e-190	1.536	0	161.779	161.327	161.997	104.587	104.281	105.082	145.021	143.415	144.841	678.108	681.514	681.127
TraesCS6A02G405600	-0.618	0	-0.119	7.22e-16	-0.901	0	282.478	283.956	283.167	204.539	204.943	205.113	300.814	301.956	303.274	220.092	218.859	221.317
TraesCS3B02G410400	-0.631	0	-0.486	2.18e-250	-3.179	0	287.227	289.004	286.761	205.535	205.924	206.97	236.936	236.333	240.334	46.1788	45.5949	46.4659
TraesCSU02G049400	-1.337	0	-1.009	0	-1.443	0	802.599	803.807	799.308	353.333	347.879	356.026	463.15	460.911	460.319	427.262	429.647	426.995
TraesCS6D02G066700	-0.854	0	-0.625	0	-1.532	0	517.696	518.463	518.12	316.353	319.166	318.873	391.352	386.972	388.951	262.585	258.25	259.074
TraesCS5B02G006500	-1.853	0	-1.816	0	-9.557	0	358.71	356.489	356.721	108.994	109.655	110.681	118.346	116.975	117.299	0.646293	0.62101	0.798038
TraesCS5D02G027600	0.569	0	0.107	2.23e-11	0.53	3.62e-288	192.892	195.464	194.188	318.178	323.33	318.074	240.514	244.346	241.778	408.229	405.198	407.465
TraesCS1A02G200000	1.067	0	1	0	-0.788	9.54e-274	161.267	158.502	158.893	371.591	371.46	370.512	372.74	370.553	365.696	133.898	135.351	133.022
TraesCS5D02G569800	-0.573	0	-0.595	0	-1.682	0	332.586	333.321	332.625	248.347	246.172	250.854	257.805	252.245	255.701	152.553	149.689	149.215
TraesCS7D02G375700	-2.096	0	-0.242	8.44e-45	-7.77	0	188.025	186.315	187.124	48.98	49.0133	47.7464	183.759	182.945	183.068	1.28515	1.18327	1.26424
TraesCS5B02G394300	1.016	0	1.747	0	3.143	0	36.833	37.3566	37.3897	84.4719	82.9224	83.1313	144.361	144.418	144.827	473.888	480.226	476.599
TraesCS5A02G457500	0.829	0	0.881	0	-2.09	0	170.313	173.94	173.859	341.686	340.278	340.014	370.536	371.5	362.96	59.4091	59.0803	58.1304
TraesCS6A02G000400	-0.605	0	-0.453	1.48e-189	-1.658	0	241.599	240.692	242.407	176.964	177.084	174.989	205.506	203.655	203.951	112.324	109.643	111.285
TraesCS1D02G268500	1.382	0	2.417	0	-3.386	0	35.3851	34.8963	34.4634	101.213	102.155	99.6734	217.61	216.181	213.965	4.69988	4.986	4.85371
TraesCS6D02G358900	1.845	0	1.876	0	3.49	0	102.004	103.987	101.135	405.943	406.942	411.962	441.969	428.936	434.817	1638.86	1678.14	1691.01
TraesCS2B02G558400	0.836	0	0.885	0	-5.414	0	86.6091	87.185	85.8616	171.832	172.179	170.509	185.297	183.246	186.637	2.76476	3.17299	2.89955
TraesCS6B02G093100	-0.749	0	-0.551	2.63e-251	-1.176	0	456.369	455.111	453.581	296.377	305.04	300.132	360.566	362.775	355.535	293.589	291.568	291.42
TraesCS5D02G412600	-0.794	0	-0.967	0	-2.49	0	1510.94	1501.74	1511.33	962.278	961.373	972.904	889.95	894.994	894.576	392.638	389.322	386.332
TraesCS2D02G073700	1.399	0	0.759	0	-2.814	0	172.964	173.171	176.548	510.111	508.49	511.869	344.635	340.184	339.558	37.1516	35.0184	35.6546
TraesCS6A02G209800	0.664	0	0.251	1.89e-44	-0.697	3.35e-287	163.748	162.595	162.893	285.881	290.501	284.101	224.289	224.943	224.811	147.916	145.652	144.497
TraesCS2B02G313700	1.143	0	0.499	3.68e-171	-1.412	0	170.975	170.32	173.581	421.015	421.418	419.818	280.534	282.211	279.984	93.5175	95.0653	92.0849
TraesCS3D02G052100	-0.99	0	-1.055	0	-1.522	0	855.742	857.546	852.473	475.039	480.406	478.612	475.261	475.417	479.153	434.086	427.206	435.257
TraesCS2D02G295500	1.22	0	0.584	3.04e-213	-1.754	0	153.945	157.328	158.873	403.938	407.497	404.658	273.243	271.298	271.354	66.8675	67.8981	67.5109
TraesCS2A02G297500	1.24	0	0.623	2.8e-215	-1.318	0	158.795	153.081	153.709	407.781	407.021	405.994	275.66	279.33	275.192	90.1443	89.5295	91.318
TraesCS1D02G203500	1.287	0	1.199	0	-1.856	0	122.567	124.633	123.785	334.881	337.277	332.444	331.432	327.744	327.188	49.0393	50.4581	49.1961
TraesCS4A02G431300	-0.79	0	-1.351	0	-6.601	0	321.322	319.072	322.903	206.482	207.485	204.672	144.338	146.694	146.448	5.0872	4.87246	4.43972
TraesCS6D02G389400	-0.672	0	-0.294	1.32e-68	-1.409	0	224.349	223.469	223.347	156.166	155.62	155.906	209.731	213.361	210.803	122.11	122.005	122.758
TraesCS4B02G285000	-0.595	0	-0.878	0	-1.839	0	406.351	402.089	403.914	294.015	298.806	297.978	255.678	253.787	254.579	162.936	162.34	166.544
TraesCS5B02G560400	-0.665	0	-0.548	4.95e-248	-1.297	0	264.213	262.675	261.802	183.274	184.379	184.551	207.876	209.694	207.258	154.461	157.011	154.399
TraesCS4A02G319000	-0.616	0	-0.714	0	-1.816	0	301.797	300.536	300.016	218.75	216.222	218.421	211.716	213.704	211.732	124.117	123.917	123.915
TraesCS2D02G530600	0.831	0	0.817	3.66e-295	-4.246	0	75.1876	76.5002	74.6998	146.763	150.468	149.83	155.13	152.755	153.907	5.36784	6.22193	5.72487
TraesCS5D02G031300	-2.051	0	-2.373	0	-3.594	0	456.325	455.247	457.573	122.583	122.136	122.124	102.3	101.534	102.347	54.5377	54.4678	55.5252
TraesCS7D02G161000	0.927	0	0.76	0	-1.399	0	148.458	150.845	148.453	313.828	314.521	316.965	291.512	293.613	292.762	82.4859	82.7105	81.1114
TraesCS6A02G382600	-0.811	0	-0.561	3.36e-224	-2.208	0	250.952	250.074	252.451	160.389	158.248	158.048	195.924	198.269	197.101	77.0853	79.3665	80.2295
TraesCS3A02G498700	-1.958	0	-0.886	0	-9.894	0	264.46	266.614	265.524	75.9084	75.3249	76.4001	166.139	166.903	166.085	0.421571	0.34721	0.446188
TraesCS6B02G122200	0.831	0	0.951	0	2.445	0	9.1327	9.08604	9.09593	18.209	17.7327	18.0051	20.411	20.4916	20.2662	71.8692	72.2156	71.7178
TraesCS4D02G283800	-0.789	0	-0.952	0	-1.956	0	283.361	283.103	287.155	183.58	182.281	182.677	169.936	170.484	170.641	106.45	105.446	107.396
TraesCS1D02G030500	1.224	0	1.153	0	-0.78	1.35e-185	104.56	106.022	105.443	274.543	272.068	273.125	270.86	272.474	270.54	89.8323	89.3295	87.8354
TraesCS5A02G368400	1.026	0	0.437	1.1e-113	-1.366	0	123.585	123.959	124.38	280.343	278.834	281.413	194.234	195.477	193.297	69.2982	69.9801	70.1287
TraesCS4A02G225100	-0.727	0	-0.561	2.94e-229	-2.352	0	62.0226	61.8407	61.9119	41.7455	41.0811	41.7685	48.5569	48.4249	48.8612	17.4604	17.8014	17.5535
TraesCS1A02G268400	1.471	0	2.776	0	-2.769	0	35.5309	35.0611	34.1652	106.429	107.343	108.525	276.677	277.135	276.932	7.90814	7.51127	6.88922
TraesCS4A02G452700	0.816	0	-0.069	0.0004738	-0.922	0	102.943	103.129	103.446	200.013	202.347	202.344	114.203	114.363	113.17	79.8424	79.44	77.7966
TraesCS1A02G369600	-2.584	0	-3.36	0	-7.707	0	767.468	764.753	768.066	141.612	141.939	142.285	86.6139	86.3253	86.4396	5.14202	5.46303	5.3729
TraesCS6D02G356100	-0.716	0	-0.809	0	-1.331	0	235.757	239.365	236.439	160.011	161.043	159.939	159.045	156.298	155.027	136.893	137.965	135.666
TraesCS2D02G300000	-0.888	0	-0.507	1.38e-144	-4.955	0	400.738	401.435	401.6	238.665	240.765	242.666	322.022	330.019	329.225	18.7349	19.0914	18.491
TraesCS5A02G024900	-2.059	0	-2.67	0	-4.055	0	375.317	375.679	378.145	99.8243	100.455	100.436	68.3496	68.3901	68.7497	32.9923	32.7792	32.7754
TraesCS4D02G041200	0.947	0	0.945	0	-1.145	0	94.2248	93.3408	95.3166	201.67	201.125	202.522	207.694	213.352	209.497	61.4958	62.5102	61.6259
TraesCS5B02G407400	-0.805	0	-1.008	0	-2.712	0	457.178	452.687	456.798	288.497	289.848	289.704	261.11	263.622	262.264	101.455	100.285	101.021
TraesCS2B02G118800	-0.953	0	-1.063	0	-3.37	0	213.76	214.288	213.029	123.79	120.872	122.908	119.298	116.981	119.123	29.9956	30.5977	29.3847
TraesCS3B02G214700	2.446	0	2.832	0	-1.92	1.91e-196	8.03591	8.40097	8.36131	49.9643	49.9501	50.0618	67.8664	68.4873	68.1078	3.0642	3.18442	3.26271
TraesCS6D02G089000	0.949	0	0.804	7.59e-302	2.078	0	8.11331	8.05588	8.18023	17.4962	17.3208	17.3601	16.2665	16.5796	16.3992	49.8922	49.6973	49.611
TraesCS3D02G188900	1.774	0	2.344	0	-1.856	4.19e-242	11.1269	11.2309	11.2482	42.2328	42.9778	42.3635	66.4061	65.4018	65.8387	4.42311	4.49224	4.55863
TraesCS5A02G191000	1.172	0	1.238	0	-0.672	2e-102	59.7945	59.9455	59.8354	150.19	149.617	149.44	165.429	162.314	162.888	54.7833	55.2345	53.5275
TraesCS7A02G313100	-1.127	0	-0.988	0	-1.758	0	186.184	184.684	185.771	94.2391	94.2899	94.2992	108.601	107.034	109.288	79.8645	78.8589	80.1248
TraesCS3B02G205100	2.815	0	2.97	0	-1.603	1.17e-134	30.9682	28.7769	27.8767	228.388	229.959	226.122	265.306	262.342	267.384	14.2636	14.1544	13.4288
TraesCS5A02G402600	-0.722	0	-1.09	0	-2.368	0	411.114	405.367	406.552	274.482	271.942	276.484	221.556	220.582	223.274	116.344	112.985	114.472
TraesCS5A02G532000	-0.916	0	-1.402	0	-8.198	0	256.103	254.805	256.705	149.894	151.34	150.453	110.344	113.199	112.906	1.24091	1.26445	1.28721
TraesCS3A02G022600	-0.845	0	-0.769	3.41e-294	-1.984	0	127.851	129.325	129.378	80.6402	79.8868	78.4085	89.0319	86.5407	87.1722	46.5049	47.5718	47.7215
TraesCS4D02G021400	-0.707	0	-0.938	0	-3.338	0	127.087	126.28	127.726	86.3446	85.833	87.001	76.7214	77.0389	76.6237	18.3337	18.5021	17.8436
TraesCS3D02G237800	3.357	0	3.602	0	0.615	1.24e-27	5.25293	5.47671	5.34019	60.8048	60.5454	61.3683	76.3937	74.729	74.8467	12.0238	11.5365	12.1535
TraesCS4B02G363700	-1.344	0	-1.253	0	-5.58	0	264.515	263.908	266.903	115.864	116.939	114.997	127.98	130.202	128.4	7.96838	7.99816	8.1679
TraesCS3A02G237400	3.019	0	3.26	0	0.758	2.9e-52	6.66838	6.4108	6.65933	59.1275	58.7175	59.743	72.3249	73.382	73.2928	15.9378	15.8407	16.6548
TraesCS3A02G148700	-0.763	0	-0.696	1.73e-278	-0.731	0	304.444	304.326	305.229	200.391	198.487	198.824	216.999	214.991	221.293	266.659	266.238	266.153
TraesCS7D02G309500	-0.768	0	-0.683	1.84e-266	-0.802	0	157.782	159.917	158.558	103.375	104.134	102.926	113.529	115.202	114.853	132.51	130.857	133.055
TraesCS7A02G294700	-0.817	0	-0.931	0	-1.571	0	226.604	225.337	223.895	140.945	141.268	143.675	136.537	137.247	136.714	109.14	110.252	110.667
TraesCS2D02G080000	-0.837	0	-0.317	6.53e-51	0.138	6.15e-12	131.839	132.33	130.069	80.9072	81.5449	82.5529	122.703	121.706	122.208	207.951	212.124	209.487
TraesCS3D02G156500	-0.851	0	-0.883	0	-1.539	0	561.092	551.682	564.131	345.02	344.069	343.234	354.12	349.217	349.807	280.383	277.879	278.92
TraesCS3A02G074600	-1.155	0	-1.106	0	-1.824	0	415.779	413.904	413.992	206.796	206.361	206.807	221.45	224.871	222.694	169.934	167.875	171.994
TraesCS4B02G067500	3.278	0	3.467	0	-1.036	7.97e-45	10.234	10.4793	10.4577	112.802	112.946	109.924	132.311	131.453	135.512	7.52597	7.26492	7.26125
TraesCS7D02G032800	1.037	0	-0.089	0.0001311	-0.809	3.85e-267	60.9135	60.6975	60.6875	138.189	138.697	138.401	66.7308	65.7113	66.0568	50.2031	50.123	50.7101
TraesCS2A02G101700	-0.997	0	-1.135	0	-4.682	0	162.26	164.722	166.712	90.4311	89.9316	94.2425	86.9088	86.0074	87.39	9.45952	9.23734	9.21037
TraesCS1B02G191200	-1.208	0	-1.457	0	-1.577	0	156.349	157.394	156.631	74.8605	76.1602	74.9917	66.0776	66.7721	65.6134	75.6626	76.8167	76.3019
TraesCS6D02G230100	-1.984	0	-1.946	0	-4.262	0	190.208	189.111	191.052	53.3046	53.7673	52.9463	56.5188	57.6508	57.2472	14.0057	14.6424	14.499
TraesCS2B02G050600	1.05	0	0.458	6.65e-73	-1.42	0	75.8967	75.9349	76.746	175.614	175.217	174.717	118.994	121.852	122.703	40.5685	41.9528	41.4183
TraesCS2B02G600200	-1.801	0	0.32	2.3e-23	-9.836	1.59e-121	39.4061	38.7822	39.1887	12.8884	12.8805	11.6222	56.6411	56.137	56.9345	0.0621344	0.0466055	0.0776366
TraesCS5B02G022800	-1.737	0	-1.976	0	-2.167	0	154.199	155.443	155.463	51.4075	51.604	51.867	45.3773	45.7585	45.7574	50.047	49.5645	50.6514
TraesCS7A02G160300	1.081	0	0.706	1.23e-156	-2.569	0	66.7201	68.0272	68.2993	159.23	159.088	158.48	128.326	127.77	127.546	16.2415	16.5993	16.8046
TraesCS7A02G036200	0.946	0	-0.17	1.93e-13	-0.775	3.73e-234	50.5979	49.8928	50.1732	107.459	107.289	107.441	51.38	51.3203	52.3545	42.4519	42.9233	42.3472
TraesCS2D02G493500	-1.978	0	-1.902	0	-2.764	0	260.585	259.98	256.011	72.5623	73.3186	72.9558	79.4662	79.6206	81.5244	54.7972	55.157	55.8846
TraesCS6D02G010100	-3.196	0	-3.311	0	-8.886	0	380.294	379.631	380.821	46.3612	45.9624	45.8624	44.8483	44.1273	44.162	1.1802	1.14008	1.17972
TraesCS4B02G184400	1.258	0	0.565	1.54e-103	-0.001	0.9814	86.4068	86.3467	87.2	227.906	229.78	232.361	148.069	149.066	148.356	124.2	125.897	126.764
TraesCS2B02G521600	-1.96	0	-1.698	0	-2.3	0	182.871	182.102	180.783	51.7634	52.2339	51.7611	64.4076	64.9891	65.3537	53.244	54.8027	52.79
TraesCS4A02G247400	4.031	0	4.204	0	0.266	0.00269	4.94402	5.42789	5.03271	94.5498	93.2203	91.8222	110.941	108.82	109.031	9.16903	9.03257	8.68474
TraesCS7B02G226200	-1.618	0	-1.591	0	-2.813	0	395.405	392.155	390.36	142.39	142.91	140.703	152.488	150.358	150.004	80.6433	81.2934	81.2523
TraesCS3D02G428300	1.153	0	0.58	2.28e-93	-1.624	0	96.2082	97.2723	96.0459	240.926	235.498	238.188	168.337	167.669	165.368	45.2647	45.9309	45.1362
TraesCS4A02G218400	-2.361	0	-3.242	0	-7.292	0	624.716	627.48	626.784	134.65	136.329	135.148	76.4952	77.5609	75.9831	5.94191	5.9933	5.45724
TraesCS7D02G293100	-0.943	0	-0.972	0	-1.489	0	165.78	168.011	164.078	95.7488	96.2106	95.4255	98.5198	97.2133	98.2579	86.5677	84.6194	86.1617
TraesCS7D02G180200	2.147	0	0.971	4.11e-208	-2.722	0	79.735	83.7606	80.259	402.087	396.63	399.742	183.711	187.862	181.659	18.6436	17.3857	17.5658
TraesCS6A02G248000	-2.331	0	-2.329	0	-4.002	0	243.451	242.18	242.671	54.1761	53.4389	53.0711	55.3465	55.9771	56.5671	22.1629	21.6886	22.0967
TraesCS1D02G165600	-0.85	0	-1.136	0	-1.411	0	133.707	137.1	134.008	82.7846	82.8939	83.5691	71.8562	70.4269	71.0985	74.3188	72.5288	74.0609
TraesCS6A02G084200	1.159	0	0.627	5.85e-103	-0.826	1.09e-129	59.8296	59.1833	60.7138	147.149	148.517	149.761	107.077	105.917	108.557	49.0364	48.7395	49.3559
TraesCS7B02G084000	1.733	0	1.046	4.41e-220	-3.33	0	71.97	74.7435	74.5225	274.886	271.034	270.709	177.792	172.337	178.866	10.5815	10.5826	10.7661
TraesCSU02G092300	-0.871	0	-1.581	0	-7.604	0	218.74	218.674	217.772	133.363	131.244	133.135	84.1514	84.5585	84.9554	1.70947	1.61966	1.55889
TraesCS6B02G117300	3.9	0	3.901	0	-1.678	2.9e-46	7.96986	8.40195	8.88063	138.191	142.247	138.02	145.91	146.709	144.213	3.54054	4.00954	3.90342
TraesCS5B02G395800	2.203	0	2.45	0	-0.47	5.86e-16	6.47758	6.23502	6.56731	33.1275	32.7304	32.6923	40.8475	40.4862	40.694	7.0047	6.81407	6.38405
TraesCS4D02G066400	4.173	0	4.275	0	-0.258	0.01984	6.50231	6.78201	6.50676	133.667	132.2	130.406	150.439	143.237	150.052	7.69026	8.3647	7.9677
TraesCS1D02G412200	-1.041	0	-0.647	1.5e-145	-0.111	4.42e-06	73.1224	72.4508	72.9163	38.8142	39.3843	39.6917	54.0065	54.4142	53.2058	96.751	99.3601	97.4953
TraesCS7A02G325500	-1.545	0	-1.369	0	-2.93	0	249.204	248.061	249.732	95.8441	94.8142	93.605	112.333	109.929	112.724	46.516	48.5527	47.1453
TraesCS5B02G152600	2.169	0	3.043	0	7.038	0	5.34594	4.90248	4.88975	24.9498	25.2376	25.3675	47.679	48.5044	48.3555	955.908	966.797	964.107
TraesCS4A02G368800	1.307	0	0.187	1.04e-09	-2.29	0	87.531	90.1657	90.2908	248.085	244.291	243.936	118.029	115.728	119.442	25.7603	27.1605	26.588
TraesCS6A02G041700	2.807	0	3.68	0	7.65	0	3.26872	3.36879	3.56983	26.6759	26.7489	25.8554	50.1351	50.6912	50.6367	996.925	991.268	986.919
TraesCS5D02G368500	-0.984	0	-1.366	0	-1.413	0	73.1758	73.6094	73.6052	41.373	41.1174	41.1863	32.5715	33.5611	32.8756	40.1036	40.1207	39.8388
TraesCS2B02G232400	4.62	0	5.501	0	5.728	0	0.945077	0.91085	1.0145	26.3078	25.9215	26.1004	51.0364	49.9918	49.4751	73.7665	73.6492	73.3421
TraesCS4A02G134100	1.199	0	0.698	2.81e-100	-1.135	5.4e-173	63.6904	62.7157	62.5849	158.25	161.648	161.791	120.227	116.151	118.61	40.8919	42.8293	41.1231
TraesCS5A02G148000	1.906	0	2.445	0	2.956	0	6.68826	6.49295	6.44028	27.086	27.0686	27.4695	41.0147	41.5896	41.0929	73.8014	72.9444	74.2627
TraesCS3B02G470400	2.106	0	1.498	0	-1.962	5.3e-228	37.6805	39.1608	38.4874	185.108	181.513	184.615	126.046	124.153	127.031	14.2544	14.1509	14.5629
TraesCS4D02G056700	3.405	0	3.32	0	0.137	0.08773	5.18386	5.2676	5.18741	61.9221	61.3671	60.6059	59.5873	60.9485	60.3472	8.44548	8.27087	8.24165
TraesCS4D02G093600	-2.838	0	-3.734	0	-7.844	0	712.32	710.942	712.7	111.439	110.134	110.062	61.3625	62.5927	61.9214	4.76719	4.35082	4.37466
TraesCS2B02G209100	-0.896	0	-1.16	0	-0.566	4.81e-145	294.077	296.497	289.415	173.656	175.253	175.925	153.199	151.793	151.139	287.139	288.703	286.623
TraesCS7D02G094900	1.817	0	2.122	0	-0.198	0.0006794	13.4585	13.5838	12.7524	51.1606	53.0933	51.3629	67.3745	66.7736	66.4022	16.4148	16.8634	17.0633
TraesCS1A02G442300	2.644	0	3.03	0	-1.769	9.37e-68	4.89999	5.80549	5.12966	36.8034	36.4186	36.6322	50.6242	50.0637	49.1134	2.11829	2.20962	2.41342
TraesCS5B02G503800	1.792	0	0.688	3.75e-96	-2.182	0	45.5072	46.5449	45.5061	175.496	175.897	177.332	86.1319	86.4855	84.1023	14.0905	15.4155	14.4739
TraesCS5B02G515100	1.675	0	1.847	0	-0.22	4.8e-05	21.2876	20.6307	20.7407	72.9312	73.4631	75.6401	86.3564	86.8247	87.8836	24.8506	26.6083	26.5949
TraesCS5A02G257100	1.35	0	1.033	1.19e-176	-9.638	2.18e-49	20.6696	20.8423	20.9287	58.9416	59.594	58.1444	48.9937	49.1397	49.8849	0.0227516	0.0455077	0.0454848
TraesCS1A02G057200	-0.911	0	-1.364	0	-2.324	0	81.9895	81.4881	83.1312	48.7157	49.0339	47.8796	37.1189	36.8625	36.9534	23.7207	24.1544	23.5731
TraesCS2A02G493600	-1.858	0	-1.751	0	-2.821	0	119.897	119.834	120.335	36.8917	36.7648	36.6373	41.3708	41.6004	40.9402	25.1229	24.3427	24.4673
TraesCS5D02G515300	2.106	0	2.304	0	0.552	8.76e-24	12.452	13.3742	13.2375	63.0784	61.694	61.8537	73.3962	76.0843	73.8639	27.5964	27.4253	28.1063
TraesCSU02G009200	1.071	0	-0.202	2.44e-11	-2.404	0	36.8371	37.4545	38.0717	87.3652	88.0253	86.7295	37.5037	37.939	37.6504	10.134	10.5318	10.1479
TraesCS2B02G181600	1.241	0	0.649	3.09e-85	-0.237	1.14e-10	40.2186	39.51	39.6168	104.051	105.157	104.023	71.8219	71.6146	73.2363	48.919	49.5457	48.5192
TraesCS7D02G322100	-1.796	0	-1.769	0	-2.822	0	303.253	304.239	303.632	96.3076	98.7161	96.3324	105.214	102.479	101.974	62.4354	62.8544	61.6364
TraesCS5D02G504600	1.277	0	0.193	1.21e-08	-2.669	0	80.4121	83.2655	79.8986	218.155	219.782	217.457	107.465	105.275	109.815	18.6449	18.277	18.6373
TraesCS2D02G316200	-1.664	0	-1.431	0	-6.612	0	131.074	131.349	131.789	46.4669	45.8613	45.7905	56.7228	56.2817	56.33	1.9592	2.01538	1.87447
TraesCS5B02G355800	-1.512	0	-0.241	8.48e-16	1.207	0	53.3674	51.5121	52.7611	20.3869	20.5378	20.4538	52.1107	51.2438	51.1278	176.287	176.097	175.62
TraesCS1A02G259700	2.443	0	1.845	0	-0.653	1.36e-30	20.216	21.0749	21.0148	126.812	125.113	124.041	86.2234	86.1936	86.8029	19.5636	18.9622	18.9526
TraesCS4D02G185400	2.169	0	1.307	1.45e-255	1.565	0	33.5779	32.3568	32.6511	165.73	163.664	162.815	94.9664	93.4924	93.9988	140.723	138.968	143.676
TraesCS7A02G178300	2.416	0	1.204	1.47e-214	-4.849	4.75e-253	46.1212	44.5125	45.6835	270.29	268.585	268.91	123.293	119.731	120.566	2.20448	2.39368	2.26655
TraesCS3B02G566000	1.548	0	1.442	1.16e-262	-0.283	1.46e-08	30.5601	32.4879	31.3589	101.188	102.204	103.058	96.7427	101.618	98.7226	37.9732	37.4824	37.167
TraesCS7D02G053100	-4.42	0	0.591	2.43e-43	-8.727	9.24e-88	29.9846	29.4212	28.8004	1.56795	1.37243	1.6337	52.2319	50.3384	51.2622	0.13727	0.0823702	0.0823286
TraesCS3D02G262600	1.588	0	1.373	8.35e-242	-0.573	1.71e-29	5.6634	5.58303	5.453	18.8578	18.3262	18.5653	16.7963	16.6634	16.6472	5.61324	5.42638	5.25415
TraesCS2D02G049500	1.146	0	-0.246	4.3e-15	-2.506	0	35.702	36.3312	37.2398	89.4383	89.3051	89.7006	35.3806	35.4843	35.8176	9.77926	9.13952	9.00306
TraesCS6A02G374400	3.809	0	3.262	0	4.538	0	11.4334	11.4906	10.9413	174.79	173.574	178.508	125.063	125.254	125.964	383.559	375.95	381.862
TraesCS2D02G190400	-0.96	0	-1.22	0	-0.704	1.11e-183	162.163	162.475	159.581	92.4385	91.404	92.3935	80.3213	80.5214	79.8659	142.862	142.876	145.665
TraesCS7D02G381600	2.109	0	2.183	0	-0.197	0.002568	16.3379	16.6922	16.7402	80.1877	77.4794	80.6581	86.816	87.2853	87.5764	21.7772	20.362	20.8711
TraesCS6A02G319100	2.485	0	1.349	3.28e-246	-1.444	9.78e-135	42.2711	42.0533	40.4487	258.304	257.641	259.23	122.602	123.034	122.491	22.6308	21.6166	22.283
TraesCS7D02G421800	-1.218	0	-0.887	1.32e-202	-1.178	0	118.295	115.743	115.399	54.7752	55.6373	56.3454	73.6085	72.2752	72.9256	75.1833	74.4144	74.4585
TraesCS3D02G180900	2.598	0	2.674	0	0.138	0.06674	13.3831	12.5346	13.7954	88.9957	88.941	88.9757	96.6368	98.4688	98.4186	20.5566	22.0194	20.8186
TraesCS2A02G156100	1.293	0	0.605	1.36e-63	-0.169	2.01e-05	33.4078	32.7724	33.7244	90.7361	90.7166	90.2477	57.5532	59.9607	58.4153	44.0853	42.477	42.3589
TraesCS3B02G550200	2.939	0	3.234	0	-7.112	3.34e-27	4.50198	4.36691	4.16549	36.2628	37.5773	37.0966	47.9952	47.0544	46.9564	0.0273421	0.0820345	0.027331
TraesCS5A02G391500	2.897	0	2.955	0	1.426	2.44e-99	5.19435	5.1071	4.84551	41.6526	41.8993	41.7055	45.8456	44.3406	45.8254	19.5785	19.5538	19.9428
TraesCS7B02G329800	-1.171	0	-0.79	5.39e-155	-1.366	0	75.8909	75.0872	75.0282	36.9224	37.1959	37.2872	50.2396	50.6152	50.4816	42.4869	42.1328	42.589
TraesCS1D02G212400	1.816	0	1.778	0	2.805	0	8.43493	8.43622	8.67704	33.0573	33.7483	33.0658	34.181	33.7866	33.5328	84.736	87.1506	87.1881
TraesCS6D02G298300	2.829	0	1.865	0	-0.437	8.9e-13	15.861	16.9514	17.1711	132.377	132.288	129.618	70.9865	69.6398	70.2774	17.7276	18.0687	17.7628
TraesCS4A02G342800	1.731	0	0.863	3.84e-110	-1.122	5.89e-114	36.0699	36.6444	36.0946	134.137	134.547	132.171	76.4831	75.7183	76.9765	24.4328	24.8478	23.2773
TraesCS3B02G451800	-1.202	0	-0.946	2.73e-243	1.23	0	205.284	205.316	210.657	101.624	98.1371	99.9187	124.451	124.396	124.527	701.06	708.052	705.438
TraesCS5B02G063300	1.636	0	1.21	5.5e-183	-0.121	0.01768	14.659	15.4499	14.8713	52.1813	51.2494	51.7294	40.1225	39.5847	40.8404	20.2093	19.9425	19.8836
TraesCSU02G113900	3.258	0	3.117	0	-1.383	1.52e-34	10.5161	8.57001	9.25664	100.63	98.4704	101.963	96.0369	91.6639	97.0874	4.94269	5.41396	5.41122
TraesCS3D02G219800	2.66	0	2.438	0	-7.078	2.26e-42	58.0787	56.1051	64.2675	425.479	416.313	410.572	365.096	378.513	375.956	0.958276	0.479186	0.478944
TraesCS3B02G266000	3.577	0	3.979	0	0.921	2.87e-18	1.97904	1.69386	2.01848	25.376	25.0198	24.9993	34.6618	34.5021	34.7663	5.24369	5.0372	5.35651
TraesCS3D02G509100	1.914	0	1.646	3e-250	-1.094	1.27e-59	21.1877	21.7988	21.376	89.4072	90.8957	88.9306	77.6893	76.9525	78.7187	14.6927	14.6942	14.3721
TraesCS1D02G414900	2.776	0	2.045	0	-0.341	9.04e-07	21.584	22.0191	23.3884	169.499	169.263	170.666	108.696	105.468	105.994	26.0119	25.7908	24.9583
TraesCS6B02G349300	1.465	0	0.447	2.25e-29	-1.472	8.62e-187	31.4894	33.0186	30.993	96.9059	96.857	98.9991	50.1017	50.2298	50.4444	17.0653	16.0937	16.7804
TraesCS7D02G499800	3.591	0	2.71	0	-1.786	2.33e-57	9.23938	9.16215	8.57687	120.162	121.562	119.213	68.4137	68.5889	67.3655	3.56384	4.03942	3.75238
TraesCS5D02G041100	1.242	0	-1.331	0	-9.551	1.56e-171	39.3192	38.871	37.869	102.208	101.026	101.571	17.8959	17.6986	17.8198	0.087332	0.0873407	0.0498838
TraesCS5B02G531900	1.78	0	0.878	8.72e-99	-1.004	3.17e-82	27.1454	27.5533	27.2987	103.966	105.358	103.316	57.955	58.4653	58.1035	19.1887	19.6786	20.4407
TraesCS5D02G530200	1.842	0	1.01	4.31e-116	-1.574	2.81e-140	25.7976	25.2298	26.0656	102.113	101.326	103.407	61.1023	58.5046	60.1879	12.4802	12.5246	12.5615
TraesCS3A02G489700	3.29	0	3.682	0	-9.557	2.5e-15	2.97854	2.7104	2.7607	30.474	30.5783	30.716	41.3317	42.0944	42.1719	0	0	0
TraesCS1D02G404300	1.439	0	-0.969	5.04e-211	-3.323	0	63.2152	62.8612	62.9401	190.985	188.98	188.745	37.8976	36.1963	37.7056	8.92864	9.25924	9.2271
TraesCS3A02G416800	-1.443	0	-1.094	3.45e-271	0.926	0	106.697	104.506	106.419	43.9433	42.246	43.4845	58.2681	57.711	56.3213	289.563	294.797	291.476
TraesCS5A02G377000	-1.52	0	-1.805	0	-1.962	0	68.806	69.6467	69.6408	27.0273	26.7074	26.8285	23.1691	22.8646	22.9254	25.892	25.341	26.2445
TraesCSU02G093800	3.323	0	2.242	0	-1.629	9.67e-65	13.3293	12.6227	13.0725	143.451	146.814	143.318	71.5523	69.8036	72.5067	6.2084	6.20902	5.88489
TraesCS5D02G387000	-2.032	0	-2.124	0	-1.819	0	61.4374	60.7961	61.0087	16.4184	16.6353	16.6818	16.1193	16.0351	16.5388	24.6421	25.6245	25.0916
TraesCS1A02G173100	-1.177	0	-1.518	0	-1.994	0	57.1931	56.9509	56.772	27.8761	28.5007	27.5223	22.3139	23.4811	23.3163	20.6545	21.162	20.4272
TraesCS5B02G172000	1.497	0	0.577	6.85e-43	-6.72	2.26e-144	33.8303	34.8562	34.1939	107.227	108.17	107.037	59.6578	59.4611	58.5686	0.45684	0.411197	0.547985
TraesCS5A02G513500	2.108	0	1.122	6.44e-130	-1.961	2.07e-159	18.2391	17.5358	18.8698	87.8789	86.5272	87.0552	45.6733	45.6778	46.4332	6.68423	6.72045	6.96584
TraesCS7B02G421100	3.683	0	2.722	0	-1.29	1.09e-33	8.00766	8.1244	7.4738	109.653	115.082	111.785	59.73	60.2309	60.3945	4.3272	5.07217	4.6045
TraesCS5A02G304400	2.017	0	1.311	2.72e-166	-0.424	2.4e-13	3.94478	3.91669	3.90442	17.3343	17.7669	17.7584	11.1048	11.3979	11.3054	4.29088	4.23929	4.19383
TraesCS1D02G179900	-1.895	0	-0.703	9.1e-67	-2.228	0	63.0615	64.6281	62.7076	18.7864	18.8222	19.201	46.5721	45.7262	43.174	19.5889	19.1112	20.2816
TraesCS3A02G272200	1.367	0	0.006	0.9325	-2.494	0	40.871	42.3395	41.3541	118.731	119.613	118.2	47.9695	48.6357	48.2516	10.3662	10.9563	10.7545
TraesCS5A02G378000	2.583	0	2.185	3.22e-277	-0.707	1.71e-17	10.1958	11.632	10.6295	72.2126	70.9738	72.6773	57.1565	56.4974	57.2854	9.79249	10.1683	8.89865
TraesCS4D02G242400	1.712	0	0.688	1.59e-55	-1.832	2.79e-183	29.0126	29.3154	28.8086	104.677	105.394	106.814	54.6607	53.9068	53.9854	11.8534	12.2603	11.3981
TraesCS2D02G493600	-1.21	0	-1.334	0	-2.39	0	51.3358	51.4583	51.3873	25.0471	24.3175	24.6451	23.571	23.4505	23.801	13.8184	14.1366	14.7429
TraesCS3A02G233600	3.681	0	3.557	0	-6.946	4.89e-16	4.46495	5.07036	4.7938	67.8633	69.7604	66.4536	65.1333	64.2924	65.8358	0.0562117	0.0562173	0.0561889
TraesCS4B02G242800	1.744	0	0.835	1.56e-63	-1.819	1.52e-146	20.3702	21.5868	21.5663	80.1344	79.6112	76.5116	44.2338	44.3066	42.7318	8.45083	9.14633	8.52455
TraesCS1D02G259500	1.646	0	0.799	8.03e-66	-1.373	1.51e-108	28.6736	27.1904	27.2049	96.845	95.8883	95.8002	55.4255	55.5637	56.4479	15.8793	15.3815	15.2739
TraesCS3D02G280500	-2.618	0	-0.886	1.24e-109	-13.749	1.21e-30	63.6054	64.8997	64.9954	11.7264	11.4666	11.7881	40.2029	39.9446	41.0906	0	0	0
TraesCS3B02G262700	3.426	0	3.089	0	-4.427	2.6e-43	27.1562	25.1779	25.7864	312.411	305.867	313.632	255.291	255.741	258.921	1.67698	1.43756	2.15525
TraesCS3D02G505500	-2.377	0	-1.379	1.04e-260	-9.956	1.06e-93	50.9107	49.9797	50.9864	10.9352	10.8803	10.6445	22.8692	22.1499	22.5867	0.0739845	0.0986559	0.049303
TraesCS5B02G265500	1.391	0	-0.574	1.33e-45	-2.26	0	20.7113	21.0768	21.3599	61.4625	61.484	60.9138	16.7246	15.9174	16.4832	6.27614	6.51397	6.34655
TraesCSU02G097100	-1.632	0	-1.307	2.71e-242	-1.799	0	69.2974	69.3979	69.195	24.8626	25.417	24.1798	32.6971	31.8339	32.7958	30.1495	28.3426	28.1836
TraesCS4B02G097200	-4.003	0	-4.331	0	-6.848	0	423.276	425.643	432.659	29.6957	29.3152	29.7493	24.1728	24.9716	24.5857	5.50543	5.477	5.15563
TraesCS7A02G228300	-1.922	0	-1.199	2.86e-168	-2.218	0	35.5068	34.1133	35.2979	10.2119	9.97473	10.5413	17.5812	17.3908	17.9477	10.9451	10.5127	11.2656
TraesCS2B02G418600	-1.706	0	-1.765	0	-2.665	0	47.1213	47.6556	48.2933	16.427	16.4165	15.8444	16.5019	15.957	16.3028	10.7861	10.7872	11.1514
TraesCS7B02G191400	-2.279	0	-1.599	2.09e-301	-2.729	0	36.2157	35.7864	36.4823	8.2283	8.38561	8.19954	13.6134	13.9944	13.8732	7.41505	8.27221	8.05403
TraesCS5B02G380600	-2.501	0	-2.496	0	-2.209	0	43.2744	43.2279	43.1232	8.4298	8.10645	8.89078	8.80639	8.73889	9.0691	13.5058	13.8927	13.2948
TraesCS1B02G436700	2.995	0	1.944	7.56e-141	-0.774	1.1e-13	6.41246	6.66853	6.89083	60.567	58.1423	57.9972	30.0987	29.0475	29.8667	6.20887	5.46083	5.282
TraesCS4D02G122600	-4.236	0	-1.125	2.59e-109	-13.175	3.21e-28	35.4609	35.4412	35.8119	2.04649	2.16763	2.0711	18.5672	19.0803	18.9991	0	0	0
TraesCS2A02G424800	2.946	0	2.152	3.45e-160	4.612	0	8.88029	10.1601	9.82887	82.296	82.5183	82.1882	49.305	48.9494	50.3179	340.356	340.797	343.144
TraesCS1A02G406500	3.024	0	1.826	1.89e-116	-0.447	1.76e-05	6.18608	6.03883	6.19031	55.0789	56.2705	54.9866	24.8459	25.4834	25.2844	6.58108	6.76083	6.26516
TraesCS4B02G367400	3.528	0	1.637	1.74e-59	-0.26	0.04582	8.4184	8.71773	7.90231	106.989	104.883	108.659	29.0559	31.6932	29.4572	9.72425	8.73468	11.8804
TraesCS5D02G398400	2.216	0	-0.466	2.28e-10	1.805	8.12e-240	5.24998	4.97149	5.33741	26.785	26.781	26.658	4.44333	4.02482	4.57832	26.4267	25.9399	26.5509
TraesCS4D02G360100	4.238	0	1.727	6.35e-46	0.014	0.949	5.62518	5.10095	4.80345	106.993	110.195	108.171	19.2872	19.8517	20.4138	7.7957	7.25254	7.70193
TraesCS5A02G175900	2.629	0	-1.012	1.5e-28	-5.871	7.76e-64	10.661	11.3218	12.0261	77.6388	77.9262	77.9562	6.47995	6.64675	6.39735	0.327978	0.281152	0.234175
TraesCS7B02G272400	3.642	0	-0.54	6.74e-05	-0.256	0.04363	3.55739	4.11798	3.62575	52.3245	52.248	52.0853	3.0352	3.17668	2.78836	4.45868	4.53875	4.73543
TraesCS7D02G367600	3.479	0	-0.813	2.64e-10	0.75	2.22e-14	4.09951	3.89216	3.98341	49.326	50.2834	48.6265	2.41907	2.5148	2.9604	10.2683	9.83848	9.11574
TraesCSU02G263900	-2.066	5.61e-305	0.022	0.7595	-3.479	0	95.6746	93.3102	96.9633	25.7809	24.4275	25.5974	116.707	115.515	103.937	12.9767	11.8199	12.4126
TraesCS6A02G085000	3.326	2.09e-304	3.288	2.3e-295	-3.488	1.3e-40	9.77647	12.4262	11.108	123.503	123.643	123.73	125.594	124.624	126.476	1.72314	1.60022	0.984251
TraesCS5B02G300200	-2.019	6.11e-304	-1.996	4.9e-289	-1.923	2.85e-291	69.1171	70.0384	69.0777	19.496	18.2553	19.2931	20.8141	20.2585	19.3753	25.2071	26.7296	27.7638
TraesCS6D02G029300	0.432	1.3e-303	0.158	7.94e-39	-2.06	0	313.133	315.991	313.24	471.169	468.969	470.941	405.774	405.423	406.746	109.055	109.973	108.959
TraesCS2D02G489200	0.701	9.93e-303	1.115	0	2.43	0	81.9286	83.9136	86.4955	151.181	152.243	151.886	212.88	209.721	210.42	657.468	656.262	659.289
TraesCS5A02G036200	-0.363	4.83e-301	-0.423	0	-2.009	0	633.256	636.9	637.239	549.699	547.132	549.948	550.347	545.071	552.42	230.244	228.002	229.504
TraesCS7D02G066500	-0.298	6.1e-301	-0.516	0	-1.788	0	548.699	552.93	547.659	498.974	496.529	494.136	447.578	444.418	443.815	230.647	231.369	230.955
TraesCS5B02G353200	-0.397	4.24e-300	-0.814	0	-2.916	0	675.198	680.067	677.404	572.878	569.109	571.772	444.863	448.467	445.363	129.398	131.747	129.773
TraesCS7A02G355400	3.549	7.03e-300	-1.007	1.41e-11	0.089	0.5142	3.38115	3.63688	3.54306	45.1968	44.1113	47.9001	2.05065	2.11921	1.91408	5.7827	5.20495	5.31793
TraesCS6B02G421600	-0.938	2.83e-299	-0.626	3.28e-136	-3.263	0	376.893	376.836	376.084	220.712	208.872	225.248	284.214	281.091	282.598	56.6951	56.7007	57.3687
TraesCS5A02G518300	1.19	1.01e-296	1.198	3.63e-297	0.163	9.16e-06	31.5799	30.8113	30.8028	77.9835	79.1112	78.8887	82.8554	82.0616	82.7546	50.4075	50.0507	50.9596
TraesCS2D02G161900	1.112	3.04e-295	0.563	7.48e-69	-0.072	0.04956	43.2805	43.0957	44.0488	104.294	104.016	104.531	74.9951	72.6293	75.5866	60.7018	60.3774	58.9926
TraesCS2D02G065100	-0.242	7.48e-294	-0.505	0	-2.94	0	2693.57	2681.83	2677.06	2522.32	2521.04	2514.37	2188.11	2191.04	2192.97	499.789	507.763	515.329
TraesCS5D02G095900	-5.637	8.23e-291	-4.466	0	-7.912	9.73e-135	52.7604	51.0426	50.8493	1.23195	1.12675	1.09144	2.75379	2.55734	2.79334	0.354995	0.399409	0.177426
TraesCS6D02G122800	-0.641	1.09e-290	-0.901	0	-2.89	0	198.699	197.962	197.897	140.365	141.027	141.79	123.138	122.26	123.353	39.0888	38.9897	38.3008
TraesCS6D02G176700	-1.385	4.97e-290	-1.187	8.36e-220	-1.909	0	46.1731	45.6196	45.1023	19.3812	19.1284	19.6827	23.4631	23.2375	22.9471	17.0754	17.9882	17.8157
TraesCS5B02G112500	-0.427	8.95e-290	-0.141	1.64e-33	0.119	1.33e-26	172.706	172.992	172.845	142.651	143.25	142.259	182.074	181.98	180.649	273.208	271.84	272.004
TraesCS6B02G245100	-0.777	1.5e-289	-0.734	3.21e-254	-1.182	0	90.3823	91.0369	89.7285	57.7796	58.6857	59.1375	62.9012	63.0351	62.9059	57.8953	57.5769	57.9978
TraesCS6B02G450000	-0.634	1.46e-288	-0.161	6.04e-21	-0.392	2.5e-119	213.255	216.257	215.242	154.85	152.715	153.784	224.263	220.131	223.412	237.333	239.048	236.377
TraesCS3A02G363700	-3.77	1.05e-287	-0.959	5.27e-59	-3.208	9.33e-290	10.6205	10.5113	10.3174	0.859973	0.817791	0.881434	6.13476	6.38457	6.21828	1.57939	1.59293	1.76605
TraesCS4B02G043700	0.772	2.26e-287	0.664	9.85e-207	-1.297	0	124.757	124.319	124.568	237.714	234.639	235.728	225.818	229.141	230.573	72.7552	72.2096	75.7468
TraesCS1D02G411300	-0.235	1.37e-286	-0.425	0	-2.383	0	1501.88	1504.27	1502.73	1418.81	1420.18	1413.13	1294.88	1297.12	1298.69	418.727	417.277	418.272
TraesCS1A02G066900	-0.99	4.12e-286	-0.723	1.82e-160	-0.867	1.44e-231	47.7532	48.6655	48.041	26.7448	27.1208	26.8984	34.2201	33.527	33.5945	37.9834	38.2028	38.7532
TraesCS6B02G160400	-3	3.67e-285	1.808	0	-7.645	1.81e-97	9.67676	10.1728	10.122	1.3576	1.36885	1.43339	40.6788	40.2372	40.5975	0.0679169	0.054339	0.0950452
TraesCS6B02G336300	-0.464	2.2e-284	-0.656	0	-2.007	0	302.491	302.502	300.432	240.704	243.711	244.253	221.805	221.31	222.184	109.13	109.033	108.655
TraesCS5D02G496400	-0.317	2.52e-284	-0.437	0	-2.049	0	1276.2	1287.84	1286.03	1145.47	1144.17	1142.18	1103.13	1096.4	1094.15	450.892	451.575	447.835
TraesCS5D02G189500	-0.635	4.59e-284	-0.932	0	-2.522	0	255.464	250.928	251.627	181.554	180.98	179.384	153.082	153.571	153.409	63.0169	64.2123	64.2096
TraesCS7D02G016800	-0.408	4.35e-283	-0.437	0	-2.554	0	473.794	475.923	473.121	396.346	398.394	395.555	405.463	405.502	406.491	117.681	114.84	118.994
TraesCS7B02G189500	-0.769	4.95e-283	-0.922	0	-1.656	0	223.332	228.548	225.507	147.662	148.432	145.294	138.64	137.222	138.266	102.273	105.631	104.003
TraesCS3B02G532000	1.038	6.24e-283	0.49	4.7e-57	-0.672	6.75e-84	7.70694	7.68638	7.62957	17.3899	17.7128	17.361	12.4402	12.5253	12.4691	6.87692	7.05099	7.04218
TraesCS1D02G096400	-1.231	1.03e-282	-0.762	3.1e-123	1.436	0	46.4974	47.5182	47.3986	22.6847	21.7207	22.4526	31.8915	32.1163	32.581	185.389	184.757	184.914
TraesCS1A02G086200	-1.061	1.25e-282	-1.018	3.04e-256	-1.79	0	41.8838	41.0378	41.8296	22.3465	21.8207	22.216	23.9735	23.4431	23.9119	17.3123	17.5144	17.5055
TraesCS4D02G339700	1.101	1.99e-281	0.432	4.29e-39	-2.14	0	50.8648	51.6946	50.9911	123.294	120.389	122.012	79.7773	79.4263	80.7292	16.4081	18.1022	16.0337
TraesCS2D02G294300	-0.33	2.02e-281	-0.507	0	-2.185	0	1159.48	1162.91	1157.36	1021.12	1027.87	1023.72	950.575	939.803	945.057	369.458	373.11	367.678
TraesCS3D02G517100	-0.437	1.7e-280	-0.092	1.23e-13	-3.351	0	1150.21	1159.6	1144.94	943.063	943.695	945.906	1255.33	1250.32	1249.34	165.64	164.666	161.154
TraesCS1B02G011100	1.49	3.06e-280	0.499	3.4e-27	-0.602	2.71e-31	18.9446	18.3061	18.5133	58.8133	57.1542	57.8823	30.3423	30.8739	30.0802	17.9176	17.6213	17.7912
TraesCS2D02G502400	-0.834	5.63e-277	-0.722	2.22e-208	-1.11	0	104.48	103.703	102.842	64.6305	64.0288	65.0373	72.4742	73.1134	72.8065	70.046	68.7006	70.4109
TraesCS6D02G002200	1.891	6.31e-277	2.145	0	1.58	1.52e-188	3.21725	3.25144	3.08461	13.0882	13.222	13.0108	16.3878	16.5157	16.037	13.8536	14.1502	13.4308
TraesCS7A02G278800	-1.135	9.07e-277	-1.013	9.86e-222	-3.066	0	76.563	75.3448	76.8123	38.7393	38.3519	38.4899	44.2195	43.3804	43.6957	13.1384	12.9316	13.5491
TraesCS4B02G091100	-0.64	9.71e-277	-0.43	2.88e-128	-2.835	0	78.9038	79.8454	79.3088	56.7307	56.2628	56.6192	67.6798	68.8609	68.117	16.0545	16.0455	16.3234
TraesCS6B02G092200	1.01	1.05e-275	1.103	0	-1.438	8.78e-304	57.8695	57.7861	56.4014	130.03	127.598	126.908	142.363	143.695	141.879	30.6967	30.4767	30.9443
TraesCS3A02G132700	1.669	8.06e-275	1.593	3.19e-245	1.015	1.57e-94	14.1635	14.6154	13.9764	50.8109	50.2357	49.8808	50.2549	50.049	49.1143	41.3344	42.4255	41.6572
TraesCS5D02G481300	-0.909	1.05e-274	-1.371	0	-1.884	0	69.3552	69.7392	70.3678	41.6474	40.9758	41.1957	30.9815	31.7013	31.1172	27.3518	27.6741	27.3031
TraesCS2A02G488900	1.082	5.54e-274	1.773	0	3.489	0	17.2037	17.8752	17.8482	41.8326	41.2526	41.2721	70.7242	68.0864	70.7034	284.936	287.669	289.741
TraesCS3D02G359900	-0.371	2e-273	-0.459	0	-1.843	0	554.023	560.746	559.465	478.167	481.781	477.104	473.026	470.383	466.928	224.568	224.292	228.153
TraesCS5B02G370700	0.687	2.71e-272	0.38	6.89e-79	-1.229	0	125.559	127.708	127.006	224.214	226.359	228.823	192.838	190.245	190.186	79.2549	78.6425	77.58
TraesCS5A02G325200	1.334	3.47e-272	0.152	0.0009414	-7.771	3.18e-113	23.3211	22.0048	22.2022	62.3085	62.9235	63.7482	28.8764	29.3433	28.6576	0.0996844	0.174465	0.174377
TraesCS2B02G336800	-1.423	9.68e-271	-1.382	5.66e-251	-7.252	6.31e-280	48.5897	48.729	47.6998	19.9006	20.0761	20.0742	21.5594	21.1849	21.6787	0.477874	0.477921	0.424604
TraesCSU02G083400	1.032	2.22e-270	0.738	2.31e-129	2.389	0	10.9002	11.0445	11.1631	25.2897	24.773	25.0731	21.3718	21.3497	21.2446	83.6163	84.0238	83.9633
TraesCS6B02G134800	1.007	2.16e-267	0.353	1.5e-29	-1.321	5.36e-264	54.49	55.8247	54.2914	123.717	121.697	121.884	81.9722	80.3697	81.0941	32.4474	31.3107	31.8646
TraesCS5D02G145300	0.943	5.83e-267	0.62	4e-107	1.545	0	173.334	173.828	173.359	369.113	374.176	367.503	309.505	307.931	308.726	734.518	738.888	731.395
TraesCS6D02G054900	1.331	8.11e-267	2.37	0	4.944	0	17.6973	17.4078	17.6363	50.2215	48.138	48.9039	105.427	105.333	105.095	785.799	782.846	787.95
TraesCS3A02G052700	-0.421	3.53e-266	-0.457	0	-2.045	0	1595.3	1576.9	1603.6	1305.08	1343.29	1312.29	1341.1	1343.61	1343.7	563.12	557.976	557.695
TraesCS5B02G468800	-0.889	9.71e-266	-0.406	2.23e-61	-1.431	0	124.658	125.39	124.972	75.7028	73.9535	75.1214	109.455	110.931	107.449	67.481	67.4188	66.8686
TraesCS2A02G527700	0.712	4.37e-263	0.905	0	-5.294	0	90.5736	88.443	91.6987	164.385	164.535	163.26	194.964	195.749	196.51	3.36175	3.31539	3.33705
TraesCS6D02G293900	2.663	1.33e-262	2.937	0	-2.495	2.77e-53	7.03119	6.73027	6.69068	47.3088	48.6078	47.9001	60.5934	60.2758	60.4593	1.92896	1.66846	1.66762
TraesCS3D02G370700	-0.534	3.24e-262	-0.395	7.4e-145	-2.708	0	445.667	449.92	445.15	340.885	345.782	341.547	388.464	392.079	400.156	98.4365	98.1452	101.135
TraesCS2D02G422700	1.543	1.69e-261	0.989	3.65e-97	3.547	0	35.723	36.7377	36.5553	117.446	116.842	118.379	86.7884	83.1923	80.6673	615.91	615.321	617.855
TraesCS1A02G253400	-0.709	1.21e-260	-0.533	1.83e-150	0.52	2.44e-184	54.1515	54.6348	54.6452	37.2728	36.8929	36.8181	43.2446	43.8875	43.7068	113.663	112.74	113.719
TraesCS7A02G350500	-3.993	2.49e-260	-3.734	1.67e-247	-10.725	5.1e-25	20.2462	21.0238	21.1014	1.56974	1.40053	1.37918	1.89668	1.7546	1.77827	0.0267426	0.0267452	0
TraesCS2D02G036300	1.091	5.51e-259	0.394	3.67e-30	-0.968	3.62e-130	44.6313	44.0085	44.0019	104.281	105.324	104.049	67.1232	67.8364	66.8391	31.6619	32.8244	33.9304
TraesCS6D02G077700	1.069	3.79e-257	0.48	9.71e-47	-0.912	9.32e-121	37.9709	36.8282	38.1757	87.4334	87.88	87.7496	60.8906	60.7598	60.8404	29.1448	29.3328	28.6397
TraesCS6D02G370200	0.753	6.22e-257	0.907	0	-0.577	7.08e-119	142.916	143.205	146.801	271.089	272.101	266.869	310.644	313.174	316.198	139.827	142.475	138.708
TraesCS5A02G548600	0.926	2.84e-256	1.341	0	-5.791	0	47.4172	46.3742	45.8734	96.8404	99.5081	98.1434	135.325	137.221	137.196	1.36681	1.19608	1.09788
TraesCS6D02G193000	0.55	1.17e-255	0.255	8.62e-52	-0.834	0	123.989	125.011	123.918	200.999	202.612	202.46	172.422	171.198	171.676	102.667	100.086	100.912
TraesCS1A02G413000	-0.822	7.32e-255	-0.596	1.14e-138	-0.752	1.07e-220	162.697	163.497	165.979	103.014	102.468	103.59	126.762	124.716	125.616	142.17	143.325	138.692
TraesCS3D02G390100	-1.224	7.56e-255	-1.136	6.51e-219	-3.431	0	126.798	126.622	126.396	59.5374	61.012	59.9748	67.9568	64.9767	67.2283	16.6073	16.8454	17.6639
TraesCS1D02G058300	-0.943	1.06e-254	-1.349	0	-3.297	0	41.6609	41.888	41.4041	24.0078	24.1044	24.014	19.6291	18.7047	18.4874	6.2022	6.30286	5.94414
TraesCS6B02G056800	1.048	1.18e-252	1.251	0	5.56	0	20.7776	21.3679	20.4002	48.911	47.461	47.1666	58.1345	56.9774	57.243	1433.8	1420.07	1426.53
TraesCS6D02G094200	0.831	2.64e-252	0.053	0.08902	-1.703	0	119.13	119.777	117.032	232.753	234.802	235.544	142.052	143.367	142.152	51.6384	54.3776	52.6296
TraesCS6B02G241000	2.11	3.05e-251	0.706	8.99e-24	0.288	9.82e-05	7.21077	7.84535	7.31322	35.5217	35.9547	35.7411	14.0428	14.7751	13.4435	13.6907	13.4565	12.4785
TraesCS7A02G264500	-0.771	3.46e-251	-0.474	8.58e-100	-0.629	5.54e-176	97.9782	96.2704	98.4677	63.0733	64.4395	62.96	82.2189	80.9422	80.886	90.4346	92.7297	91.418
TraesCS5D02G378000	0.705	5.28e-251	0.375	1.95e-66	-1.377	0	104.527	106.258	106.314	190.331	191.992	191.65	157.866	159.913	158.351	60.2458	58.1796	58.7778
TraesCS4A02G110700	1.333	8.17e-251	1.294	3.21e-232	-0.47	6.14e-23	31.5924	32.5846	32.8679	91.4436	90.6744	89.246	93.2107	92.284	90.0846	33.8685	33.5965	34.1759
TraesCSU02G243200	3.157	1.02e-250	-0.786	2.33e-08	-5.879	1.15e-25	5.25574	4.81482	5.08256	50.894	49.3446	49.806	3.5492	3.21825	3.40748	0.106758	0.160152	0.106714
TraesCS3D02G136800	-0.796	1.44e-250	-0.891	8.64e-300	-2.957	0	117.906	119.076	117.693	74.4184	75.8714	76.5075	73.7652	72.7843	74.8936	22.4161	21.9623	21.9006
TraesCS5D02G388000	2.318	8.55e-250	1.843	2.13e-150	-0.686	7.42e-14	9.25913	9.41953	10.1801	52.1165	54.3832	53.1969	39.3431	39.0488	41.5177	8.11676	8.35773	9.55372
TraesCS7A02G378800	-3.776	2.64e-249	-1.26	2.32e-79	-8.373	3.77e-66	12.7677	12.677	12.9155	0.991649	0.991996	1.12515	6.1702	6.25352	6.12103	0.0559772	0.0559827	0.0559545
TraesCS1B02G208500	-0.769	3.92e-249	-0.442	1.41e-87	-1.443	0	122.173	121.869	123.294	79.9454	80.6139	78.7735	104.453	104.957	103.671	65.8825	64.6642	65.4384
TraesCS5A02G363200	0.837	2.51e-248	-0.309	1.07e-27	-5.126	0	54.7967	53.9553	55.8474	108.324	108.674	109.409	51.5267	50.7374	51.6468	2.20684	2.20706	2.42436
TraesCSU02G132300	1.725	2.89e-248	1.567	5.3e-199	-1.223	5.81e-64	18.5417	19.1202	18.6778	68.9742	69.0377	68.7554	65.1513	65.6423	62.513	12.0246	11.6282	11.374
TraesCS7A02G317900	-1.37	3.83e-248	-1.239	6.15e-205	-1.469	4.88e-282	50.2025	49.3433	50.3282	22.0852	21.2836	20.9973	23.535	24.6616	25.3454	26.0782	25.8051	26.6739
TraesCS2D02G253200	-0.325	6.2e-248	-0.528	0	-3.028	0	1095.01	1094.05	1091.32	966.222	971.111	969.082	877.442	879.738	877.424	192.587	196.038	194.858
TraesCS5D02G181600	-0.476	1.02e-247	-1.09	0	-3.399	0	157.918	157.637	158.499	125.99	125.46	126.928	85.9747	85.6569	86.2962	22.0144	21.915	21.2698
TraesCS6B02G360300	1.434	1.17e-247	0.805	1.35e-70	-0.06	0.2742	19.4117	20.2236	20.3739	59.3049	60.0746	60.5772	39.8949	41.423	40.1071	27.2699	28.284	27.9665
TraesCS5B02G268300	2.213	4.82e-247	1.725	2.76e-141	2.784	0	6.28762	5.771	6.18835	31.0818	30.8445	31.9582	23.2885	23.9285	22.6248	60.3557	59.5486	62.4569
TraesCS7D02G226300	-1.384	2.33e-246	-1.022	2.81e-146	-1.868	0	32.9948	32.3531	32.7279	14.0621	13.7896	13.8536	18.6884	18.6903	18.544	12.6481	13.2252	13.1158
TraesCS4B02G023800	-0.644	2.89e-246	-0.929	0	-5.022	0	73.8462	73.3829	73.6818	52.5019	52.5202	51.9057	44.959	44.9058	44.4922	3.43062	3.30108	3.13715
TraesCS4A02G357400	1.983	3.93e-246	2.116	3.7e-281	0.853	2.24e-40	12.1234	11.4346	11.7862	52.6692	50.664	51.763	59.1536	59.6116	58.6647	32.1795	30.5597	29.8954
TraesCS7B02G192500	-0.382	7.23e-246	-0.663	0	-2.512	0	2125.19	2125.82	2129.19	1815.26	1807.1	1811.25	1539.36	1536.54	1590.25	543.394	540.78	538.593
TraesCS4D02G059000	-3.16	2.27e-245	-2.763	3.83e-218	-0.36	4.42e-10	11.4423	11.7908	11.7971	1.48199	1.46866	1.39925	1.93499	1.96615	2.07447	13.5672	13.2717	12.7763
TraesCS6B02G039500	-1.259	2.33e-245	-1.394	3.7e-280	-4.513	0	42.5533	42.0573	42.2704	19.4009	20.1222	19.3229	18.4718	18.8635	18.566	2.72226	2.74347	2.59557
TraesCS6A02G247900	-0.962	3.04e-244	-1.123	0	-2.771	0	62.3441	60.6061	59.8743	35.0642	34.7667	34.3692	32.5977	32.0659	32.5529	12.8657	12.8493	13.1621
TraesCS7D02G429000	-1.063	3.89e-243	-0.55	1.17e-72	-5.76	0	168.192	166.057	165.249	89.1076	88.7345	87.5642	134.256	129.301	131.443	4.4578	4.77669	4.13771
TraesCS1D02G217600	2.398	3.45e-242	1.176	1.31e-50	-0.101	0.3159	8.21715	8.0218	7.63263	46.2105	47.207	46.2224	20.5578	20.9811	20.9385	11.1667	9.88469	11.2572
TraesCS3B02G296100	1.701	4.99e-242	1.584	1.17e-204	-0.279	1.41e-05	3.00156	2.97497	2.98332	10.8232	10.6649	10.8454	10.1553	10.4606	10.4893	3.66853	3.51364	3.53637
TraesCS2B02G272300	-0.425	6.17e-242	-0.487	0	-2.569	0	1507.69	1526.21	1538.61	1264.49	1263.01	1252.29	1253.83	1279.05	1244.83	373.803	373.209	371.39
TraesCS4B02G081200	1.579	8.62e-242	1.926	0	-2.903	1.38e-190	10.3671	10.9426	10.6231	35.2992	35.8069	34.8314	45.9081	47.6753	46.9773	2.17305	2.01142	2.01041
TraesCS3A02G108700	1.529	1.39e-241	1.849	0	-0.59	5.92e-24	14.2092	14.2372	14.1413	45.0767	45.6375	45.6829	59.2935	59.4931	58.8826	13.9571	13.3652	13.7329
TraesCS7A02G471000	-0.44	7.94e-241	-0.281	2.3e-99	-0.698	0	180.441	178.499	178.976	147.151	145.833	147.059	170.083	171.946	170.834	160.559	160.366	160.107
TraesCS6A02G220200	1.658	1.09e-239	2.036	0	2.349	0	8.435	8.60808	7.77239	28.4308	29.0081	29.4995	39.5254	38.7931	39.5488	61.859	60.2966	61.3267
TraesCS4D02G358100	2.374	1.83e-239	2.817	0	-5.946	3.39e-44	4.44448	4.33674	4.5777	26.0639	25.2206	25.5925	34.9844	37.1949	36.8687	0.0786086	0.104822	0.130961
TraesCS2A02G296400	-0.308	8.83e-239	-0.521	0	-2.339	0	1216.3	1225.88	1222.82	1097.97	1092.43	1096.11	982.352	991.39	984.123	348.034	350.217	353.027
TraesCS1B02G170200	-0.897	1.55e-238	0.099	0.0002052	-7.495	0	121.797	120.767	120.259	71.3747	72.2225	72.7034	149.637	151.047	149.341	1.03691	0.806568	1.07488
TraesCS5B02G448500	-0.753	2.55e-238	-0.642	1.62e-173	-2.643	0	161.029	162.408	163.82	106.869	106.737	107.263	120.483	119.643	121.597	37.5431	36.9774	38.7017
TraesCS3A02G280700	-2.206	3.05e-238	-0.631	3.14e-30	-8.233	1.25e-98	35.0337	34.716	33.2357	8.78365	7.94184	8.05375	25.7383	24.7968	26.464	0.141967	0.141981	0.212864
TraesCS6A02G329500	1.18	4.87e-238	0.758	6.73e-91	-0.045	0.3217	28.602	29.1769	29.1652	72.2092	72.8857	73.5302	57.1017	57.1073	56.0581	41.5607	39.6606	41.0516
TraesCS5B02G381600	2.191	1.75e-237	1.873	1.02e-166	-0.313	0.000329	9.12303	10.3928	10.0709	49.9664	50.1408	49.9009	40.8976	41.9975	42.6103	10.9766	12.0656	11.5158
TraesCS1D02G280200	1.002	6.02e-237	1.29	0	0.919	1.94e-199	45.7613	46.7489	46.2041	103.204	102.967	102.169	132.221	130.099	130.468	124.909	127.635	128.144
TraesCS6D02G355000	-1.15	7.71e-237	-1.079	8.85e-207	-1.062	7.15e-212	42.9086	42.9513	43.697	21.6239	21.6835	21.5083	23.8972	23.4738	23.6474	29.7055	30.1887	30.1298
TraesCS1D02G163900	-1.361	6.27e-236	-2.229	0	-0.81	2.12e-100	90.2562	88.0898	88.0438	39.2617	38.03	37.8042	22.4623	21.9178	21.4203	73.6004	73.7198	73.2343
TraesCS4D02G061800	-0.792	3.75e-235	-0.905	7e-290	-0.927	0	98.4965	98.2596	99.8036	63.5686	63.631	62.9809	61.5761	60.2771	61.5357	76.2319	75.4781	74.6029
TraesCS7D02G280600	-0.738	6.74e-235	-0.698	4.33e-207	-2.442	0	242.141	239.837	242.471	159.823	162.517	159.706	169.959	172.836	174.372	65.0115	64.9683	63.4473
TraesCS7B02G184800	-0.996	1.6e-234	-0.876	1.49e-182	-1.682	0	46.7996	47.0986	47.1821	25.8116	26.5623	26.154	28.9734	30.0553	30.0076	21.376	20.9725	21.4555
TraesCS7B02G288000	1.564	2.52e-234	1.776	0	-0.506	3.41e-17	19.0605	18.4426	19.6216	61.9951	63.0323	62.4312	76.4878	75.6736	74.4198	19.506	19.9051	18.9687
TraesCS4A02G290400	-0.635	1.98e-231	-0.967	0	-4.914	0	175.003	174.202	175.847	126.23	123.91	125.304	102.888	102.289	105.981	8.60365	8.4795	8.18369
TraesCS1A02G069900	1.821	2.47e-231	1.767	3.3e-214	-0.628	1.08e-17	10.8687	11.3127	11.2871	43.8896	43.9958	43.3858	44.4154	43.4379	44.0801	10.5774	10.5785	10.2678
TraesCS2A02G082100	-0.742	1.48e-229	-0.24	2.59e-27	0.26	9.05e-37	88.3112	88.8543	88.2203	58.2848	58.5409	59.3153	86.4779	87.4996	86.2615	152.808	154.606	153.614
TraesCS5A02G503900	-0.666	1.74e-229	-0.561	2.04e-163	-2.362	0	299.577	297.19	294.428	206.348	208.201	209.157	234.226	233.444	231.922	84.5573	84.4588	82.4928
TraesCS3A02G435700	0.949	1.2e-228	0.338	1.23e-26	-1.924	0	90.9588	92.2572	90.5621	192.079	196.765	197.934	132.355	132.466	136.002	34.7038	36.0379	33.9694
TraesCS6B02G412100	0.656	3.07e-228	0.592	3.64e-181	1.117	0	117.865	120.506	119.716	208.215	210.248	207.86	209.056	207.606	208.614	379.698	372.585	374.571
TraesCS1A02G191800	0.966	6.15e-228	0.978	2.11e-230	-3.817	0	38.9205	38.4235	38.1157	82.276	83.6887	84.4778	87.7389	88.6613	86.902	3.8847	4.20223	3.80388
TraesCS2D02G519700	2.541	7.69e-228	1.098	2.63e-36	-4.917	5.99e-49	6.16262	6.43154	6.66478	41.5761	40.7464	42.064	16.1591	15.7505	15.8322	0.27757	0.37013	0.277457
TraesCS5A02G454300	0.647	1.06e-227	-0.661	6.22e-181	-4.113	0	136.1	137.268	138.544	237.723	237.99	240.116	100.955	101.053	99.7335	11.655	11.2599	11.6172
TraesCS4A02G065400	1.606	1.26e-227	0.452	1.72e-15	-1.99	3.04e-131	15.7186	15.721	15.8226	53.427	53.3265	52.9344	24.4643	25.1657	25.2317	5.6692	5.85751	5.74196
TraesCS3A02G334500	1.101	2.62e-227	1.23	9.49e-285	1.149	7.94e-252	33.7664	33.1607	33.4112	80.4403	79.6596	78.8713	90.4964	92.0012	90.098	106.647	106.482	109.837
TraesCS7B02G133300	-1.265	3.45e-227	-0.745	1.48e-89	-2.651	0	63.6887	63.5732	63.4502	29.072	29.5629	29.44	43.3344	43.7751	44.6804	14.6527	14.9571	14.4575
TraesCS7D02G142600	-0.987	6.59e-227	-0.886	5.49e-183	1.141	0	24.8877	25.0325	24.9665	13.9694	14.2277	13.7449	15.0465	16.0109	15.8784	79.7924	80.1624	79.6643
TraesCS3D02G355900	-3.016	7.15e-227	-1.678	6.29e-114	-3.678	7.76e-251	18.1872	17.4531	17.3149	2.30055	2.42248	2.54337	6.78891	5.97754	6.40596	2.00984	2.03548	1.95816
TraesCS1B02G395000	1.403	7.76e-226	1.337	9.57e-201	-1.173	9.73e-86	5.67972	5.49266	5.74344	16.589	16.4555	16.6178	16.4176	16.648	16.428	3.56128	3.56163	3.7662
TraesCS1D02G252900	-0.72	1.52e-225	-0.495	4.41e-111	1.469	0	42.7477	42.8942	42.6837	29.2163	28.8599	28.428	35.0917	35.4249	34.9145	172.013	172.143	171.425
TraesCS7D02G053800	-4.976	5.57e-225	1.018	3.84e-105	-12.441	2.78e-25	20.2261	20.5125	19.5787	0.769282	0.701649	0.656321	47.339	46.8631	47.2414	0	0	0
TraesCS5A02G505800	1.516	6.61e-225	1.155	2.01e-123	-3.058	5.52e-204	15.1762	16.6666	16.1882	51.4278	50.8491	50.2478	41.3335	41.4824	41.0757	2.90986	2.77935	2.67991
TraesCS7D02G256000	-2.06	1.01e-224	-0.425	4.36e-15	-7.673	2.08e-127	153.132	165.996	158.322	42.6951	41.9405	42.4496	133.124	140.446	138.293	1.13146	1.13157	1.131
TraesCS5D02G008300	-2.573	3.28e-224	-1.201	5.58e-80	-2.468	4.47e-222	28.2139	27.9504	28.5011	5.45455	5.45646	4.87827	14.1291	14.3815	14.1301	7.24052	7.20079	7.76322
TraesCS7B02G169800	-0.686	7.69e-224	-0.747	5.84e-254	-1.166	0	162.603	164.195	162.344	112.516	113.102	111.835	112.568	112.091	112.974	105.732	106.328	104.312
TraesCS7A02G115300	1.181	1.17e-222	1.634	0	3.425	0	20.7474	21.2017	20.3604	52.4159	52.3381	52.069	74.3158	75.3703	74.3482	322.768	325.95	322.395
TraesCS3D02G081300	-0.382	2.96e-222	-0.232	1.64e-83	-0.361	1.45e-202	597.362	606.159	601.822	511.806	514.314	511.776	595.483	595.071	589.128	682.741	675.427	681.282
TraesCS6A02G223400	-1.028	4.18e-222	-1.27	0	-1.689	0	64.3456	66.7	65.3982	35.8528	34.9829	36.1142	31.4793	31.2476	31.6225	29.153	29.3943	29.8558
TraesCS5D02G178300	1.448	7.65e-222	0.525	1.27e-25	-1.806	1.79e-149	20.349	20.1372	20.5779	61.0256	61.1942	62.7484	33.149	33.7114	34.8946	8.45756	8.27291	8.60245
TraesCS3A02G407200	0.96	4.63e-221	0.84	6.73e-164	-2.294	0	86.0942	86.9042	87.6945	186.358	189.835	186.66	179.886	180.871	179.672	26.1256	25.8714	25.1526
TraesCS5B02G064100	2.341	1.5e-220	2.872	0	5.172	0	2.4175	2.37254	2.57036	14.0361	13.7367	13.6195	20.5604	21.291	20.562	127.079	129.667	128.269
TraesCS6B02G161600	-0.57	3.23e-220	-0.725	0	-2.442	0	190.903	189.827	192.139	142.694	143.064	142.571	133.319	134.293	133.865	51.1096	49.6781	52.2225
TraesCS5B02G171200	1.313	4.62e-220	0.607	3.69e-42	-2.209	3.1e-225	23.1647	23.9571	23.3852	64.0464	65.3574	65.0153	41.8159	41.1001	41.4747	7.87299	7.30884	6.95224
TraesCS5B02G393900	1.505	4.84e-220	-0.905	5.29e-44	1.863	0	7.97101	8.14939	7.53333	24.6514	24.9149	24.9692	4.82393	4.93513	4.87174	41.8175	41.0545	41.9432
TraesCS7A02G557300	-0.72	1.21e-219	-0.888	0	-5.258	0	92.8211	90.7103	92.3974	61.8276	62.486	61.5889	57.7667	57.0134	57.8816	3.51297	3.44198	3.51155
TraesCS4D02G047300	-0.732	1.52e-219	-0.727	1.89e-211	-2.235	0	78.2142	79.0319	77.8115	52.4121	52.3138	52.411	54.7514	54.9522	54.7881	23.715	24.1216	24.6052
TraesCS5D02G200000	0.833	1.07e-218	1.142	0	0.407	4.49e-50	57.3378	57.0419	57.0723	111.616	113.871	113.617	143.922	147.553	146.761	110.006	108.483	111.403
TraesCS5A02G404500	1.368	1.13e-218	0.373	3.08e-14	-1.052	3.81e-75	25.3567	25.1792	25.5193	72.6837	72.9178	72.3893	38.2466	38.1337	37.7052	17.4055	17.5388	18.275
TraesCS4B02G059300	2.59	2.22e-218	3.382	0	5.757	0	4.31328	3.86986	3.80845	26.8172	26.4007	26.9457	47.677	49.4829	47.6126	311.095	313.196	316.601
TraesCS1D02G382000	1.342	2.95e-218	1.063	1.63e-130	-1.175	6.53e-95	6.20799	6.23326	6.13114	17.8778	17.3011	17.0742	14.9794	14.8158	15.1455	3.92779	3.93797	4.07306
TraesCS3A02G268600	1.194	4.43e-217	0.064	0.2152	-1.775	6.18e-219	31.0606	30.7583	30.5597	78.2388	77.8835	78.5238	37.9833	36.9345	36.9008	13.1315	12.5021	13.534
TraesCS5A02G388300	1.763	1.52e-216	-0.697	8.42e-22	-1.213	1.26e-57	5.82424	6.06366	5.43884	21.3837	21.8848	22.0152	4.02137	3.92761	4.42518	3.59543	3.59579	3.65463
TraesCS4B02G396900	2.111	4.6e-216	1.089	1.07e-50	-0.041	0.6739	2.53865	2.43947	2.50054	12.1306	11.9439	11.7805	6.34689	6.17682	5.89932	3.36901	3.46561	3.71643
TraesCS2B02G260200	-0.582	2.39e-215	-0.596	2.45e-220	-1.992	0	201.199	200.724	200.577	148.531	148.899	149.492	153.877	153.187	154.486	72.7517	74.8404	72.1715
TraesCS1B02G115900	-0.733	2.58e-215	-0.19	5.37e-17	1.433	0	101.977	101.569	103.722	68.3014	69.5909	67.3698	104.594	103.771	103.567	401.707	402.658	399.152
TraesCS4A02G420600	1.374	4.43e-215	1.15	1.48e-144	-1.429	6.33e-118	15.4925	16.0796	15.8407	44.9238	45.306	46.2291	41.6562	39.9255	40.286	8.31584	8.66999	8.55695
TraesCS6D02G367300	-0.764	1.67e-214	-0.412	1.44e-65	-3.02	0	137.204	135.79	134.905	86.0646	89.7428	90.7976	117.874	118.514	118.721	24.7738	24.1457	24.0547
TraesCS2A02G182600	-0.924	8.18e-214	-1.08	7.9e-273	-0.522	1.21e-76	53.4425	54.0909	52.8088	30.4124	31.194	32.2332	29.6041	28.6339	29.6223	54.551	53.4589	54.0613
TraesCS4B02G032300	1.618	6.37e-213	-0.376	1.35e-08	-2.243	3.64e-143	18.8956	18.8985	19.1332	64.2449	64.2315	65.5173	17.3996	16.2787	17.1203	5.74319	6.42216	5.28883
TraesCS5A02G173800	1.324	2.26e-212	0.404	1.42e-17	-2.015	9.37e-202	24.2217	23.8704	23.5872	64.9561	67.5031	66.8163	36.3467	36.0017	37.4903	8.47129	8.57938	8.68224
TraesCS6B02G257900	-1.144	5.25e-212	-1.045	4.68e-177	-1.449	0	84.9852	83.3617	82.2824	43.3051	40.2743	42.301	47.2313	47.7172	45.6878	44.7454	44.1294	44.3397
TraesCS4A02G019100	-0.479	5.35e-212	-0.59	0	-1.425	0	275.594	274.527	275.556	219.941	219.194	218.457	208.973	214.23	212.213	149.753	148.756	147.724
TraesCS3B02G213700	-0.673	7.3e-212	-0.702	4.1e-223	-4.727	0	102.523	102.504	102.162	71.0881	71.3113	71.47	72.84	72.9395	72.9563	5.72882	5.22937	5.87227
TraesCS6A02G133100	-0.608	1.72e-211	-0.915	0	-2.748	0	169.557	168.416	169.696	123.355	124.151	122.246	104.736	103.832	103.156	36.9388	36.3458	36.4088
TraesCS3D02G375900	2.627	2.23e-210	2.207	3.38e-142	0.33	0.001778	1.72613	1.75296	1.75389	11.851	12.0334	12.0069	9.29022	9.3765	9.30514	3.35397	3.14566	3.04782
TraesCS3A02G367000	-0.289	6.89e-210	-0.299	4.72e-219	-1.646	0	552.291	551.742	549.921	503.659	499.397	499.553	519.889	517.861	519.434	255.458	256.575	254.96
TraesCS7D02G228100	1.159	1.56e-209	-0.511	2.74e-29	-6.5	2.96e-190	40.5869	40.2618	41.2038	100.961	101.526	99.9992	33.4734	33.0035	32.7267	0.578142	0.622677	0.755725
TraesCS6A02G386400	2.947	2.46e-209	2.861	4.6e-195	0.211	0.09746	4.08892	3.77496	3.81631	32.9806	32.9544	34.0447	32.4796	32.9041	32.9034	7.03264	6.22545	6.3648
TraesCS6B02G450500	0.96	2.77e-209	-0.195	9.21e-08	-3.028	0	66.7482	67.8906	66.7209	144.013	148.021	142.895	68.1152	68.3175	67.2204	11.5182	12.1373	12.1753
TraesCS5B02G270200	-0.557	4.15e-209	-0.878	0	-2.632	0	131.154	133.11	133.726	100.352	100.387	99.608	83.1283	84.2425	83.411	31.1169	31.1027	30.9485
TraesCS7A02G439300	-1.094	2.87e-208	-0.343	1.03e-24	-5.375	0	129.993	131.049	127.232	66.035	68.3924	67.5419	119.03	118.764	116.708	4.50673	4.56978	4.5049
TraesCS3D02G271800	1.085	3.47e-208	-0.188	1.2e-05	-2.581	0	42.224	42.702	41.7812	100.133	99.4903	98.8031	42.2114	43.767	42.864	10.418	10.5818	9.72222
TraesCS3B02G102500	0.614	7.16e-208	0.301	2.78e-47	-0.84	2.99e-290	92.1419	90.9133	89.3165	155.502	154.108	153.141	129.78	129.772	129.114	73.7025	73.2939	73.7881
TraesCS1B02G455900	-1.246	1.43e-207	-0.712	9.62e-77	-1.396	1.36e-253	85.6853	83.8527	84.1911	39.9668	38.8143	39.9771	58.0607	59.19	62.1548	47.1921	46.2843	46.4129
TraesCS4D02G214100	-1.611	1.95e-207	-1.381	1.15e-159	-1.198	1.73e-134	27.5246	26.2517	26.3671	9.85153	9.6606	9.62084	11.7924	12.0759	11.7716	16.976	17.0022	16.6998
TraesCS4A02G286700	1.434	2.55e-206	1.396	1.94e-192	-0.528	3.59e-20	20.6881	19.5232	20.3015	59.9477	61.7287	59.7711	60.887	61.7511	61.7854	20.5674	19.1578	21.1637
TraesCS5D02G434600	1.548	6.29e-206	0.415	5.59e-13	-2.831	4.15e-177	7.0676	7.38315	7.34603	23.3541	23.9391	23.4388	10.8684	11.4408	11.338	1.5035	1.4706	1.46986
TraesCS3B02G549800	3.271	7.93e-206	3.551	1.32e-244	-8.961	1.4e-13	2.39085	2.16348	1.96526	24.0121	22.9287	22.9265	29.2159	29.6458	29.6451	0	0	0
TraesCS7B02G338200	-1.064	2.11e-205	-0.469	6.89e-45	-5.985	0	106.408	103.985	104.747	56.3944	55.8377	55.0868	86.4759	86.5223	90.7629	2.69172	2.69199	1.83646
TraesCS6B02G424500	1.559	5.23e-205	1.474	4.91e-179	-1.06	1.26e-52	10.8176	10.9842	11.0608	35.9469	35.2588	36.2952	35.0247	35.7858	34.8758	7.69062	7.6629	7.51667
TraesCS1D02G122800	-0.866	7.17e-205	-0.71	2.96e-140	-1.911	0	184.886	181.403	184.134	110.624	113.238	111.495	131.55	129.572	128.462	70.0121	71.2047	71.1688
TraesCS3B02G608500	-0.532	7.35e-205	-0.234	1.07e-41	-4.276	0	217.236	215.918	215.391	166.74	166.71	164.477	213.106	213.52	212.14	16.3316	15.9179	16.3249
TraesCS2B02G490900	0.353	5.58e-204	0.238	8.65e-90	-2.168	0	287.829	290.537	289.689	409.758	409.267	411.457	396.177	393.828	395.499	92.1608	94.2705	93.7893
TraesCS2D02G320900	-0.279	5.64e-204	-0.59	0	-3.077	0	966.853	966.673	960.538	887.798	880.19	879.716	742.012	743.579	740.837	166.41	167.979	163.336
TraesCS1A02G396200	0.683	2.56e-203	-0.832	1.24e-220	-2.683	0	94.9885	97.5527	96.7312	172.044	172.104	171.383	62.5776	61.427	64.1819	22.0113	21.5693	21.7804
TraesCS6B02G410500	3.204	5.47e-203	2.809	1.15e-151	-0.235	0.1221	3.61697	3.16014	3.24502	34.2767	34.9266	33.2889	27.3066	26.4183	27.6205	4.17047	3.96988	4.21901
TraesCS7A02G363600	1.16	1.61e-202	0.463	2.34e-28	2.203	0	9.24011	9.17675	9.22483	22.6943	22.7126	23.1763	14.4229	14.6788	15.0139	61.4999	62.1845	60.9924
TraesCSU02G063400	-0.28	3.7e-202	-0.526	0	-2.045	0	369.361	369.356	369.417	337.837	337.849	337.476	296.962	298.19	295.864	131.247	129.269	129.233
TraesCS5A02G369100	3.37	4.45e-202	-1.563	1.41e-15	-5.819	2.74e-18	6.28762	6.59913	5.35979	70.3247	69.3071	69.8218	2.41202	2.24589	2.49538	0.187634	0.187653	0.0937792
TraesCS6D02G057800	1.306	1.27e-201	1.747	0	1.935	0	13.9303	13.7788	13.6545	38.55	37.8061	37.1925	53.9215	53.8327	53.0557	76.2265	77.2682	76.0101
TraesCS7A02G093900	3.26	1.46e-201	0.052	0.7908	-0.97	1.26e-09	1.60052	1.35979	1.44662	15.5914	16.158	15.1003	1.77023	1.69664	1.82569	1.12319	1.1233	1.01878
TraesCS7B02G254000	-1.535	1.94e-201	-1.258	5.15e-143	-2.71	0	51.3876	51.1903	49.6779	19.9942	19.0831	19.2453	24.2882	25.3164	24.1434	10.5784	11.6126	11.5655
TraesCS4B02G067600	-0.808	8.86e-201	-0.703	2.17e-152	-0.014	0.6294	190.159	188.787	190.548	122.977	119.786	118.432	135	133.512	136.733	272.079	273.799	272.532
TraesCS4B02G158500	-1.2	1.01e-200	-0.906	3.06e-121	-2.608	0	29.6026	30.344	30.2698	14.8312	14.4326	14.316	18.5736	18.6076	18.5911	7.03197	7.10536	7.33789
TraesCS6D02G065900	0.812	1.02e-200	0.967	3.05e-287	-1.494	0	53.1688	53.8401	52.812	104.981	102.71	103.713	120.069	120.897	120.867	27.6331	27.7249	26.9989
TraesCS7B02G351900	1.97	2.11e-200	1.763	1.75e-155	0.277	0.0003724	24.0943	26.2531	27.3452	115.306	109.335	113.27	102.846	101.072	101.384	45.9296	44.04	46.6209
TraesCS6A02G307700	-0.354	1.24e-199	-0.708	0	-2.041	0	351.128	348.688	352.884	303.102	306.942	304.055	248.861	248.676	249.019	122.987	124.733	123.587
TraesCS7B02G482000	-0.859	3.05e-199	-1.162	0	-2.575	0	67.3169	67.6335	66.8011	41.5174	41.0587	40.9407	33.9856	35.083	35.3192	17.2754	15.9402	15.9322
TraesCS4D02G045200	1.209	5.25e-199	1.119	4.52e-166	-1.051	7.89e-90	25.9772	24.6358	25.4865	65.1686	64.8761	65.2428	64.2839	63.7457	63.3598	16.9083	17.9578	18.4183
TraesCS6B02G423900	4.033	1.21e-198	0.022	0.9502	-1.493	1.4e-10	0.749495	0.66142	0.691184	12.6095	12.7689	12.81	0.834557	0.787395	0.850367	0.444038	0.337502	0.301823
TraesCS3B02G110400	1.362	1.4e-198	1.441	1.09e-221	-0.55	1.1e-22	21.4205	21.7785	21.4707	61.4024	61.628	61.4523	67.0306	69.0133	67.2636	21.474	21.0474	21.5938
TraesCS6B02G371500	2.197	2.35e-198	1.36	5.68e-69	-0.333	0.0004859	6.41354	6.4762	6.44879	31.8365	33.8584	32.7613	19.063	18.6023	19.8244	7.15513	7.56581	7.56199
TraesCS3A02G005900	1.57	4.82e-198	1.416	4.15e-156	-0.987	5.84e-45	12.7055	13.2586	12.8303	42.2703	42.4798	43.1157	39.9083	39.2905	40.6573	9.53601	9.04609	9.8125
TraesCS3B02G095400	2.266	6.31e-198	-0.137	0.2183	-6.631	4.56e-37	8.61502	8.26859	8.62092	46.5915	45.3481	44.2326	9.52052	9.06608	8.27933	0.0933819	0.186782	0.093344
TraesCS1A02G122000	-0.915	1.64e-197	-0.777	2.85e-144	-2.48	0	106.677	107.509	107.211	63.7484	62.7163	62.8126	72.1605	72.6236	72.4319	28.3319	28.2919	26.9922
TraesCS6B02G344600	1.708	5.43e-197	1.794	3.42e-217	-1.778	4.43e-86	12.5697	13.226	12.4749	47.0459	45.7743	45.9352	52.3227	50.3351	51.0719	4.86967	5.49453	5.82459
TraesCS5A02G515700	1.237	1.8e-196	-0.174	0.0006528	-2.252	2.58e-269	30.6721	32.6413	30.6931	82.7679	83.0287	80.2102	31.6987	31.7018	33.1258	9.86102	9.02191	9.7475
TraesCS3A02G535300	-0.511	2e-196	-0.26	8.88e-53	-1.702	0	230.085	232.393	235.237	182.07	181.145	180.454	223.83	225.409	225.755	103.72	102.569	104.839
TraesCS3A02G130000	-0.816	2.84e-196	-0.501	1.15e-78	-0.457	3.16e-69	40.4525	40.5837	40.8556	25.3636	25.645	25.8607	33.1596	33.4065	33.1986	42.1026	43.591	43.1981
TraesCS5B02G036800	-0.318	5.7e-196	-0.41	0	-2.031	0	436.686	433.501	431.347	388.549	385.552	384.79	380.132	378.14	376.457	152.502	155.55	154.156
TraesCS3B02G283600	1.878	8.62e-196	-0.481	6.22e-09	-1.257	7.67e-46	14.1679	13.4423	14.1348	56.8334	56.3607	57.1354	12.1078	11.3751	11.1455	9.05312	7.55364	8.73918
TraesCS3B02G382400	-0.976	1e-195	-0.429	3.63e-43	-0.919	8.1e-180	41.2189	40.7024	40.6318	23.5091	22.5442	23.1171	35.2035	35.7671	34.4319	31.1798	31.536	31.3343
TraesCS2A02G101600	-0.542	4.57e-195	-0.346	2.97e-81	-2.402	0	469.557	474.5	470.275	359.43	357.437	361.152	426.84	433.618	428.511	129.025	130.612	128.562
TraesCS3D02G343800	-0.782	4.16e-194	-0.552	1.51e-100	-0.597	4.42e-121	81.6762	83.1359	83.5907	53.3329	53.0823	53.9886	64.3512	65.8618	65.9759	79.1901	79.5112	79.6798
TraesCS1D02G432400	-1.517	5.53e-194	-0.91	9.71e-81	-2.461	0	48.3424	50.452	49.5258	18.7332	19.1807	19.6198	29.7696	30.1244	31.4962	12.5029	12.5439	14.0452
TraesCS3A02G080800	2.03	8.59e-194	-1.396	1.96e-41	-10.777	3.2e-19	11.0466	10.8467	10.6104	49.5111	48.3685	49.4465	4.88134	4.6226	4.7953	0	0	0
TraesCS4D02G205400	-0.327	1.08e-193	-0.251	1.36e-113	-1.914	0	747.595	740.156	741.382	657.384	659.497	656.054	719.97	725.495	724.516	284.387	286.788	286.884
TraesCS1A02G254400	1.023	1.37e-193	1.003	4.25e-183	-0.644	4.71e-56	28.7056	28.2525	29.5534	63.5372	65.8152	65.8718	66.2285	66.9819	67.6338	26.1649	27.4574	26.7331
TraesCS1D02G420600	-0.766	4.14e-192	-0.499	1.79e-85	-0.669	3.09e-153	84.6321	85.1665	85.4292	55.5411	55.248	55.7845	70.3384	70.4151	68.3884	77.0296	78.4289	77.4183
TraesCS3B02G612000	1.948	7.97e-192	-0.352	4.23e-05	-3.539	3.35e-113	6.54025	6.09614	6.46728	26.5456	28.1322	27.1276	5.45274	5.72283	6.15812	0.818516	0.77182	0.794807
TraesCS3D02G375800	3.326	2.59e-191	3.707	1.11e-240	-1.33	1.08e-12	0.992515	0.918587	1.09696	11.2193	11.0527	11.2079	14.9677	15.6518	14.8895	0.537112	0.572976	0.626376
TraesCS3D02G074400	-0.633	3.85e-191	-0.406	5e-81	-0.396	9.68e-80	312.065	316.32	304.79	220.547	224.022	223.449	272.829	270.91	271.805	347.028	337.161	345.229
TraesCS4A02G228600	1.82	5.53e-191	2.278	0	2.627	0	5.14671	5.24282	4.99763	20.321	20.2733	19.723	29.0842	28.2904	29.0251	45.5233	46.8411	45.5509
TraesCS7D02G344700	-1.145	6.33e-191	-1.5	3.93e-284	-2.222	0	30.5881	30.5084	29.8072	15.1742	15.3952	15.0568	11.9741	12.6682	12.5775	9.44603	9.42998	9.39126
TraesCS7D02G010000	1.004	9.32e-190	1.335	0	-0.402	5.51e-24	16.2658	16.3479	16.2371	36.0716	35.6135	37.0606	47.7646	47.428	47.5264	18.2477	17.4637	17.9358
TraesCS2A02G437700	-0.508	4.4e-189	-0.941	0	-2.632	0	205.165	204.719	204.524	158.565	159.619	161.352	123.548	124.002	122.999	47.9038	48.1183	47.7795
TraesCS6D02G308400	1.006	6.29e-189	0.43	3.46e-31	-0.289	3.92e-13	31.8668	31.1414	31.1841	69.6504	70.5	69.8684	49.3167	49.0141	48.6218	37.285	37.793	36.8288
TraesCS5D02G470300	-0.796	1.79e-188	-0.313	1.78e-32	-1.127	0	109.017	108.575	111.73	69.4551	69.5069	71.6441	103.052	102.356	101.647	72.8059	73.8177	72.1531
TraesCS6B02G450200	-0.744	3.38e-188	-0.162	1.21e-10	-2.326	0	112.435	110.64	113.505	75.4357	73.7011	73.8847	115.844	117.318	115.215	32.9298	32.7232	31.7773
TraesCS1D02G178200	2.515	4.28e-188	2.541	5.73e-191	0.04	0.7575	5.6198	5.08897	4.8257	32.9445	33.1016	32.5524	33.2401	35.7661	35.7246	7.84759	7.61889	7.70679
TraesCS1B02G223300	2.341	5.5e-188	2.358	1.92e-189	1.151	7.16e-41	2.54262	2.31051	2.12273	12.6057	13.5994	13.0269	13.684	13.8411	13.8875	7.46301	7.32326	7.68817
TraesCS7B02G350400	1.003	6.52e-188	-0.161	0.000116	-2.361	0	48.9866	48.3273	48.4232	107.483	106.813	110	49.48	50.4625	51.063	13.4865	14.0393	13.6507
TraesCS7A02G291000	-0.683	9e-188	-0.796	6.04e-243	-1.535	0	156.006	153.643	158.315	108.078	108.243	107.216	102.64	103.957	105.631	78.9891	78.9008	76.3946
TraesCS6D02G214700	0.785	2.77e-187	0.848	8.26e-217	0.154	1.53e-07	55.9415	55.4385	56.5725	106.667	107.582	107.107	117.486	115.449	117.119	89.2475	91.2413	90.6423
TraesCS4D02G030000	1.615	5.21e-187	-0.392	4.32e-08	-0.912	5.09e-36	25.9219	26.6197	26.5076	90.0314	88.4298	90.2965	22.7063	23.5195	23.519	20.6574	19.7446	20.5728
TraesCS4D02G003600	0.827	5.47e-187	0.664	9.65e-116	-0.769	3.59e-114	58.3153	57.8637	59.1231	116.108	114.853	114.166	107.11	107.844	106.723	49.9293	49.1923	50.1686
TraesCS6D02G306000	2.48	5.59e-187	1.536	7.68e-65	-3.905	4.98e-50	1.50773	1.55167	1.57436	9.40578	9.58719	9.70155	5.22108	5.0811	5.25659	0.158455	0.158471	0.131992
TraesCS6A02G188100	-0.713	2.92e-186	-0.733	5.28e-191	-1.572	0	73.7787	74.2447	74.5929	50.3549	49.7964	50.6326	51.8953	52.2483	50.977	36.5191	35.62	36.4847
TraesCS5A02G426600	1.768	5.66e-186	0.487	3.45e-12	-3.02	8.81e-117	4.84734	5.05822	5.19607	19.2645	18.9258	18.8953	8.28114	8.13722	8.08879	0.834335	0.943255	0.924648
TraesCS5B02G496000	-0.289	5.54e-185	-0.462	0	-2.328	0	1334.85	1341.45	1346.67	1207.06	1227.03	1220.17	1131.09	1129.04	1122.58	393.023	383.13	386.85
TraesCS2B02G079100	-0.532	1.06e-184	-0.605	1.17e-237	-3.091	0	1209.42	1220.19	1209.93	922.015	918.987	952.994	925.896	933.382	911.785	212.34	207.753	199.513
TraesCS3D02G356900	-1.788	3.22e-184	-0.695	3.66e-38	-3.932	0	22.58	23.3493	22.7487	7.21568	7.13427	7.72109	15.9651	16.5529	16.6228	2.19484	2.24795	2.08822
TraesCS4D02G194400	1.236	6.8e-184	1.224	9.26e-178	-0.782	3.26e-50	30.3033	28.863	30.1795	79.6745	76.9659	77.0281	81.4632	78.7619	81.4306	23.9216	26.2814	25.1773
TraesCS7A02G429600	-0.981	1.79e-183	-0.684	1.64e-94	-1.025	2.1e-201	150.213	146.117	148.823	85.1338	82.4164	82.8094	105.189	106.798	108.906	105.524	106.4	105.553
TraesCS6A02G405700	-0.996	3.85e-183	-0.127	0.0001811	-3.115	0	53.0967	53.6831	53.4108	29.7082	29.8073	29.6271	56.8918	56.5256	56.4996	8.66441	9.0007	9.16379
TraesCS2A02G426900	1.045	2.08e-182	0.114	0.01108	-0.31	1.57e-13	21.9585	22.9712	22.4583	52.2025	51.1369	51.016	28.2855	27.9422	28.2227	26.0512	26.5417	26.26
TraesCS7B02G188400	1.092	3.15e-182	-0.385	2.15e-17	-2.647	0	9.69211	9.94215	9.90303	23.5099	23.2713	23.1075	8.86326	8.8451	8.493	2.17757	2.41381	2.25175
TraesCS7D02G419400	-1.33	6.08e-182	-1.776	2.66e-255	3.118	0	46.1359	47.1838	46.8617	21.4313	20.2929	20.1801	16.1474	14.9926	16.2725	587.084	592.826	586.38
TraesCS2B02G105300	2.494	1.76e-181	2.829	2.16e-237	1.748	3.7e-84	2.97331	3.39505	2.87617	19.8107	18.9622	19.0555	25.2211	25.6484	25.1965	14.7035	15.1842	15.1765
TraesCS5B02G182500	-0.503	2.3e-181	-0.782	0	-2.961	0	218.458	219.17	218.935	169.901	171.846	172.481	146.21	148.256	147.776	40.2193	41.1002	41.0229
TraesCS2D02G236100	-0.522	2.44e-181	-0.624	8.09e-249	-1.926	0	271.858	276.802	274.497	212.558	211.941	212.005	203.986	207.559	207.121	107.641	103.574	103.069
TraesCS6B02G015000	-0.283	3.61e-181	-0.238	1.5e-127	-1.534	0	601.497	607.906	609.153	552.203	553.382	554.076	593.698	596.972	594.957	307.601	303.371	300.226
TraesCS2A02G477700	1.209	4.74e-181	-0.972	2.24e-74	-2.894	0	52.3068	52.9174	56.1793	136.575	137.831	139.814	31.1624	32.7502	31.3995	10.7239	10.6587	10.124
TraesCS3B02G175900	-0.711	1.22e-180	-0.778	2.06e-207	-1.492	0	205.99	202.403	206.269	139.25	138.947	138.715	138.504	137.634	138.907	108.065	104.255	104.701
TraesCS6B02G299800	-0.998	1.32e-180	-0.864	1.26e-136	-2.721	0	71.2015	71.5035	71.9493	40.1018	39.8925	39.2747	46.473	45.6353	44.5113	15.8668	15.6925	15.6846
TraesCS7B02G313800	0.83	1.75e-180	0.491	3.8e-59	-1.762	0	52.0682	52.8947	52.471	103.54	103.035	104.027	84.9093	85.2805	86.095	23.0571	21.7973	22.5022
TraesCS6B02G364000	-1.71	8.15e-180	-1.526	2.04e-147	-1.559	1.18e-160	29.0137	30.3396	30.3558	10.0299	10.1369	10.2652	12.5101	11.7601	11.8176	14.5348	15.4488	14.2031
TraesCS3A02G183900	-0.897	8.31e-180	-0.772	2.77e-134	-4.551	0	51.5038	52.6054	51.8391	30.9613	30.9383	31.0877	35.4923	34.9287	35.3626	3.11237	3.15532	3.38812
TraesCS6A02G406500	0.989	1.23e-179	-0.06	0.1963	-2.66	0	44.447	46.0952	45.1275	99.5777	100.465	98.9805	50.811	49.5703	50.3385	10.6197	10.0836	10.4502
TraesCS6B02G262000	0.604	1.31e-179	0.648	6.21e-205	-0.281	7.41e-34	111.608	112.591	110.133	187.876	187.437	188.598	200.574	204.262	201.749	133.015	133.347	133.032
TraesCS4B02G059500	-2.327	2.1e-179	-1.882	6.52e-137	0.432	1.62e-15	9.20018	9.62543	9.37064	2.01826	2.11074	2.11054	2.94414	2.85654	3.06155	18.3559	18.87	17.9686
TraesCS2B02G329600	-0.474	2.47e-179	-0.5	1.99e-194	-3.512	0	115.743	116.347	116.294	92.172	92.6782	93.5956	95.5154	94.798	94.9313	14.8515	14.714	14.7343
TraesCS2B02G096200	-0.658	2.54e-179	-0.23	1.76e-24	0.405	4.1e-87	127.098	128.899	128.571	90.6534	89.8176	90.0533	127.065	126.957	125.681	247.704	243.696	247.296
TraesCS4A02G103300	1.195	1.02e-178	1.13	4.35e-156	-0.373	1.05e-13	30.2033	30.7379	29.8569	76.8627	77.6323	76.2962	76.9964	75.6936	77.4826	33.8434	33.8468	34.0759
TraesCS2B02G256300	-0.671	1.38e-178	-0.755	1.06e-215	-2.263	0	225.789	230.215	227.545	159.144	160.12	157.167	155.664	155.827	157.49	68.6641	69.2239	68.6916
TraesCS4B02G107500	-0.635	6.52e-178	-0.685	1.28e-199	-0.804	1.97e-277	69.6638	68.4678	68.4523	49.175	49.4037	49.1254	49.4979	49.0022	50.28	57.4316	57.1707	57.1419
TraesCS7A02G517700	0.384	1.09e-177	0.263	3.82e-80	-0.068	2.72e-06	130.813	130.332	131.454	189.163	188.58	191	181.733	182.301	181.384	181.992	179.967	181.449
TraesCS3D02G325800	0.984	3.1e-177	-0.258	3.83e-10	-3.383	0	57.6148	59.1869	57.0894	127.035	127.829	126.943	55.6386	55.8767	56.9454	8.18595	7.92437	8.07772
TraesCS3B02G306000	0.818	6.64e-177	-0.412	1.67e-35	-2.745	0	66.1477	67.8549	66.4355	130.519	132.162	129.506	57.1744	59.0633	58.2502	14.3192	13.9544	15.1188
TraesCS3B02G414800	2.179	1.06e-176	1.855	7.28e-123	-0.668	1.52e-10	2.36426	2.32431	2.47342	12.2601	11.9165	11.8253	9.91706	10.0332	10.0474	2.17555	2.04587	2.32072
TraesCS3D02G479900	0.686	3.08e-176	0.192	3.74e-13	-0.694	6.86e-136	12.259	12.1842	12.2674	21.7041	21.8587	21.9792	16.0287	16.2813	16.2627	11.1662	10.7863	10.9712
TraesCS5A02G153900	1.378	3.36e-176	3.865	0	7.998	0	6.23622	6.54671	6.03918	18.084	17.9716	18.2519	106.215	104.683	106.654	2329.09	2319.14	2336.22
TraesCS6D02G371000	3.916	8.9e-176	3.99	2.45e-182	-0.287	0.1696	1.5435	1.62093	1.69902	27.338	27.7176	26.457	29.7688	29.8958	29.8538	2.00538	2.00558	1.77148
TraesCS1D02G434000	-1.025	1.84e-175	-0.935	1.26e-145	-0.913	3.01e-146	44.7903	46.6442	45.3462	25.3836	24.7027	24.514	27.8285	28.2062	26.8306	35.5955	34.7531	35.0409
TraesCS3D02G309400	1.553	2.78e-175	1.49	3.31e-161	-1.63	6.6e-180	301.953	305.211	307.223	1004.02	991.798	983.566	999.028	993.469	982.746	133.662	133.197	161.882
TraesCS3A02G349900	-1.464	3.67e-175	-1.058	2.02e-101	-0.52	1.55e-30	22.9215	23.3576	23.6523	9.59017	9.01647	9.53855	12.7937	13.1173	12.9961	23.2941	23.16	24.3069
TraesCS1B02G455200	2.847	8.11e-175	2.88	3.54e-178	4.398	0	0.788929	0.924018	0.872571	7.05578	6.80937	6.77888	7.46326	7.26376	7.31921	26.3717	26.161	26.5491
TraesCS4A02G299100	1.13	3.61e-174	1.717	0	-2.277	3.99e-244	93.8381	94.997	97.1088	235.215	231.346	228.253	363.434	361.998	363.216	28.3531	29.8775	27.3738
TraesCS6D02G224600	2.188	5.33e-174	0.162	0.1363	-1.293	1.73e-29	4.20113	4.11378	4.15999	21.0866	20.9464	21.071	5.42054	5.72747	5.02026	2.55203	2.55228	2.28526
TraesCS6B02G071600	1.511	2.44e-173	1.419	7.81e-150	-1.359	3.5e-75	24.7661	24.0791	25.1287	76.715	77.1204	80.141	74.9042	74.4886	79.6148	14.0121	13.1787	14.6621
TraesCS7D02G294300	1.03	2.87e-173	-0.342	4.22e-15	-3.119	0	9.97185	10.049	10.0039	22.5023	22.9694	22.5886	9.17235	9.29928	8.95699	1.77682	1.63484	1.60357
TraesCS2A02G518100	2.193	1.48e-172	0.405	2.35e-05	-6.442	5.21e-35	7.46338	7.31296	7.16521	37.2642	36.0783	38.0367	11.6502	10.7582	11.2451	0.137364	0.091585	0.137308
TraesCS1B02G424500	0.762	1.48e-172	-0.455	6.66e-48	-2.083	0	63.4852	64.161	64.0619	121.469	119.8	119.584	54.4353	54.3836	53.0977	21.2829	21.8647	22.5295
TraesCS3D02G258900	-1.49	1.96e-172	-1.534	3.62e-174	-2.325	0	21.2607	21.0782	21.8498	8.56411	8.40515	8.40438	8.64891	8.64975	8.37812	5.93917	6.45005	6.20198
TraesCS5A02G279700	0.841	2.11e-172	-0.005	0.9289	-1.171	1.6e-205	57.7398	57.6143	57.6114	114.956	114.9	114.085	66.0391	67.2686	66.2599	37.2858	37.4518	36.7435
TraesCS5A02G155000	1.339	4.01e-172	1.138	2.43e-119	-0.294	3.81e-07	4.65071	4.74263	4.52946	12.9624	13.0464	13.085	11.8671	12.0459	11.566	5.38037	5.58131	5.5184
TraesCS3A02G156800	0.682	5.54e-172	0.727	6.75e-194	1.189	0	74.7506	73.0642	73.1031	132.095	130.567	130.772	141.149	140.132	142.342	242.785	242.159	245.865
TraesCS1B02G270000	1.016	5.74e-172	0.091	0.04837	-1	2.03e-106	38.4115	38.6846	37.034	86.1051	85.2063	84.9743	47.6347	46.2434	46.8866	27.7737	27.6149	27.3992
TraesCS6D02G322200	0.966	6.41e-172	0.94	7.38e-160	-0.443	2.87e-28	28.4413	28.3762	28.5303	60.7666	61.7421	62.5575	64.1717	61.9214	63.5566	30.3465	30.2936	30.446
TraesCS1D02G003700	0.624	1.49e-171	0.118	2.59e-06	-1.291	0	154.199	153.456	152.77	262.423	259.779	265.758	192.779	191.84	194.071	90.8916	90.283	91.7808
TraesCS4A02G228800	2.801	4.23e-171	2.967	6.89e-193	3.711	0	1.82472	2.11315	2.23441	15.4447	16.233	16.0703	18.6253	18.5756	18.7038	39.261	38.4813	39.5061
TraesCS5A02G443900	-0.771	5.55e-171	-0.747	1.43e-157	-2.347	0	108.098	105.673	108.608	70.1741	69.8642	69.6349	74.6629	73.6738	74.0457	31.0461	30.7682	30.1208
TraesCS2A02G254200	-0.815	7.4e-171	-0.625	3.08e-103	-5.36	0	65.5126	64.5914	65.0619	40.9083	41.3786	40.8618	49.0113	48.9524	48.548	2.25061	2.27478	2.36936
TraesCS2A02G066700	-0.313	1.62e-170	-0.505	0	-3.217	0	3062.08	3053.9	3103.85	2756.08	2758.72	2723.85	2534.45	2494.09	2493.99	480.7	469.602	488.002
TraesCS6D02G048300	0.927	1.68e-170	1.242	0	5.273	0	16.9349	16.3213	16.6778	35.2419	35.436	34.7208	46.345	46.0787	44.351	931.231	938.274	932.781
TraesCS6A02G333600	-1.779	1.71e-170	-1.721	3.99e-157	-1.92	8.22e-193	18.5597	18.4676	18.1162	6.0463	5.72049	6.06607	6.67624	6.16799	6.53425	6.88778	6.98031	7.27513
TraesCS6A02G372100	-0.614	3.72e-170	-0.663	5.14e-191	-1.027	0	236.48	241.598	238.864	174.32	173.685	171.908	175.845	176.594	172.061	169.607	170.553	170.364
TraesCS6A02G220500	0.603	5.26e-170	0.669	4.38e-208	-0.09	0.0002108	102.71	103.164	104.682	174.986	174.486	174.19	191.125	192.178	188.633	140.955	141.676	140.862
TraesCS5A02G054900	2.628	2.12e-169	-0.84	8.5e-09	3.19	1.03e-259	2.0616	2.08295	2.33667	14.7021	14.8081	14.9682	1.3975	1.42018	1.37506	29.0352	28.5804	28.2356
TraesCS4D02G341900	1.045	3.56e-169	-0.092	0.06082	-0.935	9.3e-88	32.6775	32.0276	32.2942	74.5519	74.0397	73.5246	34.846	34.7826	35.7508	24.3822	24.9876	24.2593
TraesCS2A02G066900	-0.344	5.07e-169	-0.394	6.16e-220	-3.674	0	1837.22	1819.13	1832.06	1595.85	1594.72	1609.86	1632.09	1612.45	1590.97	200.762	212.468	210.544
TraesCS3D02G534100	-1.098	7.87e-169	-0.654	1.01e-65	-3.094	0	32.4927	33.5123	33.0701	17.6721	16.6142	17.0838	24.6593	24.1182	24.1516	5.45957	5.90076	5.47651
TraesCS7B02G162600	-0.8	2.15e-168	-0.402	1.59e-46	-0.239	1.2e-18	51.8343	52.1532	52.613	33.7135	33.0462	33.0597	45.675	46.4753	45.1231	64.2124	63.9265	64.3951
TraesCS3B02G344800	-2.309	5.88e-168	-2.496	2.02e-174	-5.794	2.39e-161	15.4422	15.0963	15.8422	3.45562	3.3979	3.53506	3.15996	3.18222	3.18215	0.470298	0.44559	0.29691
TraesCS3A02G231100	1.648	7.64e-168	2.999	0	0.662	1.98e-24	21.6007	20.5654	21.5462	73.8726	75.2927	72.4311	193.168	198.306	198.376	49.4518	47.281	49.599
TraesCS1D02G431700	1.733	8.98e-168	1.372	2.58e-99	1.061	7.49e-59	3.06707	2.95037	3.09048	11.353	11.3365	10.9168	9.18561	9.0724	9.03795	9.38295	9.21655	8.98031
TraesCS4A02G234100	1.216	3.47e-167	1.875	0	-2.767	2.74e-233	14.5963	14.5779	14.3584	37.3879	36.7278	38.1696	60.8108	62.8078	61.3463	2.99424	2.99454	3.29233
TraesCS4D02G079900	1.567	4.8e-167	2.408	0	-2.57	1.57e-117	7.23674	7.03624	7.16101	23.4221	23.3143	23.7568	43.9752	44.3683	43.4169	1.90031	1.68121	1.65601
TraesCS3D02G517300	2.445	1.23e-166	3.503	0	-0.293	0.01675	4.21702	3.84946	3.71754	23.7434	23.6875	23.7816	51.7109	51.0704	51.8941	4.57083	4.65219	4.73071
TraesCS2D02G034400	-0.278	2.27e-166	0.061	2.95e-09	-1.154	0	1045.57	1042.39	1044.47	955.217	957.155	955.464	1264.87	1261.96	1258.24	680.897	679.449	682.36
TraesCS1A02G115900	-0.32	3e-166	0.168	4.11e-50	0.351	2.18e-232	917.783	921.815	926.656	819.303	820.797	819.844	1198.69	1197.71	1201.79	1700.22	1709.03	1710.73
TraesCS5A02G383200	0.903	1.3e-165	0.639	7.58e-78	1.189	5.7e-303	31.5669	30.6166	31.7394	64.9828	65.126	64.8308	56.3629	56.3146	56.6634	103.975	103.439	103.356
TraesCS4B02G281800	1.723	1.76e-165	2.321	0	-3.197	8.49e-105	7.05228	6.93381	7.00926	26.3331	25.4711	25.1249	39.9589	40.3471	41.1915	1.09792	0.982451	1.24188
TraesCS6D02G170500	-2.611	1.39e-164	-1.468	2.21e-82	0.118	0.07134	10.0424	9.99186	9.70212	1.91219	1.61345	1.87941	4.16281	3.95878	4.33039	15.7427	15.6604	15.422
TraesCS3D02G282100	-0.846	1.48e-164	-0.525	2.44e-67	-1.664	0	69.3792	68.9269	70.6541	43.617	41.8568	43.5617	55.5676	56.6889	55.9189	31.717	31.8041	32.1515
TraesCS6D02G197800	-0.544	2.11e-164	-0.621	3.28e-205	-0.991	0	78.7697	78.4221	78.1968	59.9139	59.3008	59.985	58.8225	59.5243	58.9139	57.112	58.2674	56.5003
TraesCS7B02G175200	-1.094	2.84e-164	-0.688	2.82e-71	-1.104	4.92e-170	35.9171	35.1969	34.6997	18.3423	18.0924	18.5851	24.8378	25.6791	25.5353	24.1162	23.2647	24.0603
TraesCS7A02G297900	-0.779	4.71e-164	-0.743	1.16e-146	-1.384	0	45.3562	45.4914	45.3872	29.1657	29.5039	29.4738	31.1772	31.562	31.546	24.9029	25.4221	25.4436
TraesCS3B02G191100	-1.151	5.38e-164	-0.828	1.33e-90	-2.426	0	37.9595	37.0419	38.2374	18.8292	19.3389	18.4518	24.1697	24.5768	25.1384	10.1697	10.1453	10.267
TraesCS3B02G152200	1.894	6.32e-164	2.749	0	4.533	0	4.92969	5.08452	4.98445	20.4055	20.5358	20.9525	38.4873	38.8213	39.4807	169.307	167.834	166.695
TraesCS7A02G489500	-0.628	7.53e-164	-0.891	1.88e-297	-0.398	1.72e-71	61.0627	60.4536	61.0788	44.2259	43.4137	43.5085	38.0692	37.9073	38.0721	67.0274	66.7694	67.2492
TraesCS3A02G365300	0.754	3.66e-163	0.426	1.09e-48	0.226	1.7e-14	25.083	25.7802	25.8948	47.6098	48.0133	48.1056	39.6654	40.223	39.5468	43.4619	42.9178	43.8707
TraesCS6B02G063900	2.07	1.29e-162	3.335	0	6.398	0	3.61706	3.56938	3.93323	16.9451	17.2748	17.5969	44.7243	42.6873	42.5055	454.294	452.765	453.323
TraesCS7A02G235100	-1.129	1.8e-162	-0.566	6.54e-47	-2.827	0	50.5909	51.4124	50.5383	25.9636	25.7776	25.6638	39.7289	38.9232	40.666	10.536	10.1858	10.4615
TraesCS6D02G252400	-0.804	3.61e-162	-0.635	4.26e-103	-3.115	0	94.1483	93.743	94.0028	59.7124	59.0147	60.4464	70.5596	69.4102	70.2758	16.1932	15.7238	15.2814
TraesCS5A02G165400	-0.15	3.64e-162	-0.324	0	-1.694	0	5923.63	5893.3	5874	5939.74	5870.84	5889.57	5445.45	5438.91	5485.48	2636.7	2644.15	2651.62
TraesCS1B02G264900	-0.601	7.28e-162	-0.419	9.4e-81	0.961	0	45.7236	45.4555	44.4851	32.5291	33.2468	33.5331	39.6268	38.832	39.0403	128.228	127.565	127.469
TraesCS3A02G332300	0.826	7.44e-162	-0.18	4.56e-07	-2.782	0	76.4737	74.9287	75.9933	149.966	149.704	147.923	76.278	78.2607	77.8638	15.9406	15.1996	16.8249
TraesCS3B02G153900	-0.615	8.63e-162	-0.662	3.56e-181	-2.928	0	138.197	137.957	138.736	99.5093	101.299	100.011	102.058	101.116	100.47	26.5053	26.3499	26.2419
TraesCS3D02G089100	1.413	1.04e-161	0.867	3.69e-56	0.311	9.56e-08	8.69023	9.17251	8.26653	25.3063	25.8917	26.054	17.8498	18.4589	18.9002	15.194	15.7353	16.1008
TraesCS5D02G159100	1.461	2.25e-161	3.771	0	7.342	0	4.88087	5.12878	5.17788	15.5332	15.272	15.5964	79.1244	80.4397	80.5537	1191.99	1196.38	1187.62
TraesCS6A02G203700	-0.488	2.26e-161	-0.848	0	-1.484	0	113.332	114.804	115.994	91.2921	90.5544	90.5942	73.8076	73.4789	74.1221	60.3714	58.6952	59.4229
TraesCS1B02G263900	0.95	4.63e-161	0.91	1.63e-144	-0.111	0.007143	26.9625	28.1258	27.549	58.9528	59.2002	59.104	60.3642	60.066	59.3803	38.0465	36.2207	36.7453
TraesCS1A02G051700	-0.772	5.01e-161	-0.389	3.92e-44	-1.359	0	101.367	100.378	101.81	64.5109	66.9837	65.7938	90.9565	89.7964	87.7332	56.3813	57.9831	57.3642
TraesCS7A02G068500	1.125	5.63e-161	0.941	4.63e-108	-1.125	1.19e-94	21.9534	21.9293	22.5734	52.9979	53.2009	54.7242	49.0176	49.3462	49.3745	14.3789	14.8453	15.0037
TraesCS3B02G394600	-2.434	1.66e-160	-1.469	2.49e-80	-3.447	2.87e-206	10.9568	10.5438	10.8047	2.15587	2.17192	2.30936	4.8532	4.30678	4.35795	1.5035	1.48437	1.31021
TraesCS6A02G402000	-0.933	3.47e-160	-0.824	2.57e-125	-2.881	0	26.4948	26.3328	26.1585	15.3844	15.273	15.261	17.0876	17.2909	17.3024	5.04265	5.41771	5.09409
TraesCS6A02G215500	-0.504	1.59e-159	-0.615	1.8e-225	-1.05	0	84.2573	83.6812	83.9684	65.7322	65.6223	65.8377	63.9145	62.7577	63.8079	58.6269	58.9957	58.9101
TraesCS1D02G430700	3.561	6.45e-159	3.853	1.5e-187	6.828	0	0.807	0.658876	0.708669	9.26809	9.52404	9.69689	12.1055	12.3714	11.9123	119.728	119.282	119.42
TraesCS1B02G055200	-1.177	9.1e-159	-1.201	6.23e-159	-0.464	2.35e-31	46.3784	46.0296	47.5971	23.3114	22.8929	22.5496	22.7496	23.7369	24.0541	48.3473	49.2123	49.7607
TraesCS1D02G197400	-0.599	9.23e-159	-0.338	8.93e-53	-1.414	0	124.307	126.807	125.394	93.1227	91.7369	91.0422	114.635	115.388	115.053	68.5016	68.5373	67.9551
TraesCS1B02G132100	-0.902	1.19e-158	-0.77	6.22e-117	-0.65	2.48e-90	49.605	49.8305	48.1521	29.5512	29.0866	29.0649	33.6648	33.6468	32.9243	45.2995	44.8251	46.3102
TraesCS2B02G048400	1.446	3.17e-158	1.544	2.21e-180	-5.178	3.85e-123	10.0785	9.90363	10.593	30.9526	31.0057	30.5165	34.3107	35.4012	33.5571	0.453118	0.453164	0.319719
TraesCS1D02G195400	0.851	1.32e-157	0.678	2.35e-96	-3.928	0	52.7031	52.3338	52.0155	105.332	105.067	104.093	97.239	98.8997	94.9213	4.90268	5.24525	4.82471
TraesCS1A02G111900	-1.006	2.37e-157	-0.733	5.16e-88	-0.931	1.39e-140	45.6211	46.045	45.1194	24.7986	25.1848	25.6045	31.86	32.1858	31.2917	34.5659	34.2055	35.3352
TraesCS7D02G272500	-0.631	4.66e-157	-0.563	2.68e-124	-0.948	0	101.083	100.552	100.234	73.1095	71.3957	71.934	78.6908	78.3004	79.6566	75.2926	76.1981	75.6052
TraesCS6D02G154600	-0.692	8.4e-157	-0.346	8.16e-42	-6.973	0	44.7235	45.9513	44.8072	31.2128	31.1015	30.7729	41.2206	41.0995	41.1668	0.500368	0.538912	0.525815
TraesCS1A02G272000	2.909	9.22e-157	0.131	0.446	-3.872	1.06e-30	0.988013	1.1782	1.07742	8.92545	8.89213	9.21927	1.41151	1.31663	1.38447	0.107164	0.107174	0.10712
TraesCS1D02G306200	0.474	1.82e-156	0.018	0.4421	-6.22	0	181.605	185.017	184.167	284.304	283.985	281.083	215.543	216.636	213.829	3.34622	3.40853	3.96428
TraesCS6A02G385400	0.821	3.59e-156	0.881	7.66e-179	-0.37	2.73e-26	81.8199	85.8351	84.3975	164.173	165.178	164.831	176.077	179.483	181.967	94.8267	92.4473	95.8029
TraesCS3B02G133400	-0.307	7.19e-156	-0.241	1.21e-95	-0.09	2.73e-15	233.217	230.985	231.084	208.671	205.915	209.367	227.07	227.484	226.838	316.176	317.254	314.296
TraesCS6D02G384200	-0.766	1.14e-155	-0.761	3.55e-149	1.097	0	27.0439	27.48	27.1969	17.9959	17.9561	17.3931	18.5501	18.7576	18.5515	84.8911	84.2151	84.5552
TraesCS4A02G182800	0.977	2.23e-155	1.037	4.88e-174	-2.889	0	8.85918	8.98236	8.914	19.3061	19.4608	19.6771	21.2208	20.8487	21.4921	1.69784	1.84523	1.69715
TraesCS1D02G292500	-0.55	2.3e-155	-0.523	7.9e-138	-1.488	0	178.45	176.988	179.824	135.639	134.944	135.131	143.619	143.888	143.949	92.159	91.6642	92.9853
TraesCS4A02G021700	1.541	3.85e-155	2.329	0	-2.317	7.07e-108	8.53445	8.29666	8.46853	27.3644	27.672	26.6838	49.9486	48.8776	48.441	2.74481	2.34054	2.2816
TraesCS6B02G112800	0.782	3.93e-155	0.229	1.49e-12	-1.37	8.64e-279	55.2036	54.2308	53.6532	103.439	104.222	103.714	72.8158	73.4723	75.0785	30.4124	30.3457	30.8184
TraesCS3B02G152300	1.091	5.1e-155	1.607	0	2.058	0	18.809	18.9146	19.3618	45.2766	45.5635	44.1548	67.2052	67.0741	67.1276	114.128	117.214	113.523
TraesCS2B02G482600	2.77	5.28e-155	-0.073	0.6881	-1.235	6.87e-15	5.7477	6.10416	5.21798	43.116	44.2108	41.9339	6.66643	6.15911	5.96849	3.65236	3.5811	3.29295
TraesCS3A02G382200	2.441	6.1e-155	3.178	2.03e-273	-0.806	7.2e-10	1.98762	1.8363	2.03955	12.2081	11.5662	11.5813	20.3764	21.0462	20.053	1.62863	1.71023	1.52622
TraesCS7D02G086500	-0.641	6.51e-155	-0.243	1.96e-24	-1.257	0	884.524	896.735	871.878	635.517	630.323	623.355	871.165	859.564	866.222	533.104	541.866	535.711
TraesCS3B02G127700	1.512	1.66e-154	1.77	3.16e-215	-0.793	1.26e-27	9.76355	9.62179	9.93745	30.1172	30.8832	31.8418	38.2902	38.9846	38.5745	8.62654	7.2424	8.68072
TraesCS6A02G068300	0.885	2.09e-154	1.066	1.05e-226	-0.781	1.45e-82	38.1096	38.5037	38.0759	78.1666	77.8502	79.0746	92.0993	93.4205	92.5222	32.4868	31.8403	32.5097
TraesCS6A02G105400	0.691	3.4e-154	0.08	0.01105	-1.749	0	75.8425	76.6042	75.8644	136.272	136.693	136.249	92.7713	91.7516	94.8678	33.3946	32.3463	32.8012
TraesCS4D02G201800	1.106	1.22e-153	0.901	1.92e-97	-0.319	1.01e-10	43.6799	44.0197	42.1547	103.331	103.101	103.89	95.0311	91.8883	93.9082	49.9741	51.3208	49.7527
TraesCS6A02G093300	0.517	1.33e-153	0.345	2.27e-65	1.712	0	11.0459	11.0766	11.0113	17.4698	17.6832	17.4692	16.1985	16.3893	16.1573	52.5114	52.2681	52.7194
TraesCS5D02G159900	1.042	2e-153	1.13	5.64e-180	-0.647	3.23e-42	7.63687	7.5382	7.71703	17.5537	17.5359	17.2471	19.6011	19.4336	18.9875	6.9174	7.34041	6.95479
TraesCS1B02G068500	-0.752	2.94e-153	-0.306	2.91e-28	-0.699	7.43e-137	79.3322	78.5884	78.6066	51.7596	53.0234	51.1387	72.2988	75.1911	74.0252	70.8186	70.4546	70.1336
TraesCS5D02G302600	-1.002	4.73e-153	-0.692	8.03e-77	-3.209	0	41.6223	39.7573	40.1726	23.0982	22.4452	21.845	28.4887	29.3181	29.3526	6.22856	6.38788	6.46397
TraesCS3B02G362100	0.844	5.65e-153	-0.195	1.89e-07	-2.697	0	78.5958	77.8609	77.5506	156.383	152.182	157.603	78.3293	77.8662	80.5948	17.8937	17.2583	17.1965
TraesCS2D02G396800	2.471	7.53e-153	2.772	3.73e-195	0.475	2.35e-05	3.67655	3.81854	3.96208	23.6558	23.2233	23.628	29.9238	29.7752	30.9109	7.60517	7.43501	8.07188
TraesCS6B02G323200	1.125	1.6e-152	0.336	1.79e-12	-4.919	2.77e-232	19.6311	19.2271	20.2674	47.4632	47.8471	47.7968	28.4988	28.6556	29.2706	1.0127	0.983863	0.838754
TraesCS3A02G530800	-0.324	1.78e-152	-0.208	3.67e-63	-1.2	0	1026.69	1006.28	1021.31	899.694	902.527	906.724	1020.6	1028.57	1014.16	644.279	636.726	647.771
TraesCS7D02G149200	1.579	3.1e-152	1.662	2.58e-168	-7.727	4.02e-38	15.3507	13.9911	14.3289	49.3317	47.9639	47.5638	52.5271	54.301	53.2385	0.0997462	0.0997561	0.0997057
TraesCS4A02G268900	1.155	2.23e-151	1.087	4.66e-131	-0.986	2.56e-68	22.7552	22.0367	22.7708	55.9067	55.3844	55.7405	55.2538	56.2346	54.7535	16.2735	15.744	17.4803
TraesCS1B02G320200	-2.015	3.12e-151	-0.219	0.004852	-3.385	0	185.567	188.511	187.826	55.681	53.4423	45.1584	201.113	179.986	177.939	26.8317	27.3765	23.8407
TraesCS3D02G110500	1.181	3.35e-151	1.407	4.3e-218	-0.345	1.29e-10	16.1805	16.2819	16.1173	40.9382	40.4306	40.8776	50.0757	50.4783	48.5948	18.8978	17.8829	18.7108
TraesCS6A02G412900	-0.417	3.76e-151	-0.735	0	-2.977	0	216.941	215.968	215.87	179.519	179.248	180.808	150.537	149.163	151.771	40.3177	39.6672	39.5537
TraesCS5D02G502900	0.45	6.3e-151	0.462	5.1e-157	-1.075	0	259.07	261.231	261.03	394.042	396.092	394.591	414.948	414.943	416.797	180.627	178.235	179.478
TraesCS4B02G200800	1.237	6.6e-151	1.035	3.44e-101	-0.538	1.03e-20	19.8404	19.4759	19.4863	51.266	50.8995	51.7276	47.0978	45.8139	46.6361	20.2651	19.5808	18.9252
TraesCS5A02G548200	1.48	3.09e-150	2	3.74e-287	-5.107	3.46e-102	8.35396	8.53887	8.79604	26.8207	26.2138	26.5195	39.6158	39.8656	39.5204	0.305116	0.47159	0.304992
TraesCS6B02G184100	-1.213	5.37e-150	-1.186	2.54e-140	-2.022	0	33.6978	34.0764	34.1179	16.5107	16.2479	16.045	17.5281	17.5798	16.7542	11.8458	12.0727	12.4895
TraesCS2A02G237200	-0.529	5.95e-150	-0.498	3.61e-131	-1.891	0	145.633	143.426	144.381	111.598	110.73	111.238	118.383	117.743	119.284	56.8473	56.608	56.1442
TraesCS4A02G484800	1.298	8.61e-150	1.286	5.56e-145	-0.642	7.66e-26	7.4138	7.75382	7.64944	20.0361	21.3689	20.886	21.6237	21.6258	21.1896	6.96183	6.99529	7.25374
TraesCS7A02G545200	-1.311	1.09e-149	-1.711	6.09e-204	3.454	0	76.999	76.9326	77.3646	32.8994	35.01	35.6065	27.8917	27.5594	26.386	1221.79	1227.86	1228.09
TraesCS5B02G061600	2.548	1.2e-149	-0.25	0.09459	2.929	4.41e-204	1.85338	1.91346	2.13385	12.7815	12.8816	12.6511	1.90044	1.87927	1.96464	21.6292	21.3423	22.2464
TraesCS7B02G183100	-0.664	1.79e-149	-0.785	2.63e-198	-1.41	0	187.989	190.17	193.228	134.094	135.234	131.012	129.022	126.05	128.851	104.98	103.154	103.867
TraesCS5A02G022200	-0.611	1.81e-149	-0.684	1.06e-179	-1.064	0	104.305	106.493	103.547	75.924	76.2535	76.2275	74.6832	76.15	75.7887	74.3877	72.4624	71.305
TraesCS4A02G399300	2.983	2.31e-149	3.31	3.74e-186	1.536	1.02e-35	1.46782	1.46804	1.72128	13.8518	13.9667	13.0637	18.3321	17.572	17.5962	6.56934	6.65316	6.37272
TraesCS7A02G235200	-0.827	4.12e-149	-1.076	1.97e-228	-1.987	0	18.8757	18.6651	18.9421	11.9552	11.793	11.5935	10.5235	10.1241	10.3884	6.90281	6.8793	6.89195
TraesCS2D02G101100	-0.821	4.42e-149	-0.935	1.28e-183	-3.601	0	77.9274	77.4092	78.3666	49.8513	47.3037	49.7255	47.1705	47.4592	46.9417	9.14453	9.11631	9.69393
TraesCS5D02G265700	1.823	4.57e-149	2.058	1.93e-192	-4.686	5.74e-72	4.6917	4.59258	4.83476	18.3168	19.0316	18.0918	22.2259	22.8913	22.9549	0.193034	0.265448	0.337672
TraesCS6B02G421500	-0.817	4.65e-149	-0.567	9.67e-74	-1.931	0	108.382	110.881	108.358	67.3138	70.2128	68.863	87.7153	82.6148	85.8521	39.9209	42.7766	42.0127
TraesCS4A02G333500	3.723	1.38e-148	-0.987	3.15e-05	-0.527	0.01217	1.46003	1.36705	1.27451	20.2808	20.139	19.6903	0.798834	0.632472	0.96533	1.16388	1.61457	1.35105
TraesCS4B02G174100	-1.292	2.48e-148	-1.02	1.2e-97	-0.564	5.51e-36	35.5286	38.0403	35.8873	16.1494	16.4488	17.008	20.645	20.8857	20.9748	36.2767	35.6408	35.4883
TraesCS1B02G129000	-0.445	3.79e-148	-0.546	5.54e-213	-1.395	0	110.042	110.899	110.873	90.4197	90.1828	90.0345	88.0294	88.4685	86.7839	60.8421	60.6863	61.6115
TraesCS1B02G104600	-0.793	7.5e-148	-0.753	4.14e-131	-1.343	0	46.3877	46.8754	45.8745	30.2207	29.1252	29.783	32.1801	31.7884	31.6676	26.2316	26.6795	26.7047
TraesCS7B02G197000	-0.589	1.73e-147	-0.803	1.76e-253	-1.169	0	102.699	101.732	100.501	75.8563	75.1038	74.0645	67.2338	68.1714	67.0364	65.3595	65.2062	66.2002
TraesCS6A02G068900	-0.934	3.55e-147	-0.638	3e-72	-1.425	6.81e-306	86.0421	87.8352	92.0945	51.6446	51.3673	51.5595	65.5684	66.8585	65.4633	48.7687	46.9119	48.046
TraesCS4B02G062800	-0.643	8.69e-147	-0.825	7.76e-225	-0.882	2.01e-264	112.579	113.714	111.105	81.4567	79.0491	79.4073	73.3494	74.1187	73.1371	87.6175	89.0693	88.9323
TraesCS2D02G467900	0.31	1.44e-146	0.198	2.19e-58	-2.431	0	359.707	353.413	354.157	488.345	491.836	488.532	472.239	471.254	474.427	95.7882	95.4619	95.8527
TraesCS1A02G390500	1.079	1.46e-146	1.895	0	2.278	0	23.1181	24.2227	23.788	55.7371	55.9216	55.1247	101.588	100.861	103.882	165.772	167.826	167.076
TraesCS1B02G287500	-1.369	1.8e-146	-0.757	8.01e-53	-1.263	3.94e-132	18.0205	18.3051	17.7351	7.87998	7.80766	7.55172	12.3131	12.2976	12.4315	10.3694	11.0895	11.2163
TraesCS4B02G001000	2.522	2.51e-146	3.009	2.46e-214	5.253	0	2.87078	2.77552	2.90467	18.9288	17.7118	17.8937	26.3166	26.7294	26.6946	158.292	157.459	157.534
TraesCS5D02G400800	1.727	3.78e-146	1.913	5.54e-181	-0.845	5.48e-21	3.25451	3.16531	3.4106	11.9765	12.0668	12.0779	14.6075	13.8538	14.4164	2.7255	2.60187	2.61604
TraesCS6D02G263600	3.197	5.16e-146	3.809	5.45e-212	0.133	0.4564	1.57157	1.54471	1.40996	14.9365	15.4355	15.6939	24.3585	24.0996	24.9991	2.12864	2.55462	2.52059
TraesCS2B02G398000	1.133	5.9e-146	1.307	4.81e-196	-1.953	2.48e-181	8.11209	8.21433	8.37589	19.9855	20.0248	20.1305	23.7434	24.0704	22.9757	3.18672	2.95648	3.11765
TraesCS2A02G134000	-0.29	1.07e-145	-0.616	0	-3.07	0	158.102	156.058	156.221	142.538	142.157	142.529	118.873	118.024	118.48	26.8964	27.0285	27.3543
TraesCS6D02G215000	1.115	1.62e-145	1.316	3.1e-205	0.989	4.5e-114	13.7487	14.1111	14.7594	34.3426	34.7384	33.4111	40.5703	40.66	41.6241	40.4895	41.4369	40.8599
TraesCS2A02G066800	-0.462	2.5e-145	-0.576	1.13e-224	-2.499	0	3267.66	3172	3228.66	2614.93	2577.2	2601.86	2515.53	2498.45	2498.16	808.755	815.755	856.419
TraesCS3D02G412300	-0.566	4.48e-145	-0.346	2.15e-56	0.46	4.19e-121	296.956	298.817	298.6	223.896	220.793	225.815	271.969	272.532	270.245	595.846	592.122	597.419
TraesCS7B02G042600	-0.829	1.02e-144	-1.053	2.63e-210	0.952	2.52e-279	25.6145	25.4759	26.082	15.9784	16.3941	15.8563	14.1456	14.3468	14.5697	71.8016	72.1401	72.66
TraesCS3B02G414900	1.646	1.03e-144	1.713	2.74e-156	-2.704	8.95e-97	4.9853	5.18335	5.20406	17.8451	17.6106	17.9357	19.2913	19.8697	19.2159	1.12702	1.12713	1.16989
TraesCS7D02G062900	1.059	1.35e-144	0.933	7e-109	-1.516	1.54e-153	21.731	21.1162	21.0532	49.7246	49.1255	48.9314	46.8598	48.2155	46.254	10.4279	11.0266	10.9613
TraesCS1B02G364200	5.964	1.88e-144	6.887	1.4e-193	4.509	1.2e-81	0.444639	0.234056	0.257599	21.5602	21.5901	21.7452	43.1034	42.606	42.6051	10.4367	10.7206	9.78216
TraesCS6D02G312800	-1.26	2.84e-144	-0.973	1.18e-91	-0.959	2.79e-94	24.3929	24.875	24.4894	11.3486	11.2379	11.6	14.1145	14.6711	14.7348	18.4016	18.4998	18.1534
TraesCS7D02G347600	0.982	1.26e-143	0.951	2.44e-132	-11.71	1.56e-22	17.6269	17.5408	18.0475	39.0386	38.899	38.7252	39.238	39.9646	39.9637	0	0.0214561	0
TraesCS4D02G251900	2.607	1.29e-143	1.652	2.08e-52	-0.571	5.95e-05	4.88347	5.19597	4.57489	33.5688	32.9826	32.5312	18.0355	17.5919	17.7028	4.64637	4.52124	5.14659
TraesCS3A02G360300	1.275	1.73e-143	1.16	1.68e-115	0.627	1.06e-32	7.7043	7.55109	7.21807	20.5032	19.649	20.2124	19.8029	19.3988	18.9623	17.1642	16.3856	16.8181
TraesCS3A02G107000	-2.494	1.78e-143	-1.625	1.28e-82	-4.769	4.73e-159	50.6072	49.8282	48.4552	9.8038	9.47193	10.0578	18.824	18.8258	18.2634	2.42964	2.42989	3.06222
TraesCS2D02G290800	-0.813	2.56e-143	-1.128	7.26e-245	-0.969	1.77e-198	28.8554	28.9533	28.844	18.3525	18.6279	17.7696	15.0583	15.4604	15.3933	21.2411	21.193	21.8097
TraesCS6A02G255600	2.973	5.11e-143	3.214	1.89e-168	0.415	0.00472	2.91276	2.6958	3.00176	24.84	25.3073	24.888	29.7189	31.3523	31.4447	5.09663	5.41242	6.14498
TraesCS6A02G302500	0.868	5.94e-143	0.59	1.53e-62	-2.263	0	45.3985	44.9401	44.1991	90.1679	91.1875	91.211	79.5172	77.317	77.7425	13.4159	13.2565	14.0127
TraesCS7A02G272200	-0.71	7.7e-143	-0.621	5.95e-109	-1.009	5.45e-270	86.6127	84.535	85.1777	58.9113	56.7837	58.2104	64.0023	64.7553	64.3004	61.6047	61.7311	61.4594
TraesCS1B02G459400	-0.971	8.3e-143	-0.752	5.54e-89	-0.474	1.41e-40	42.4515	42.2531	42.5489	23.9166	23.9031	24.2502	28.4133	29.9528	29.1472	44.8968	43.7182	44.3011
TraesCS6D02G199200	1.449	1.3e-142	1.59	1.91e-172	-0.179	0.01139	10.7166	10.7183	10.8611	32.8448	33.4609	31.5917	37.6195	37.77	37.2111	13.6477	14.5767	13.1786
TraesCS6B02G227900	0.917	2.63e-142	0.817	7.28e-110	-5.448	2.65e-304	38.245	39.9923	38.2089	80.5433	81.0187	82.5021	80.3245	78.7664	78.4647	1.0898	1.35299	1.42744
TraesCS3D02G268700	0.742	2.88e-142	-0.164	1.56e-06	-1.167	3.75e-226	60.871	60.096	59.8261	113.126	110.736	111.883	62.3453	62.9332	61.5742	38.0238	39.0849	39.7211
TraesCS7D02G035600	-1.043	3.27e-142	-0.458	1.37e-31	-10.362	6.44e-57	53.0135	53.4591	53.2832	28.6823	28.7763	28.6338	46.2732	44.2778	44.1518	0	0.0704931	0.105686
TraesCS3D02G258200	1.553	3.87e-142	0.638	2.22e-21	-0.306	4.32e-05	2.89986	2.89242	2.83088	9.52618	9.43127	9.12815	5.20106	5.37889	4.95657	3.55238	3.40034	3.17014
TraesCS6A02G272300	-0.801	4.01e-142	-0.751	2.16e-123	-2.762	0	95.8598	93.9675	93.3596	60.6358	59.459	60.3362	63.9304	65.381	65.5908	20.3423	20.2251	20.0163
TraesCS2D02G431500	2.865	4.3e-142	2.417	1.01e-96	7.523	0	1.71575	1.82001	1.40475	13.0093	13.5125	13.4365	9.88825	10.2514	10.4183	440.713	437.709	440.345
TraesCS2A02G037200	0.727	1.19e-141	0.09	0.009204	-0.906	2.75e-153	54.3619	55.5375	54.2091	101.448	99.7132	100.407	66.5643	67.3561	68.3142	42.7077	42.6791	41.7067
TraesCS7A02G385000	1.45	3.32e-141	1.602	2.35e-173	-0.586	4.44e-16	13.8418	13.8806	13.2267	41.2528	41.6194	41.3339	48.3487	47.9993	47.6048	12.6023	12.8699	14.1053
TraesCS7D02G314600	-1.089	6.58e-141	-0.882	1.18e-95	-1.518	5.34e-243	42.5817	41.2622	41.4663	22.38	21.5901	21.4385	26.2108	26.4362	26.1014	21.1763	21.5869	20.7281
TraesCS2B02G095900	5.24	8.15e-141	5.366	9.59e-148	-2.965	1.95e-07	0.425653	0.325549	0.551222	18.219	18.4414	17.9595	20.7112	20.8206	20.6591	0.0605227	0.0907931	0.0907472
TraesCS1D02G107000	1.179	1.35e-140	1.867	0	-0.534	7.67e-21	9.1694	9.42688	9.28778	23.1346	23.2808	23.6777	39.642	39.2858	38.8905	9.61223	9.24568	9.08635
TraesCS5A02G468400	-0.632	1.14e-139	-1.026	0	-1.642	0	67.8473	68.7295	69.3475	48.8626	49.6625	48.9946	39.6689	39.5097	37.8929	32.2215	31.3718	32.175
TraesCS4B02G067300	1.215	1.66e-139	1.19	1.37e-131	-0.326	1.71e-08	14.2362	14.1382	14.2459	37.0582	36.2073	36.5399	37.6114	37.9636	37.0244	16.9639	15.6652	16.7152
TraesCS7A02G450600	0.819	2.3e-139	-0.319	1.84e-17	-2.685	0	70.9367	70.8642	71.6109	139.168	140.856	137.805	66.4502	64.0896	67.6164	16.4214	15.3147	16.4148
TraesCS2A02G234900	0.685	3.37e-139	0.553	1.62e-87	-2.228	0	65.187	65.6014	66.8212	118.48	117.719	116.517	113.016	110.861	111.88	20.4903	20.2829	20.4471
TraesCS7A02G126600	2.761	4.15e-139	1.624	5.2e-43	2.207	3.27e-86	1.26814	1.26834	1.21957	9.3944	9.16077	9.71268	4.44692	4.58854	4.37666	8.51927	8.20161	8.43623
TraesCS3D02G516800	1.037	4.71e-139	0.631	1.87e-48	-1.295	3.6e-132	54.3968	50.0346	50.7649	118.022	117.004	118.486	92.6744	94.7826	90.7976	31.5667	28.9593	31.2505
TraesCS1D02G391000	-1.333	6.38e-139	-1.183	2.34e-111	-2.079	2.51e-262	49.0044	48.3803	48.2375	20.5435	21.5197	22.1233	24.5844	25.038	24.6765	16.6384	16.5892	16.7842
TraesCS5A02G350600	-0.165	7.77e-139	-0.909	0	-3.007	0	2668.39	2658.32	2669.09	2628.91	2645.07	2642.63	1645.9	1648.65	1638.11	480.247	484.23	479.044
TraesCS3B02G303000	0.882	1.29e-138	0.02	0.7021	-1.005	8.32e-122	41.4046	40.5531	42.7647	86.3908	85.5417	83.2651	48.6419	48.7417	49.1209	30.2393	30.6355	29.2981
TraesCS1A02G300200	1.472	2.69e-138	1.208	6.66e-89	0.41	3.39e-10	8.35982	8.292	8.04291	25.7433	24.8467	25.4628	22.6277	22.1117	21.3462	15.6982	15.6998	16.2205
TraesCS6D02G389500	-0.722	3.14e-138	-0.011	0.7734	-1.178	0	70.0651	69.2218	69.9707	47.4103	46.6534	46.7401	79.7491	79.9857	80.7463	44.7482	44.9533	44.5008
TraesCS2D02G087500	1.91	3.33e-138	2.023	2.46e-155	0.244	0.008416	4.66861	4.61965	4.87061	19.4503	20.2668	19.3363	21.7387	22.0335	22.8845	7.7734	8.46454	8.10025
TraesCS2D02G079100	3.729	3.76e-138	3.759	5.36e-140	-5.072	1.96e-11	0.767399	0.747319	0.747716	11.4613	11.0392	10.8058	12.0741	11.8372	11.5556	0.0244073	0.0244097	0.0487947
TraesCS4A02G355000	0.532	4.03e-138	-0.062	0.01563	-0.916	2.09e-297	32.3559	32.1669	32.2406	51.4118	51.8326	52.037	35.915	36.0224	35.4156	24.8496	24.6568	24.8981
TraesCS5A02G015000	0.362	4.4e-138	0.64	0	-0.043	0.006552	303.183	303.521	306.314	434.973	432.448	435.552	554.52	543.688	549.901	426.562	429.703	429.447
TraesCS1D02G087800	-0.944	6.3e-138	-0.88	1.2e-118	-1.707	0	36.3364	37.0573	37.5134	22.0918	20.9619	20.9265	23.5134	22.9362	23.3656	16.5291	16.5097	16.2695
TraesCS6B02G037000	1.942	3.27e-137	1.749	7.84e-108	-0.806	3.26e-14	1.93186	1.89038	1.78689	8.02885	8.01163	7.89073	7.28395	7.22871	7.31806	1.67856	1.4894	1.48865
TraesCS5A02G110300	-0.348	4.13e-137	-0.264	5.91e-79	-1.592	0	620.583	617.761	617.577	533.585	546.546	538.787	592.267	601.066	596.83	298.023	297.338	297.997
TraesCS5D02G496800	0.757	5.78e-137	0.28	1.93e-17	1.261	0	11.6862	11.9584	11.9422	22.3203	22.0976	22.3332	16.3841	16.9088	16.7636	41.0645	41.2502	41.4834
TraesCS7D02G352400	1.358	6.97e-137	1.844	1.84e-264	1.277	3.09e-121	7.23388	7.18086	7.27494	21.0125	20.3624	20.3433	30.3658	29.6342	30.1941	25.0294	26.1875	25.041
TraesCS7B02G179200	-0.57	2.04e-136	-0.53	1.55e-116	-1.81	0	215.107	213.64	212.981	159.297	160.175	160.366	172.896	172.04	169.602	88.006	87.3931	90.1967
TraesCS5A02G416700	1.049	3.03e-136	-0.217	2.8e-05	-1.774	4.47e-183	15.533	16.0801	16.0511	36.6969	36.6917	36.0939	15.8785	15.7794	15.8394	6.56038	6.87887	6.78463
TraesCS7D02G292000	-0.813	3.27e-136	-0.874	1.36e-150	-1.524	0	36.8419	37.9229	38.0578	23.9405	23.7838	23.548	24.0691	23.626	23.5947	19.1449	18.5403	19.2584
TraesCS1B02G121600	1.406	3.87e-136	1.658	3.28e-193	3.979	0	4.4075	4.42141	4.71515	13.1964	13.1376	13.5171	16.0537	16.7786	16.679	104.25	104.245	101.362
TraesCS3A02G130300	1.409	5.14e-136	1.189	5.84e-93	-2.018	8.44e-105	8.89367	8.69439	8.87745	26.241	26.1006	25.6707	23.1666	23.2882	23.431	2.99028	3.52942	2.96214
TraesCS4B02G109900	-0.19	1.6e-135	-0.277	8.28e-279	-2.003	0	1364.72	1356.14	1364.45	1325.7	1326.9	1323.94	1309.6	1301.1	1294.62	489.972	493.849	495.082
TraesCS2B02G012600	-0.815	1.64e-135	-0.832	2.17e-136	-0.948	1.24e-179	35.4923	35.632	35.5763	22.7935	22.101	22.4277	23.0475	23.0497	23.3367	27.0419	26.6662	26.5447
TraesCS2B02G591300	-0.885	3.79e-135	-0.906	8.04e-137	-1.554	0	32.0152	32.227	31.7709	18.9737	19.6041	19.1204	19.6698	19.5926	20.0673	16.2026	15.5968	15.6604
TraesCS7D02G349900	-1.709	7.96e-135	-1.347	6.67e-92	-2.957	2.78e-242	21.177	21.2871	21.7795	7.16845	7.32461	7.32394	9.72865	9.9013	9.61492	3.64713	3.97028	4.38769
TraesCS6A02G367000	-0.593	8.45e-135	-0.511	8.82e-100	-0.789	1.46e-230	105.829	104.792	106.097	77.7707	77.4456	77.9316	86.2909	85.0399	86.14	88.5151	89.7374	87.6805
TraesCS1A02G306600	0.469	1.57e-134	-0.156	8.35e-14	-6.221	0	176.916	174.72	176.032	268.796	270.291	271.522	183.592	181.555	183.312	3.31104	3.45855	3.49357
TraesCS4D02G176100	-1.022	2e-134	-0.661	4.39e-61	0.524	2.09e-51	41.2913	40.5242	42.3255	22.7331	22.4939	22.6154	29.5227	30.0779	31.3201	87.878	85.519	85.6316
TraesCS6A02G213100	1.938	4.91e-134	0.725	3.13e-16	0.209	0.0314	4.44626	4.12602	4.12822	18.2587	17.7155	18.0436	7.90734	8.27651	8.12896	7.39581	6.64858	7.25436
TraesCS4D02G169800	-2.288	5.21e-134	-0.374	1.88e-07	-2.352	1.48e-141	5.76516	6.00162	6.11705	1.34411	1.34457	1.37672	5.37202	5.25235	5.3604	1.62671	1.74889	1.70736
TraesCS6B02G265800	-0.964	7.46e-134	-0.837	8.36e-102	-0.79	1.68e-96	54.3948	53.8345	54.8811	30.6057	31.0755	31.1301	34.8477	34.5947	36.3251	46.4312	44.8084	45.6894
TraesCS6B02G402300	-0.554	9.68e-134	-0.363	6.14e-59	-0.728	2.98e-224	124.725	124.966	123.994	94.5905	95.2163	92.6472	112.421	112.724	111.37	109.209	110.176	107.94
TraesCS5D02G144800	1.096	1.26e-133	1.737	0	2.9	0	8.25578	8.38215	8.69259	20.2131	20.3401	19.5652	32.0923	33.0039	32.6755	90.5571	91.6076	92.2666
TraesCS5B02G146500	2.155	1.61e-133	3.047	2.9e-284	3.786	0	1.97879	1.91143	2.16631	9.87427	10.1372	9.94169	19.6437	19.0657	19.2646	40.5133	40.5173	40.2108
TraesCS7B02G086700	2.333	1.86e-133	2.355	3.14e-135	1.017	8.31e-23	9.18075	9.76648	9.60463	51.1283	53.7875	54.743	59.2899	55.0923	54.8227	28.2439	28.5494	27.0225
TraesCS4A02G190700	-4.095	2.22e-133	-1.135	3.1e-37	-11.513	8.98e-22	13.232	13.2635	13.0936	0.904076	0.904392	0.763011	7.0731	7.13695	6.66311	0	0	0
TraesCS3B02G398300	-0.246	4.68e-133	-0.239	1.02e-123	-1.978	0	529.225	522.598	527.582	491.454	494.366	492.494	516.613	515.877	517.013	194.138	194.038	193.412
TraesCS5D02G401300	1.73	4.68e-133	2.103	1.64e-201	-0.861	2.92e-20	5.21479	5.79991	5.08845	19.8729	19.2365	20.21	27.3348	25.668	27.1281	4.26274	4.21085	4.39172
TraesCS1A02G252400	1.119	5.26e-133	0.835	3.78e-70	-0.337	3.47e-10	21.3792	20.3041	21.024	50.7377	50.7259	49.7464	42.9099	42.9472	43.7054	24.0145	23.086	24.9352
TraesCS1B02G394400	-1.89	1.17e-132	-2.622	2.17e-182	-4.653	6.5e-210	83.0811	84.1239	87.0315	25.3427	25.9003	24.9103	15.6949	15.6964	16.4318	4.70247	5.1179	4.83881
TraesCS1B02G310300	1.686	1.23e-132	1.329	1.03e-77	1.648	1.33e-127	5.58678	5.58763	5.71267	20.231	20.2614	19.8385	16.233	16.313	16.6002	25.9766	25.8613	24.964
TraesCS4B02G220200	0.804	1.58e-132	0.809	2.62e-132	-0.797	7.55e-93	24.8972	23.9414	25.3116	47.8005	47.4841	48.3998	50.0389	50.806	49.5817	20.4737	20.7757	20.6652
TraesCS3D02G077400	-2.619	1.83e-132	-1.732	1.41e-78	-11.753	1.21e-22	9.53031	9.9167	9.62854	1.66918	1.63461	1.9508	3.55438	3.22086	3.35826	0	0	0
TraesCS1A02G007500	1.307	3.77e-132	0.853	3.9e-52	-0.481	1.88e-13	12.902	13.0783	13.2307	35.7417	36.228	35.7231	27.3681	27.2151	27.4635	14.1885	13.3118	13.27
TraesCS2B02G137700	-0.893	1.73e-131	-1.113	1.52e-185	-2.175	0	87.1754	86.0619	87.2351	52.5285	51.6664	51.5416	46.2336	46.9536	46.2818	27.8909	28.1963	27.6275
TraesCS5D02G451300	-0.703	1.92e-131	-0.658	8.73e-114	-2.119	0	93.3479	93.6245	94.2282	64.2693	63.0624	64.4535	69.1149	68.3099	68.9327	30.9163	32.3633	30.6574
TraesCS4A02G067700	1.354	2.15e-131	0.414	2.89e-11	-2.617	2.35e-154	4.35476	4.41727	4.40194	12.7193	12.5966	12.0534	6.55892	7.0139	6.74871	0.950142	1.13174	1.03513
TraesCS5A02G083100	-1.361	2.95e-131	-2.537	5.92e-278	-2.779	0	33.4523	33.9717	33.7476	14.6432	14.4163	14.676	7.00014	6.48224	6.70897	7.3111	7.31182	6.76002
TraesCS3B02G563500	-1.242	5.42e-131	-0.621	2.59e-37	-4.716	0	26.5755	26.6312	25.8536	12.747	11.6132	12.7338	19.4441	20.4413	19.6298	1.43444	1.24747	1.68323
TraesCS4A02G267000	-0.563	6.52e-131	-0.64	8.63e-163	-1.693	0	74.2423	74.9597	73.5591	55.5705	55.9749	55.8636	56.3989	54.7137	54.3861	32.904	33.7103	33.3588
TraesCS5B02G387300	1.121	6.52e-131	1.329	1.66e-186	-0.415	5.1e-14	9.66192	9.80621	9.58916	23.3773	23.3551	23.4442	28.2866	28.2554	27.9827	10.316	10.7389	10.5609
TraesCS5B02G362500	-2.618	9e-131	-1.606	1.13e-70	-8.236	4.97e-43	28.0161	29.4981	28.0922	5.06662	5.0684	5.3404	10.7774	10.6567	11.1436	0.0686819	0.137377	0.205962
TraesCS4A02G472500	-0.277	1.32e-130	-0.324	1.31e-172	-2.245	0	466.889	464.892	468.511	428.706	427.653	426.321	431.935	431.903	432.042	144.532	143.029	141.076
TraesCS3B02G382500	-1.591	1.64e-130	-1.198	2.87e-82	-0.975	5.36e-62	15.2968	15.8794	15.3267	5.6175	5.71219	5.80439	7.68743	8.16481	7.62583	11.4759	11.4771	11.3778
TraesCS3D02G536300	-0.275	2.26e-130	-0.269	1.69e-122	-1.186	0	1040.37	1033.46	1025.16	946.918	950.094	945.641	992.169	989.142	996.683	657.068	658.617	660.695
TraesCS4D02G329500	-0.872	2.29e-130	-0.54	3.48e-53	-4.141	0	90.7357	94.041	92.0132	56.4137	55.6068	55.8271	75.2665	72.7969	72.4594	7.90747	7.15058	7.71494
TraesCS5D02G303000	-0.826	3.39e-130	-0.864	1.87e-137	-2.469	0	46.1022	45.401	46.6426	29.1052	28.6974	28.7296	29.689	28.4661	29.769	12.1577	12.1369	11.9114
TraesCS6A02G212200	0.808	4.3e-130	0.554	4.34e-58	-0.922	3.14e-117	43.5104	42.4362	43.4548	83.807	84.6818	83.0378	73.465	74.5083	71.9773	31.7238	33.6175	33.7379
TraesCS2B02G226100	1.932	6.12e-130	1.229	5.79e-48	-0.245	0.01836	6.03906	6.14353	5.97413	25.9702	25.0857	25.8446	16.2322	16.6406	16.4183	7.88269	7.00753	7.33752
TraesCS5B02G153200	1.115	7.32e-130	1.18	1.71e-144	-0.569	9.08e-25	5.24439	5.35887	5.33735	13.0129	12.5892	12.736	13.848	13.7537	14.2144	5.21001	5.35772	5.02155
TraesCS7B02G248500	-1.027	8.44e-130	-1.123	4.47e-147	-2.612	0	25.1368	25.9764	25.1951	13.5002	14.2275	13.8321	13.6208	13.1084	13.8567	5.9436	5.8614	6.30527
TraesCS1A02G313300	-0.244	1.08e-129	-0.347	4.7e-250	-2.443	0	482.734	482.959	481.404	450.767	452.263	452.981	437.934	439.209	440.755	131.021	127.479	127.688
TraesCS4D02G085000	1.219	1.23e-129	1.564	5.64e-221	2.636	0	5.67732	5.72821	5.63115	14.3981	14.9788	14.6416	19.1872	19.4705	19.671	51.0387	51.5275	51.0784
TraesCS3A02G528800	-1.52	1.48e-129	-1.01	8.84e-65	-4.569	5.92e-281	17.2396	17.069	16.3672	6.64416	6.34739	6.62926	9.83927	9.39463	9.91427	1.0889	0.81676	1.19312
TraesCS1B02G037100	1.03	3.83e-129	0.152	0.00324	-0.723	8.54e-45	27.3545	27.2265	26.2161	60.0181	61.0212	62.0611	34.8671	34.6227	34.4449	23.4778	23.52	24.027
TraesCS4A02G251600	-0.539	7.17e-129	-0.634	1.54e-170	-0.587	1.01e-153	140.445	137.792	140.188	106.925	106.309	106.541	103.962	104.459	103.835	137.055	132.037	135.171
TraesCS4D02G238700	-2.024	1.29e-128	0.39	3.25e-10	-9.992	7.07e-22	10.9156	10.6496	10.8657	2.93228	2.8783	3.04302	16.4273	16.5928	16.1827	0.0231042	0.0231065	0
TraesCS7A02G305200	1.268	1.74e-128	1.218	4.09e-116	0.667	1.49e-33	11.9158	11.5756	12.3451	31.673	31.6841	32.4631	32.2428	32.556	31.766	27.7537	26.9298	27.9013
TraesCS6B02G409800	-0.457	2.17e-128	-0.613	4.8e-218	-1.563	0	175.83	176.511	174.22	141.255	143.478	141.157	133.085	133.799	131.743	85.9462	86.5197	86.109
TraesCS5A02G383800	-1.862	2.73e-128	-2.22	2.62e-152	-3.189	1.68e-215	13.954	13.9962	14.2244	4.38226	4.36457	4.13346	3.41561	3.39446	3.67366	2.37463	2.22947	2.10724
TraesCS2D02G319800	-1.097	3.96e-128	-1.242	2.15e-153	-3.451	0	69.3738	69.9304	69.8415	35.629	38.0578	34.8328	34.1964	34.1548	34.064	9.69393	8.88276	9.18267
TraesCS3A02G424000	-0.837	5.67e-128	-0.662	6.09e-82	-0.538	7.15e-59	97.2141	99.8737	100.824	61.9168	62.2393	60.9872	71.7467	73.8189	72.5205	99.2376	97.8932	100.605
TraesCS5B02G268100	3.592	6.09e-128	2.531	2.45e-59	3.823	3.51e-147	1.00109	1.20739	1.00178	14.2548	14.401	14.315	7.12994	6.94133	7.41443	22.0276	22.1366	21.7697
TraesCS3D02G249000	-2.383	6.43e-128	-1.485	5.79e-68	-2.39	6.62e-132	10.0055	9.76019	9.74639	2.11136	2.00285	2.16652	4.21096	4.15034	3.84508	2.86827	2.82266	2.47718
TraesCS5A02G475600	1.366	8.03e-128	0.53	2.45e-17	-3.582	2.26e-149	13.7085	13.3288	13.877	38.542	39.379	39.1314	22.2199	23.449	22.7668	1.8836	1.61468	1.46016
TraesCS3B02G441000	0.879	9.91e-128	0.893	3.95e-130	-1.962	6.11e-277	21.5377	21.0674	21.3629	43.4931	43.1813	43.9221	46.134	46.3009	45.1428	7.9671	7.945	7.9181
TraesCS3B02G413700	-0.237	2.58e-127	-0.441	0	-2.597	0	562.7	559.626	560.934	527.332	528.444	529.282	477.562	478.162	480.547	135.007	134.813	133.914
TraesCS7B02G006600	-0.509	3.29e-127	-0.701	2.77e-225	-1.921	0	136.684	136.571	137.804	106.916	107.146	106.623	96.2892	98.7366	97.8022	53.6185	52.3567	51.4949
TraesCS1B02G200600	1.339	3.64e-127	1.221	5.52e-103	-2.145	3.31e-122	14.2859	14.8426	14.72	41.3996	39.4434	42.2547	39.2109	39.8789	39.2488	4.76979	4.84911	4.76786
TraesCS1B02G476400	2.995	4.07e-127	3.535	3.96e-181	-3.767	2.91e-21	1.0277	0.901629	1.13666	8.86715	9.21606	9.04232	13.5229	13.7368	13.9104	0.130745	0.0871718	0.10891
TraesCSU02G029700	2.438	5.33e-127	0.371	0.005198	0.874	1.2e-14	1.16415	1.01478	1.01532	6.37889	6.34015	6.49319	1.522	1.5336	1.72812	2.8527	2.74971	2.89025
TraesCS3D02G134700	-1.257	7.42e-127	-0.849	1.05e-63	-5.314	9.69e-289	41.6533	42.0181	41.0361	19.3132	19.3199	19.2838	27.2314	26.5811	26.3884	1.51632	1.42982	1.60232
TraesCS4D02G084900	2.239	8.42e-127	2.438	1.34e-151	3.022	2.83e-245	2.84052	2.37901	2.6807	13.5715	14.0414	13.7743	16.2817	16.902	16.3819	31.9859	29.4769	31.6382
TraesCS6D02G186800	-0.637	1.09e-126	-0.955	3.65e-269	-1.707	0	92.814	98.3772	99.1204	69.2047	68.7796	69.3053	57.9276	58.2503	57.2581	43.1682	43.0234	42.8677
TraesCS7B02G013200	1.447	1.23e-126	2.591	0	5.199	0	11.5718	11.2735	12.1802	35.2533	34.5669	36.2076	81.7409	81.06	81.5633	622.309	624.288	620.659
TraesCS5A02G382900	1.389	1.35e-126	1.657	2.45e-183	0.577	1.44e-20	6.38271	6.48165	6.74646	19.7185	18.2225	19.0818	23.5077	23.4225	24.6814	14.0669	14.3446	14.0415
TraesCS4A02G247600	0.882	1.54e-126	0.988	8.45e-159	-0.605	6.51e-44	39.0973	37.627	39.2682	78.8983	79.7545	78.6425	89.2996	88.5754	88.5347	37.5934	36.0306	37.0563
TraesCS4D02G319100	1.202	1.98e-126	1.382	5.06e-169	1.303	1.91e-152	7.05935	7.34345	7.01948	18.247	18.1677	18.2946	21.6545	21.2257	21.7838	25.5057	25.7783	25.4054
TraesCS4B02G172500	1.197	2.66e-126	0.526	4.3e-22	0.155	0.007776	17.6149	18.0355	17.9808	46.0696	45.4076	45.0027	28.9652	29.7947	30.6551	28.4375	30.0333	28.1541
TraesCS5A02G045700	1.172	3.29e-126	0.191	0.001148	-2.674	9.93e-200	10.7466	9.96864	10.5714	26.0108	26.4175	25.8107	13.7714	13.6128	13.9857	2.40523	2.32529	2.38422
TraesCS5A02G220200	1.975	5.05e-126	-0.272	0.01786	-4.55	4.56e-57	2.55197	2.44078	2.62349	10.9225	11.274	11.0456	2.40565	2.60015	2.30122	0.202249	0.151702	0.117931
TraesCS2B02G275500	-2.178	6.29e-126	-1.852	4.96e-100	-1.884	4.34e-109	20.1217	20.2733	20.0984	4.66243	4.94889	5.23323	6.24522	6.763	6.40481	7.85209	8.03237	7.89376
TraesCS1A02G281000	1.117	6.77e-126	1.511	1.09e-239	0.15	0.00558	17.0236	16.971	15.9291	40.2178	40.6824	39.2741	54.6915	55.4372	54.6956	26.8874	26.9569	26.5426
TraesCS3A02G364300	3.101	1e-125	2.501	3.54e-78	-0.881	6.76e-06	4.98519	5.68399	5.3877	49.9906	50.0081	52.9674	35.2539	35.0437	34.9361	3.61505	4.21798	4.81812
TraesCS4A02G268500	0.663	1.01e-125	0.687	3.13e-133	-0.312	5.75e-24	33.1237	33.532	34.0178	59.5061	58.568	58.9028	62.5156	63.1957	62.0019	38.7468	39.3939	39.5299
TraesCS2B02G079300	-0.284	1.18e-125	-0.416	4.89e-263	-3.066	0	1520.66	1507.01	1506.38	1376.99	1372.81	1384.48	1310.08	1297.32	1328.44	256.542	260.44	268.766
TraesCS4B02G056700	0.643	1.34e-125	-0.291	1.39e-21	-2.359	0	60.5854	60.0052	59.9388	104.557	104.924	103.43	57.4953	56.2114	57.1574	17.0073	17.3355	16.7334
TraesCS4A02G303900	2.179	1.66e-125	-0.866	2.46e-11	-6.707	3.73e-24	2.78867	2.42688	2.66374	13.3152	12.9551	13.336	1.68802	1.72699	1.59113	0.0437712	0.0218878	0.0437534
TraesCS5A02G053100	1.107	3.27e-125	1.01	3.73e-101	0.258	5.69e-07	11.4584	11.3848	11.2777	26.9024	27.2914	27.3792	26.6751	26.8191	26.0713	19.7935	19.7955	19.6261
TraesCS1A02G301400	-0.611	3.38e-125	-0.567	1.52e-106	-1.827	0	69.2542	68.7724	68.9997	50.179	50.1966	50.0701	52.7307	53.859	55.2361	28.6167	27.6214	28.4132
TraesCS7B02G137200	1.03	3.77e-125	1.012	7.01e-119	-2.572	8.7e-245	14.5003	13.8041	14.547	32.3657	32.3241	32.4445	33.3183	32.908	33.8722	3.4206	3.59865	3.44142
TraesCS4A02G083900	0.704	4.09e-125	0.918	4.27e-216	-0.041	0.2552	22.6373	22.7076	22.7731	40.8033	41.3942	41.0188	50.0139	49.2312	49.7742	32.2207	32.1593	31.7071
TraesCS3D02G310300	-1.985	4.19e-125	-1.85	3.11e-110	-5.144	2.25e-164	10.9452	11.2572	10.7975	3.04049	3.15727	3.05781	3.67524	3.38008	3.54623	0.416642	0.479186	0.45812
TraesCS2D02G136200	-0.292	5.17e-125	-0.544	0	-2.158	0	140.946	140.894	139.571	126.654	128.059	127.456	110.905	111.433	112.442	45.7432	45.5502	45.7337
TraesCS5D02G002500	-0.724	5.63e-125	-0.802	7.33e-147	-0.974	6.21e-216	59.2398	57.4572	58.868	39.2754	39.1173	39.5775	39.3281	38.5449	38.736	44.6426	41.7889	43.2611
TraesCS2A02G593000	-1.3	6.02e-125	-1.355	1.08e-129	-1.964	1.64e-233	18.1519	17.8244	17.308	7.90213	8.39445	7.7314	7.73791	8.1248	8.25332	6.53252	6.56947	6.71126
TraesCS5D02G108700	0.553	1.02e-124	-0.151	9.97e-09	-1.34	0	113.293	114.282	114.1	184.634	186.395	185.38	118.343	119.916	118.017	65.4442	65.8281	64.5377
TraesCS5D02G517200	0.551	1.81e-124	0.014	0.6733	-0.98	7.91e-278	26.6393	26.4832	26.1047	43.1784	42.7328	42.9823	30.9798	30.7426	30.9478	19.219	19.3467	19.7045
TraesCS2A02G365600	-0.526	1.89e-124	-0.891	0	-0.599	4.84e-161	78.5388	79.3613	79.2944	61.6095	60.7493	60.4598	49.5731	48.9935	49.5935	75.8997	76.1898	75.1159
TraesCS1A02G030100	1.346	2.34e-124	0.349	9.67e-08	-0.402	4.89e-09	6.43024	6.49176	6.22268	18.2181	18.0213	17.802	9.61335	9.56566	9.06284	7.24127	6.67507	7.11039
TraesCS7D02G315500	0.969	2.61e-124	0.962	3.23e-120	1.117	1.45e-170	17.6795	17.8149	17.138	37.992	37.7507	38.6596	39.1901	39.5022	40.0229	54.9293	55.6836	54.9872
TraesCS5D02G044400	-0.229	4.44e-124	-0.47	0	-2.183	0	713.518	713.278	712.68	672.928	677.202	676.448	595.037	599.559	594.383	224.863	231.693	227.049
TraesCS6D02G219900	-1.189	4.62e-124	-1.118	7.3e-109	-0.818	2.24e-67	38.7106	37.3405	36.7971	18.5256	18.1722	18.2605	20.0016	20.5062	19.7015	31.5556	30.6517	30.674
TraesCS7D02G089300	2.088	4.68e-124	0.86	3e-18	-1.418	5.63e-26	2.44092	2.4936	2.47748	11.7839	11.4871	11.7033	5.13735	5.36206	5.08169	1.36968	1.34874	1.30594
TraesCS3D02G413900	-0.538	5.41e-124	-0.377	4.56e-62	-1.854	0	176.366	174.346	176.931	135.78	133.406	134.245	155.301	156.889	158.384	71.5054	70.4403	69.7864
TraesCS2B02G347800	-1.53	6.37e-124	-1.018	1.01e-62	-3.396	2.86e-274	17.6469	17.8345	17.659	7.05072	6.83647	6.54034	10.4116	9.81826	10.1702	2.30908	2.65695	2.35779
TraesCS1A02G396900	2.251	8.2e-124	2.327	4.69e-132	1.091	2.76e-26	4.35753	4.19826	4.32051	22.6504	22.735	22.6562	25.0154	25.0179	24.8031	13.3353	12.8534	13.6197
TraesCS4D02G309300	-0.893	9e-124	-0.827	2.85e-105	-1.521	4.99e-301	67.2286	65.4252	65.1961	40.5229	38.9244	38.8576	43.4887	43.0337	42.6794	33.4334	33.4766	33.1012
TraesCS7A02G282100	-0.566	1.02e-123	-0.57	3.8e-122	-1.653	0	202.192	204.784	202.507	151.327	152.989	152.594	157.111	159.351	159.111	94	91.5003	95.6693
TraesCS5D02G066100	2.823	2e-123	0.134	0.4853	2.806	6.4e-123	1.57903	1.43785	1.53295	12.1555	11.6173	11.9553	1.81815	2.04562	1.91931	15.4097	15.8386	14.9194
TraesCS4B02G213400	-1.174	2.93e-123	-0.975	5.12e-88	-0.634	6.68e-44	27.9496	27.7592	28.1878	13.5256	13.7403	13.9956	16.2638	16.5	16.656	26.5475	26.1973	25.6845
TraesCS2A02G081300	3.6	6.82e-123	3.828	1.11e-139	-4.006	1.79e-13	0.921374	0.78987	0.636623	10.5366	10.4771	10.5814	12.7164	13.2114	12.6939	0.132568	0.0530324	0.0265028
TraesCS1D02G042100	2.242	6.96e-123	2.494	5.43e-154	2.537	2.14e-162	1.92398	1.87033	1.99727	10.0326	10.4155	9.96626	12.4075	12.8519	12.5241	16.4946	16.7135	15.5538
TraesCS2D02G131900	-0.553	8.21e-123	-0.411	5.51e-69	-1.157	0	67.2121	67.542	68.5661	51.8071	51.0313	51.0405	58.8048	59.4331	58.8248	44.0389	43.7273	44.5825
TraesCS2A02G342600	-0.219	2.77e-122	-0.6	0	-3.246	0	875.28	874.535	874.175	837.219	832.137	833.088	669.907	670.709	664.863	135.885	132.146	133.274
TraesCS2A02G517900	-0.682	3.11e-122	-0.692	3.19e-122	-2.127	0	62.162	61.8989	61.9123	43.0897	42.8806	42.6712	44.2573	45.4302	43.6346	20.6651	20.7143	20.4215
TraesCS7D02G419300	1.691	3.21e-122	0.435	3.39e-07	2.284	8.99e-238	5.41111	5.13376	5.76906	19.1987	19.5207	19.7614	8.18204	8.58927	8.77873	37.8333	39.2124	38.2762
TraesCS2A02G214200	-1.001	3.35e-122	-0.479	6.46e-32	0.401	4.41e-28	40.5485	39.6817	42.085	22.34	22.1956	23.2842	34.8877	33.5873	33.1897	77.7459	78.0414	78.5452
TraesCS2A02G022700	-0.801	3.84e-122	-0.755	4.91e-107	-2.06	0	72.5753	75.4961	74.0497	46.879	47.5187	47.0988	50.4048	51.3383	50.6738	25.5475	26.0738	25.6493
TraesCS2D02G401000	-3.415	8.28e-122	-2.452	4.79e-95	-3.984	6.01e-126	3.70513	3.69668	3.64452	0.406195	0.345819	0.397655	0.734103	0.792136	0.811437	0.359548	0.326894	0.326729
TraesCS2B02G290500	-0.501	8.95e-122	-0.742	6.51e-247	-1.642	0	58.8165	59.2592	59.1654	46.1234	46.0656	46.8837	40.193	41.1676	41.3525	27.3441	27.8477	27.1934
TraesCS7D02G235100	-0.908	1e-121	-0.436	1.81e-31	-2.084	0	59.3917	59.7487	60.2235	36.0485	35.6668	34.4201	51.133	51.9174	50.4929	20.7545	20.8712	19.7527
TraesCS3D02G109100	-1.564	1.06e-121	-0.813	2.73e-40	-2.9	9.84e-248	19.6301	19.4461	19.9008	7.86368	7.10444	7.17101	13.3711	13.0468	12.4706	4.03888	3.75681	3.67022
TraesCS6D02G163700	-1.285	1.33e-121	-1.073	6.28e-88	-1.863	1.17e-213	31.4397	31.5609	32.4508	14.1642	14.5596	14.7535	16.9525	17.7021	17.8887	12.3379	13.3586	12.368
TraesCS3D02G080700	2.086	1.52e-121	-0.562	3.59e-06	-6.37	4.83e-30	6.79453	6.59802	5.65281	29.5014	29.9664	30.2667	4.82522	4.95269	5.16422	0.0954866	0.0954961	0.143172
TraesCS1A02G400500	1.179	1.71e-121	-0.953	1.16e-50	-3.678	6.97e-227	18.249	18.465	17.5417	45.0784	45.5284	45.8053	11.418	10.0203	11.0192	2.18947	2.09308	1.86673
TraesCS4D02G098400	-0.961	2.1e-121	-0.324	1.12e-16	-0.124	0.00121	23.1718	23.3972	22.6697	13.0423	13.2454	13.2016	21.6433	21.1858	21.2487	30.9184	30.0457	31.2096
TraesCS5A02G425000	1.969	2.23e-121	1.319	4.13e-50	-1.622	5.16e-34	4.32482	4.24438	4.11139	18.4503	18.4826	18.1699	12.4826	12.1942	11.9622	2.05812	1.99298	1.92666
TraesCS4D02G315900	1.061	2.3e-121	0.26	4.94e-07	-2.873	1.14e-244	15.818	15.671	15.9143	36.0182	37.1976	36.6006	21.7976	22.2572	21.6848	2.88957	3.3801	3.1205
TraesCS2D02G033700	-4.26	5.16e-121	-0.06	0.5784	-11.399	2.32e-21	47.4078	47.6464	48.4816	3.32554	2.77225	2.2176	56.6192	51.9164	50.9239	0	0	0
TraesCS2A02G026600	2.462	7.87e-121	2.867	1.14e-167	4.777	0	1.83716	1.62624	1.52145	10.2841	10.0042	10.2057	13.8471	13.9616	14.3007	66.9687	66.1331	65.2323
TraesCS5D02G392300	1.227	1.44e-120	1.485	2.99e-180	-0.143	0.02674	9.13391	8.63902	8.53327	22.693	22.6656	22.9808	28.1984	28.5951	28.4959	11.7722	10.8626	11.945
TraesCS6A02G018000	0.735	1.49e-120	1.343	0	2.214	0	26.0988	26.1976	26.0977	48.2603	48.8043	47.8001	76.3177	78.0718	75.9375	175.49	176.264	175.992
TraesCS2D02G351900	0.69	1.62e-120	0.849	2.58e-183	-0.965	5.78e-168	52.4916	55.0522	52.0855	95.6579	95.6207	94.6707	108.937	111.183	112.784	38.9722	39.599	40.1127
TraesCS7D02G183300	1.97	1.85e-120	2.014	3.63e-125	1.147	6.56e-38	5.9219	5.61513	5.38724	24.8839	23.9707	24.7429	26.4931	25.6716	26.9896	17.893	18.592	17.8857
TraesCS1D02G400100	-0.214	2.22e-120	-0.332	6.07e-279	-2.066	0	1228.59	1232.25	1233.37	1181.05	1172.1	1183.61	1135.97	1124.42	1137.75	428.499	425.557	426.181
TraesCS1A02G349900	5.471	2.73e-120	6.227	8.3e-157	3.353	1.31e-43	0.262213	0.357618	0.333955	15.5627	15.751	15.6353	27.5336	27.6895	27.5356	4.55198	4.78294	4.80932
TraesCS1D02G352600	5.321	1.06e-119	5.905	3.47e-148	3.592	3.71e-53	0.291263	0.339859	0.412905	16.1487	14.6181	15.5478	24.9405	23.6945	23.798	5.72032	6.36632	6.18717
TraesCS6B02G004400	-0.564	1.77e-119	-0.453	2e-77	-1.879	0	106.152	104.382	103.98	78.683	78.5129	78.9447	88.8721	87.5074	89.7371	40.6348	42.0221	41.4479
TraesCS1A02G251200	0.538	1.78e-119	0.199	8.23e-16	-0.977	2.16e-286	102.643	102.24	102.294	163.379	165.769	165.995	139.04	133.691	135.545	75.5276	75.9069	75.0578
TraesCS3B02G398000	-0.813	2.69e-119	-0.908	8.28e-144	-3.703	0	40.3492	40.7987	40.0441	26.4326	24.5819	25.5574	25.4103	24.1778	25.1984	4.27254	4.40691	4.81972
TraesCS3D02G374200	-0.257	2.78e-119	-0.533	0	-2.886	0	551.596	556.241	551.922	514.052	512.057	516.163	442.917	443.698	441.858	107.963	109.052	108.874
TraesCS5D02G145400	1.099	3.46e-119	0.705	5.64e-46	-6.6	3.37e-112	19.9625	21.3269	19.7946	48.1342	48.2091	48.9007	38.2739	38.148	38.8926	0.328999	0.329032	0.255785
TraesCS4B02G319300	1.016	3.72e-119	0.156	0.003009	-1.328	2.14e-118	16.569	17.8149	16.9271	38.2751	39.0702	37.855	21.7931	21.8826	22.5154	9.68011	10.1245	9.84853
TraesCS2D02G504900	-0.692	6.82e-119	-0.572	7.96e-82	-2.294	0	123.949	125.723	124.125	86.6126	85.7437	84.4887	93.5945	99.0487	98.4954	35.605	38.2408	36.7234
TraesCS4B02G318000	2.855	7.04e-119	3.672	7.3e-204	-0.833	5.48e-06	1.42655	1.22613	1.316	10.4494	10.4531	10.9651	19.2975	20.1354	19.1556	1.0237	1.13157	1.07714
TraesCS6D02G254000	-0.614	7.07e-119	-0.567	2.93e-100	-1.487	0	68.876	67.4361	68.3498	49.0893	49.4155	49.9088	52.7929	53.2585	53.8904	35.6819	35.8585	34.4345
TraesCS2B02G530100	-0.615	1.16e-118	-0.495	2.63e-77	-1.58	0	69.0237	68.9955	69.2649	49.6428	50.3104	50.2501	56.4798	56.9212	56.9822	34.324	32.9225	33.3739
TraesCS7D02G311300	0.348	1.33e-118	0.314	2.14e-94	-0.947	0	335.801	335.486	337.501	472.753	474.785	477.945	479.435	485.58	487.182	252.402	252.16	254.828
TraesCS4A02G264800	0.599	2.9e-118	0.255	2.57e-20	0.203	8.24e-14	22.4402	22.0801	21.6068	37.2101	37.0654	36.9043	30.2846	30.7234	30.3517	36.4508	36.6951	37.2829
TraesCS1A02G403800	0.379	3.42e-118	-0.522	2.1e-185	-2.54	0	276.668	278.371	280.213	401.118	403.773	400.998	224.511	225.173	223.852	67.6143	70.952	69.8331
TraesCS3A02G044400	-1.338	3.51e-118	-2.163	2.56e-222	-4.698	1.84e-301	24.3136	24.3174	23.7866	10.7213	10.3343	10.7458	6.40371	5.96768	6.35567	1.45012	1.28608	1.31278
TraesCS3D02G332200	1.86	3.72e-118	2.847	4.35e-301	5.056	0	2.66409	2.91191	2.60879	11.0917	11.0591	10.8391	22.9787	22.512	22.7154	131.621	132.347	131.062
TraesCS1A02G180000	2.196	7.29e-118	1.994	1.18e-94	-2.035	5.08e-34	6.40207	5.93831	6.50979	32.1232	30.847	32.9236	28.7663	27.8839	30.3175	2.18398	2.37141	2.12072
TraesCS3D02G536700	0.711	8.06e-118	0.861	1.38e-173	-1.489	0	309.827	293.151	287.401	534.78	541.031	542.194	622.39	629.226	621.081	149.103	155.402	155.663
TraesCS7A02G034300	1.636	8.79e-118	2.615	0	4.479	0	4.10154	4.29346	4.18941	14.5466	14.4906	14.3874	30.3074	29.354	29.6265	134.921	134.626	137.818
TraesCS3D02G417500	1.024	1.23e-117	2.104	0	3.256	0	9.41014	9.69775	9.51203	21.5476	21.4332	21.6446	46.854	48.2553	47.3344	132.327	130.899	133.464
TraesCS3D02G027300	1.5	1.39e-117	1.224	1.35e-74	-0.057	0.5187	5.89419	6.06534	6.04728	18.7879	19.1618	18.5887	16.2789	15.9384	16.5081	8.48671	8.33324	8.30332
TraesCS5B02G202100	-1.835	4.65e-117	-0.937	4.35e-40	-3.38	1.29e-200	16.016	15.46	16.4842	4.93964	5.08742	4.89224	9.49143	9.90034	9.62813	2.33141	2.11689	2.23848
TraesCS3D02G343900	-1.172	5.46e-117	-0.692	1.59e-46	0.243	1.84e-08	19.6788	19.8122	19.9347	9.46858	10.1331	9.66758	14.0968	14.5375	13.9581	33.8062	33.787	34.4679
TraesCS2D02G254500	-0.775	9.41e-117	-0.573	1.22e-65	-2.744	0	58.9005	60.4632	57.4958	38.8472	38.0005	37.8921	46.0903	45.1569	46.4454	12.9046	12.615	12.7936
TraesCS1A02G281700	1.436	1.17e-116	0.623	1.13e-19	-2.199	2.27e-94	8.86764	8.92324	8.95512	27.0116	26.3449	26.9666	15.8357	15.8373	16.0403	2.85142	2.68781	2.91578
TraesCS2B02G236600	-1.596	2.48e-116	-0.304	1.08e-06	-7.591	7.3e-84	8.9316	8.82801	8.44766	3.21935	3.18692	3.22018	8.33312	7.9716	8.28377	0.0281846	0.0986559	0.0704329
TraesCS1D02G408300	1.371	3.19e-116	-0.874	7.73e-30	-3.519	1.15e-149	13.2051	12.2267	12.5506	36.7347	36.9411	35.4171	7.785	8.03293	8.18722	1.4287	1.60309	1.77645
TraesCS6A02G354400	0.36	3.58e-116	-0.219	7.52e-39	-1.03	0	47.8241	47.8004	47.9914	67.8701	68.1368	68.552	47.298	47.1088	48.4705	34.1177	33.9898	33.9789
TraesCS4D02G314400	3.29	3.73e-116	4.169	3.57e-192	-0.551	0.009957	1.03174	0.74648	0.900646	9.72276	9.59985	9.76737	18.2522	18.7951	18.7711	0.822462	0.928679	0.901689
TraesCS3A02G129000	1.053	4.32e-116	0.735	7.2e-53	2.036	0	3.79137	3.63138	3.68892	8.37052	8.69322	8.52663	6.98673	7.18592	7.2453	22.1351	22.0999	21.8799
TraesCS7D02G146300	1.577	6.73e-116	1.856	1.1e-163	0.554	3.02e-13	4.11185	3.80364	3.7406	13.01	12.7028	12.9043	16.1428	16.5275	16.1962	8.09273	8.36856	8.36433
TraesCS3A02G534900	1.645	9.26e-116	-0.624	6.02e-11	-2.002	5.92e-65	5.47568	5.65535	5.56889	19.1765	19.4833	19.3315	4.19075	4.09536	4.26291	2.07991	2.16116	1.80906
TraesCS3B02G477300	-0.412	2.39e-115	-0.358	2.56e-86	-1.522	0	238.067	240.839	239.252	198.466	200.034	200.794	216.728	214.946	217.453	119.871	120.391	122.546
TraesCS4D02G088200	-0.444	4.01e-115	-0.23	2.81e-32	-2.62	0	62.2089	62.9657	63.0262	50.8265	51.3105	51.4181	62.2469	61.4523	62.0779	14.7759	14.6033	15.0419
TraesCS7A02G226300	1.292	4.65e-115	-0.26	0.0002893	-8.346	3.47e-37	16.7056	16.3777	16.6803	44.7023	45.7742	44.749	16.326	16.1309	15.6584	0.0887488	0.0443788	0.0887128
TraesCS3D02G240800	0.593	5.02e-115	-0.254	4.19e-18	-1.797	0	95.4774	95.849	95.2928	160.037	159.579	160.317	92.6642	92.3291	93.3978	38.0907	40.8987	40.7056
TraesCS5A02G468600	0.571	7.92e-115	-0.214	2.77e-14	-1.896	0	100.725	101.527	101.992	167.697	167.69	166.362	99.9662	100.563	103.238	40.2062	39.2587	39.1562
TraesCS3D02G430000	0.295	8.4e-115	0.668	0	-1.292	0	250.101	253.226	252.846	344.028	342.401	343.623	464.385	462.731	464.35	148.766	148.444	150.958
TraesCSU02G269900	-1.559	1.46e-114	0.222	0.000188	-3.723	6.34e-241	66.3379	62.8236	66.5596	25.5064	24.5859	23.6544	86.3713	88.9287	89.1154	7.55973	6.7086	7.23737
TraesCS7B02G215000	0.338	1.53e-114	0.325	4.73e-104	-1.253	0	340.054	335.866	341.313	474.912	472.684	479.886	491.368	493.102	491.295	204.916	205.886	208.715
TraesCS1A02G153000	1.824	1.71e-114	0.785	7.79e-19	-1.176	9.51e-26	2.43379	2.59121	2.60568	10.186	9.90089	9.89998	5.35569	5.1459	4.72514	1.56562	1.67649	1.65984
TraesCS5A02G166400	0.794	2.22e-114	0.565	2.62e-55	-0.695	3.22e-65	16.2792	17.1112	17.4176	32.1032	33.1829	32.527	29.1021	28.9192	29.038	15.3809	15.0682	15.1054
TraesCS5A02G391000	1.38	5.31e-114	1.333	2.29e-104	0.029	0.7323	2.85958	2.73326	2.71094	8.1028	7.83215	8.05931	7.81695	8.07236	8.3353	3.96349	4.1458	4.18198
TraesCS6D02G356700	2.803	5.46e-114	2.333	6.48e-76	-1.066	1.2e-08	4.99086	5.68013	5.68315	41.6595	43.7371	41.2576	30.5181	32.273	32.6411	4.47195	3.01627	3.8464
TraesCS1B02G443100	-0.682	5.52e-114	-0.48	2.88e-58	-0.685	4.84e-117	77.0121	78.5711	78.508	54.0968	55.1971	52.6273	64.9006	65.0474	64.3716	69.6885	69.8222	71.7194
TraesCS2A02G133700	1.246	5.91e-114	1.561	1.87e-183	0	1	7.14139	6.8379	6.7044	18.2033	17.6402	18.6169	23.086	24.1814	23.4303	10.3793	9.79142	9.84167
TraesCS2B02G623400	0.838	8.26e-114	-0.019	0.7447	-1.856	1.14e-262	88.5009	87.3815	87.428	174.177	172.717	175.742	100.166	99.2052	101.63	36.4145	35.1403	34.0278
TraesCS6A02G273400	-0.585	1.05e-113	-0.485	1.46e-78	-1.255	0	67.0539	67.1365	66.1777	49.2995	49.9406	49.0697	55.4676	54.8922	55.3943	40.6407	40.7539	40.4277
TraesCS3D02G164500	0.56	1.19e-113	0.486	4.55e-83	0.97	0	136.353	138.029	137.354	221.634	225.397	226.86	221.693	224.173	222.11	390.35	390.389	389.289
TraesCS3D02G357200	-2.732	1.41e-113	1.077	1.89e-58	-2.105	8.08e-95	4.68608	4.62447	4.48975	0.848311	0.657372	0.800725	11.1637	11.4186	11.1379	1.52133	1.56668	1.56589
TraesCS5B02G013200	0.554	1.41e-113	0.857	4.32e-278	0.739	2.52e-208	95.2	95.1335	94.8866	156.179	154.29	154.379	203.227	199.887	195.016	234.168	230.532	225.844
TraesCS4D02G227500	1.786	1.89e-113	1.368	9.11e-63	0.489	3.97e-08	2.79036	2.62165	2.48202	10.4571	9.86607	9.90571	7.94259	7.95847	7.70157	5.14379	5.41685	5.51626
TraesCS1B02G141200	-0.807	5.56e-113	-0.621	8.86e-69	-1.713	0	80.3561	80.802	80.8055	50.6647	51.9296	50.9801	61.0593	60.094	61.1061	35.1511	36.2026	35.7558
TraesCS7A02G222800	0.63	5.8e-113	-0.586	6.22e-75	-1.538	0	41.0012	40.5769	40.9133	70.2799	70.4632	69.7581	31.5826	31.9406	30.9994	19.6535	21.3367	20.2257
TraesCS7A02G241600	1.201	5.86e-113	1.107	1.71e-93	-2.099	5.36e-128	8.66868	8.55861	8.73034	22.0309	22.1454	22.0543	21.4406	21.5819	21.7405	2.78188	2.98409	3.02744
TraesCS1B02G186300	-0.362	7.56e-113	-0.73	0	-2.112	0	213.185	212.47	213.165	183.625	184.326	183.851	147.622	149.484	148.902	71.6824	71.9657	70.8
TraesCS5B02G002900	-0.662	7.7e-113	-0.705	5.79e-123	-1.193	0	55.1707	55.432	54.3049	38.9196	38.5695	38.1677	38.5064	39.6906	38.993	35.5113	34.4671	34.6896
TraesCS2D02G072200	1.669	8.69e-113	0.121	0.2409	-1.11	4.75e-28	4.52986	4.43577	4.2864	16.0807	15.1593	15.5396	5.60502	5.56495	5.52421	3.02372	2.84075	3.04539
TraesCS6B02G258400	1.132	1.73e-112	-0.654	6.77e-24	2.294	0	5.11772	4.92361	4.94676	12.2214	12.0093	12.2344	3.70329	3.59375	3.73654	35.5498	35.6153	35.4858
TraesCS2A02G380100	2.238	1.87e-112	2.701	2.55e-168	-1.103	4.49e-14	3.34837	3.34889	2.83284	17.0715	15.939	16.9008	23.9071	24.3987	23.4849	2.24415	2.0972	2.09614
TraesCS5D02G179200	1.925	2.08e-112	-0.135	0.2849	-10.119	4.69e-17	8.74818	7.78272	8.17379	34.798	34.9956	34.3435	8.28592	9.01183	8.75266	0	0	0
TraesCS5B02G151000	-1.432	1.55e-111	-0.714	2.85e-35	1.955	0	18.1885	18.6194	18.6293	8.07746	7.43899	7.28441	13.728	12.6115	12.8118	103.674	104.913	103.341
TraesCS4D02G057000	0.766	1.97e-111	-0.165	4.61e-05	-1.67	5.23e-283	24.3304	24.0399	24.4615	46.2899	46.1024	45.064	24.7738	25.4066	25.0733	11	10.7245	11.489
TraesCS7A02G206700	-0.248	1.99e-111	-0.312	4.17e-171	-2.365	0	840.345	833.69	834.516	781.855	780.327	783.526	780.8	775.825	783.732	233.983	235.117	237.638
TraesCS1D02G113400	-0.907	2.18e-111	-0.733	1.97e-74	-0.869	2.07e-105	37.9714	38.9024	38.3135	22.9489	23.1517	22.0678	26.3258	26.7394	27.1981	29.9675	30.325	31.2365
TraesCS2B02G571700	-0.934	4.09e-111	-0.3	5.38e-14	0.336	1.4e-20	28.3433	27.8986	28.887	16.5903	16.3988	16.487	26.7609	26.5831	26.7229	53.5429	51.0833	51.261
TraesCS1A02G267900	1.058	5.14e-111	1.42	2.92e-207	-0.213	0.0001472	5.79149	5.77268	5.82503	13.3612	13.3281	13.4968	18.0042	17.8054	18.0689	7.47574	7.26219	7.03244
TraesCS4A02G272100	0.899	6.36e-111	-0.195	5.32e-05	-2.59	0	43.2189	42.2577	43.6922	90.9056	87.9603	88.5707	43.0249	44.714	42.9849	10.7684	10.1847	10.1796
TraesCS4B02G045700	0.561	6.56e-111	0.712	1.24e-179	-0.333	1.75e-33	41.5861	42.0599	41.3887	68.4553	68.1082	68.2256	78.5126	79.5048	79.1057	48.5659	47.4797	48.001
TraesCS7B02G129300	0.688	6.59e-111	-0.592	9.16e-62	-1.279	5.67e-243	21.0379	20.3348	20.2813	36.952	36.7699	36.5716	16.1666	15.7898	15.4225	12.3252	12.2229	12.3202
TraesCS6D02G142200	-0.404	7.32e-111	-0.94	0	-0.571	1.62e-216	69.1364	68.549	68.8265	57.5714	57.5145	58.2023	41.8385	41.2306	41.5739	67.6832	67.2909	66.6964
TraesCS5D02G399100	0.847	1.95e-110	1.637	0	3.463	0	12.413	12.4149	12.6499	25.3049	24.6433	24.8873	44.4563	46.0661	44.4902	199.582	200.775	199.398
TraesCS3A02G349800	-0.806	2.51e-110	-0.511	4.96e-47	-0.643	5.28e-75	32.0871	31.3876	30.9243	20.2729	19.8776	19.7751	24.8581	25.7598	26.0965	29.6695	29.0022	29.0418
TraesCS6B02G388100	0.807	2.56e-110	0.197	1.5e-06	-0.904	1.91e-93	23.6187	23.3589	23.8173	45.4215	45.9813	46.1325	31.5575	31.2784	31.1692	18.557	18.0936	18.2313
TraesCS1D02G299700	1.123	5.78e-110	0.94	6.32e-74	0.602	3.04e-30	23.3063	23.8849	23.6321	56.346	57.5109	57.3784	51.5554	51.1813	54.5921	51.5789	52.5997	51.7717
TraesCS3A02G533600	1.575	6.44e-110	-0.336	0.0002731	-2.496	3.55e-85	5.00713	5.06313	5.06582	16.2891	16.5066	17.2642	4.75356	4.51731	4.61583	1.20142	1.33504	1.35661
TraesCS4A02G270400	0.966	8.75e-110	1.035	2.61e-125	-1.036	9.3e-78	18.8993	18.4978	18.7352	40.1366	40.926	40.6557	44.6151	44.457	44.104	13.253	13.01	13.4613
TraesCS3A02G382100	2.394	1.32e-109	1.984	4.79e-72	0.063	0.6864	1.34628	1.22267	1.44011	7.55108	7.9544	7.87948	6.05189	6.28463	6.03576	2.07597	2.00136	2.00035
TraesCS1B02G409300	-1.241	1.33e-109	-1.263	1.09e-109	-2.438	2.17e-283	44.3094	46.2104	44.0634	21.3339	21.5684	20.3178	20.6731	21.7745	22.4927	11.5402	12.209	12.2982
TraesCS5A02G002700	-0.629	1.4e-109	-0.671	5.85e-120	-1.119	2.98e-306	50.3016	48.9559	48.9975	35.6978	35.3671	35.3192	35.7479	35.9514	36.1339	33.1606	33.0322	32.8277
TraesCS7A02G294200	-0.349	1.83e-109	-0.605	8.15e-303	-1.191	0	221.4	223.022	222.632	195.143	192.816	193.468	168.494	170.847	168.62	141.749	141.2	141.155
TraesCS3D02G346000	-0.994	1.94e-109	-0.832	3.56e-78	-2.965	0	47.6561	48.4718	49.5976	27.2759	27.2544	26.6938	31.2817	31.9777	31.5612	8.7138	8.79282	9.56957
TraesCS2B02G195600	0.804	2.56e-109	0.649	1.19e-68	0.109	0.007629	27.5979	29.2456	28.5357	55.6026	55.344	54.4815	50.8031	52.2323	52.0499	43.9861	44.896	44.7274
TraesCS2A02G292900	-0.678	3.95e-109	-0.477	1.36e-55	-0.952	1.87e-203	43.8657	44.2816	42.6967	30.0901	29.7643	30.9105	36.4171	36.8435	35.6213	32.9363	32.8512	32.358
TraesCS4D02G198500	-1.351	4.24e-109	-0.943	1.18e-58	-0.258	2.2e-06	23.6058	24.5053	24.1756	10.3807	11.2939	9.77708	13.8039	14.6804	15.0471	28.912	29.5518	29.2822
TraesCS5B02G099100	1.38	6.39e-109	0.954	2.55e-48	1.612	1.98e-154	10.1928	10.7879	11.0032	30.4862	30.9655	30.9627	23.6753	24.5005	23.6023	46.7024	47.0868	48.0329
TraesCS3D02G142300	-0.9	1.11e-108	-0.766	1.09e-79	1.012	1.38e-205	33.4333	34.2099	34.4046	20.6637	20.0157	20.0139	23.2365	22.9554	23.3091	99.2472	101.601	97.6893
TraesCS6D02G337500	0.646	2.27e-108	0.258	2.27e-16	-0.856	1.77e-134	38.1387	37.6025	37.8233	65.9672	65.5475	65.7917	51.8981	52.8926	52.4612	30.5193	30.5708	29.9734
TraesCS5D02G393200	-1.493	6.37e-108	-1.756	1.09e-131	-2.945	1.04e-238	15.9148	15.4525	15.577	6.32935	5.84881	6.33098	5.124	5.4357	5.53931	3.08877	2.85505	2.90039
TraesCS3A02G332400	-0.684	8.55e-108	-0.608	8.13e-85	-0.844	7.43e-160	95.0375	96.0185	94.7228	67.688	64.8324	64.9257	71.9172	72.0351	73.1798	77.4505	75.7064	77.9194
TraesCS2B02G397000	1.62	8.97e-108	1.927	5.49e-156	0.17	0.05965	6.62924	6.47534	6.54078	22.7189	22.192	22.1009	28.2463	28.5146	29.7421	10.6329	10.5965	10.8531
TraesCS3B02G091400	-0.63	8.97e-108	-0.473	6.91e-62	-11.352	3.59e-68	79.9751	78.4356	79.5051	56.4347	57.8794	56.3864	67.0077	66.4289	65.0693	0.0264092	0.0528236	0.0527969
TraesCS4B02G010000	0.774	1.2e-107	-0.173	2.52e-05	-5.446	0	26.9419	26.7769	26.0803	50.8306	49.5021	51.1194	27.7803	26.6412	27.5468	1.06291	0.838149	0.755996
TraesCS3B02G315800	-0.791	1.7e-107	-0.575	8.07e-59	-2.199	0	35.2853	34.4969	35.3425	22.113	22.644	22.6737	27.3545	27.3394	27.0376	10.6914	11.372	11.1665
TraesCS2B02G031800	-0.609	1.7e-107	-0.605	3.85e-104	-1.605	0	114.163	114.038	116.719	81.914	85.4092	83.7638	88.6847	87.8089	86.0989	55.7274	53.4968	55.2922
TraesCS4B02G087800	1.474	4.2e-107	1.73	1.18e-150	2.538	0	4.17991	4.2151	4.25191	12.9323	12.9203	13.1344	15.8419	16.1951	16.5649	35.7176	34.907	35.9327
TraesCS1B02G170100	-0.338	6.2e-107	-0.257	5.48e-62	-4.71	0	364.213	366.893	367.86	320.909	323.093	321.11	352.414	356.914	355.549	20.0305	20.8532	20.0597
TraesCS2D02G552100	-1.301	6.45e-107	-0.956	5.67e-63	-0.475	1.56e-19	32.5373	32.2367	33.4768	14.6446	14.3201	15.3075	19.4365	19.5202	19.6835	33.9243	34.9432	33.6798
TraesCS3D02G436100	-0.473	6.95e-107	-0.398	1.75e-75	-2.088	0	39.2247	39.4068	39.5294	31.1658	31.3131	31.9918	34.7238	34.8795	34.2186	13.4513	13.4445	13.4213
TraesCS1A02G298800	-0.516	9.06e-107	-0.415	1.57e-69	-1.613	0	224.449	221.629	225.841	173.354	173.962	174.402	197.012	192.086	194.375	105.391	105.977	107.417
TraesCS4A02G311300	-0.691	1.12e-106	-0.838	2.54e-146	-1.48	0	29.5258	30.1954	30.0761	20.6244	20.2426	20.8675	19.3198	19.5753	19.2971	15.6632	15.7737	15.2892
TraesCS5B02G049800	1.292	1.37e-106	0.197	0.006566	-3.36	2.53e-141	7.07919	7.45958	7.39126	19.6329	20.0901	19.8978	9.84911	9.46304	9.81114	1.04766	0.982278	1.06905
TraesCS7D02G330100	1.608	1.47e-106	-0.326	0.0005269	-3.772	1.11e-99	6.19409	6.46804	5.96721	20.4112	21.8681	20.7386	5.53442	5.46746	6.20981	0.609043	0.634483	0.735628
TraesCS2B02G059500	1.093	1.57e-106	0.849	4.25e-61	0.074	0.2279	24.8686	26.2542	25.5054	60.2879	60.1262	60.9887	52.5265	53.5016	53.8067	38.8081	38.6968	39.5406
TraesCS6D02G202500	-1.036	1.81e-106	-0.956	2.7e-90	-0.67	4.79e-51	35.9834	36.8452	36.0081	19.8062	20.0594	19.0725	21.158	21.3436	22.4745	33.143	33.3533	32.7504
TraesCS5A02G529100	-0.762	2.52e-106	-1.065	4.34e-184	-1.648	0	44.7011	44.3197	44.7317	29.2027	28.8799	29.4453	24.3858	25.045	24.5847	20.7658	20.2987	20.8808
TraesCS3D02G540200	1.901	6.48e-106	0.079	0.5506	-2.756	9.78e-57	4.09498	3.60131	4.21553	16.7184	16.5211	16.136	5.11894	4.74116	4.71583	0.853306	0.796498	0.909824
TraesCS7A02G348600	1.356	8.59e-106	-0.184	0.02512	-3.465	3.68e-128	7.41538	7.06613	6.99198	20.4314	20.0465	20.53	7.31977	7.13278	7.44545	1.03501	0.846907	0.940532
TraesCS6D02G374200	-0.67	1.26e-105	-0.454	2.81e-50	-1.901	0	33.7841	35.2268	34.5436	23.8998	24.0736	24.2698	29.1142	28.7474	29.6586	13.5502	13.621	13.0585
TraesCS7D02G333200	1.446	1.64e-105	0.541	1.98e-13	-0.553	1.06e-11	10.8516	9.92033	9.24108	29.5107	30.6541	30.6215	16.7912	16.8595	16.9257	10.1464	9.35821	10.1799
TraesCS1B02G206800	0.728	1.93e-105	0.674	2.53e-88	-3.754	0	35.3019	36.0204	36.2006	65.5039	67.3133	64.9474	66.8038	65.4796	66.4145	3.94693	3.83613	3.77863
TraesCS6B02G440200	-0.599	2.44e-105	-0.582	2.52e-97	1.081	0	28.8128	28.7601	28.5756	20.8763	21.221	21.0367	22.4969	21.9896	22.142	87.5977	89.1811	87.723
TraesCS7B02G169500	-0.923	2.55e-105	-0.515	4.07e-36	-0.142	0.0003849	24.057	24.6225	25.5992	14.4317	14.6368	14.42	19.6892	20.0351	20.4817	33.0903	32.1625	32.4177
TraesCS3B02G240000	-1.224	2.96e-105	-0.795	3.08e-49	-1.923	2.34e-207	16.3765	16.4113	15.7748	7.8345	7.82178	7.41918	11.1051	10.5189	10.795	6.27286	6.29296	6.01716
TraesCS3A02G531200	0.751	3.04e-105	1.035	2.52e-205	-1.56	5.08e-240	46.3824	47.6942	46.3779	87.334	88.5113	86.5573	111.509	111.559	110.275	22.9486	22.7757	23.377
TraesCS2A02G168500	-1.112	3.72e-105	-1.1	3.47e-100	-2.145	1.02e-274	25.2865	24.6903	24.7034	13.0659	12.6595	12.6172	13.0188	13.709	13.6168	8.13239	8.15911	8.20676
TraesCS2A02G501900	-0.77	1.14e-104	-0.606	4.18e-66	-1.242	1.61e-242	46.5408	46.3259	44.9974	29.7194	29.8653	30.1335	36.1354	34.452	34.2998	28.7831	28.0053	27.7718
TraesCS4D02G214300	0.739	1.18e-104	-0.127	0.001727	-2.297	0	38.5481	39.5103	41.4449	73.9555	73.5565	73.9299	43.0274	41.5572	42.156	11.8375	11.585	11.8609
TraesCS5D02G232400	-0.979	1.57e-104	-1.206	4.37e-144	-3.58	0	48.0911	47.4045	47.9978	27.3299	26.5531	26.9136	24.3619	24.5333	23.1472	5.79321	5.48885	6.13374
TraesCS1A02G423100	1.524	1.79e-104	0.921	6.77e-35	1.494	2.71e-101	2.58398	2.7459	2.73659	8.43287	8.7146	8.61056	5.51427	6.08014	6.09153	11.2037	11.1007	10.6659
TraesCS6B02G430000	-0.659	1.87e-104	-0.493	9.27e-60	-1.542	0	23.6325	23.5123	23.4452	16.4455	16.5276	16.6447	19.2232	19.4713	19.3951	11.7602	11.6225	11.7875
TraesCS2B02G490400	-5.258	2.11e-104	-1.577	1.71e-54	-11.491	1.13e-21	16.3321	16.6718	16.5308	0.502759	0.467011	0.466968	7.06401	6.06119	6.10119	0	0	0
TraesCS5B02G559000	-0.693	2.86e-104	-0.473	8.94e-51	1.64	0	51.8098	50.7974	51.1404	35.5112	35.0345	35.0545	42.7603	43.0768	42.4771	231.857	232.115	231.205
TraesCS5A02G251000	0.569	3.25e-104	0.292	3.51e-26	-0.322	4.43e-29	28.709	28.1522	28.6026	46.5813	47.4652	46.7032	40.6629	40.5687	39.9542	32.9814	32.7909	33.4246
TraesCS5D02G038600	-0.525	3.47e-104	-0.684	3.95e-166	-0.927	2.23e-298	49.3665	49.0335	49.017	37.4636	38.2012	38.0956	35.4191	34.9437	35.9233	37.843	36.6765	38.0205
TraesCS4A02G052200	0.898	3.49e-104	0.26	1.47e-08	-1.172	4.7e-114	12.6682	12.5247	12.2645	25.7307	26.4605	25.2724	16.9769	17.5371	17.4458	7.85319	8.528	7.74748
TraesCS7A02G327800	1.176	4.12e-104	1.115	1.29e-91	-0.102	0.1324	24.9203	24.8131	26.0482	61.6156	63.5001	64.9313	63.6911	63.8162	62.6253	34.9483	33.6101	33.9284
TraesCS3B02G365400	0.921	4.31e-104	0.806	3.07e-77	1.08	3.79e-148	20.9789	20.1501	20.9412	43.8379	42.856	43.7246	42.3663	40.4762	42.843	63.1834	62.9383	64.2256
TraesCS7D02G278600	-0.938	4.53e-104	-0.832	4.13e-82	-1.953	0	41.9184	43.041	43.4535	25.2316	23.9709	25.1883	28.4783	28.0082	27.0619	16.5006	15.561	16.0549
TraesCS2D02G238600	0.648	5.62e-104	0.501	7.02e-60	-1.522	0	54.8134	55.3956	54.4204	95.4181	94.2961	96.6254	89.5259	90.7948	89.4403	28.7037	27.7705	26.7169
TraesCS5D02G532100	-0.59	5.83e-104	-0.673	7.52e-129	-1.987	0	69.1319	70.0135	70.2582	51.4659	51.2851	51.6979	50.5448	50.9274	50.6374	25.6121	25.6648	25.4013
TraesCS6D02G320800	1.718	6.24e-104	0.362	0.0001335	-1.898	6.59e-54	5.78692	6.57705	5.68559	21.813	22.0981	21.9952	9.21625	9.44265	8.20223	2.5115	2.28919	2.22448
TraesCS4D02G298600	1.592	6.25e-104	1.905	7.65e-153	3.758	0	4.67766	4.48446	4.43834	15.1494	15.2011	15.1533	19.8662	19.4266	19.6859	89.5758	89.2624	88.2218
TraesCS4A02G255700	-1.785	9.04e-104	-1.39	4.74e-70	-1.069	1.46e-48	7.9525	8.13836	8.64006	2.61392	2.66931	2.68268	3.74311	3.74348	3.43905	5.95561	5.63007	5.52429
TraesCS1B02G249000	0.649	1.07e-103	0.658	9.16e-105	3.195	0	32.4185	32.445	32.6992	56.4211	57.5762	55.7957	60.0608	59.4669	58.7505	432.213	433.427	431.179
TraesCS4B02G129700	-0.59	1.23e-103	-0.565	1.46e-93	-1.937	0	118.677	123.07	120.995	89.164	88.7359	89.6768	93.5992	96.277	94.1194	45.4184	45.4229	46.6343
TraesCS4D02G296200	2.885	1.23e-103	3.445	1.35e-151	5.175	0	1.73136	1.65794	1.84314	14.0202	14.5904	14.3064	21.6298	22.0267	22.3419	89.3995	90.477	94.3477
TraesCS5B02G075900	0.934	2.83e-103	1.049	2.33e-130	0.585	1.99e-39	7.77025	8.22181	7.86989	17.097	16.9925	16.519	19.1422	18.7738	19.2446	17.023	17.2905	17.6107
TraesCS4B02G360800	-0.699	2.84e-103	-1.047	1.3e-208	-2.17	0	64.9062	63.9982	63.4532	44.416	43.6852	43.3942	34.6337	37.0318	36.1543	21.5827	20.379	20.0554
TraesCS4A02G330300	1.197	3.82e-103	1.27	1.52e-115	0.158	0.01564	13.4959	13.8354	13.7752	34.3835	35.1073	35.1365	38.3565	38.1433	38.287	22.3054	22.3076	21.9295
TraesCS4A02G320200	-0.613	4.45e-103	-0.737	1.93e-139	0.798	4.64e-235	48.355	48.6497	47.6104	34.9055	34.5126	35.5302	32.9477	33.6751	33.8373	121.396	122.164	121.224
TraesCS5D02G118500	-0.3	4.83e-103	-0.296	7.45e-99	-1.872	0	471.635	471.564	470.388	423.06	423.276	428.571	444.755	443.079	445.247	185.596	186.907	187.717
TraesCS3A02G278000	1.801	5.35e-103	-0.071	0.5888	-4.238	1.09e-60	3.92761	3.88642	3.67943	14.7609	14.9864	14.7246	4.14118	4.54455	3.98478	0.302993	0.252519	0.328109
TraesCS1B02G093600	1.111	6.13e-103	-0.921	5.11e-45	-2.824	1.22e-196	8.05404	7.58293	7.77856	18.3915	18.9121	18.8247	4.63624	4.92392	4.75968	1.58892	1.66622	1.54202
TraesCS6A02G271600	-0.558	7.06e-103	-0.039	0.1873	-0.359	3.62e-46	45.0138	44.2315	44.8842	33.8636	34.1829	33.1157	50.2127	50.6536	50.3221	50.7081	50.1021	50.9705
TraesCSU02G166000	1.24	9.19e-103	-0.817	1.02e-28	-3.138	9.89e-157	8.12222	8.22942	8.11011	21.4809	21.4038	21.2494	5.18381	5.75194	5.14636	1.38711	1.40859	1.23723
TraesCS6D02G162200	0.462	1.14e-102	-0.179	5.4e-14	-1.344	0	168.631	170.741	169.039	260.716	256.81	259.904	172.824	173.466	173.775	97.3699	96.2209	97.0283
TraesCS2A02G353900	0.531	1.44e-102	0.732	8.9e-198	-0.965	2.03e-243	63.6821	61.8484	63.2905	101.077	101.132	100.646	121.822	122.367	119.102	47.2308	46.5597	46.5862
TraesCS6D02G212000	-0.777	3.26e-102	-1.084	6.39e-177	-1.24	7.5e-232	46.2814	45.0613	46.2485	29.2218	29.9545	29.9518	25.3252	25.4891	24.3583	27.9157	28.6991	27.9044
TraesCS5A02G501900	0.934	4.28e-102	0.431	4.05e-20	-0.562	5.23e-28	15.7806	15.8032	16.0141	33.729	33.5661	33.6795	25.4278	24.0861	24.7793	15.2579	15.993	15.5206
TraesCS4D02G134900	-0.572	4.55e-102	-0.377	9.29e-46	0.08	0.002064	74.9169	75.8571	74.2291	55.4948	56.3035	56.2174	65.9809	66.4397	68.2472	116.942	113.97	114.295
TraesCS5B02G224900	1.686	4.61e-102	2.457	1.83e-232	3.791	0	3.63375	4.43087	4.18417	14.7696	14.8225	14.1528	26.1876	26.0035	25.7095	81.1269	81.526	83.4393
TraesCS5A02G459200	-0.641	6.79e-102	-0.162	6.22e-08	-1.095	6.95e-264	84.2825	86.1017	84.4671	59.9015	60.5909	60.95	87.6584	88.2103	87.9366	57.8631	57.4093	57.8396
TraesCS2A02G313000	-0.607	9.05e-102	-0.613	2.69e-101	-1.983	0	140.03	136.659	136.525	100.416	100.292	100.481	103.941	102.932	105.944	50.297	50.102	51.2761
TraesCS7D02G061400	-1.236	9.13e-102	-0.675	7.16e-35	-1.917	5.71e-199	26.8266	28.4974	27.6925	13.121	12.5754	13.4388	20.7824	20.2282	19.2032	10.5654	10.5334	10.7921
TraesCS4B02G213600	0.654	1.25e-101	-0.206	2.73e-09	-2.118	0	44.0473	43.911	43.0757	77.0513	76.5297	75.3276	44.4812	43.3909	43.6526	14.8644	15.4092	13.5256
TraesCS7D02G191300	-0.802	1.62e-101	-0.406	1.06e-28	-0.858	1.27e-116	34.9385	35.6675	34.7148	22.1596	22.9343	21.9645	30.7034	30.7676	30.5833	28.3735	28.3993	27.5569
TraesCS7A02G200200	-1.31	1.82e-101	-1.571	3.99e-131	-1.426	8.47e-119	11.0441	12.0479	11.3783	5.12659	5.31193	4.99837	4.46317	4.25853	4.71684	6.2181	6.38201	6.01157
TraesCS3A02G362200	-1.71	2.13e-101	-1.009	1.65e-43	-2.824	7e-176	9.99863	9.43537	9.95562	3.26417	3.26531	3.44021	5.73036	5.65973	5.51722	2.04751	1.96741	2.00655
TraesCS5B02G486000	1.988	2.83e-101	-0.057	0.7174	-3.691	8.98e-51	2.19086	1.91365	2.17775	9.04547	9.10466	9.524	2.3631	2.28508	2.34763	0.229482	0.264813	0.211743
TraesCS2A02G263500	-0.878	3.58e-101	-0.562	1.74e-44	-1.099	2.04e-151	36.5762	36.284	37.6097	22.0666	22.3379	22.3358	28.4419	29.4019	28.7877	24.7741	25.5517	24.4874
TraesCS5A02G146900	0.98	5.29e-101	0.273	1.06e-07	-5.804	1.31e-182	30.0292	30.361	30.9228	66.534	66.6967	66.6558	40.4725	43.9826	43.3194	0.703015	0.834913	0.834491
TraesCS7A02G528700	1.167	5.46e-101	1.574	1.57e-190	1.816	4.1e-265	33.3011	30.1902	30.2756	80.3108	75.7575	77.6759	105.115	111.58	106.532	158.396	161.257	159.587
TraesCS7B02G197300	0.598	6.37e-101	0.037	0.3114	-0.858	1.15e-149	78.1946	78.5306	76.3388	130.289	130.991	130.323	93.1185	91.9317	91.9681	62.7427	61.0954	62.8043
TraesCS2D02G176800	0.709	7.22e-101	0.66	2.84e-85	0.064	0.0986	33.0435	31.7369	31.9413	58.8663	58.55	58.1404	59.0924	59.1233	58.8208	48.2292	49.3662	49.115
TraesCS7D02G103500	-0.454	1.04e-100	-0.569	2.46e-150	-2.342	0	193.101	191.036	192.251	154.42	156.89	155.777	151.488	149.539	148.975	54.7177	54.3278	55.9207
TraesCS3A02G113900	-0.431	1.46e-100	-0.069	0.001279	0.747	0	61.4324	60.8825	61.5202	50.5683	50.5859	50.1983	67.2295	67.4929	68.2128	148.784	149.502	149.385
TraesCS4B02G355100	-0.643	1.8e-100	-0.389	1.59e-38	-1.31	0	68.6083	69.5158	67.2146	47.5144	48.7985	49.6088	60.4634	60.6464	60.5185	40.3902	40.166	39.604
TraesCS2B02G038700	1.268	1.87e-100	1.728	1.68e-194	-7.752	2.17e-38	7.53702	7.94856	7.7799	20.6002	20.856	20.7505	29.3642	29.9456	29.9217	0.0522018	0.052207	0.0521806
TraesCS3B02G099900	-1.924	1.87e-100	-2.306	1.2e-118	-3.624	2.96e-165	4.70249	4.64966	4.57177	1.30883	1.41198	1.35195	1.08994	1.09005	1.08046	0.571576	0.560847	0.506664
TraesCS5D02G174400	-1.091	2.4e-100	-0.788	5.43e-56	-1.202	3.73e-120	27.377	27.1038	27.0173	14.2588	13.9011	14.3108	18.1242	18.6123	17.9365	16.9399	17.6424	16.8112
TraesCS3D02G538900	1.374	2.58e-100	-0.148	0.08862	-1.266	1.5e-48	6.42561	6.30401	6.13216	18.7993	17.6473	17.8135	6.2658	6.69793	6.75406	3.91472	3.87279	3.59585
TraesCS3A02G019600	1.214	2.97e-100	1.061	8.03e-74	0.772	5.12e-39	7.93576	7.91619	8.12829	20.3142	20.5803	20.8573	18.9425	19.4341	19.5672	19.6593	20.2137	19.5509
TraesCS2D02G312000	1.538	3.02e-100	0.3	0.0006372	-1.247	7.01e-36	4.81872	4.44321	4.44558	14.2367	15.135	14.8072	6.66025	6.48814	6.39201	2.74957	2.8581	2.77009
TraesCS3D02G188100	-0.637	3.32e-100	-0.503	2.31e-63	-4.116	0	51.7241	51.7661	50.5486	36.4346	36.6925	36.8689	42.3099	41.7296	41.8382	4.57265	4.32591	3.9943
TraesCS6D02G230000	-0.647	5.21e-100	-1.103	1.82e-252	-2.615	0	41.8802	42.3055	41.1596	29.723	30.1472	28.9762	22.5048	22.1942	22.9008	9.57107	10.0629	10.0578
TraesCS4A02G010700	1.156	6.4e-100	0.485	4.1e-16	-0.685	9.11e-25	23.8781	22.7962	23.5489	58.2221	57.2015	58.2844	38.7472	38.1695	36.8998	20.1536	21.7657	21.4567
TraesCS2A02G417300	2.711	6.56e-100	2.857	2.66e-111	3.718	3.07e-199	1.17303	1.08631	1.21731	8.51755	8.43719	8.31143	9.86879	9.93959	9.35743	21.8434	22.3707	22.1757
TraesCS4B02G047300	-0.439	7.22e-100	-0.419	1.48e-89	-1.588	0	74.3079	75.0035	75.0434	61.5364	61.1371	61.0572	65.1391	64.689	64.4662	35.7548	36.4761	36.0834
TraesCS6D02G286900	-0.329	8.23e-100	-0.657	0	-1.847	0	205.74	204.95	203.049	180.804	181.463	180.028	150.648	150.408	149.7	82.1722	81.9817	83.3519
TraesCS1D02G052700	2.618	8.31e-100	2.965	3.49e-130	2.598	3.39e-99	1.36983	1.34642	1.46531	9.28321	9.3091	9.89709	12.577	12.4011	12.831	12.1885	12.4751	12.0694
TraesCS1D02G000800	0.813	8.44e-100	0.099	0.0357	-0.74	8.13e-60	27.054	27.436	26.8204	53.5628	52.5186	52.4655	33.8459	34.0112	33.0117	23.564	24.1449	22.9458
TraesCS1D02G053700	-0.58	1.07e-99	-0.191	2.62e-12	-0.81	5.85e-186	151.531	147.039	149.085	110.903	109.312	112.303	150.963	151.936	151.214	124.957	123.24	122.368
TraesCS2A02G433500	3.594	1.16e-99	2.658	2.49e-51	8.516	0	0.803998	0.648485	0.622877	9.32394	9.42669	9.07764	5.27994	5.16929	4.72451	367.149	369.38	365.685
TraesCS6D02G327400	-0.747	1.5e-99	-0.727	1.26e-92	-0.96	1.82e-158	17.4644	17.8927	17.4838	11.6319	11.6288	11.6922	11.8004	12.3696	12.7934	13.2655	13.1765	12.9624
TraesCS2D02G414600	2.313	1.63e-99	2.668	5.28e-135	3.003	3.31e-177	1.18983	1.11918	1.06308	6.55885	6.15362	5.89498	8.07419	8.24195	8.49979	13.0449	13.1832	13.0054
TraesCS5B02G102000	0.527	1.83e-99	0.008	0.8324	-0.773	2.8e-163	95.4525	95.8834	95.7101	151.737	153.571	153.833	109.823	113.471	111.066	82.5462	79.9613	81.1975
TraesCS4D02G182600	-0.422	3.43e-99	-0.648	7.65e-215	-1.28	0	53.6031	53.6199	53.3905	44.1154	44.4274	44.514	39.6397	39.5055	39.5966	32.5013	31.7153	31.7304
TraesCS6D02G287300	-0.567	4.15e-99	-0.397	1.06e-49	-2.477	0	149.958	152.712	154.118	113.384	114.455	114.524	134.436	132.765	134.668	40.1976	38.4015	40.4312
TraesCS1B02G228500	0.997	4.98e-99	0.381	1.63e-13	-0.314	8.5e-09	28.5438	27.1326	27.4224	62.0035	60.63	61.4539	41.7475	42.2572	41.2872	31.1242	34.3113	31.5865
TraesCS1A02G179400	1.411	5.19e-99	1.375	2.27e-92	-3.644	1.57e-102	15.4095	15.1533	14.6439	43.327	45.3754	44.7762	46.2638	44.3289	45.159	1.99988	1.56256	1.68671
TraesCS3B02G022900	-0.679	5.66e-99	-0.898	6.12e-159	-2.083	0	45.4985	44.725	45.5806	30.9331	31.4808	31.7545	28.465	27.9952	27.94	15.2133	15.1943	16.1089
TraesCS2B02G233300	-0.388	6.08e-99	-0.497	1.49e-154	-0.66	2.2e-272	171.346	170.274	170.611	144.63	145.282	144.603	138.307	140.506	141.535	157.009	155.21	158.109
TraesCS2D02G028600	2.732	6.81e-99	3.187	1.15e-137	5.069	0	1.74386	1.67705	1.64438	12.1849	12.8003	12.381	17.5711	17.8963	17.9677	81.1437	82.6515	82.8529
TraesCS6D02G144700	-1.078	8.19e-99	-0.971	1.6e-80	-2.454	0	21.0769	20.6112	20.9289	11.045	11.1008	10.7885	12.1707	12.7515	12.075	5.6874	5.5572	5.33658
TraesCS2D02G385300	0.681	1.04e-98	0.72	2.49e-109	-0.897	1.39e-117	45.2759	45.7767	45.7702	81.4847	80.6844	81.2689	87.9631	86.6157	86.4484	35.3239	35.8123	35.496
TraesCS2A02G312600	-0.402	1.1e-98	-0.317	1.66e-61	-2.315	0	104.196	103.964	103.093	87.5566	87.3744	86.6156	95.8864	95.9937	97.5016	29.3814	30.4411	30.9617
TraesCS2D02G311100	-0.443	1.33e-98	-0.24	4.91e-30	-1.323	0	71.5456	72.5221	70.9893	58.6206	58.7749	58.2007	70.3032	70.1106	70.4954	40.8661	42.6417	41.1868
TraesCS2D02G546600	2.015	1.54e-98	2.437	3.17e-148	0.17	0.1711	2.0861	2.06728	2.3365	9.6326	9.80115	9.69014	13.4112	13.3715	13.9249	3.6778	3.5625	3.35261
TraesCS7D02G233100	-1.107	1.55e-98	-0.881	6.7e-65	-1.618	9.99e-182	14.1338	13.8096	14.0305	7.31644	7.29492	7.01741	8.67486	9.24064	8.48721	6.62955	6.63021	6.58137
TraesCS2A02G062400	2.533	1.97e-98	-1.685	2.71e-16	-8.98	1.31e-13	3.04102	3.07904	2.59228	18.86	18.5425	18.5768	1.08613	0.925309	1.12644	0	0	0
TraesCS5B02G400000	-0.793	2.23e-98	-1.13	3.63e-176	-3.128	0	19.1486	19.2284	19.1329	12.0111	12.5497	12.2906	10.0888	10.0897	10.2542	3.21656	3.22849	3.09918
TraesCS6A02G385200	1.199	3.06e-98	-0.107	0.1666	-0.957	3.47e-40	17.7758	16.7485	17.5208	43.4811	44.8499	44.3337	18.3515	18.2716	19.3339	13.7386	12.5873	12.5809
TraesCS2D02G206500	1.872	3.87e-98	1.446	2.53e-55	-0.336	0.003601	4.14716	4.6121	4.70747	18.2175	18.0161	18.4893	14.5245	14.4928	13.4644	5.49851	5.01274	4.97282
TraesCS2B02G530500	-0.243	3.93e-98	-0.152	8.04e-39	-0.353	1.7e-204	172.818	171.555	172.124	160.596	161.706	162.057	178.222	180.317	179.689	196.61	195.498	194.58
TraesCS5B02G412500	-0.268	4.48e-98	-0.099	3.75e-14	-1.087	0	378.705	374.594	378.807	347.568	349.172	346.948	404.043	410.783	409.573	257.709	258.71	257.09
TraesCS4D02G149400	-0.453	6.87e-98	-0.54	9.15e-133	-0.992	0	70.2648	69.4442	70.2609	56.3547	56.4117	57.4776	55.498	55.6009	56.1284	51.4554	50.7541	51.0265
TraesCS7B02G186500	-0.313	1.28e-97	-0.392	7.11e-148	-0.609	0	249.632	250.323	247.507	223.779	220.284	224.038	218.914	221.688	218.931	236.448	237.006	237.853
TraesCS7A02G077400	1.266	1.5e-97	0.838	3.77e-40	-0.704	1.94e-21	22.481	22.3163	23.0574	62.1305	58.1198	60.8563	46.6139	46.5584	47.2782	21.4789	18.4317	20.522
TraesCS4A02G263200	-1.595	1.59e-97	-1.096	6.85e-53	-1.532	2.68e-94	9.39066	9.71177	9.41233	3.54562	3.21115	3.72167	5.15324	5.30052	4.99053	4.72744	4.91187	4.67036
TraesCS2D02G326900	-1.165	1.85e-97	-0.821	2.02e-52	-1.379	3.88e-130	12.1152	12.3951	12.389	5.80128	6.36061	6.10563	8.14876	7.8788	8.1629	6.90133	6.85621	6.82222
TraesCS5A02G535100	4.71	1.9e-97	1.865	1.75e-13	-1.094	0.003767	0.962032	1.33225	1.2589	32.9184	35.9106	34.4171	4.7575	5.07517	5.15435	0.626074	0.89448	0.894028
TraesCS1D02G141100	0.957	2.19e-97	0.021	0.7778	-0.758	1.33e-42	13.1157	13.3831	13.5041	29.1088	28.6464	28.462	15.4747	15.8825	15.6384	11.4993	11.4317	11.4031
TraesCS6B02G408100	-0.76	3.43e-97	-0.9	9.99e-127	-0.925	9.87e-140	32.531	32.7414	32.793	21.5405	21.3347	21.3983	20.4076	20.428	20.0241	24.7152	24.8625	25.3668
TraesCS5D02G157600	-1.295	3.61e-97	-0.705	2.83e-35	2.556	0	16.9613	16.9639	17.0506	7.62133	7.89717	7.5488	12.0972	12.1262	11.9871	144.622	144.605	145.784
TraesCS4D02G280400	1.245	4.27e-97	2.614	0	-2.678	4.39e-116	9.31116	9.20303	9.64639	24.889	24.5563	24.6328	67.5479	65.6177	66.5552	2.15139	2.21781	2.01818
TraesCS2D02G291100	-0.67	4.58e-97	-0.489	3.18e-53	-0.946	5.38e-182	34.6597	35.3445	35.5947	24.4427	24.4651	24.7678	29.5176	28.5292	29.0706	26.4998	26.4675	26.5589
TraesCS3A02G452100	-1.343	5.84e-97	-1.028	1.05e-60	-3.866	4.5e-269	18.0882	18.2197	18.9379	8.06358	8.23102	7.88047	10.8975	10.3927	10.0936	2.07462	1.63392	1.78863
TraesCS2A02G198700	1.938	8.08e-97	1.065	2.83e-26	-0.493	5.3e-05	3.65977	3.82798	3.38271	15.293	15.5127	15.4309	8.98018	8.80144	8.56175	3.5453	3.98464	3.67887
TraesCS2D02G027900	1.383	8.12e-97	1.228	7.24e-74	-10.913	1.09e-19	6.3243	6.03493	6.01739	17.7517	17.4596	17.9949	16.7742	16.287	16.7754	0	0	0
TraesCS5B02G202800	-0.692	8.53e-97	-0.526	4.48e-57	-8.693	4.32e-173	56.0013	56.4796	57.0915	39.0006	38.092	39.3967	45.1707	45.295	45.917	0.243269	0.216261	0.135095
TraesCS5B02G409400	0.896	1.09e-96	0.037	0.5502	-2.03	9.03e-220	29.0553	28.0773	27.8069	57.3499	58.3423	59.7346	34.0177	33.2401	33.6468	10.2246	10.1874	9.76115
TraesCS3A02G510100	-0.258	1.18e-96	0.258	8.53e-104	-8.421	0	521.676	522.407	524.176	486.019	483.42	486.56	721.373	726.632	723.157	2.13804	2.36333	2.13717
TraesCS3A02G282100	-0.634	1.82e-96	-0.395	2.98e-39	-1.809	0	60.8711	60.4245	60.739	44.3706	42.7622	43.0914	53.4056	53.7132	53.177	24.8465	25.7148	24.8102
TraesCS4A02G227300	-0.58	2.04e-96	-0.704	4.99e-134	-2.072	0	81.6406	80.5453	81.9674	60.4762	60.5681	60.2793	58.5194	57.2328	57.7853	28.557	27.9649	27.7129
TraesCS3D02G495700	2.788	2.05e-96	3.634	4.48e-170	-5.937	6.8e-12	1.712	1.298	1.2158	11.1447	10.513	10.7504	20.0892	20.0024	20.6825	0.0333728	0.0667522	0
TraesCS2A02G380800	1.344	3.03e-96	1.739	1.1e-166	0.194	0.01079	3.28614	3.35608	3.47365	9.38454	9.52098	9.60887	13.4022	12.8207	12.87	5.53789	5.66431	5.59156
TraesCS5A02G147500	0.72	3.83e-96	1.08	1.83e-224	1.128	9.04e-253	13.7423	13.4943	13.8931	24.9315	25.6492	24.6355	33.5145	33.611	33.5403	42.823	44.2465	43.3836
TraesCS2A02G302700	-1.387	4.03e-96	-1.387	8.35e-93	-1.603	1.24e-121	13.9476	13.892	13.5914	5.8465	5.88544	5.848	6.10148	6.06084	6.18439	6.81256	6.48769	6.48442
TraesCS3D02G188000	2.619	4.75e-96	3.007	4.65e-129	3.687	1.14e-202	0.566456	0.631913	0.654051	4.13555	4.16834	4.32464	5.57921	5.63812	6.02319	11.204	11.508	11.9101
TraesCS4D02G038800	-0.738	4.95e-96	-0.761	8.08e-99	-1.186	8.45e-222	33.7887	33.731	33.4813	22.7865	22.1457	22.3096	22.265	23.3965	23.3791	21.8253	21.2761	21.3224
TraesCS3A02G509000	1.222	5.26e-96	0.795	5.06e-38	-1.205	1.93e-53	19.6442	20.3895	20.5984	53.0821	50.6806	53.2382	41.5133	39.4494	40.8801	12.5587	12.7394	12.8525
TraesCS5D02G233700	1.508	1.36e-95	2.052	5.48e-187	4.207	0	4.68959	4.71526	5.14212	15.4724	14.5448	15.9069	23.2797	23.4691	23.121	129.667	129.8	130.277
TraesCS5D02G528500	-0.609	1.47e-95	-0.477	2.23e-59	-1.898	0	40.3955	41.2676	41.1861	29.7944	29.5941	30.0499	33.7982	34.3	34.1331	15.29	16.6036	15.9239
TraesCS3D02G212100	-1.313	2.27e-95	-0.923	5.23e-52	-2.306	1.02e-204	11.4528	11.851	11.6369	5.32086	5.22415	5.06879	6.95376	7.22192	7.15881	3.46044	3.53178	3.26391
TraesCS3D02G354100	1.237	2.36e-95	1.416	2.38e-126	0.353	8.55e-08	3.97951	3.67396	3.92754	9.99889	10.0338	10.2636	11.9367	11.9965	11.8673	6.96339	7.18873	7.31718
TraesCS6B02G281900	1.388	2.63e-95	-1.066	1.9e-33	-6.527	1e-61	8.90668	9.27921	8.41763	26.0904	25.2691	25.9311	5.27531	4.85164	4.58642	0.119606	0.119618	0.179337
TraesCS1B02G322100	1.366	3.65e-95	2.143	7.02e-252	1.36	1.89e-95	13.8175	13.9687	13.3793	38.9773	38.1329	40.7032	69.6051	71.9554	68.9712	52.5621	49.8038	50.9196
TraesCS5B02G087700	0.426	5.82e-95	0.6	2.21e-190	1.464	0	55.3866	55.644	56.587	83.8036	83.5013	82.6582	98.1531	97.2143	98.8125	225.657	223.49	221.957
TraesCS7D02G011800	-0.613	5.92e-95	-1.01	7.61e-226	-0.264	2.82e-20	34.1352	34.0755	34.5164	25.0396	25.4327	24.0903	19.7094	19.9319	19.4323	41.0855	42.0193	40.9903
TraesCS5D02G271800	2.592	7.1e-95	2.788	1.73e-110	1.03	1.51e-13	2.85563	2.41668	2.59381	17.8579	17.0215	17.7782	20.9945	21.5144	20.4312	8.33624	7.59364	7.3775
TraesCS6D02G197600	-1.504	8.14e-95	-1.322	3.11e-75	-2.55	1.15e-191	39.8349	38.6289	42.3403	15.71	15.4628	16.1183	18.8004	19.5927	17.5597	9.55243	10.445	9.9305
TraesCS2D02G146500	1.504	8.36e-95	1.468	1.01e-88	2.086	5.64e-196	4.78552	4.34715	4.7888	15.0471	14.2524	14.5248	14.7476	14.8432	15.0075	28.8658	28.736	28.1645
TraesCS3B02G397200	0.7	8.61e-95	0.652	1.31e-80	-0.537	7.37e-45	23.1852	22.3321	23.2159	40.7878	41.2694	41.8887	41.3143	41.5557	42.2352	22.0246	23.669	23.0505
TraesCS7B02G471600	-0.387	8.7e-95	-0.304	1.86e-58	-0.719	7.58e-306	90.9458	89.5379	89.3715	75.5856	76.4807	77.0045	84.3706	84.1497	84.66	79.7349	79.1346	79.0338
TraesCS3B02G098700	0.633	9.51e-95	1.019	5.98e-256	-0.607	3.82e-67	51.6152	52.3863	52.1698	89.4842	89.9545	89.3901	121.434	122.1	122.882	47.8101	50.2868	50.6671
TraesCS4D02G066600	-0.626	9.86e-95	-0.443	8.41e-49	0.06	0.04741	64.7535	64.8114	64.5816	47.0937	46.8338	45.7705	55.3355	56.4987	53.6159	98.1379	97.7704	97.7501
TraesCS3D02G282800	-0.857	9.89e-95	-1.024	2.57e-125	-1.639	2.78e-275	24.7319	25.1474	24.7641	15.7433	15.0616	14.9578	14.2627	13.9863	14.2474	11.3335	11.8322	11.6052
TraesCS1A02G374800	2.077	1.02e-94	1.983	6.59e-85	-0.534	5.56e-05	0.890535	1.02141	0.915671	4.25304	4.50525	4.48917	4.28946	4.60505	4.0534	0.96768	0.928275	0.937677
TraesCS2D02G425000	0.807	1.13e-94	0.027	0.6382	-0.563	1.34e-37	28.0271	26.455	25.9433	50.7161	52.4392	53.035	32.282	31.0726	31.5266	26.6689	25.6213	26.7069
TraesCS4A02G247300	-0.475	1.4e-94	-0.373	1.55e-58	-0.098	1.76e-05	113.745	114.615	116.307	91.7368	92.9713	90.5822	102.745	102.459	103.102	155.778	154.944	156.684
TraesCS7A02G339900	0.735	1.47e-94	0.836	5.27e-122	-13.045	1.06e-27	21.4533	21.3059	22.2383	39.8343	40.1852	40.1013	44.4671	44.5611	45.3132	0	0	0
TraesCS5B02G428500	1.392	1.51e-94	0.196	0.01996	-3.095	6.22e-112	4.77419	4.92275	4.92537	13.6033	14.6712	14.3296	6.6358	6.52557	6.24033	0.786016	0.786094	0.910694
TraesCS4A02G125000	0.408	1.53e-94	-0.179	1.62e-16	-1.055	0	104.789	104.442	104.583	154.083	154.853	153.162	106.907	107.054	107.098	73.7915	73.3863	71.9575
TraesCS3D02G131200	1.947	1.73e-94	1.903	6.12e-89	-1.156	2.63e-17	2.76557	2.85743	2.85895	11.7227	12.5816	12.0106	12.0489	12.197	12.4906	1.9889	1.82334	1.71197
TraesCS2B02G253200	1.449	2.54e-94	1.377	3.28e-83	0.335	2.95e-05	7.60885	8.07123	8.07553	23.9676	24.1023	23.9422	24.5287	23.331	23.5775	14.4509	14.6116	14.4053
TraesCS2D02G135700	1.755	2.65e-94	2.259	1.36e-162	2.965	7.4e-299	1.43582	1.41623	1.4368	5.14524	5.62186	5.30799	8.19088	7.63991	7.93684	16.3121	15.9666	16.3294
TraesCS4B02G100700	1.178	2.73e-94	1.11	5.3e-82	-0.957	2.31e-39	9.72689	9.68334	9.71102	24.5861	24.2923	24.2469	25.042	23.2832	24.489	7.21137	6.93993	7.61647
TraesCS5D02G179900	1.011	2.8e-94	-0.122	0.054	-2.829	6.03e-217	16.7905	16.7421	17.6421	38.2663	37.6942	38.5201	18.6175	17.6107	18.2372	3.22842	3.56699	3.65739
TraesCS2B02G239200	-0.771	4.28e-94	-0.425	5.79e-31	-0.551	2.17e-52	44.854	45.3374	44.5987	29.299	29.6519	28.7127	39.2545	39.0797	37.9301	43.4432	44.3401	45.699
TraesCS5B02G212300	0.806	5.11e-94	1.334	4.82e-275	2.618	0	26.0018	24.6865	25.2276	49.4897	48.9166	48.9683	75.6342	73.3171	72.6872	223.665	226.557	226.159
TraesCS1B02G308500	-0.483	5.71e-94	-0.465	1.07e-85	-1.912	0	134.535	136.061	133.469	107.009	106.491	107.536	114.546	111.798	112.663	51.8218	51.8969	52.0455
TraesCS4A02G144500	0.504	5.84e-94	-0.139	6.79e-07	-1.097	3.47e-303	90.6171	90.754	90.033	141.762	142.785	142.595	94.9853	94.8958	95.6514	61.6907	60.2845	62.0743
TraesCS1D02G428200	-0.148	6.54e-94	-0.522	0	-2.571	0	1911.53	1913.85	1913.46	1914.17	1919.15	1916.36	1539.51	1541.92	1545.73	466.114	465.512	469.913
TraesCS3B02G462800	-0.465	7.19e-94	-0.525	2.58e-115	-1.864	0	109.173	110.526	109.77	88.9902	88.1003	87.8319	86.9325	89.76	88.438	43.7046	43.4061	44.1913
TraesCS1B02G000600	0.609	1.07e-93	-0.21	5.3e-10	-2.651	0	90.6807	91.6943	92.5159	156.534	153.713	155.136	91.8075	91.2809	92.1551	20.92	21.8556	20.7468
TraesCS5B02G389400	2.096	1.35e-93	2.163	2.12e-99	-0.445	0.001195	4.74414	4.79093	4.19429	21.7692	21.6443	21.7306	24.281	23.9379	22.9996	4.89874	4.78788	4.9524
TraesCS6B02G302400	2.051	2.28e-93	2.632	1.28e-160	4.9	0	2.03625	1.71834	2.16499	9.39454	8.88929	8.94949	14.9543	13.8193	13.7281	85.853	85.0155	85.5107
TraesCS3A02G007600	1.848	2.53e-93	1.095	4.31e-30	-1.391	2.79e-26	3.88552	3.55234	3.64965	14.7857	14.105	15.4067	9.06718	8.736	9.62981	2.04551	2.04571	2.04468
TraesCS2D02G220000	-0.829	2.69e-93	-0.371	2.65e-21	-0.375	6.53e-23	43.2998	43.2504	42.853	27.119	27.209	26.5619	39.7025	38.1458	37.9948	48.7439	48.3087	47.7429
TraesCS2D02G525900	-0.95	3.47e-93	-0.297	2.03e-11	0.68	5.06e-72	28.8489	29.0335	30.2593	16.8754	16.7826	16.9785	28.0156	27.5219	27.5765	67.8673	68.6828	68.3683
TraesCS3B02G323900	1.02	4.12e-93	1.088	2.56e-105	0.413	7.94e-15	4.71292	4.66926	4.69839	10.585	10.5461	10.5622	11.5831	11.4511	11.622	8.90338	9.05446	9.2429
TraesCS3A02G209200	-1.015	4.34e-93	-0.726	1.41e-50	-1.41	1.86e-161	9.95399	9.95552	9.84243	5.41132	5.47804	5.45323	7.1616	6.8635	6.80901	5.20839	5.37233	5.66566
TraesCS5D02G432100	-0.6	5.76e-93	-0.759	1.95e-139	-3.483	0	109.819	108.381	107.05	79.3263	78.64	80.3203	74.481	73.1465	74.9943	14.3157	13.949	13.9419
TraesCS5A02G301100	1.718	6.04e-93	1.49	2.34e-67	0.606	6.35e-11	16.0451	16.3503	17.4698	59.5937	62.2275	60.2864	53.7381	51.5807	56.878	36.7107	37.0803	36.3301
TraesCS3B02G563700	-1.228	6.29e-93	-0.602	7.45e-27	-0.532	8.34e-23	12.8623	13.1847	12.4864	6.18848	6.09847	5.97503	9.95437	9.86952	9.5775	13.0674	12.7976	12.8105
TraesCS7B02G235100	1.554	1.6e-92	-0.281	0.005685	-1.303	2.32e-34	5.33983	5.63195	5.53779	18.3593	17.7838	17.6658	4.96729	5.38392	5.3838	3.19751	3.34452	3.16689
TraesCS6B02G234900	-0.779	1.8e-92	-0.712	1.02e-76	-1.792	0	33.7652	33.5549	35.1319	21.8343	22.7799	21.6492	24.0658	23.9083	24.4583	14.4443	14.3856	14.098
TraesCS1D02G101200	-0.592	2.17e-92	-0.687	1.33e-118	-2.788	0	54.278	52.8305	52.9881	39.6313	39.2418	39.0366	38.402	38.0938	38.6821	11.5524	11.4167	10.6684
TraesCS7A02G331100	0.797	2.18e-92	-0.302	3.42e-11	-0.692	1.82e-52	29.7483	29.5937	30.034	57.4958	58.1007	56.8242	27.0734	29.2638	27.6153	27.3017	26.5673	26.3938
TraesCS4D02G151500	0.456	2.31e-92	-0.351	3.51e-46	-2.018	0	85.4015	86.4098	86.4345	129.771	132.943	130.535	78.213	78.4021	77.9466	30.9597	30.6045	30.9471
TraesCS6A02G208200	-0.732	3.59e-92	-0.895	1.84e-128	-1.529	0	31.8908	31.5214	31.0773	21.5916	21.0057	20.5621	19.984	19.2149	19.6462	15.6886	16.1424	15.6648
TraesCS2B02G579000	1.833	3.75e-92	1.665	7.3e-74	0.444	1.79e-05	2.96993	2.99145	2.84549	11.4898	12.1403	11.21	10.6525	10.7664	10.9241	6.05878	5.88116	5.4456
TraesCS3A02G275400	-2.409	5.54e-92	-1.777	3.9e-62	-4.933	1.39e-101	13.9917	14.107	14.1145	2.89243	2.85727	3.074	4.60664	4.60709	5.05152	0.86603	0.501435	0.637868
TraesCS6A02G237300	-1.19	6.24e-92	-0.966	2.43e-63	-0.109	0.04552	26.3849	25.7795	26.7079	12.6474	12.8563	12.8844	15.4086	15.1162	16.2259	36.3812	34.212	35.5198
TraesCS2A02G198000	2.293	8.56e-92	1.048	6.97e-17	-1.247	1.98e-13	2.83343	2.83386	2.70194	15.3714	15.0571	15.0877	6.42906	6.50113	7.10821	1.6518	1.57138	1.89276
TraesCS5A02G225200	1.023	1.02e-91	1.223	1.12e-132	-0.922	1.1e-48	14.577	14.0328	14.413	33.1631	31.2457	32.6716	38.5017	38.7184	39.1166	10.5046	11.226	11.2204
TraesCS3D02G325900	-0.642	1.06e-91	-0.452	6.69e-47	-1.102	1.6e-240	133.842	134.075	133.721	96.1829	94.1791	95.3928	113.702	111.323	115.019	88.5832	91.0957	91.8197
TraesCS5D02G055700	1.028	1.43e-91	0.158	0.01011	-2.512	1.48e-187	11.3949	11.5623	11.4027	25.3248	26.0752	26.3729	14.3198	14.8736	15.2086	2.66982	3.04835	3.02457
TraesCS4A02G158100	-0.659	1.61e-91	-0.426	4.9e-40	0.301	9.95e-25	73.0133	70.7149	70.8133	51.0046	50.4687	49.3569	62.0841	61.3088	61.5352	128.895	129.128	125.502
TraesCS7D02G240600	1.019	2.56e-91	0.807	7.54e-55	-1.775	7.6e-130	11.1751	11.5506	10.6218	24.8307	24.7318	25.4822	22.3859	22.6684	22.5077	4.96884	4.74345	4.42499
TraesCS2B02G378600	3.747	2.81e-91	0.175	0.5717	-2.831	3.53e-10	0.437287	0.420533	0.437587	6.35279	6.54856	6.40281	0.558646	0.558701	0.57671	0.121962	0.0609873	0.0812753
TraesCS6D02G385600	-0.674	2.92e-91	-0.483	1.96e-48	-2.117	0	35.034	35.9737	36.0984	24.8323	24.9855	24.7231	29.32	29.8719	29.5321	11.6554	12.0208	12.1422
TraesCSU02G096900	-1.055	3.51e-91	-0.836	4.56e-59	-3.616	0	20.0905	19.3563	20.6394	10.3923	10.4098	11.2959	12.9778	12.9326	13.0717	2.41066	2.55066	2.14776
TraesCSU02G173800	-1.876	3.61e-91	-0.127	0.1999	-3.654	7.8e-200	86.7847	98.1243	92.4542	25.2607	27.4201	31.1808	105.122	91.1944	97.9205	10.1635	10.3001	11.514
TraesCS6D02G367200	-1.058	3.87e-91	-0.692	1.1e-39	-2.057	0	226.472	233.313	246.621	132.646	123.82	120.139	168.286	169.626	168.584	75.8118	86.68	83.7981
TraesCS7A02G298600	0.752	4.01e-91	-0.369	9.76e-18	-2.756	0	11.0674	10.9343	11.102	20.9361	20.4782	20.4763	9.91414	9.94399	9.81862	2.33429	2.37796	2.39846
TraesCS5A02G052600	1.779	4.13e-91	2.385	1.7e-172	4.01	0	2.44806	2.29891	2.44974	9.28016	9.33717	8.79871	14.6169	14.7385	14.1775	55.4251	55.7017	57.141
TraesCS2B02G266600	1.559	4.39e-91	1.346	2.94e-65	1.645	1.12e-103	4.49081	4.4224	4.28648	13.8872	14.4884	14.7963	13.2509	12.9561	12.6597	20.1516	19.6526	20.0878
TraesCS4B02G193400	0.742	6.22e-91	0.769	1.55e-96	-0.554	5.02e-39	41.2492	41.2187	41.9034	76.0207	77.0354	77.8046	80.7461	82.2918	82.4082	40.8257	40.6074	41.5204
TraesCS7A02G190700	1.04	6.49e-91	0.504	8.41e-20	-1.197	6.47e-71	17.3066	17.0905	17.7248	39.6519	39.3063	39.9917	28.4178	27.7176	29.4577	10.9114	10.7237	11.3599
TraesCS3B02G072200	1.576	6.8e-91	1.372	2.56e-66	0.341	0.0001504	3.90121	3.7208	3.92401	13.0901	12.5354	12.5921	11.7429	11.5286	11.3344	6.97528	7.02458	7.21539
TraesCS4A02G140000	-1.314	7.97e-91	-0.016	0.8473	0.333	3.79e-10	8.21715	7.94953	8.33975	3.65307	3.60951	3.67643	9.18019	9.18109	9.70693	14.9887	15.3716	14.446
TraesCS3B02G579600	2.954	1.65e-90	-1.25	2.13e-07	-5.102	4.41e-14	3.23454	3.52913	3.7517	30.4452	30.8083	29.1842	1.81163	1.57549	1.73299	0.26654	0.0888556	0.0888107
TraesCS6A02G233100	-0.617	1.71e-90	-0.679	4.28e-105	-2.052	0	47.4944	48.1548	47.3722	34.2479	34.952	34.3391	33.9322	34.6352	34.8922	16.884	16.4496	16.7111
TraesCS5A02G490900	2.589	1.79e-90	1.019	3.05e-12	-5.012	1.38e-18	1.08817	0.944289	0.976818	6.73482	6.75252	6.61379	2.19471	2.48644	2.3835	0.0580215	0.0580273	0.0193327
TraesCS1A02G126100	1.923	1.9e-90	-0.25	0.06289	-2.516	8.87e-45	2.47221	2.74938	2.51083	10.6653	11.2529	10.6327	2.37216	2.58986	2.57003	0.579744	0.758202	0.624086
TraesCS6D02G367400	-0.718	2.53e-90	-0.41	2.24e-30	-2.393	0	170.208	163.312	168.46	109.975	116.976	111.813	150.271	140.405	146.937	47.5015	46.7457	44.4123
TraesCS4A02G167000	0.488	2.56e-90	-0.02	0.5632	-1.652	0	81.6086	80.6292	81.7689	127.626	126.519	125.656	93.0621	92.7916	92.9292	37.3142	37.4441	37.9296
TraesCS7D02G091500	1.346	3.08e-90	0.562	2.12e-14	-0.626	3.23e-14	9.43828	9.79594	8.49433	25.4377	26.329	26.4973	15.8689	15.4888	16.0609	8.60911	8.93284	8.5339
TraesCS7B02G251100	-1.7	3.87e-90	-0.857	3.07e-31	2.074	0	9.6422	10.5141	10.1759	3.35939	3.38253	3.6238	6.50312	6.50376	6.38089	62.9457	60.7649	61.5643
TraesCS5B02G111800	-0.27	6.26e-90	-0.273	7.21e-90	-1.811	0	566.705	567.011	575.451	526.291	525.035	521.93	548.918	545.753	543.856	235.907	233.539	237.139
TraesCS4D02G220500	0.935	6.37e-90	1.242	2.14e-163	1.076	5.55e-123	8.68309	8.79349	8.89365	18.818	18.4977	18.6529	24.8002	23.225	24.2324	26.6889	27.12	26.8428
TraesCS7D02G439900	0.711	8.82e-90	-0.34	5.15e-17	-2.783	0	50.2193	50.4055	51.3967	91.9089	92.4545	91.8299	46.313	47.3884	45.3603	10.7845	10.009	11.2544
TraesCS2D02G324900	0.605	1.07e-89	-0.048	0.2255	-1.825	0	64.913	65.0264	64.302	109.425	110.19	108.296	71.9535	72.8102	72.8824	26.5401	26.501	26.5293
TraesCS7A02G248600	-0.699	1.44e-89	-0.575	2.7e-61	-2.944	0	63.6085	64.0175	64.5365	43.8151	44.0492	43.553	49.1534	51.1441	49.0654	12.095	11.9583	12.1934
TraesCS1D02G280900	1.318	1.57e-89	0.499	8.53e-12	-1.985	7.42e-82	8.62284	8.67707	8.25819	24.0136	23.3118	23.4111	13.462	13.8601	14.5117	2.97301	3.16514	3.22745
TraesCS4A02G091100	0.685	2.13e-89	-0.226	1.01e-08	-2.161	0	34.8018	35.2598	35.1832	63.0968	62.7305	61.9481	35.3495	34.7403	34.1014	11.5158	11.2866	11.3384
TraesCS2A02G185500	0.834	2.28e-89	0.375	5.34e-17	-0.976	2.18e-80	15.5987	15.7438	15.6808	31.2245	30.7054	31.1128	23.1317	24.07	23.4391	11.6563	11.5928	11.4362
TraesCS4B02G059100	2.013	2.41e-89	2.616	3.58e-158	5.427	0	2.58322	2.6117	2.4164	10.7943	11.4443	11.8741	18.2317	18.2937	17.511	158.14	158.766	158.313
TraesCS5D02G463000	4.098	2.45e-89	0.001	1	-0.288	0.3578	0.481317	0.752172	0.602058	11.7953	11.309	11.7983	0.67688	0.709182	0.7414	0.69079	0.76358	0.726852
TraesCS5A02G279200	1.03	3.03e-89	0.692	9.59e-38	1.041	1.06e-92	8.70029	8.68397	9.02412	20.0146	19.9708	19.8674	16.5265	16.4524	16.4331	26.7251	26.5144	25.6056
TraesCS7A02G178500	3.088	3.29e-89	1.172	5.47e-11	3.551	1.83e-121	1.40468	1.13077	1.23422	12.481	11.6311	11.4658	3.19369	3.26743	3.37749	21.4074	21.9065	20.8193
TraesCS2D02G545000	0.789	3.53e-89	0.796	2.05e-89	-0.116	0.01109	25.4655	25.1298	24.6205	48.4261	48.393	47.4618	50.5694	50.9942	49.7056	33.6501	34.0955	32.9423
TraesCS2D02G065300	-0.323	3.82e-89	-0.43	1.07e-155	-3.289	0	2134.97	2180.39	2071.38	1893.11	1887.31	1885.78	1819.36	1823.5	1849.15	316.983	316.269	314.794
TraesCS5A02G138700	3.961	3.94e-89	-1.633	2.17e-05	0.118	0.6966	0.497031	0.389041	0.540621	8.30759	8.04108	8.30973	0.208392	0.185255	0.138938	0.731299	0.757493	0.75711
TraesCS5D02G564700	2.185	4.07e-89	2.337	2.12e-102	1.689	1.13e-51	2.39307	2.33576	2.56782	11.775	12.6916	12.3586	14.2416	13.8105	14.6443	11.8478	10.8732	11.425
TraesCS1B02G043200	2.043	5.02e-89	2.751	1.19e-170	6.365	0	0.861235	0.832655	0.785218	3.78882	3.83603	3.71639	6.50055	6.62424	6.20367	97.5079	99.8771	99.0406
TraesCS2B02G040000	2.251	5.03e-89	2.83	2.73e-146	4.604	0	1.59845	1.53208	1.57733	8.2367	8.30345	8.34526	12.988	13.013	12.7748	54.6026	55.735	55.7605
TraesCS6A02G340300	1.666	5.89e-89	0.534	2.26e-08	-1.919	2.9e-47	6.12106	5.83651	6.12525	20.9794	21.7167	21.0152	9.85483	9.58391	10.8751	2.52985	2.30009	2.10735
TraesCS2A02G342100	-1.056	6.79e-89	-1.005	1.63e-79	-1.558	4.83e-168	26.3695	26.6943	27.3503	14.8748	14.052	14.0034	15.1711	15.5163	15.7009	13.7736	12.8209	13.023
TraesCS4D02G212000	-0.274	6.96e-89	-0.376	4.55e-160	-2.295	0	305.499	308.616	308.192	281.901	282.042	282.746	273.58	274.866	274.696	91.1489	89.2375	92.2427
TraesCS4B02G010500	-0.511	8.54e-89	-0.492	3.71e-81	-1.174	0	93.8671	95.0236	96.1965	73.3517	73.5338	75.1696	77.1091	77.4882	80.0867	61.7393	61.8933	59.694
TraesCS7A02G009200	-1.645	1.49e-88	-0.069	0.4139	-11.742	1.27e-22	8.69614	9.14087	9.00923	3.23665	3.18873	3.10668	9.57347	10.0312	10.031	0	0	0
TraesCS5A02G253700	1.634	1.78e-88	1.815	5.47e-110	-0.186	0.07861	13.0513	11.7076	11.3099	41.277	41.2269	41.8037	49.1609	47.1471	50.6784	16.099	14.393	15.5236
TraesCS7A02G351100	0.681	3.02e-88	-0.076	0.07476	-2.477	0	66.6896	67.7925	67.6974	118.106	120.956	120.735	75.8578	73.2896	72.9132	18.328	17.1677	17.2118
TraesCS7D02G170200	0.84	3.63e-88	0.74	2.05e-66	-1.037	7.64e-88	15.3762	15.3953	14.6484	30.3337	29.4277	30.5184	29.2852	28.803	29.7546	10.376	10.9851	10.7567
TraesCS7D02G243000	-0.764	4.13e-88	-0.919	4.06e-118	-2.046	0	23.9669	24.149	24.1207	15.6336	15.7575	15.8219	14.7667	14.7828	14.6942	8.57708	8.4452	8.35802
TraesCS2B02G553600	-0.829	5.28e-88	-0.347	8.63e-18	-0.17	1.61e-05	39.945	39.4901	39.1854	24.8798	24.0823	25.1723	36.0881	36.5275	35.3643	50.965	50.1506	51.8944
TraesCS3D02G159000	1.37	6.52e-88	-0.322	0.0003438	0.256	0.001254	7.55016	7.69488	8.10116	22.3201	22.3004	22.3809	7.16701	6.92161	7.53669	13.3233	13.5329	13.5954
TraesCS5D02G081800	0.669	6.93e-88	0.911	1.29e-166	0.416	9.68e-34	12.7768	12.5798	12.7666	22.2187	22.5807	22.4696	27.8164	27.2609	27.9301	24.6339	24.2013	24.9786
TraesCS1B02G085200	-0.691	6.95e-88	-0.604	5.39e-67	-0.647	1.42e-79	26.4736	26.64	27.1288	18.643	18.5178	18.0134	20.5555	20.5575	20.0488	24.4533	25.3307	24.5941
TraesCS1B02G439700	1.666	8.66e-88	1.535	1.46e-72	-0.253	0.01891	11.1711	11.8799	12.0277	42.2958	41.4969	39.7981	40.1509	38.7911	38.7902	14.4413	14.4427	13.8375
TraesCS7D02G261800	0.755	8.84e-88	-0.254	1.08e-08	-0.107	0.01435	21.1128	20.8579	21.035	39.5618	39.0274	39.4305	21.2388	20.3518	19.5807	28.5477	28.3277	28.0015
TraesCS6A02G242600	1.143	1.11e-87	0.031	0.731	-1.648	6.54e-92	10.5528	11.027	10.4925	26.9854	25.1822	26.4529	12.5608	12.6826	12.7064	5.05814	4.73228	5.05609
TraesCS3D02G159800	-0.811	1.21e-87	-0.851	2.36e-92	-0.39	4.21e-24	20.6249	20.7257	20.639	13.0214	13.0928	13.105	12.9546	13.3594	13.4935	22.9216	22.8733	22.828
TraesCS7A02G550900	0.766	1.4e-87	1.113	3.95e-192	0.542	2.63e-43	14.5092	14.2371	14.2446	26.8405	27.2738	27.0521	36.2202	35.7011	35.7982	30.0245	30.2301	30.5647
TraesCS1A02G278600	-0.849	1.65e-87	-0.413	5.31e-23	-1.897	0	23.3379	23.5982	24.079	14.6601	14.5639	14.5336	20.9138	19.8159	21.061	9.01283	9.1597	9.50158
TraesCS7B02G280100	1.553	1.79e-87	1.817	7e-122	-0.965	1.09e-19	4.1849	4.43044	4.05411	14.042	13.7053	13.5333	17.2682	17.1029	17.3411	3.067	3.22874	3.11954
TraesCS6D02G194600	1.6	2.17e-87	0.278	0.005375	0.439	1.04e-06	5.12505	4.70453	4.91779	16.8039	15.9345	16.898	6.77016	7.0216	6.92113	10.5781	9.13652	9.30154
TraesCS7D02G359500	0.996	2.61e-87	0.093	0.1567	-1.322	7.99e-88	6.32987	6.65058	6.32354	14.0471	14.2768	14.4084	8.00402	8.0619	7.77624	3.91528	3.67094	3.6176
TraesCS2A02G002700	-1.305	2.64e-87	-0.69	7.03e-29	-11.284	5.42e-21	14.4331	14.6493	14.3456	6.45217	6.39846	6.65901	10.4626	10.1093	10.6093	0	0	0.0234996
TraesCS5A02G008900	-1.482	3.1e-87	-0.902	3.52e-38	-0.528	6.48e-16	10.0686	10.4954	9.92229	3.9295	4.20816	3.97944	6.61507	5.88671	6.39686	10.3188	10.361	10.0064
TraesCS1B02G225700	0.776	3.11e-87	0.728	5.77e-75	0.271	7.15e-11	21.6067	21.0085	22.4908	41.129	40.823	41.8232	41.9583	41.5805	41.3647	38.1208	37.7476	38.1592
TraesCS7A02G224000	-1.989	3.37e-87	-0.789	2.7e-19	-11.624	3.65e-22	12.3417	10.6962	11.5857	3.2955	3.11351	3.27346	7.64781	7.95553	7.59722	0	0	0
TraesCS7B02G047300	-3.8	3.59e-87	-1.747	1.14e-45	-3.853	3.25e-90	2.09612	2.07491	2.04728	0.165166	0.158339	0.172092	0.753775	0.638464	0.753832	0.225574	0.182212	0.21681
TraesCS2A02G351300	-1.791	3.63e-87	-2.344	2.76e-116	-3.973	4.79e-161	5.02143	5.39609	5.4394	1.67568	1.72472	1.6858	1.23412	1.15846	1.22339	0.476231	0.464066	0.524862
TraesCS1B02G172400	-0.496	5.38e-87	-0.547	1.35e-101	-0.275	1.43e-29	85.6986	86.7466	86.7928	67.2548	68.4962	68.3095	68.0363	68.6478	68.7974	103.518	103.898	103.448
TraesCS1A02G195900	-1.072	5.74e-87	-0.869	3.23e-59	-3.097	0	15.5167	15.7366	15.4496	8.42801	8.10325	8.1323	9.71915	9.95312	9.93624	2.55302	2.74101	2.62704
TraesCS3D02G528500	2.283	6.75e-87	2.199	2.2e-79	1.641	3.99e-43	2.94739	3.29982	3.78581	17.2067	18.3096	18.6876	17.0629	18.1488	18.1484	14.621	14.9946	15.7843
TraesCS2B02G574100	0.853	1.51e-86	0.808	9.46e-76	0.491	4.66e-28	13.8008	14.0718	14.2407	28.5918	28.1549	27.7226	27.9996	28.252	29.1156	29.2651	28.4881	28.1056
TraesCS4A02G284400	1.838	1.87e-86	1.974	4.63e-100	-1.083	3.11e-16	3.24235	3.19408	2.85424	12.3167	12.2041	12.3432	14.3143	13.8194	14.1325	2.32764	2.15107	1.88492
TraesCS3D02G133900	-2.018	2.02e-86	-1.485	3.75e-55	-2.563	1.06e-113	37.6179	35.2446	36.8502	9.62823	9.88506	10.56	15.3864	15.5767	14.4435	9.36981	8.30588	9.25958
TraesCS5D02G306200	2.036	2.12e-86	1.87	3.63e-71	0.112	0.4184	2.53216	2.04306	2.2145	10.6689	9.93802	10.3044	9.07421	9.71355	9.96414	3.70329	3.57506	3.3676
TraesCS2D02G447500	0.7	2.23e-86	0.446	1.91e-33	0.275	1.55e-13	30.8739	31.8254	31.6723	57.4281	54.911	57.8386	49.3608	49.7558	49.7806	55.1498	55.3313	55.2154
TraesCS1B02G367500	0.828	2.53e-86	1.978	0	-1.543	3.47e-150	16.2193	16.5584	16.2725	32.4092	31.9767	32.2562	74.969	74.3677	74.4336	8.11054	8.46733	7.8531
TraesCS3A02G418400	-0.535	2.53e-86	-0.506	4.11e-76	-1.917	0	132.355	134.185	133.406	102.288	100.801	103.306	110.09	106.303	109.702	51.3581	50.426	51.8725
TraesCS7A02G210100	-0.438	3.12e-86	-0.269	1.44e-33	-0.075	0.0007653	81.2977	80.8013	79.8406	65.3135	65.5734	67.3794	76.0816	78.2386	78.1433	111.853	110.283	111.053
TraesCS3D02G073000	-0.41	3.76e-86	-0.419	7.36e-88	-1.439	0	173.478	172.473	174.574	144.786	144.168	145.947	151.959	150.838	148.145	91.3492	93.3136	93.974
TraesCS5A02G226400	1.438	3.81e-86	1.947	3.61e-166	4.153	0	5.2567	5.02442	5.10483	15.2675	15.4467	15.5694	23.0014	23.9193	21.7822	131.79	133.4	132.081
TraesCS6A02G016200	0.747	4.87e-86	0.937	3.37e-137	0.617	9.68e-59	30.5375	30.9292	28.8438	55.9552	55.4447	56.8176	67.6019	66.2759	66.3928	65.4649	68.0436	67.4416
TraesCS7D02G283900	-0.48	6.3e-86	-0.659	4.88e-151	-1.187	0	80.4095	79.1208	80.2042	63.5119	63.5875	63.7243	58.8582	58.2665	58.6833	50.1747	50.4942	52.13
TraesCS2B02G354400	0.871	9.59e-86	0.643	1.53e-44	0.231	1.66e-06	8.62899	8.59624	8.80533	18.1994	17.3891	17.2678	15.4866	15.7558	15.8284	14.6143	14.7667	14.9513
TraesCS2B02G421900	-2.303	1.25e-85	-2.334	1.94e-83	-5.12	1.96e-97	3.17959	3.23928	3.13099	0.697198	0.681222	0.770359	0.706739	0.679623	0.806468	0.132864	0.122656	0.143026
TraesCS3D02G275300	-2.11	1.59e-85	-1.304	1.46e-41	-3.844	1.3e-130	3.28223	3.15142	3.44677	0.792207	0.859141	0.888685	1.62188	1.60548	1.40683	0.308017	0.364057	0.326552
TraesCS4A02G445600	-0.563	1.79e-85	-0.599	1.28e-93	-1.347	0	53.2613	53.8666	53.2978	40.3154	40.8203	39.4423	40.836	40.7852	41.0402	29.8146	30.6011	31.1009
TraesCS7A02G560000	-2.296	2.29e-85	-2.713	2.6e-95	-3.055	4.74e-111	21.1764	21.2914	20.5758	4.33883	4.60826	5.30437	3.3526	4.01154	3.77196	3.64659	3.51188	3.84762
TraesCSU02G258100	-1.587	2.36e-85	0.21	0.003045	-3.756	2.69e-172	63.5188	64.2686	66.5244	23.53	22.3554	25.9015	88.1459	86.3042	85.9058	6.857	7.454	6.55621
TraesCS4A02G090900	2.894	3.61e-85	-2.014	1.47e-12	-3.507	5.94e-18	1.00912	1.00928	1.0313	8.06878	8.52459	8.56499	0.276064	0.322106	0.276085	0.0778483	0.12976	0.181572
TraesCS1D02G256700	-2.376	4.73e-85	0.453	7.98e-08	-3.333	1.34e-106	5.01338	4.7372	4.43346	1.00596	1.07619	0.950316	7.47979	7.38682	7.6209	0.722167	0.616545	0.704267
TraesCS5B02G263600	2.694	5.23e-85	2.485	7.94e-71	0.369	0.03346	1.87085	2.17052	1.79724	13.5592	14.7481	13.6345	12.7089	12.7904	12.349	2.98465	4.02516	3.93272
TraesCS5D02G228300	1.482	5.79e-85	-0.371	0.0001468	-5.313	2.4e-65	3.10916	3.54631	3.4158	10.2358	10.6074	10.3907	2.9061	3.10487	3.00556	0.143913	0.127935	0.0959029
TraesCS3B02G268900	0.472	6.67e-85	-0.387	9.9e-47	-1.529	0	121.261	121.202	122.162	187.635	186.805	186.937	107.419	108.055	107.552	60.6065	60.6125	62.1799
TraesCS7A02G169100	1.25	7.41e-85	0.859	1.65e-37	-1.664	2.63e-68	6.17307	5.93226	5.80517	15.6863	15.7274	15.8865	12.591	12.5524	12.4724	2.85396	2.60703	2.74049
TraesCS4D02G077000	1.791	1.32e-84	1.533	1.49e-59	-0.606	5.56e-07	4.83403	4.36472	4.16549	16.9281	17.2237	17.19	14.8552	14.9646	14.9642	4.38179	4.2605	4.09613
TraesCS5B02G294500	-1.376	1.52e-84	-1.149	1.37e-61	-4.065	6.91e-216	12.1365	12.051	11.8302	5.18973	5.20829	5.00686	6.26808	6.54938	5.98786	1.01305	0.992042	1.11812
TraesCS5D02G288700	1.537	1.71e-84	0.474	1.89e-07	-1.918	4.47e-52	3.73519	3.63053	3.50963	11.953	11.4863	11.5862	5.84354	5.95686	5.69364	1.37762	1.52613	1.27113
TraesCS5A02G452600	5.659	1.95e-84	1.11	0.003225	0.338	0.4235	0.287354	0.287398	0.28755	15.9167	16.3815	16.0739	0.718415	0.786912	0.650043	0.424471	0.54029	0.617162
TraesCS5D02G094000	-0.592	2.25e-84	-0.699	1.9e-111	-1.493	0	95.7073	94.2565	95.4397	69.1819	71.3139	69.6787	68.9005	67.5512	67.1572	48.8203	50.2742	47.9959
TraesCS5D02G222300	0.967	2.44e-84	1.345	5.4e-170	2.616	0	42.6618	43.3312	41.945	90.9312	93.5846	93.0994	129.145	125.163	122.053	378.147	375.681	383.998
TraesCS3D02G358500	0.574	2.54e-84	0.364	9.34e-33	-0.928	1.87e-160	33.3625	33.4137	33.8002	55.9611	53.934	56.3435	50.6019	49.4059	49.9476	25.3287	25.5354	25.8378
TraesCS6B02G036400	0.304	2.84e-84	0.043	0.0183	-2.538	0	243.384	241.127	244.293	336.346	332	330.18	287.691	291.695	289.929	61.7981	60.3094	59.9802
TraesCS5D02G019400	1.409	2.85e-84	1.818	5.43e-146	3.532	0	2.05603	2.32979	2.2982	6.72054	6.52361	6.46009	9.21034	9.01201	9.0704	37.3661	37.8325	36.9811
TraesCS7A02G293600	-0.547	3.07e-84	-0.376	5.45e-41	-0.54	7.57e-84	73.3406	72.5928	72.9075	54.3257	56.6164	55.3542	66.1631	64.3952	64.6894	72.5179	73.5537	72.4052
TraesCS4D02G025700	0.699	3.2e-84	0.712	4.92e-86	-0.715	1.54e-64	36.0587	35.9443	36.5633	65.2584	65.4824	64.959	69.2107	67.9006	68.8626	33.111	31.8462	31.0335
TraesCS4A02G214200	-0.908	3.48e-84	-0.367	3.54e-16	0.263	1.81e-10	16.2919	16.3634	16.869	9.45588	9.6444	10.1991	14.914	14.6494	14.9151	28.5434	28.3795	29.2818
TraesCS5B02G145800	0.762	3.5e-84	0.403	2.33e-22	-8.91	5.48e-67	39.4199	39.2034	40.1891	74.8002	74.0084	74.7839	61.6674	60.3223	59.9633	0.0896383	0.134471	0.134403
TraesCS6D02G390000	1.141	3.61e-84	0.054	0.4949	-2.392	1.79e-202	28.9939	27.9865	28.8402	69.8918	68.5301	71.6838	33.8848	34.1979	35.1264	8.73428	8.9448	6.04167
TraesCS2D02G525300	1.299	4.16e-84	-0.661	3.81e-16	-3.523	5.85e-142	5.05925	4.54278	5.04021	13.8932	13.1541	12.9372	3.39707	3.74678	3.57803	0.611459	0.59793	0.638376
TraesCS6D02G350000	-0.488	4.32e-84	-0.481	2.81e-80	-1.378	0	98.3285	97.2087	97.5848	76.3052	76.6206	79.1451	80.4441	80.7746	81.939	54.2979	55.059	54.3318
TraesCS4A02G083700	0.799	4.68e-84	0.062	0.2509	0.226	3.37e-07	8.74786	8.91158	8.34292	16.9193	16.6413	16.6673	10.5601	10.5918	10.2948	14.7278	14.5908	14.8142
TraesCS2D02G393700	1.855	4.78e-84	1.881	1.06e-85	-0.367	0.003072	1.61606	1.64176	1.5535	6.45335	6.74849	6.12555	6.96719	6.91333	6.64046	1.92241	1.78417	1.70641
TraesCS7B02G228500	1.429	6.46e-84	1.28	2.45e-65	-0.027	0.8006	9.7457	8.68171	9.55496	27.4617	28.8335	27.3174	26.9301	26.0025	25.7482	12.78	13.5444	13.5375
TraesCS5B02G417700	-1.214	7.87e-84	-1.511	8.83e-113	-1.299	1.85e-95	7.59237	7.63329	7.57768	3.5917	3.56437	3.75463	3.05596	3.07756	3.13073	4.60007	4.44437	4.40611
TraesCS7D02G290500	-0.537	8.37e-84	-0.731	2.37e-144	-1.526	0	115.412	116.362	119.805	89.9457	88.9281	90.0306	80.6707	82.1956	82.435	59.4575	57.8301	59.8221
TraesCS2B02G553100	1.708	1.07e-83	-1.075	2.29e-18	-4.232	2.04e-58	2.41748	2.58953	2.60522	9.40751	8.91693	9.28648	1.51737	1.30292	1.36421	0.207462	0.190192	0.190096
TraesCS1A02G099000	0.547	1.42e-83	0.848	3.97e-207	-0.08	0.01163	43.4496	42.9631	43.2121	69.2861	70.0984	70.8209	90.3808	88.4964	91.3782	59.341	58.8503	59.714
TraesCS4A02G363500	2.133	2.12e-83	2.338	5e-101	0.744	1.78e-09	3.59526	4.09023	3.64269	18.6123	18.0154	18.5309	22.8245	22.2488	21.237	8.96201	8.90858	9.66419
TraesCS5A02G390200	1.319	2.46e-83	0.516	1.06e-11	-1.336	2.41e-45	8.34614	8.15264	7.76723	22.617	21.9846	22.6228	13.0861	13.7433	13.3554	4.40471	4.90955	4.63819
TraesCS6A02G156000	-1.025	3.69e-83	-0.905	2.2e-65	-1.889	1.49e-220	28.4831	28.1095	27.7936	15.1475	15.334	15.559	18.2708	17.7918	16.121	10.9325	11.0192	11.0993
TraesCS2B02G372000	0.422	4.89e-83	0.593	4.07e-165	-0.829	2.94e-240	79.8467	78.6777	78.5929	117.895	117.956	116.894	137.957	137.835	138.374	64.182	64.1629	65.3535
TraesCS4D02G137000	-0.339	5.08e-83	0.148	3.18e-17	0.504	1.03e-198	779.204	792.039	778.45	684.146	681.917	696.514	1009.61	1000.33	1006.26	1600.57	1586.48	1646.99
TraesCS3D02G194000	0.706	6.85e-83	-0.062	0.1921	-2.327	0	44.8703	46.1081	46.6957	82.6616	84.1069	82.4806	51.6568	49.8908	51.1708	13.3875	12.9638	13.4671
TraesCS5A02G280900	0.859	6.88e-83	-0.002	0.9943	-2.648	2.47e-255	15.6434	15.1751	15.1644	31.3296	30.456	30.7781	17.7095	17.9735	17.489	3.572	3.52685	3.54781
TraesCS2B02G516700	0.339	9.36e-83	0.748	0	1.764	0	105.164	104.845	104.751	148.752	147.444	145.802	202.174	204.912	205.208	514.763	518.265	517.777
TraesCS5A02G222500	0.979	1.01e-82	-0.31	4.96e-07	-2.477	4.39e-180	5.41639	5.55565	5.45703	11.9598	11.9905	11.9983	5.10156	5.11195	5.1316	1.55013	1.30491	1.42688
TraesCS1B02G102700	-0.935	1.14e-82	-0.692	1.06e-47	0.548	7.33e-42	14.3763	14.6542	14.5516	8.21915	8.72433	8.35344	10.5892	10.2062	10.4423	30.952	30.5386	30.9561
TraesCS4A02G272600	-1.054	1.2e-82	-0.936	1.05e-65	-1.485	9.2e-146	18.7365	18.5363	18.3614	9.6802	10.3386	9.71809	11.63	10.7806	11.2551	9.81648	9.37121	9.6564
TraesCS4D02G130600	0.798	1.57e-82	0.847	5.17e-92	-3.353	0	8.54361	8.7348	8.56846	16.5996	16.4325	16.8679	18.0034	18.1272	17.6996	1.18173	1.30806	1.18125
TraesCS3A02G321000	-2.328	1.67e-82	-2.324	3.86e-79	-4.867	2.87e-99	7.13866	6.96886	6.64958	1.52891	1.4202	1.63854	1.52571	1.64793	1.62755	0.229462	0.436021	0.36699
TraesCS3B02G260400	1.399	1.71e-82	3.104	0	0.181	0.04022	32.8254	33.6234	33.6413	100.184	94.7445	98.0812	334.215	333.058	329.312	55.005	53.8605	55.749
TraesCS5A02G096100	0.468	1.83e-82	-0.15	3.56e-08	-0.843	2.5e-204	101.642	100.368	99.8217	156.149	151.719	155.528	106.209	104.71	104.097	80.9661	81.9886	81.1868
TraesCS6A02G355300	0.655	2.23e-82	0.261	1.08e-12	-0.797	1.38e-89	30.2047	30.517	30.5743	52.4878	53.1945	53.9171	41.3279	42.2548	43.1547	25.1547	25.0333	26.0611
TraesCS4B02G101800	-0.906	2.23e-82	-0.515	3.23e-29	0.108	0.01576	21.1715	19.7968	20.2827	12.0839	12.4222	11.7681	16.0337	16.6122	16.9851	31.6163	31.696	32.4834
TraesCS6D02G153100	-0.435	2.4e-82	-0.155	1.68e-11	-2.431	0	74.2512	73.9671	74.5198	60.9589	60.7119	61.1833	77.7259	76.5506	77.4818	19.7668	20.0318	20.1344
TraesCS4D02G343400	-0.687	2.71e-82	-0.573	1.42e-57	-1.336	2.54e-260	51.3071	50.8672	51.0436	36.3599	34.6553	34.6045	40.2647	39.5757	39.4682	29.7574	29.2793	29.0542
TraesCS6D02G222300	1.319	3.18e-82	-0.037	0.7417	-2.677	1.24e-96	5.37229	5.1952	5.25136	14.6324	14.4157	14.7556	6.02312	5.69965	6.13794	1.09649	1.20411	1.28946
TraesCS6B02G233800	0.641	6.1e-82	-0.02	0.6836	0.18	4.51e-07	17.0924	17.3371	17.7098	30.196	30.2763	29.7975	20.2596	19.6389	19.6385	28.4557	28.7511	28.5173
TraesCS4D02G191200	3.579	6.6e-82	3.734	2.59e-89	4.108	1.21e-110	1.08537	1.18422	1.18485	15.4187	15.7553	14.6657	17.1799	18.6618	17.3926	28.9186	27.7289	29.8009
TraesCS6D02G206100	-0.418	8.65e-82	-0.154	3.63e-12	-2.036	0	49.9422	49.4604	49.4207	41.3548	41.1435	41.1398	51.878	51.0661	51.9727	17.7918	17.6456	17.2274
TraesCS4D02G303800	-1.609	9.21e-82	-1.81	5.47e-93	-2.382	8.72e-137	11.9787	11.914	12.4521	4.56377	4.26809	4.39509	4.17547	3.63016	4.1995	3.15772	3.53272	3.42394
TraesCS7A02G267900	0.78	9.94e-82	-0.121	0.01582	-2.116	1.01e-265	69.1381	69.8162	71.9235	135.186	134.913	131.893	74.7233	73.0143	76.8027	24.0356	22.5861	23.9453
TraesCS7D02G506800	-1.933	1.09e-81	-1.308	8.72e-46	-1.65	2.16e-68	6.3446	6.4261	6.3006	1.72902	1.83773	1.97654	3.0022	3.01974	2.89889	2.822	2.84175	3.15158
TraesCS5B02G243100	-0.936	1.16e-81	-0.579	1.7e-34	1.953	0	16.3241	15.9079	16.3855	9.83918	9.23248	9.1353	12.4678	12.7561	12.4687	91.7661	90.6217	90.7782
TraesCS1A02G260700	3.398	1.33e-81	3.305	1.47e-76	2.228	1.8e-33	0.712464	0.712573	0.765763	8.82875	8.73062	8.07192	7.80351	8.8505	8.42616	5.07081	4.561	5.26003
TraesCS3A02G103100	1.529	1.38e-81	0.189	0.07035	-2.061	2.53e-55	6.20555	5.9607	6.73241	20.2919	20.2106	20.032	8.29491	8.22988	8.4272	2.41337	2.11655	2.04125
TraesCS7A02G427000	3.22	3.05e-81	1.766	7.63e-22	4.233	1.53e-146	0.885252	0.755183	0.703476	8.33699	8.04027	7.86476	3.01296	2.98536	3.23638	20.2969	21.5263	22.1445
TraesCS6D02G005000	-0.609	3.06e-81	-0.607	1.08e-78	-1.344	0	81.9044	81.982	82.6108	58.3686	59.8845	61.1252	61.8591	63.1185	62.4556	46.3338	47.1631	47.4533
TraesCS2A02G235000	-0.535	3.19e-81	-0.662	7.49e-119	-2.082	0	171.286	170.985	166.415	128.445	130.018	131.378	123.943	121.547	126.798	55.8528	58.871	59.5818
TraesCS2D02G561700	-0.798	3.22e-81	-0.7	1.31e-62	-1.102	2.52e-144	23.3589	23.4377	22.6825	15.0109	14.4824	14.8705	16.1001	16.6819	16.7621	15.4519	15.9443	15.5728
TraesCS5D02G276300	5.285	5.97e-81	2.333	2.48e-14	5.789	2.55e-98	0.31791	0.264966	0.185575	11.2259	11.0774	10.9493	1.50446	1.56139	1.41941	20.2359	20.7822	20.6437
TraesCS1D02G214300	1.232	7.69e-81	1.467	2.01e-116	0.011	0.913	4.89342	4.7811	4.84829	12.6029	12.6228	12.6526	15.245	15.8003	15.4365	6.83155	7.06648	7.33606
TraesCS5A02G466100	0.47	9.98e-81	-0.443	2.86e-58	-1.892	0	39.091	38.4085	38.2075	59.0304	59.4047	59.4699	32.8494	32.9712	32.7597	14.753	15.3785	15.1034
TraesCS2D02G271600	-0.393	1.08e-80	-0.667	2.26e-212	-1.468	0	76.8096	76.0522	76.8373	65.1345	64.7648	64.2593	56.4123	55.9792	55.1141	40.3075	39.6819	40.456
TraesCS4A02G203800	-0.462	1.28e-80	-0.544	4.99e-107	-0.439	7.03e-75	54.2662	55.7252	54.3902	44.2151	43.9333	44.3454	43.3329	43.8287	43.4159	58.5283	59.748	57.6209
TraesCS3B02G107200	-1.118	1.46e-80	-0.49	1.21e-18	0.174	0.0008573	32.4279	34.6162	32.3707	17.1612	17.053	16.6328	28.2813	26.2425	27.4328	55.2145	53.1091	54.4728
TraesCS2D02G257100	-3.185	1.46e-80	-2.907	7.71e-73	-4.026	2.27e-87	13.5447	11.9505	13.1224	1.57145	1.6961	1.44776	2.07987	1.7565	2.12624	0.886281	1.35562	1.1986
TraesCS6D02G082300	2.252	1.47e-80	1.596	1.56e-37	2.607	4.62e-112	0.744679	0.802979	0.873268	4.32808	4.22917	4.23994	3.01707	2.81787	2.64325	7.12981	7.0602	7.21126
TraesCS1A02G030000	0.37	1.57e-80	0.249	2.31e-35	-1.181	0	174.646	174.137	176.409	249.331	251.442	252.769	240.759	240.854	240.992	110.742	111.36	114.097
TraesCS6D02G132500	0.775	1.9e-80	-0.186	0.0001577	0.235	7.35e-08	19.6694	19.4857	19.1223	36.8781	37.1894	36.6488	20.0526	19.5432	19.7429	32.6745	32.7279	34.1402
TraesCS4D02G344300	0.678	2.08e-80	1.121	2.82e-230	0.589	5.08e-61	45.3424	47.2076	47.1612	81.7655	83.3018	83.0543	116.845	119.268	115.858	104.981	99.5493	100.362
TraesCS4D02G223900	-0.82	2.52e-80	-0.427	3.4e-24	-0.559	1.54e-41	62.8868	62.8505	63.1594	38.5653	40.5143	39.7188	54.0625	53.1831	55.4428	61.7573	61.209	63.1176
TraesCS7D02G407100	0.602	3.07e-80	0.362	5.53e-28	-2.143	0	51.3522	52.2655	52.2084	88.2621	86.9092	87.3082	79.2749	75.4322	77.2495	17.1317	17.2702	16.783
TraesCS3A02G360500	-0.842	3.23e-80	-0.299	5.35e-12	-3.112	0	73.3153	71.6347	73.1539	45.6074	44.9643	44.4533	67.9077	68.9339	68.4792	11.4993	13.1616	11.9417
TraesCS5D02G138800	-0.633	3.36e-80	-1.223	4.08e-244	-1.241	8.75e-263	34.942	34.625	34.1889	24.9587	24.6723	24.6279	17.1735	17.3164	16.9707	21.8502	21.1795	20.6909
TraesCS3B02G185100	-0.722	4.18e-80	-0.615	2.05e-58	-1.315	3.76e-225	60.8107	61.4751	60.9558	41.245	41.3916	40.6606	46.6516	46.8778	45.0297	35.2895	35.2097	36.3581
TraesCS3D02G289100	0.841	4.65e-80	1.04	4.45e-124	0.945	2.89e-104	6.04519	6.51052	6.37371	12.8003	12.4435	12.3919	15.0667	14.9461	15.049	17.9478	17.5366	17.4113
TraesCS4A02G043500	1.013	4.84e-80	1.248	1.34e-123	-2.639	3.84e-160	6.45431	6.4817	6.57761	14.5011	14.5188	14.6947	17.6356	17.7929	18.2451	1.51547	1.37203	1.65836
TraesCS5D02G311200	0.845	5.47e-80	0.469	2.92e-23	-0.795	7.32e-50	44.4393	43.2526	44.5835	85.9147	87.7432	90.1329	71.6061	70.2125	70.2718	36.8822	37.0232	36.7299
TraesCS3B02G270200	0.884	6.23e-80	0.578	2.62e-32	0.39	2.04e-15	8.39053	8.47884	8.11018	16.8981	17.0113	17.2719	14.1446	14.1727	14.8783	15.6093	15.9414	15.9483
TraesCS6D02G065100	-4.522	6.63e-80	-3.141	6.18e-77	-10.892	1.5e-19	4.49163	4.68147	4.58933	0.226634	0.256942	0.181354	0.624802	0.641751	0.54041	0	0	0
TraesCS6A02G053000	0.957	7.02e-80	1.092	2.27e-104	-1.663	5e-118	37.1994	38.3946	39.2085	84.3737	81.6785	81.3542	94.8669	95.655	92.8915	17.9677	16.6916	17.9604
TraesCS4A02G012300	1.104	8.21e-80	-0.21	0.004449	-6.593	1.98e-76	10.3268	10.3748	11.0073	25.1842	25.3933	25.1017	10.4682	10.3697	10.9165	0.140235	0.168299	0.168214
TraesCS5B02G414300	-1.725	1.34e-79	-1.985	4.15e-94	-10.924	1.04e-19	14.4442	15.2931	14.8905	4.94373	4.69942	5.33864	3.98597	4.8936	4.1787	0.0310074	0	0
TraesCS3D02G339300	-0.878	1.49e-79	-0.198	1.58e-05	-2.181	0	55.6366	55.8249	54.3256	33.907	33.1	33.1401	55.1832	56.5851	55.5725	17.1636	18.0344	17.8625
TraesCS7B02G084300	1.809	1.73e-79	0.772	1.3e-12	4.29	0	3.52882	3.80348	3.77122	14.616	13.9311	14.6526	7.37853	6.71843	7.85634	106.54	104.687	103.889
TraesCS5A02G513200	-1.137	2.19e-79	-0.693	5.92e-33	-2.622	9.27e-243	12.3948	12.6304	12.4033	6.00434	6.37047	6.52388	9.1354	8.80777	8.87014	2.77022	3.17636	2.87492
TraesCS2D02G027100	1.524	2.27e-79	1.272	4.51e-53	-1.882	6.94e-48	3.20053	2.77942	2.984	9.65389	9.53748	9.43181	8.38083	8.48203	8.21416	1.0944	1.13225	1.30143
TraesCS4B02G321200	1.98	2.37e-79	0.975	2.93e-17	-2.96	3.44e-37	2.10818	2.19039	2.06866	9.63446	9.06859	9.18552	4.82476	4.86909	4.80318	0.321585	0.470055	0.395636
TraesCS5A02G558200	2.825	2.54e-79	0.229	0.3091	1.454	1.45e-19	0.438306	0.479152	0.418206	3.54724	3.48005	3.47973	0.524243	0.622599	0.666275	1.92183	1.7865	1.60088
TraesCS4D02G327300	0.722	2.72e-79	0.326	1.29e-15	-0.783	6.85e-71	27.7676	26.8727	26.3473	48.3187	50.0981	49.9211	40.2618	37.8682	39.43	22.1881	23.301	22.8307
TraesCS1D02G313800	-0.226	3.4e-79	-0.443	5.3e-286	-2.447	0	283.874	282.869	284.636	271.058	269.589	267.58	240.655	243.231	241.478	75.9889	74.8998	75.7526
TraesCS4A02G064200	1.752	4.18e-79	0.361	0.001635	-2.448	2.28e-45	1.68535	1.77174	1.7973	6.46287	6.73648	6.45274	2.67577	2.55739	2.58369	0.431171	0.550169	0.416134
TraesCS2D02G097500	0.559	4.97e-79	0.861	2.12e-193	0.573	9.27e-85	66.3483	65.7779	66.3937	107.426	106.628	110.584	138.1	140.834	138.654	143.629	142.854	142.168
TraesCS4D02G263500	1.302	6.51e-79	1.58	9.66e-119	-0.34	5.88e-05	9.09173	8.84641	10.2264	26.0469	25.5829	25.4454	32.5096	32.324	32.7008	10.9456	10.9893	10.3452
TraesCS4D02G039200	-0.782	6.7e-79	-0.555	2.07e-41	-1.358	1.24e-202	46.5427	46.7014	46.9385	29.2236	29.9894	31.2651	36.6553	36.7238	37.1451	26.9904	25.931	26.4304
TraesCS7B02G229300	-2.025	8.81e-79	-1.934	9.87e-72	-2.129	5.37e-86	13.1377	12.3205	12.863	3.3828	3.71634	3.35346	4.18588	4.01749	3.40972	4.41695	3.8081	4.49129
TraesCS2A02G129600	-0.485	1.02e-78	-0.475	3.93e-74	-1.506	0	55.6275	55.839	55.7961	43.6973	44.4634	44.5149	47.4249	45.8604	46.0458	28.14	28.5809	28.7066
TraesCS6A02G159400	-0.375	1.05e-78	-0.288	1.64e-46	-1.696	0	113.118	112.204	112.569	95.637	96.3942	97.1244	107.715	106.125	106.673	49.8728	51.9933	49.4259
TraesCS1D02G001600	-0.434	1.09e-78	-0.686	3.16e-179	0.05	0.03198	69.0266	71.1569	71.2405	58.0471	58.1259	57.5649	50.4994	51.0599	50.6666	105.834	105.476	106.399
TraesCS4A02G320500	1.884	1.12e-78	1.753	1.67e-66	1.029	4.6e-22	2.58348	3.04898	2.66281	11.2692	11.2483	11.4703	10.8234	11.0459	10.5197	8.43045	8.40006	7.74038
TraesCS5B02G431100	1.016	1.42e-78	1.426	1.06e-161	1.866	6.95e-297	23.5479	23.8748	23.8875	53.8285	52.6071	53.6357	73.672	74.5453	73.7352	128.883	121.862	126.488
TraesCS6B02G301300	-0.52	1.5e-78	-0.455	5.56e-60	-1.702	0	55.1022	54.2323	55.3258	42.9015	42.0258	42.5725	46.8271	46.2165	46.0344	24.6547	24.5347	24.2367
TraesCS5B02G313900	1.728	1.5e-78	0.399	0.0003716	-0.916	2.1e-13	4.90481	5.34817	5.1665	18.8086	18.8152	19.0964	7.8238	7.82456	7.90342	3.8331	3.87806	4.14342
TraesCS1D02G281800	2.217	2.07e-78	-0.106	0.5841	0.622	4.43e-06	1.97852	1.76425	1.76519	9.23248	9.7615	9.44059	1.86452	1.96688	2.09455	4.26388	3.94736	4.08936
TraesCS7D02G108900	1.335	2.09e-78	1.361	1.46e-80	4.114	0	4.67119	4.32744	4.45898	12.5678	12.5929	12.5298	13.4237	13.6326	12.9865	112.782	112.403	112.944
TraesCS1D02G036900	2.09	2.15e-78	1.83	5.45e-58	1.924	2.32e-66	2.12059	2.25183	2.14824	10.5915	10.1433	10.0922	9.11668	9.28589	8.44407	11.992	11.4552	12.4616
TraesCS6A02G386500	-0.681	2.16e-78	-0.898	4.82e-125	-3.074	0	62.1541	60.7104	60.7427	42.2163	42.8567	42.0566	37.7783	38.3857	37.9082	10.6443	10.9321	10.0668
TraesCS7D02G180600	1.979	2.28e-78	1.138	5.37e-23	4.799	0	2.07066	2.1928	1.85268	8.80453	8.8777	9.08712	5.27258	5.09036	5.22076	82.5561	82.7705	81.7869
TraesCS4A02G293000	0.399	3.28e-78	1.038	0	-1.841	0	110.928	112.638	113.713	164.897	164.603	164.345	267.202	267.59	267.01	45.7003	46.182	44.762
TraesCS6A02G173100	0.455	4.56e-78	-0.133	1.21e-06	-1.31	0	148.4	150.434	151.928	227.375	225.976	232.4	159.327	159.848	157.046	87.4273	86.9703	89.4603
TraesCS2D02G254700	-0.447	5.23e-78	-0.219	7.76e-20	-2.681	0	99.3557	100.101	99.3426	82.1072	82.0581	79.2112	99.6989	98.383	99.2065	22.5014	22.5527	22.5413
TraesCSU02G047800	2.216	5.35e-78	-0.927	8.21e-08	-2.901	4.25e-30	1.43071	1.26646	1.49752	7.23637	7.28622	7.11208	0.898639	0.722506	0.93395	0.218629	0.258405	0.337744
TraesCS2A02G309900	-0.737	6.31e-78	-0.58	3.45e-49	-1.161	1.03e-173	19.0195	19.5527	19.5518	12.8588	12.7767	13.0676	14.9881	14.8928	15.1584	12.4342	12.2036	13.0833
TraesCS2A02G167300	1.182	7.13e-78	1.385	3.25e-108	1.392	2.1e-112	2.4734	2.73058	2.67208	6.64595	6.49233	6.70511	7.89555	7.88715	8.0337	9.99208	9.85859	10.1431
TraesCS1D02G237500	0.382	7.92e-78	0.421	2.39e-93	3.211	0	76.264	77.1776	76.1873	112.387	109.625	110.171	119.421	118.719	118.003	1029.96	1028.32	1026.56
TraesCS3B02G240500	-0.566	8.1e-78	-0.581	1.03e-79	-2.036	0	100.791	99.7819	99.9717	76.2603	75.5663	73.4632	76.6324	78.5431	77.4799	34.7987	35.0498	36.4763
TraesCS6A02G258500	1.113	8.32e-78	1.257	1.01e-99	-0.299	2.42e-05	11.9466	11.3809	11.7754	27.1149	28.8716	28.2961	31.5531	32.5483	33.0596	13.6445	14.0429	13.7111
TraesCS6B02G253200	2.437	9.77e-78	0.228	0.227	-0.799	1.54e-05	0.41779	0.379283	0.385917	2.32306	2.43483	2.35448	0.537182	0.523459	0.544109	0.326269	0.349608	0.310606
TraesCS5D02G338200	-0.397	9.87e-78	-0.536	1.13e-133	-4.246	0	148.657	147.041	147.321	123.979	124.844	124.543	118.415	116.995	118.451	10.9988	10.9694	11.908
TraesCS3B02G125500	-2.245	1.04e-77	-1.499	1.28e-44	-3.396	8.29e-106	7.7031	8.27321	7.70838	1.74964	1.93209	1.86373	3.17449	3.1494	3.37791	1.11719	1.1173	1.03084
TraesCS5D02G216300	-0.439	1.16e-77	0.037	0.1656	-0.364	1.42e-55	143.262	142.088	145.6	119.499	115.512	117.765	173.248	169.618	169.351	161.769	162.229	161.851
TraesCS2A02G493700	-0.797	1.25e-77	-1.131	1.06e-138	-1.86	0	27.1943	26.2487	27.6552	17.6106	17.0202	17.1913	13.9287	14.5792	14.3859	10.8435	10.5279	11.0369
TraesCS3D02G289600	1.038	1.27e-77	-0.487	7.95e-13	-2.946	5.32e-166	4.19891	4.28491	4.21886	9.68719	9.74787	9.51783	3.46571	3.54836	3.48426	0.845798	0.711778	0.835144
TraesCS6D02G282000	0.652	1.34e-77	0.44	7.4e-34	-2.69	0	43.728	45.7879	45.1927	78.2198	78.4034	78.3337	70.2104	71.0902	70.2855	10.1997	9.72812	10.3531
TraesCS2B02G160400	-2.055	1.38e-77	-1.494	1e-48	-11.255	7.57e-21	6.22327	6.00902	6.36003	1.66608	1.55555	1.74586	2.66013	2.44756	2.53618	0	0	0
TraesCS5D02G378600	2.229	1.51e-77	-2.79	2.47e-28	-8.264	1.06e-11	3.74034	3.82136	3.50142	20.0882	19.4009	18.0879	0.603306	0.603365	0.646448	0	0.048613	0
TraesCS7D02G267000	0.604	1.55e-77	-0.244	4.16e-11	-2.006	0	58.7859	59.2312	60.0994	100.341	100.795	99.4607	58.2353	57.7345	58.1617	21.6177	21.4441	21.3015
TraesCS3B02G151600	-2.491	1.66e-77	-2.122	6e-63	-3.668	6.09e-98	28.3281	26.2897	29.0584	5.44856	5.6208	5.44997	7.51685	7.80307	6.94647	3.32713	2.89811	3.32578
TraesCS6B02G320900	0.518	2.2e-77	0.331	1.07e-30	-0.745	7.29e-126	53.6051	53.2858	54.1539	85.2973	86.4264	84.2202	79.0163	78.8267	76.7632	47.743	45.0511	46.6109
TraesCS7D02G448000	-1.027	2.25e-77	-0.895	1.57e-59	-1.187	2.08e-100	43.725	42.5784	44.4934	23.3027	24.5494	23.3972	27.2304	26.64	27.5784	28.374	26.9831	28.0282
TraesCS2A02G197900	0.915	2.6e-77	-0.228	0.0001267	-2.88	1.96e-222	18.1903	18.1409	17.1059	37.5546	36.8419	37.4392	17.9525	17.2831	17.5903	3.43808	3.69078	3.40515
TraesCS3B02G309100	-1.553	2.68e-77	-1.449	1.66e-67	-2.476	5.35e-138	3.59835	3.67888	3.66628	1.40775	1.40824	1.32446	1.51885	1.59689	1.52675	0.931291	0.99289	0.930913
TraesCS4D02G018500	0.328	2.71e-77	0.996	0	-0.775	0	265.638	265.216	266.63	370.133	371.482	369.821	614.552	617.586	609.642	220.942	224.831	230.445
TraesCS1D02G043300	-0.851	2.86e-77	-0.612	4.39e-42	0.813	8.86e-105	33.2716	32.8935	33.7663	20.5112	20.4619	20.5165	25.0716	25.232	25.4209	86.2296	84.6352	83.8448
TraesCS3B02G277900	-1.759	3.18e-77	-1.026	5.06e-33	-2.782	3.46e-127	7.86499	7.31199	7.65573	2.57047	2.45137	2.46828	4.23272	4.38637	4.36712	1.66348	1.59883	1.55483
TraesCS7A02G504400	-1.244	3.27e-77	-1.543	2.59e-104	-5.113	1.13e-197	16.0611	16.1057	15.7772	7.14381	7.59043	7.73103	6.47315	6.09032	6.49619	0.636024	0.686974	0.686627
TraesCS3A02G381000	-0.181	5.26e-77	-0.537	0	-3.278	0	801.086	807.557	806.421	788.167	787.084	789.701	640.776	642.99	644.399	120.457	120.398	120.408
TraesCS5A02G312500	1.831	1.01e-76	-0.149	0.3062	-1.315	6.54e-21	2.43543	2.2159	2.18323	9.12843	9.16406	8.69289	2.33768	2.19292	2.60969	1.4104	1.16523	1.40983
TraesCS6D02G251900	-0.784	1.06e-76	-0.605	6.04e-47	-1.158	2.24e-152	13.399	13.2671	12.9702	8.50368	8.31818	8.73714	10.0976	10.0316	10.06	8.4101	8.58369	8.7844
TraesCS3D02G244900	2.38	1.44e-76	0.193	0.3106	1.08	1.05e-14	2.75253	2.79808	3.07049	15.9626	17.3529	16.4859	3.4811	3.91662	4.01323	8.72576	8.45392	9.26736
TraesCS2A02G348500	-0.304	1.72e-76	-0.486	7.1e-184	-2.541	0	80.0155	80.7673	80.5583	72.7801	71.8398	72.3537	66.2375	66.7161	66.5544	20.0715	20.5109	19.5977
TraesCS3A02G374000	2.268	1.81e-76	2.542	2.41e-97	2.474	1.62e-93	1.1392	0.875175	1.12346	5.55565	5.51009	5.7154	7.19994	7.05911	6.89972	8.20117	8.52128	8.57682
TraesCS4B02G189800	3.663	2.64e-76	4.085	6.71e-96	4.13	2.88e-99	0.888029	1.08554	1.03674	13.8106	14.3359	14.1926	20.1401	20.0363	18.9786	25.9373	24.6876	25.8672
TraesCS5A02G177400	-0.378	2.92e-76	-1.163	0	-3.236	0	75.3923	74.2732	75.0845	63.7693	64.0753	64.191	38.7038	39.2963	38.2312	11.2239	11.5953	11.7937
TraesCS6D02G121900	-5.503	4.16e-76	2.151	7.72e-248	-7.878	3.59e-33	8.05272	8.35133	7.85988	0.190031	0.213859	0.19008	41.5485	42.296	40.994	0.0598922	0.0299491	0.059868
TraesCS2A02G406900	1.729	4.31e-76	2.347	4.65e-147	-6.838	2.4e-20	1.51031	1.56007	1.64761	5.8391	5.69868	5.82874	9.23203	9.08701	9.48476	0.0149619	0.0299268	0.0149559
TraesCS7D02G288900	-0.644	5.01e-76	-0.46	7.49e-40	-0.328	4.17e-22	56.6471	57.7572	59.4188	39.9698	41.6735	41.7964	47.9762	47.8865	50.4342	67.1325	65.7549	68.0366
TraesCS5A02G403600	-1.323	5.21e-76	-1.136	7.21e-58	-3.031	2.12e-198	21.9849	21.6473	21.3177	9.4109	10.0026	9.41333	11.5407	11.3227	11.359	4.03712	3.99632	3.50016
TraesCS3D02G258300	0.852	5.44e-76	0.015	0.836	-3.092	1.5e-283	5.94901	5.62903	5.93971	11.7717	11.4809	11.8388	6.56043	6.93353	7.01216	0.953275	0.993767	1.03364
TraesCS1A02G425000	-0.595	8.65e-76	-0.555	4.6e-65	-1.433	0	47.0277	46.7152	46.5142	34.5931	34.5331	33.9168	36.2252	37.8206	36.4899	25.1576	24.7282	25.5108
TraesCS2D02G376300	1.22	8.68e-76	1.615	1.46e-137	-0.438	5.95e-08	8.24459	8.95012	8.36768	21.8835	22.3695	21.861	29.6139	30.7172	30.3392	9.32609	8.93692	9.10963
TraesCS5D02G447500	1.151	9.27e-76	1.188	5.7e-80	1.572	3.27e-150	7.04839	6.66124	6.86922	16.9223	17.3984	16.4173	18.4317	18.1708	17.7106	30.2721	28.5712	29.939
TraesCS2B02G487400	-2.24	9.87e-76	-0.454	4.66e-06	-4.047	3.46e-103	5.22548	4.6825	5.06281	1.24515	1.10075	1.17306	4.45004	4.04589	4.15908	0.365057	0.474622	0.474382
TraesCS3A02G151100	0.806	1.02e-75	-0.438	2.19e-17	-0.716	3.87e-44	23.7274	23.869	22.6945	45.6792	45.4306	45.2941	20.2499	19.4537	20.3993	21.1075	20.8428	20.1323
TraesCS7B02G088100	-0.78	1.06e-75	-0.703	2.47e-61	-2.304	0	24.8602	25.1325	25.0414	16.4272	16.0754	16.0025	17.1615	17.9463	18.2654	7.78637	6.83177	7.42288
TraesCS5B02G256400	0.252	1.14e-75	-0.01	0.6	-1.186	0	1054.92	1067.03	1059.19	1397.02	1411.11	1396.57	1226.54	1223.86	1208.71	666.414	686.141	676.574
TraesCS3A02G345200	-0.87	1.2e-75	-0.206	9.58e-06	-2.092	1.06e-284	17.3668	17.0593	17.6003	10.6181	10.4802	10.5076	17.453	17.2331	17.5334	5.76495	5.85478	6.08375
TraesCS5B02G172200	1.667	1.32e-75	-1.994	1.83e-39	-10.091	5.87e-17	6.45961	7.02239	6.62463	23.1938	23.6637	24.0078	1.93453	1.93472	1.97766	0	0	0
TraesCS4D02G026300	1.393	1.33e-75	1.967	1.7e-158	-1.278	4.6e-33	5.73396	6.17598	5.79306	17.7861	16.682	17.1563	26.6133	26.5568	26.9697	3.66493	3.29876	3.63014
TraesCS1D02G087600	1.062	1.35e-75	1.433	4.07e-143	2.697	0	6.20052	6.59352	6.41873	14.8608	14.8319	14.8476	19.9693	20.2958	19.818	61.2435	60.302	59.2383
TraesCS7D02G289900	-0.288	1.36e-75	-0.498	2.41e-212	-0.796	0	246.151	246.679	249.887	226.689	223.595	225.171	202.377	203.586	203.01	204.876	206.083	209.589
TraesCS3D02G334500	-0.646	1.38e-75	-0.587	4.38e-62	-0.941	3.76e-151	36.9767	36.5721	35.7549	25.528	25.2798	26.7448	28.1596	28.2469	27.8406	28.3506	27.0759	27.2147
TraesCS3A02G073300	-0.334	1.4e-75	-0.308	3.46e-63	-1.1	0	179.455	179.726	180.213	159.485	157.385	158.168	167.438	169.391	167.921	121.51	121.641	121.993
TraesCS5A02G396700	1.064	1.48e-75	0.497	1.72e-15	-1.249	1.74e-61	9.3738	9.68984	10.2826	23.0593	22.4439	22.6228	15.7285	15.5278	16.7184	6.08276	6.00732	5.82695
TraesCS2A02G504300	-0.442	1.81e-75	-0.371	4.71e-53	-1.634	0	91.1745	91.4433	90.1956	73.4401	74.362	75.1494	81.3069	80.9734	82.0412	42.5064	42.9983	42.053
TraesCS5B02G232600	-1.306	2.15e-75	-1.234	7.67e-67	-1.678	6.39e-112	15.0841	15.2025	14.3746	6.65201	6.58757	6.80949	7.68328	7.28616	7.01245	6.70326	6.61977	6.92482
TraesCS2A02G523300	1.411	2.38e-75	-0.377	9.44e-05	-3.772	2.16e-95	2.90361	3.05298	3.11846	9.21762	8.38444	9.1894	2.66669	2.74673	2.67829	0.385636	0.321396	0.256987
TraesCS5D02G287800	0.981	2.62e-75	0.26	2.2e-05	-1.847	5.37e-120	10.2662	10.2086	10.0563	22.5365	22.072	22.2778	13.9769	14.3584	14.0202	4.26291	3.92989	4.11835
TraesCS6A02G389300	-0.63	2.66e-75	-0.346	2.65e-24	-1.975	0	26.7448	26.9716	27.0602	19.212	19.634	19.1102	24.4281	24.8017	24.3769	10.0469	10.2423	9.53475
TraesCS6D02G239700	1.056	3.05e-75	1.188	1.29e-95	-0.337	8.01e-07	13.3779	12.6136	12.78	30.1805	29.7623	29.5453	33.9708	34.1451	34.2128	14.8565	15.3211	14.349
TraesCS2A02G527800	-1.263	3.99e-75	-1.534	1.9e-97	-0.986	2.61e-51	11.5286	11.6318	10.9444	5.29926	5.22005	5.25199	4.65487	4.45607	4.52842	8.5807	7.90729	8.49554
TraesCS7A02G534400	1.046	4.08e-75	0.372	5.41e-09	-0.558	2.72e-16	8.45438	8.11133	8.91955	19.4925	19.3709	19.5709	12.8912	12.6465	12.6462	8.46101	8.06881	8.59623
TraesCS5B02G372500	1.6	4.28e-75	1.166	2.11e-37	0.424	1.92e-05	3.15359	2.81684	3.05651	10.1727	10.0621	10.1373	8.01181	7.67254	7.77863	5.89691	5.7057	5.9664
TraesCS7A02G480700	0.433	4.31e-75	-0.264	2.92e-24	-1.927	0	73.0678	74.6361	74.308	110.95	110.574	111.083	71.6637	71.8098	70.6959	28.4347	28.1761	28.1358
TraesCS3D02G105900	0.966	5.11e-75	0.521	1.61e-20	-0.453	1.69e-13	22.6704	23.357	24.3948	51.5714	51.3438	49.7424	38.3345	40.031	38.6576	25.3869	25.2863	23.984
TraesCS5A02G300400	0.586	5.67e-75	0.672	2.47e-98	0.657	5.82e-97	34.6136	34.3074	34.4814	57.6018	57.2166	57.446	64.6172	62.6927	63.5017	79.124	77.4648	80.0594
TraesCS4A02G172000	-0.553	5.86e-75	-0.891	4.94e-172	-1.021	3.64e-228	39.6408	39.2317	38.8516	29.6478	29.466	29.9847	24.4571	24.3368	24.7349	28.5901	27.5032	28.0599
TraesCS1D02G131200	-0.523	6.85e-75	-0.765	2.32e-146	-1.629	0	52.321	51.2614	50.8032	39.3987	40.0174	39.8586	34.9534	35.4075	34.8694	24.6099	23.7912	24.0528
TraesCS7B02G116800	-0.475	7.58e-75	-0.322	2.99e-35	0.275	1.16e-30	41.6688	41.4084	40.593	32.8785	32.5993	33.2824	37.8772	38.5567	38.14	72.6538	72.4851	71.965
TraesCS7A02G260800	0.582	7.64e-75	-0.226	4.62e-10	-0.3	8.72e-18	30.7409	30.8898	31.3753	51.8374	51.0774	51.6433	30.33	31.4922	30.2743	37.0008	35.8494	36.7897
TraesCS4A02G248200	0.86	1.05e-74	-0.336	1.34e-09	-1.776	4.1e-162	10.0444	9.99443	10.5152	20.8637	20.6487	20.0664	9.58951	9.16268	9.28665	4.42007	4.45165	4.07602
TraesCS4B02G043000	-1.291	1.17e-74	-0.7	6.23e-26	-2.307	8.33e-165	7.22719	6.8921	7.35548	3.17963	3.25596	3.30938	5.11447	4.97089	5.22292	2.08551	2.15343	2.05759
TraesCS3A02G531400	0.313	1.18e-74	0.597	2.94e-277	-0.082	7.73e-06	338.851	339.723	338.455	461.064	472.658	469.282	589.672	594.281	597.525	463.722	468.493	462.368
TraesCS3B02G154900	1.312	1.26e-74	0.524	5.32e-11	-1.048	1.12e-28	2.62633	2.74986	2.75133	7.64198	7.49707	7.26028	4.44092	4.68321	4.40827	1.85987	1.97166	1.87151
TraesCS2A02G002900	1.758	1.28e-74	-0.279	0.03674	-4.87	1.24e-40	2.40479	2.40516	2.40644	9.13819	8.70687	9.2408	2.25925	2.27815	2.35279	0.126366	0.0842524	0.147367
TraesCS4B02G010100	0.8	1.36e-74	-0.488	9.59e-23	-5.185	1.51e-304	19.5529	21.1686	19.974	38.7593	39.0984	39.4529	16.895	17.2967	15.9323	0.738488	0.841139	0.840714
TraesCS3D02G076400	1.183	1.37e-74	1.315	2e-92	-0.263	0.0008195	4.63346	4.46973	4.60672	11.4203	11.3669	11.7672	13.1162	13.1335	13.2453	5.72643	5.49214	5.36296
TraesCS1D02G305000	-1.218	1.53e-74	-0.878	4.65e-42	-1.903	7.88e-145	36.4378	34.5611	36.4627	17.0401	16.9458	17.2952	22.7419	22.8002	22.1834	13.7739	13.9016	14.0209
TraesCS5D02G485800	2.266	1.67e-74	-0.1	0.6209	-3.965	1.56e-27	1.70423	1.33225	1.54858	8.39445	7.77744	8.30269	1.67912	1.67928	1.59528	0.14205	0.142064	0.141993
TraesCS5D02G428400	0.594	1.7e-74	0.618	1.3e-79	0.415	2.29e-36	18.0711	17.4571	17.2791	29.9721	29.5284	29.0083	30.6547	31.6962	31.542	34.112	34.0222	34.0183
TraesCS2A02G487900	0.794	2.45e-74	0.45	1.36e-22	-0.877	3.41e-62	20.5204	20.9564	20.5345	40.3946	39.6518	39.3064	32.4623	32.3564	33.2832	16.6467	15.9714	16.3632
TraesCS2B02G436300	1.954	2.46e-74	2.447	6.93e-121	2.842	3.32e-170	2.08826	1.86639	1.80069	7.81624	8.52204	8.41474	12.3063	11.8552	12.1882	20.2178	19.9244	19.7265
TraesCS7D02G352200	1.363	2.79e-74	0.525	3.74e-10	-0.632	1.41e-11	4.27502	4.18392	4.42483	12.4007	12.1235	12.2631	7.3525	7.23526	6.8812	4.01367	3.81448	4.2337
TraesCS6A02G234900	1.067	3.54e-74	1.085	9.56e-76	-0.689	7.55e-22	14.38	13.1436	13.6325	31.4964	31.8704	32.3293	34.0225	33.3992	33.6564	12.3071	12.2668	12.4684
TraesCS2D02G061400	2.511	4.49e-74	1.149	8.36e-14	-1.573	2.32e-12	1.32865	1.72468	1.64074	9.67512	9.65139	10.3824	4.02853	4.02892	3.99854	0.751653	0.888405	0.648891
TraesCS6A02G224800	-1.282	4.89e-74	-1.443	1.1e-85	-1.171	8.35e-66	18.1252	17.7557	18.3668	8.12541	7.99095	8.6492	7.73145	8.03904	7.33315	11.6278	11.5944	11.7269
TraesCS5A02G069600	0.729	5.5e-74	0.996	1.41e-141	0.803	3.75e-92	7.65184	7.90559	7.69078	14.163	14.1356	14.4814	17.9218	18.0769	17.7157	19.7779	19.149	19.9326
TraesCS7B02G018600	-0.514	6.42e-74	-0.521	5.39e-74	-2.204	0	38.7764	39.7416	39.3011	30.3307	30.9583	30.2803	31.2585	31.912	31.9113	12.3399	12.4438	12.3202
TraesCS7D02G057600	1.218	6.96e-74	0.689	8.36e-22	0.5	3.73e-12	7.39172	7.34169	7.16643	19.0276	18.3965	19.1306	13.5655	13.4846	13.8405	15.0542	15.2721	14.6155
TraesCS6A02G332000	0.782	7.56e-74	0.908	8.78e-100	0.238	2.61e-07	29.8818	28.3623	29.6047	54.9427	56.3876	56.3824	63.0396	64.2804	63.6018	50.5341	50.1348	49.7054
TraesCS4A02G397000	4.366	8.33e-74	0.495	0.1628	2.483	8.73e-23	0.291749	0.208424	0.375363	6.6927	6.69504	6.65446	0.491231	0.468949	0.468938	2.41788	2.16623	2.5176
TraesCS2A02G089400	2.013	8.96e-74	2.412	1.1e-108	0.983	2.05e-16	2.08132	1.96336	1.8934	8.52547	9.16355	8.91323	12.4682	12.3173	11.8102	5.65982	5.80332	5.5718
TraesCS2B02G151800	-0.544	9.18e-74	-0.396	6.05e-40	-1.303	0	40.7242	40.9358	40.7374	31.0251	31.7675	30.4141	36.1843	35.7948	35.7468	24.0776	24.2041	23.6957
TraesCS3D02G118200	-0.896	1.17e-73	-0.858	1.28e-66	-2.021	3.04e-268	10.1881	10.4712	10.1638	6.01174	6.29129	6.08077	6.87822	6.40968	6.40116	3.7044	3.86544	3.44785
TraesCS2D02G211100	6.675	1.18e-73	7.748	1.89e-99	7.781	5.54e-101	0.147164	0.105133	0.0841513	12.9394	12.6616	12.5597	27.662	28.5208	27.5739	34.7339	36.1349	36.5485
TraesCS3A02G066600	-2.195	1.26e-73	-2.132	1.74e-68	-1.804	5.18e-60	12.2362	11.8121	12.5546	3.19252	2.93369	2.74776	3.23621	3.31951	3.11197	5.19475	5.14846	4.86518
TraesCS7B02G078200	-1.032	1.31e-73	-0.927	1.34e-59	-2.497	1.1e-284	53.6794	58.749	59.1872	31.1888	30.5497	31.4135	34.5193	33.8448	36.1681	14.417	15.6746	14.0291
TraesCS5B02G552300	4.532	1.35e-73	0.062	0.9139	0.473	0.1618	0.391778	0.335861	0.364043	9.25562	9.31253	9.47268	0.389795	0.449808	0.479784	0.710251	0.642672	0.845195
TraesCS2D02G210000	-0.348	1.46e-73	-0.515	3.7e-151	-0.528	4.22e-164	165.26	164.486	162.974	142.773	144.491	142.359	132.628	131.986	134.577	164.91	164.131	166.973
TraesCS1D02G215100	0.616	1.53e-73	0.552	6.6e-58	-1.064	2.18e-153	40.0309	38.1571	38.5025	64.3843	67.0774	67.049	65.743	65.7743	66.668	26.224	27.2364	27.503
TraesCS5A02G161800	0.701	1.6e-73	0.502	5.66e-36	0.482	1.66e-34	13.4607	12.92	13.0329	23.652	23.7746	23.7216	21.4853	21.4591	21.6997	26.6824	26.941	26.2399
TraesCS7D02G488800	2.217	1.6e-73	-0.036	0.8832	2.714	2.53e-115	0.950244	0.936205	0.965087	4.88124	4.69252	5.1409	1.10934	1.09425	1.01824	8.87915	9.27432	8.99549
TraesCS2B02G268000	-0.76	1.82e-73	-0.555	1.5e-40	-3.258	0	38.2633	37.7517	38.6896	24.8232	25.2829	25.0776	29.5328	29.6869	31.1982	5.54257	6.02637	5.82444
TraesCS7D02G373100	-0.172	1.91e-73	-0.553	0	-4.993	0	583.124	584.977	586.302	576.305	575.845	576.803	461.098	461.578	462.045	26.2846	26.4097	27.2534
TraesCS2D02G031800	0.584	2.18e-73	0.21	1.83e-09	-0.319	1.69e-19	27.4094	28.9508	28.0049	46.092	47.3978	46.9329	38.3059	37.7435	36.9878	33.2043	32.5303	32.4171
TraesCS1A02G037900	-0.923	2.66e-73	-0.923	2.83e-71	-2.04	4.23e-246	24.0265	23.6592	23.1477	13.9124	13.7498	13.8113	14.0293	14.475	14.7553	8.17611	8.33519	8.48917
TraesCS2B02G204500	-0.603	2.89e-73	-0.623	5.4e-76	-1.287	8.13e-281	61.6606	59.6006	60.8746	43.3137	44.1459	45.6358	45.2797	46.2232	45.4396	36.6877	35.7498	35.8493
TraesCS3D02G142500	2.969	3.68e-73	1.618	1.32e-19	-1.333	4.74e-07	1.60226	1.38595	1.64669	13.6585	13.0403	13.579	5.33595	5.93973	5.19714	0.837401	1.15154	0.680112
TraesCS5D02G023800	-1.708	3.92e-73	0.064	0.5117	-3.908	2.86e-136	51.8017	53.66	51.8372	17.7362	18.2155	17.5042	60.6581	62.1179	67.6673	5.51541	5.2178	4.47014
TraesCS5B02G427000	1.615	4.07e-73	1.279	1.16e-43	-0.892	6.38e-14	3.38736	3.62646	4.01033	12.0062	12.6739	12.81	10.275	10.3527	10.3524	2.76774	2.91219	2.93953
TraesCS4B02G371700	-0.999	6.08e-73	-1.064	3.78e-79	-2.866	0	14.438	14.5855	14.3553	7.78817	8.24695	8.05619	7.48726	8.28068	8.26633	3.00141	2.69834	2.93636
TraesCS4D02G299000	-0.578	6.11e-73	-0.613	3.39e-79	-1.101	1.74e-232	36.2121	35.7957	35.5333	26.492	26.8114	26.6471	27.5294	26.2813	27.6219	23.982	24.1034	24.6518
TraesCS4A02G114400	3.795	6.79e-73	3.925	4.67e-78	4.448	9.47e-103	0.542805	0.434311	0.488859	7.41538	7.52209	7.65153	8.3169	8.31772	9.16091	15.7776	15.6479	15.017
TraesCS4A02G156300	-0.403	7.9e-73	-0.48	2.25e-98	-1.152	0	62.459	61.8211	61.9576	52.3811	51.9773	51.9477	51.3993	51.2101	52.083	40.451	40.5959	40.5754
TraesCS5A02G203400	-1.761	7.93e-73	-0.941	6.18e-27	-1.783	4.49e-76	10.0497	10.9815	10.1342	3.46744	3.24566	3.4931	6.06222	6.33965	6.39487	4.15278	4.52791	4.4632
TraesCS3B02G149400	1.02	8.1e-73	0.916	4.42e-57	-3.206	1.42e-160	9.65188	9.94589	9.47034	22.1313	21.2174	22.097	21.2431	20.9765	21.2895	1.54021	1.74238	1.2872
TraesCS4D02G170300	1.878	8.25e-73	2.971	3.34e-196	-4.512	7.13e-33	1.69783	1.93347	1.48031	7.10702	6.62586	7.12497	15.292	15.4015	15.7254	0.121901	0.121913	0.0812343
TraesCSU02G269600	-2.223	8.59e-73	-0.19	0.06799	-4.146	3.26e-95	33.7496	34.2033	32.8751	8.38439	8.60238	6.98879	33.2785	33.522	35.5638	2.57476	2.71054	2.98009
TraesCS5D02G230300	0.901	9.41e-73	-0.296	7.97e-07	-3.134	7.87e-217	5.80876	5.98514	5.89591	12.3504	12.2927	12.0171	5.56097	5.54173	5.58118	0.982193	0.982291	0.959481
TraesCS5B02G558300	1.99	9.49e-73	1.672	3.27e-49	0.841	3.3e-12	2.36506	2.39261	2.39388	10.2942	10.6107	10.6358	8.41787	8.70999	9.26326	5.88108	6.2431	6.46984
TraesCS2A02G266900	-2.66	1.01e-72	-2.367	5.37e-63	-1.688	2.96e-45	11.9364	12.9137	12.1769	2.13725	2.00437	2.36049	2.48823	3.08571	2.73726	5.5572	5.44547	5.66717
TraesCS4B02G179400	0.398	1.06e-72	-0.37	1.75e-53	-1.744	0	87.4607	87.0713	88.6287	128.26	127.359	129.24	77.4676	78.8776	79.4798	37.3519	38.5237	38.1151
TraesCS6B02G265600	-1.1	1.59e-72	-0.694	5.89e-32	-2.604	5.44e-229	19.9509	19.3335	19.7659	10.3959	10.1378	10.0417	13.7992	14.4388	14.0396	4.73854	4.91897	4.43683
TraesCS7A02G319000	0.988	1.65e-72	0.843	4.76e-51	0.513	3.1e-19	16.5192	16.0947	15.8075	36.0182	34.8969	35.681	32.2328	33.6084	34.7338	33.1427	34.5751	32.5342
TraesCS3A02G289900	1.046	1.65e-72	-0.358	2.94e-07	-2.91	1.42e-167	5.057	4.62713	4.7121	10.9433	11.0437	11.0164	4.42703	4.06423	4.51571	0.874707	0.908014	0.996097
TraesCS1D02G175000	0.248	1.76e-72	0.154	1.11e-27	-2.9	0	255.615	253.405	254.162	336.518	334.418	334.88	328.727	326.67	328.131	48.1677	50.2174	49.9333
TraesCS5A02G268300	3.863	1.88e-72	1.816	3.27e-14	4.478	9.84e-100	0.431164	0.456597	0.43146	7.24578	7.17534	6.88283	1.6577	1.73939	1.98395	14.2231	14.0405	14.4011
TraesCS7D02G324600	1.378	2.01e-72	1.011	7.39e-37	-0.012	0.9219	9.46755	9.71602	9.02093	28.2946	27.1992	25.8941	22.185	22.496	21.1281	13.2832	13.4835	13.8248
TraesCS3A02G050800	2.427	3.02e-72	1.76	1.34e-35	0.102	0.5929	1.13269	1.0007	1.00123	6.02669	6.35468	6.33599	4.10618	3.86383	4.329	1.66557	1.66574	1.55087
TraesCS2A02G130200	-0.871	3.41e-72	0.218	1.34e-06	-1.773	1.04e-219	25.4984	26.256	25.8808	15.8461	15.6418	15.6404	34.6916	35.0596	34.8244	11.0754	10.959	10.9241
TraesCS6A02G098300	1.969	3.75e-72	1.358	7.51e-32	-0.291	0.04624	3.0304	3.09748	2.89918	13.0255	12.7745	13.444	9.1344	8.63571	9.02803	3.62228	3.58239	3.50012
TraesCS2B02G390700	-1.111	3.88e-72	-1.033	3.89e-62	-4.423	2.38e-251	13.3236	12.8998	13.4905	7.05921	6.53243	6.81911	7.61944	7.46812	7.38346	0.933774	0.89575	0.8572
TraesCS1A02G383200	-1.092	3.99e-72	-1.125	9.61e-74	-2.184	1.89e-202	33.0815	32.5742	31.1633	16.6993	17.2316	16.4931	16.6643	17.215	17.5283	9.64173	10.1735	11.0968
TraesCS2A02G206100	-0.395	4.12e-72	-0.652	9.83e-180	-0.649	1.27e-185	125	124.247	126.22	104.705	105.737	106.56	91.7888	91.5392	93.3212	117.36	115.271	114.834
TraesCS7D02G366600	0.67	4.34e-72	-0.24	2.86e-08	-1.385	1.28e-183	7.84244	8.13631	8.10159	14.0144	14.406	14.1178	7.93614	7.77664	7.90189	4.51125	4.49598	4.37587
TraesCS6D02G212200	0.874	4.37e-72	-0.39	4.71e-11	1.98	0	3.87653	3.71833	3.8196	7.69274	7.74618	7.78353	3.47315	3.30336	3.31037	22.1466	21.5171	21.6661
TraesCS2A02G169300	0.703	4.79e-72	0.597	3.08e-50	-0.023	0.653	23.0051	22.342	22.8139	41.4653	40.5982	41.1234	40.3846	39.3788	39.6242	32.6369	32.7513	31.9851
TraesCS7B02G066000	0.553	4.86e-72	-0.297	1.54e-17	-0.513	2.68e-50	57.083	57.5694	56.7717	93.5475	93.9771	91.6483	53.7948	54.1753	53.5941	57.9088	58.0685	58.3853
TraesCS5A02G473100	2.75	5.04e-72	0.245	0.2803	-2.942	3.74e-16	0.619235	0.564278	0.578349	4.36663	4.32856	4.46012	0.781449	0.825763	0.810998	0.116419	0.133063	0.0831224
TraesCS5D02G219700	-0.983	6.35e-72	-1.317	1.59e-112	-2.736	1e-288	27.8222	28.3688	28.0126	15.6206	15.9271	15.7341	13.0862	12.4759	13.5764	6.13888	6.20847	5.99849
TraesCS1B02G147700	0.803	6.58e-72	-0.119	0.03469	-0.302	2.62e-09	9.68533	10.1101	9.81654	19.2387	19.0066	19.1004	10.1375	10.592	10.8452	11.5853	11.436	11.8212
TraesCS5B02G481100	0.612	6.79e-72	-0.158	7.41e-05	-1.939	0	52.4127	50.3158	51.3276	86.9563	87.6703	86.7182	52.8126	53.1452	53.9442	19.2417	19.3257	19.726
TraesCS5B02G210800	-0.434	7.63e-72	-0.633	8.62e-142	-3.736	0	162.617	162.755	161.179	133.203	133.539	133.164	121.284	121.619	120.443	17.5684	17.6614	17.7437
TraesCS2D02G519500	-0.611	7.89e-72	-0.55	9.87e-58	-1.968	0	45.7943	47.0954	46.3351	33.3689	34.1332	33.703	36.4313	36.6621	37.0704	17.0475	17.0236	17.5531
TraesCS3A02G184900	2.171	7.95e-72	3.209	2.02e-167	0.536	0.0001669	1.0356	1.01958	1.19824	5.2433	5.41583	5.60154	11.3043	11.7562	11.7906	2.2099	2.42527	2.20901
TraesCS6B02G310900	-1.366	8.08e-72	-0.976	1.08e-40	-0.758	5.16e-28	6.18263	6.49098	6.51809	2.7086	2.75489	2.79998	3.88859	3.73696	3.67353	5.31491	5.42975	5.72692
TraesCS7A02G269900	1.518	8.16e-72	-0.41	0.0002581	-1.903	1.61e-45	3.11424	3.27399	3.31114	10.3986	10.1137	10.3164	2.80597	2.80624	2.8441	1.1762	1.2191	1.36812
TraesCS5B02G488900	0.915	8.16e-72	0.342	1.15e-09	-3.912	5.65e-205	18.1906	17.4378	17.5634	36.6053	37.8722	36.8934	25.5934	25.9695	26.5294	1.82624	1.68593	1.61487
TraesCS2A02G404000	-2.329	9.08e-72	-2.697	1.88e-78	-3.072	4.72e-92	2.83317	2.86982	2.66301	0.607438	0.677096	0.564194	0.523726	0.494679	0.475268	0.470412	0.470459	0.503027
TraesCS5B02G087800	-0.536	1.02e-71	-0.728	1.41e-122	-1.472	0	151.383	154.893	153.204	117.162	117.511	117.192	106.814	104.871	109.523	80.7544	78.9476	80.6569
TraesCS4A02G340600	-0.532	1.08e-71	-0.662	6.4e-105	-2.554	0	60.5275	60.0786	60.9078	45.5583	46.5484	47.2698	45.0284	43.923	43.8793	14.8762	15.1906	14.7739
TraesCS3B02G460000	-0.676	1.32e-71	-0.449	3.86e-33	-0.53	3.57e-47	85.8844	83.9296	84.9095	59.9835	58.5893	58.3952	71.6788	72.74	71.6314	87.4508	84.5462	83.9686
TraesCS2D02G314900	-0.425	1.48e-71	-0.535	1.13e-107	-1.413	0	43.7943	43.603	43.9135	35.8541	36.18	36.5374	35.013	35.3665	34.5489	24.1438	23.8949	23.524
TraesCS2A02G121000	-1.024	1.67e-71	-1.168	6.73e-86	0.085	0.1178	11.5258	11.6081	11.211	6.46488	5.96471	6.32485	6.01645	5.8443	5.84416	17.1121	17.812	17.9491
TraesCS7A02G337000	-0.788	1.69e-71	-1.065	3.87e-117	-4.948	0	21.4068	21.9644	21.6913	14.0023	13.7486	14.0777	11.9098	11.911	12.1836	0.959569	1.06831	1.03157
TraesCS4B02G045300	0.822	1.83e-71	1.154	5.15e-145	-1.218	1.05e-94	23.2539	22.6571	23.5228	45.7978	44.8745	45.6278	58.329	59.5197	61.1096	15.0451	13.8627	14.3901
TraesCS6A02G166000	-0.419	1.96e-71	-0.431	7.22e-74	-3.058	0	47.6778	48.2847	47.6588	39.6835	39.5686	40.0208	41.3624	40.6465	41.3433	8.33182	8.4201	8.26601
TraesCS6D02G148700	-0.568	2.06e-71	-0.447	9.33e-45	-0.597	4.72e-80	42.1658	42.6039	41.8528	31.2184	31.6259	31.9851	35.9703	36.0701	35.5491	39.8564	40.9253	40.6657
TraesCS3B02G087400	-0.33	2.35e-71	-0.297	4.52e-57	-1.38	0	205.139	205.196	204.155	179.197	180.989	182.452	193.334	193.465	192.536	113.034	116.837	112.61
TraesCS1D02G301100	-0.445	2.43e-71	-0.341	2.93e-42	-1.79	0	60.8606	61.1959	61.2284	49.6432	50.3749	49.4179	55.3176	55.8884	56.3527	25.7314	25.8653	25.3273
TraesCS5D02G331100	-0.354	2.5e-71	-0.738	4.74e-276	-1.747	0	150.256	151.907	150.047	130.18	130.759	131.816	106.256	104.14	103.541	65.1127	64.7959	65.5441
TraesCS5A02G492900	1.117	2.81e-71	-0.032	0.7503	-3.379	3.45e-140	7.72117	7.45802	8.04761	19.0574	18.6114	18.2477	8.90009	8.96165	8.45572	1.09517	1.25501	0.889467
TraesCS3D02G155800	-0.777	3.24e-71	-0.448	1.15e-25	-0.455	8.87e-28	36.8023	36.3867	37.7232	23.294	23.7061	24.8399	32.0708	30.6635	31.3962	38.4659	39.3925	39.5316
TraesCS2D02G352900	-0.242	3.32e-71	0.004	0.8275	0.027	0.05431	355.78	354.589	355.97	332.852	332.995	335.171	415.208	411.216	412.222	521.386	525.267	530.333
TraesCS1B02G150400	-0.531	5.5e-71	-0.681	2.13e-109	-1.455	0	43.365	42.936	43.0189	33.178	32.9303	33.2586	30.6759	31.9827	30.7426	22.6563	22.7856	23.0282
TraesCS2A02G293400	-0.555	6.04e-71	-0.762	8.29e-123	-1.538	0	27.2148	27.2295	27.1598	20.568	20.7264	20.3616	18.6741	18.8224	18.2362	13.5683	13.8873	13.3215
TraesCS3A02G104600	2.263	6.42e-71	1.618	6.91e-34	-0.712	5.69e-05	1.45719	1.50028	1.22231	7.31362	7.46003	7.50045	5.23509	4.91412	4.70734	1.26907	1.24329	1.19089
TraesCS3D02G162500	-0.921	7.1e-71	-1.401	4.76e-140	-4.936	0	30.0073	31.5379	32.306	17.9942	18.5579	18.4633	13.3383	13.9365	13.8843	1.37574	1.55152	1.52147
TraesCS1B02G110400	1.007	7.99e-71	0.143	0.04224	-1.057	1.36e-49	7.02764	7.13079	6.98868	15.3615	15.6606	16.1624	8.92032	9.04618	9.07722	5.16311	4.52918	5.05533
TraesCS6B02G373800	1.872	8.21e-71	1.692	3.7e-56	-0.073	0.6242	3.83467	3.87563	4.24122	16.5237	16.1037	15.9474	14.9645	14.4037	15.3549	5.36634	5.41567	5.70552
TraesCS7B02G237200	1.162	8.62e-71	0.968	2.85e-47	-0.112	0.1662	10.7433	11.2644	10.4259	25.8264	27.205	27.5449	24.9699	24.6941	23.7893	13.9258	15.1042	14.5084
TraesCS6D02G008500	-1.285	8.74e-71	-0.546	1.39e-16	1.771	1.17e-265	19.8807	19.4222	19.7019	8.58957	8.59257	9.69802	15.1213	15.9881	15.6993	99.0853	96.5852	96.5829
TraesCS3D02G413800	-0.596	8.83e-71	-0.408	2.73e-34	-1.615	0	74.1249	73.4877	72.6182	53.5609	54.0772	54.0722	65.1088	63.1346	63.967	36.0151	34.4118	33.9243
TraesCS6D02G290800	1.428	9.38e-71	0.069	0.5689	-3.15	1.68e-73	3.90833	3.64119	3.66099	11.4116	11.1075	10.9696	4.57011	4.53231	4.51308	0.625498	0.668703	0.539004
TraesCS3D02G495400	5.966	9.62e-71	6.502	3.34e-84	-5.444	2.1e-05	0.233108	0.0999186	0.333239	15.9626	16.2237	14.0507	23.9778	22.303	23.6584	0	0	0
TraesCS5A02G338800	0.701	1.46e-70	0.339	1.02e-15	1.059	9.46e-172	13.9879	13.961	14.0265	25.4845	25.4795	24.7675	20.6158	20.1669	20.7107	42.5274	42.8824	41.4934
TraesCS4D02G093300	-0.798	1.84e-70	-0.431	1.51e-22	-0.833	1.28e-77	37.8044	39.3807	38.6012	25.4209	24.0091	24.4899	33.9035	33.0814	32.5092	31.2599	31.5495	31.5336
TraesCS1A02G335800	1.415	1.89e-70	1.275	1.51e-55	-4.396	2.46e-64	5.39212	5.23035	5.53139	16.2353	15.9032	15.6679	15.2422	15.2147	14.8078	0.327482	0.393018	0.392819
TraesCS1D02G330600	1.693	2.26e-70	1.757	1.91e-75	-0.098	0.4506	3.95779	3.89655	3.77485	13.9617	13.6701	14.1136	15.3393	15.7384	14.4459	5.15707	5.30708	5.3044
TraesCS5B02G401700	1.384	2.36e-70	0.541	5.54e-10	-1.161	1.86e-28	4.99516	5.28848	4.84097	14.2153	14.9324	14.6721	8.92032	8.27018	8.2941	3.29051	3.45402	3.07171
TraesCS4A02G376000	1.064	2.85e-70	0.681	3.12e-27	-0.937	4.27e-36	12.6154	12.3551	12.3325	28.7969	29.6452	28.1617	23.4753	23.0093	22.7903	8.48615	9.64911	10.137
TraesCS4B02G299700	1.014	3.25e-70	1.533	2.38e-171	3.833	0	11.5286	11.2668	11.5365	25.7044	25.7133	25.553	38.2224	38.1908	38.6841	238.141	237.17	234.464
TraesCS7D02G183500	1.941	3.43e-70	2.224	1.22e-93	-1.905	5.75e-24	3.14548	2.97499	2.94236	12.8487	12.9516	12.8193	16.5585	16.5601	15.9002	1.15701	1.15713	1.19785
TraesCS3A02G219100	1.345	4.53e-70	1.312	1.36e-65	1.201	6.14e-56	6.5705	6.01728	6.41657	17.8346	17.1576	18.5983	18.6888	17.4182	18.5206	21.7184	19.9025	21.7733
TraesCS4D02G353800	-0.601	4.87e-70	-0.917	6.13e-145	-1.277	2.48e-263	41.7369	42.512	42.4577	30.6172	31.1624	30.9752	26.4778	25.8833	25.3267	25.4073	25.5027	24.9559
TraesCS1B02G279100	1.634	5.36e-70	2.925	4.39e-248	-4.476	4.06e-42	3.48796	3.10654	3.31201	11.5936	10.9384	11.5966	28.916	28.9188	29.3274	0.307703	0.18464	0.153789
TraesCS2B02G315300	-0.49	6.58e-70	-0.683	1.4e-125	-1.236	0	54.4481	54.6424	54.8576	43.0747	42.6358	43.8639	39.6116	39.6517	38.9806	33.5873	33.1616	34.2272
TraesCS6A02G372600	3.058	7.4e-70	2.415	1.3e-41	-0.949	0.0003812	1.53621	1.43732	1.48767	13.9198	13.4969	13.8283	9.50438	8.97429	9.08029	1.07806	1.13807	1.13749
TraesCS5A02G260600	0.361	8.46e-70	0.433	1.5e-99	0.665	2e-250	56.8411	56.6104	56.9556	80.4046	82.4378	80.1113	88.7443	89.1849	88.454	131.611	130.331	130.265
TraesCS3A02G531300	1.045	8.97e-70	1.804	1.96e-222	0.297	4.34e-06	21.3838	21.6274	20.1001	49.6614	49.1257	45.8035	87.0149	82.801	85.3737	39.1441	36.6504	36.69
TraesCS5D02G426500	-0.6	9.2e-70	-0.895	7.55e-140	-5.59	0	101.86	103.194	103.845	76.7754	74.6405	74.7968	63.3422	64.1232	64.942	2.9299	3.64989	2.72319
TraesCS5A02G163600	-0.721	9.45e-70	-0.617	2.33e-51	0.325	2.51e-19	19.3281	19.5927	19.2036	12.9337	13.0439	13.1615	14.4702	14.3683	15.0466	35.3227	35.4094	34.8926
TraesCS5A02G479300	0.247	1.03e-69	0.046	0.003625	0.276	6.7e-89	141.451	140.954	142.902	186.628	187.324	186.288	169.34	168.178	171.006	248.196	247.869	251.335
TraesCS6A02G219500	-1.018	1.08e-69	-0.789	7.99e-44	-0.782	1.43e-45	24.2838	23.9736	23.2725	12.885	12.9442	13.3808	16.3577	16.1147	15.4722	19.8996	19.8326	20.6155
TraesCS3B02G384900	-2.714	1.23e-69	-1.144	1.88e-22	-6.004	3.18e-51	9.30637	9.49469	9.16314	1.43323	1.72048	1.57696	4.8456	5.12643	4.68577	0.271028	0.225879	0.135459
TraesCS2A02G387800	0.518	1.59e-69	0.681	2.74e-121	-0.643	9.44e-85	71.4373	71.2099	71.0774	114.056	113.639	111.963	135.428	131.318	130.184	65.392	67.1271	66.0237
TraesCS1D02G092200	1.001	1.74e-69	0.146	0.03872	-1.644	1.98e-94	6.91803	6.90477	6.86544	15.0495	15.8926	15.0259	8.8244	8.97875	8.70227	3.25443	3.13356	3.2185
TraesCS2D02G268600	-0.99	1.85e-69	-0.973	1.12e-65	-3.73	0	53.4983	53.7232	55.4857	30.0564	29.5476	31.3103	30.8657	32.7255	32.3766	6.60977	5.82503	5.36417
TraesCS2B02G551800	-2.834	2.02e-69	-2.493	7.39e-60	-3.597	1.62e-79	13.1847	12.5565	11.8841	1.85882	1.76649	2.23116	2.80464	2.33743	2.59708	1.5232	1.52335	1.46402
TraesCS4B02G322700	1.107	2.04e-69	1.404	1.29e-114	1.719	2.39e-182	5.07846	5.33805	4.98483	12.1406	12.393	12.2988	15.1459	16.1873	15.8749	24.473	24.7687	24.3263
TraesCS7D02G162300	0.639	2.2e-69	-0.365	7.25e-19	-0.729	9.49e-70	38.9847	39.5511	39.1449	68.2503	67.2762	67.9608	36.7963	35.3416	33.711	34.8296	34.9299	33.3004
TraesCS6B02G296400	-0.74	2.23e-69	-0.189	5.83e-06	0.615	5.07e-67	42.1553	42.1292	42.4774	28.2427	27.597	28.4373	43.3895	42.452	42.9044	92.6521	95.1008	93.8729
TraesCS7B02G019600	-0.763	2.23e-69	-0.419	2.28e-23	4.927	0	23.5621	22.5109	23.3537	14.973	14.9352	15.5148	19.9084	19.8142	20.4149	1026.34	1016.76	1021.15
TraesCS1A02G264500	1.201	2.34e-69	1.285	3.43e-79	-0.282	0.0006646	6.09166	6.34081	6.59253	16.0275	16.3144	16.2047	18.2032	17.2863	18.2046	7.77138	7.58126	7.35938
TraesCS6B02G050700	1.62	3.21e-69	0.966	1.09e-22	0.237	0.03186	2.53772	2.46904	2.55673	8.58951	8.85741	8.35996	5.4752	6.1232	5.5126	4.1103	4.44458	4.37976
TraesCS6A02G271200	-0.82	3.38e-69	-0.987	9.64e-93	-2.716	0	25.3231	24.8308	25.122	15.9816	15.892	15.4719	14.7148	14.695	14.567	5.51665	5.78107	5.32261
TraesCS3B02G359400	-2.403	3.44e-69	-2.304	1.14e-63	-3.329	3.3e-88	6.21193	5.99938	5.83168	1.28929	1.35115	1.14633	1.37236	1.41824	1.44108	0.902991	0.774069	0.928414
TraesCS4D02G006600	0.857	3.93e-69	0.066	0.3091	-5.382	1.01e-191	30.1558	29.7672	31.5534	60.345	62.8923	60.6999	37.2399	37.8334	35.8103	1.14043	1.18806	0.854974
TraesCS2D02G253300	1.353	4.09e-69	0.206	0.03455	-0.569	2.34e-09	1.48414	1.31875	1.38696	3.9392	3.95234	3.99315	1.83335	1.82038	1.9452	1.43053	1.37878	1.28918
TraesCS4A02G097900	-0.605	5.33e-69	-0.146	3.2e-05	-0.097	0.004534	24.2497	23.9385	23.9862	17.8915	17.5398	17.2362	24.6457	25.5855	25.285	32.5364	33.2728	32.1286
TraesCS6A02G311500	1.549	5.38e-69	-0.261	0.0287	-3.559	3.13e-61	2.31791	2.31826	2.49792	7.67887	7.86571	7.62824	2.39541	2.14579	2.35149	0.281799	0.314984	0.281685
TraesCS4D02G292400	1.091	5.41e-69	0.433	3.19e-10	-0.958	5.62e-34	10.8858	10.507	10.9811	25.2764	25.0046	26.2931	16.7432	16.9017	16.964	8.31123	7.7815	8.09575
TraesCS4B02G003600	0.529	5.46e-69	0.384	4.5e-35	-0.785	8.86e-113	61.2491	61.7511	61.784	98.3258	98.4231	99.2329	93.0387	94.4203	91.7436	52.7108	52.2794	50.666
TraesCS5A02G122300	0.863	6.33e-69	0.655	5.06e-38	0.511	6.33e-24	12.8968	12.6891	12.2761	26.2156	25.3198	24.8952	22.8962	23.0108	23.1451	26.5614	25.981	25.7652
TraesCS5D02G406400	1.343	1.2e-68	0.473	5.2e-08	-1.413	6.42e-39	5.68676	5.78698	5.49186	16.165	15.6467	15.9548	8.67419	9.3137	9.28687	3.09135	2.94158	3.2101
TraesCS3D02G266100	-0.394	1.27e-68	-0.608	1.8e-151	-2.478	0	110.093	109.816	108.508	93.5599	92.3434	91.5894	83.9466	82.7841	82.8723	28.5415	28.3666	28.6061
TraesCS2D02G358200	2.822	1.45e-68	0.644	0.001547	-2.874	1.27e-14	0.728521	0.766982	0.72902	6.04685	5.64448	5.77265	1.45847	1.33535	1.23261	0.115854	0.139038	0.185291
TraesCS3D02G127300	-1.699	1.57e-68	-2.052	3.23e-84	-7.106	1.25e-57	6.45939	6.23554	6.22386	2.16953	2.17029	2.12698	1.87881	1.71839	1.68623	0.0905661	0.0362301	0.0724235
TraesCS2A02G254100	-0.698	1.69e-68	-0.497	5e-36	-3.136	0	37.5118	37.0647	36.6087	25.6964	25.4014	25.0084	30.4176	30.2993	30.5412	5.96463	6.23886	6.15366
TraesCS5A02G175200	1.078	1.83e-68	-0.214	0.005075	-4.542	2.22e-149	12.9068	12.6469	13.5444	31.4734	29.2499	30.9292	12.9878	12.4841	13.5778	0.632824	0.886041	0.917222
TraesCS7B02G242200	0.674	2.3e-68	0	1	-2.252	0	58.3022	57.7037	59.6083	103.393	104.448	103.177	66.699	68.0071	68.7105	17.4325	18.9023	17.1808
TraesCS2B02G515500	0.85	2.33e-68	0.325	1.18e-09	-0.932	2.17e-55	19.2208	17.9384	18.535	36.4515	37.6699	37.3182	27.4794	26.5839	26.733	13.9786	14.1151	14.2767
TraesCS3B02G586700	2.515	2.43e-68	-0.964	1.28e-05	-4.1	1.08e-18	3.96967	3.52913	4.04595	24.6663	24.6749	23.8972	2.20546	2.28445	2.36317	0.355387	0.177711	0.444054
TraesCSU02G050500	-3.013	2.63e-68	-0.787	2.31e-11	-10.538	2.21e-18	11.8165	11.6137	11.5175	1.71641	1.56984	1.52064	8.00225	7.34525	8.11248	0	0	0
TraesCS3B02G216200	-0.842	2.84e-68	-0.59	2.85e-35	-0.518	2.44e-29	24.4449	26.2329	25.7368	16.268	15.8256	15.2132	19.4335	19.6175	19.7308	26.0531	25.953	25.4011
TraesCS3D02G357700	2.54	3.43e-68	1.755	2.67e-30	-0.721	0.0005394	4.19541	4.28347	3.76097	26.9814	26.3202	25.7311	16.389	15.5477	15.922	4.01419	3.8033	2.95663
TraesCS2D02G295700	3.758	3.47e-68	0.032	0.9571	0.71	0.007589	0.473027	0.662339	0.662691	9.09989	9.31477	8.58815	0.574414	0.811017	0.743415	1.41019	1.48656	1.37152
TraesCS1B02G087000	-2.152	4.92e-68	-0.567	2.09e-06	-3.744	4.03e-139	82.9724	70.2009	85.7221	20.6385	17.3123	21.719	68.7195	56.2305	61.8762	7.58877	8.53822	9.75303
TraesCS6A02G215300	-1.316	5.13e-68	-1.176	3.25e-55	-1.798	7.3e-109	33.728	34.0382	32.5915	14.9686	15.2663	14.5046	16.9257	17.5156	16.9923	13.637	14.0807	14.1473
TraesCS3A02G484800	0.645	5.3e-68	-0.047	0.3426	-1.018	1.19e-115	5.48382	5.40241	5.46159	9.56013	9.42234	9.39242	6.1633	6.14999	6.01071	4.00697	3.72487	3.98443
TraesCS3D02G207600	0.624	5.51e-68	0.881	1.79e-138	-0.157	9.05e-05	20.5248	21.1651	21.3487	36.1511	36.4774	35.2357	44.9244	44.7259	44.7986	27.4283	27.2853	27.3132
TraesCS5A02G169000	0.618	5.67e-68	0.002	0.9901	0.225	1.62e-09	6.3803	6.55563	6.30493	11.0062	10.862	10.9183	7.58347	7.41876	7.31184	10.7752	10.8305	11.0296
TraesCS5B02G131000	-0.581	5.84e-68	-1.287	7.7e-266	-1.205	3.49e-251	38.0736	37.9578	37.9932	28.8798	27.3011	28.4355	18.3048	18.1925	17.6221	23.6416	24.1583	23.9625
TraesCS5A02G389000	0.831	6.59e-68	0.802	8.25e-62	4.052	0	3.78553	3.85864	3.93327	7.64063	7.59462	7.62174	7.63821	7.94203	7.80197	92.2837	93.3272	93.1049
TraesCS3B02G483500	0.359	7.4e-68	0.082	0.0003448	-1.365	0	66.5057	65.5095	66.5788	94.7316	93.8262	94.0952	82.0108	80.6747	80.8353	37.1324	36.9195	37.85
TraesCS3D02G233400	1.193	7.97e-68	1.111	2.44e-57	0.641	5.56e-19	8.62619	9.16255	8.89976	22.5976	22.2208	22.9241	22.3545	22.5359	21.8904	20.0834	19.9641	20.358
TraesCS2D02G493700	-1.62	8.16e-68	-0.134	0.1221	0.417	2.08e-09	8.51502	8.39771	8.78194	3.25164	3.0708	2.9568	9.2507	8.84494	9.02265	16.8845	16.4561	16.4478
TraesCS3D02G409800	1.057	9.07e-68	0.303	1.75e-05	1.584	1.4e-164	8.38694	8.51158	8.78764	20.0774	19.5403	19.7041	12.1845	12.1857	12.3176	36.998	37.8663	36.8638
TraesCS2B02G540100	0.59	1.05e-67	0.888	1.06e-157	1.019	1.4e-217	24.7864	24.5917	24.1174	40.3129	41.6764	40.8249	51.473	52.5799	53.4099	72.6026	71.9775	71.5707
TraesCS4D02G348600	-0.402	1.13e-67	-0.223	8.1e-22	-0.959	0	149.231	148.659	152.754	128.47	125.094	125.111	148.683	148.06	150.255	112.118	111.518	112.683
TraesCS2B02G369400	-1.04	1.19e-67	-1.226	1.07e-85	-1.828	7.35e-162	8.10907	8.37488	8.18589	4.43812	4.50797	4.37096	4.03363	4.07764	4.09935	3.44312	3.45576	3.18359
TraesCS3B02G428100	-1.234	1.68e-67	-0.86	5.81e-36	-3.208	3.14e-200	34.4532	34.4036	34.1474	15.6733	15.9945	16.94	21.1619	22.5749	21.9865	5.70229	5.43761	5.03719
TraesCS7A02G516100	2.034	1.78e-67	2.023	3.91e-66	-0.619	5.37e-05	2.97386	2.69548	3.0069	13.6313	14.052	11.7634	14.007	13.776	13.0454	2.69565	2.80825	2.69456
TraesCS6D02G216000	-0.689	2.15e-67	-0.846	1.68e-95	-3.535	0	40.8173	42.16	42.1615	29.5033	28.5725	28.0894	27.4488	27.0041	26.1757	5.65233	5.04722	4.969
TraesCS5A02G156200	0.601	2.28e-67	0.415	7.96e-31	0.907	8.24e-162	32.6688	32.018	31.7069	55.0721	54.44	52.8181	50.2097	48.4329	50.1633	86.6087	87.8628	87.7619
TraesCS2D02G572300	0.561	2.29e-67	-0.217	3.34e-09	-2.304	0	135.654	134.756	138.888	221.275	221.792	227.204	136.081	135.356	136.419	41.6354	39.3263	39.3064
TraesCS2B02G297800	-0.514	2.38e-67	-0.564	4.85e-78	-1.73	0	53.1812	52.5192	53.6833	41.4724	41.5583	40.8583	41.904	41.7286	41.2091	23.8021	22.882	23.0503
TraesCS5A02G264300	3.196	2.42e-67	2.892	5.53e-54	0.945	1.1e-05	1.28434	1.00928	1.23932	11.7411	11.7452	12.4479	10.1736	9.78136	10.4201	3.38168	3.32658	3.15865
TraesCS4B02G291900	1.016	2.62e-67	0.105	0.1696	-8.35	3.31e-37	11.4745	11.127	11.2827	25.6836	24.6879	25.7142	13.9785	14.3006	13.9261	0.090444	0.030151	0.0301358
TraesCS1A02G149300	0.878	2.63e-67	-0.301	5.86e-07	-2.72	1.93e-209	6.23924	6.1269	6.59299	12.9764	12.6279	13.0793	5.88619	5.99803	5.93721	1.38037	1.46038	1.3342
TraesCS3A02G107600	-0.642	2.92e-67	-0.699	3.52e-76	-1.105	1.34e-176	27.6237	27.5516	28.2077	19.6935	19.6858	19.9181	19.8847	20.1483	19.461	18.5559	18.6131	19.0647
TraesCS3D02G354300	-0.663	3.02e-67	-0.211	4.08e-08	-2.254	0	73.1342	72.5842	75.3898	52.2098	51.3057	51.5315	75.6134	73.216	72.4414	22.5696	22.5719	22.1248
TraesCS2A02G500400	-0.131	3.04e-67	-0.381	0	-2.098	0	1304.45	1300.68	1309.57	1326.61	1314.94	1326.7	1160.67	1160.31	1160.34	437.928	442.862	445.74
TraesCS3D02G276400	0.998	4.22e-67	0.981	1.09e-63	-0.512	6.98e-14	10.6917	10.3745	11.018	23.0858	24.599	23.468	24.6195	24.6482	24.0696	10.7287	10.9966	10.9318
TraesCS5D02G424400	0.661	4.88e-67	-0.281	2.18e-10	-1.894	3.24e-261	22.0261	21.8159	21.8664	38.4925	38.4316	38.4094	20.7101	20.9201	21.0028	8.63118	8.42093	8.60424
TraesCS6B02G136500	1.904	4.94e-67	0.48	0.0002895	-3.206	1.26e-37	1.91212	1.8556	2.1976	7.98583	8.33359	8.4599	3.2456	2.98218	3.40813	0.297452	0.411898	0.228717
TraesCS7B02G246800	1.103	5e-67	1.249	2.69e-86	-0.867	4.11e-27	5.45582	5.91996	5.90594	13.6681	13.8539	13.6881	16.1034	16.0683	15.3877	4.54107	4.66595	4.53923
TraesCS5B02G315700	-2.177	6.13e-67	-1.268	9.41e-32	-1.268	7.62e-34	6.1128	6.2278	6.36806	1.57439	1.48745	1.53105	2.85939	3.10409	3.03069	3.88692	3.77703	3.60979
TraesCS6D02G238500	-1.278	7.74e-67	-1.624	2.66e-93	-7.16	1.27e-84	7.67716	8.07916	8.10852	3.64996	3.50711	3.771	2.99245	2.95248	3.01951	0.0908182	0.0756893	0.0756511
TraesCS7A02G246300	0.876	7.77e-67	-0.359	2.06e-09	-6.555	1.15e-114	11.9954	11.6136	11.8989	23.7517	23.7934	24.7944	10.6857	10.8736	10.4997	0.316081	0.126445	0.105317
TraesCS2D02G453700	-1.033	8.03e-67	-0.604	1.51e-25	-1.992	2.04e-179	29.601	29.8986	28.6314	16.226	16.0209	15.5627	22.0996	22.3373	22.7294	11.1135	10.1404	10.8877
TraesCS1A02G214600	1.097	8.13e-67	0.339	2.47e-06	-0.106	0.1734	23.0725	21.4485	22.6812	55.5487	52.1125	51.9406	31.945	34.2524	32.2588	30.7652	29.293	30.5421
TraesCS4A02G106300	-0.943	8.36e-67	-0.47	3.77e-19	1.358	3.48e-223	20.2571	21.7433	21.0506	11.7822	12.2925	12.3396	17.9349	17.7481	17.0475	77.6095	79.5311	77.3048
TraesCS3B02G265500	1.417	8.9e-67	1.72	7.49e-101	2.393	4.02e-212	1.68258	1.67282	1.63362	4.87759	5.03298	4.87885	6.43872	6.45009	6.14944	12.9155	12.7352	12.3658
TraesCS4D02G104600	-0.531	9.87e-67	-0.622	2.07e-87	-0.152	4.5e-07	36.5401	37.0922	36.2658	28.4084	28.4683	27.58	26.7052	27.6278	28.3659	47.5425	47.673	48.2932
TraesCS3B02G183300	0.521	1.02e-66	0.643	1.31e-101	0.84	6.92e-179	103.108	101.628	101.652	170.511	159.184	158.233	183.868	186.143	184.013	266.055	265.085	264.435
TraesCS7A02G341800	0.653	1.02e-66	0.87	3.95e-120	-0.659	1.14e-52	32.9778	34.1954	33.3778	58.297	59.2993	57.9245	70.6697	73.2173	69.0005	30.5113	31.068	30.857
TraesCS2B02G570500	0.637	1.07e-66	0.745	3.38e-91	0.193	9.98e-07	20.1564	20.5899	19.9908	35.0197	34.6536	35.1491	39.6394	38.4327	39.7961	33.7239	33.4671	33.5369
TraesCS1D02G105800	-0.641	1.1e-66	-0.41	1.27e-28	-1.965	0	70.1433	73.0518	70.8715	50.3396	51.1462	50.9014	61.7044	60.8672	63.9704	27.1487	26.2003	26.2303
TraesCS1D02G395700	-1.484	1.57e-66	-1.461	9.96e-63	-1.413	1.18e-63	4.842	4.89765	4.80137	1.96835	1.86374	1.93727	1.96465	2.08249	2.07068	2.68052	2.66751	2.57332
TraesCS5B02G219400	1.309	1.79e-66	0.245	0.008934	-3.004	8.05e-82	3.10739	3.04117	3.29636	8.74522	8.65875	8.58122	4.2869	4.38735	4.28722	0.531906	0.580319	0.596138
TraesCS4D02G122800	-0.783	1.8e-66	-0.754	1.19e-60	-2.354	0	47.0973	47.4339	48.1549	30.3815	30.4975	31.1965	33.4855	32.3124	32.1547	13.7107	13.5794	13.2188
TraesCS5A02G227700	0.587	2e-66	0.513	2.05e-49	-0.592	1.86e-52	10.3498	10.1487	10.2292	17.0958	17.0586	17.0787	16.952	17.0663	16.7764	9.99613	9.74312	9.847
TraesCS3D02G105500	1.687	2.07e-66	0.377	0.001714	-2.609	1.61e-42	3.47965	3.73904	3.74103	13.2608	12.9897	12.9333	5.39225	5.57767	5.51591	0.834147	0.868989	0.903293
TraesCS6D02G084500	1.869	2.17e-66	1.148	3.75e-23	-1.776	1.43e-24	3.57411	3.74652	3.26705	15.0566	13.8094	14.0718	9.0584	9.3539	8.76447	1.4122	1.74465	1.32859
TraesCS4A02G070800	1.601	2.38e-66	1.208	1.06e-35	-0.811	4.79e-11	2.25209	2.33524	2.23706	7.57251	7.7022	7.70149	6.24555	5.82029	6.19279	1.78122	1.92151	1.94054
TraesCS2B02G007900	-2.316	2.38e-66	-1.562	4.04e-39	-10.819	2.51e-19	14.6856	13.9638	14.2817	3.32141	2.87625	3.37185	5.70679	5.59652	5.54098	0	0	0
TraesCS3B02G377300	-0.786	2.57e-66	-0.222	1.09e-06	-2.369	0	59.9235	57.2608	58.7662	37.3564	37.5462	38.3819	57.396	58.5862	58.7822	16.6446	16.4792	16.304
TraesCS4B02G135800	1.019	2.94e-66	0.972	4.75e-59	-1.497	1.99e-74	3.26416	3.51514	3.65903	7.86725	7.80595	7.80523	7.86258	7.89913	7.94368	1.7556	1.91722	1.69437
TraesCS6D02G294800	-1.483	3.21e-66	-1.562	1.14e-68	0.055	0.4931	9.42639	9.07789	8.48544	3.61082	3.49365	3.61175	3.52843	3.52878	3.52869	13.8802	13.2596	13.5513
TraesCS5D02G210700	-0.576	3.38e-66	-0.657	2.02e-82	-7.456	0	54.1869	54.4956	52.4205	39.7001	40.1941	40.0368	39.3502	40.3412	38.6665	0.411431	0.45988	0.459648
TraesCS4A02G099000	2.115	3.44e-66	2.422	2.01e-88	4.716	0	2.12067	1.98843	2.02264	9.68874	9.97812	9.81833	13.3139	12.321	12.4272	79.5741	75.657	78.6611
TraesCS2A02G268200	0.848	4.21e-66	0.941	2.88e-81	0.337	1.28e-10	13.4264	13.0599	12.8825	26.1186	26.4148	26.1253	28.9941	29.5399	29.021	24.0483	23.8002	24.3168
TraesCS3A02G443700	-0.356	4.38e-66	-0.374	4.34e-71	-1.537	0	188.19	190.026	188.577	164.421	163.519	163.566	169.279	169.019	168.046	95.081	92.2042	96.095
TraesCS2D02G434500	-0.413	6.07e-66	-0.928	2.26e-286	-3.312	0	124.027	125.661	122.752	104.107	102.226	104.109	74.851	76.0945	75.6807	17.7226	18.7159	17.9632
TraesCS6D02G045000	1.626	6.36e-66	1.326	6.02e-42	-0.034	0.8071	4.07104	3.36591	3.53065	12.5411	12.1551	12.8827	10.2362	10.6734	10.9349	5.28106	5.18317	5.08219
TraesCS6B02G424200	1.125	6.45e-66	0.371	5.85e-07	-1.375	1.4e-53	11.1581	12.1302	11.894	28.7692	28.5134	27.9127	18.0448	17.7867	16.858	6.65907	6.53408	6.48891
TraesCS7D02G451800	1.278	6.97e-66	0.081	0.4473	-2.048	1.86e-65	2.4568	2.36119	2.25681	6.32063	6.35966	6.36828	2.91003	2.88975	2.86911	0.869905	0.800392	0.811582
TraesCS4A02G259400	-1.633	7e-66	-0.856	5.83e-24	1.417	4.85e-108	8.96666	8.25668	8.9728	3.28749	3.04504	3.04476	5.60667	5.71609	5.44377	33.7392	33.4355	34.3086
TraesCS6A02G080600	-0.693	7.13e-66	-0.364	7.17e-20	-0.828	2.73e-92	23.66	23.8568	24.2883	16.2326	16.3927	16.6844	21.7295	21.2487	21.6449	19.725	19.299	19.6587
TraesCS7B02G327200	1.825	7.37e-66	1.073	1.37e-20	3.606	2.91e-291	2.41681	2.16274	2.39301	9.14587	9.10027	9.17262	5.96959	5.15234	5.861	40.3398	42.4041	40.4464
TraesCS6A02G184500	-2.432	8.35e-66	-1.436	1.46e-33	-0.239	0.02214	1.76317	1.75606	1.94894	0.374842	0.332523	0.417384	0.758839	0.78263	0.798422	2.1488	2.36302	2.21031
TraesCS7D02G277400	-1.006	8.35e-66	-0.465	1.41e-16	-0.635	1.39e-30	16.5528	16.8595	16.7598	9.53799	9.16633	9.01968	14.2213	14.1529	13.7335	15.805	15.2552	15.8248
TraesCS2B02G113800	0.567	8.58e-66	0.955	1.57e-195	1	7.01e-222	42.1134	42.6455	42.792	70.016	70.7818	68.937	96.4752	94.7949	95.124	124.442	122.212	123.645
TraesCS3B02G316500	-0.773	1.01e-65	-0.894	1.41e-82	-1.884	3.14e-276	20.6921	20.9072	20.6911	13.989	13.3262	13.1362	12.6182	13.1385	13.0571	7.95804	8.23328	8.30227
TraesCS7B02G003000	0.854	1.06e-65	-0.375	2.41e-10	-0.677	5.76e-31	4.81313	4.57499	4.78022	9.63098	9.34976	9.43913	4.24205	4.05632	4.35094	4.38253	4.27799	4.19713
TraesCS1D02G059200	0.582	1.13e-65	0.422	4.47e-33	0.564	1.75e-62	18.804	18.5394	18.4507	30.7783	31.167	30.7997	28.5933	28.8676	29.0931	40.3326	39.6391	39.6871
TraesCS6A02G094200	0.429	1.28e-65	-0.651	5.52e-117	-4.443	0	93.7873	94.6212	94.0273	141.952	140.711	139.575	70.077	69.1118	69.0788	5.97701	6.50817	6.36347
TraesCS5D02G255800	-0.954	1.42e-65	-1.168	2.63e-89	-1.841	3.86e-185	10.0395	10.2119	10.1746	5.75431	5.78705	5.88894	5.17252	5.21881	5.28736	4.19515	4.3763	3.75475
TraesCS2D02G209100	1.453	1.5e-65	1.166	3.32e-40	0.575	5.29e-10	9.88721	9.82806	10.1975	30.2969	30.3657	30.2466	26.8422	25.2848	25.6092	20.8936	22.2154	21.5446
TraesCS7B02G310900	0.927	1.66e-65	-0.186	0.00604	-4.346	6.03e-169	8.91512	9.03447	8.8875	18.7577	19.039	18.8271	9.08283	8.95731	9.28216	0.672151	0.570367	0.671878
TraesCS3B02G026700	1.285	1.66e-65	0.66	4.9e-16	1.124	3.99e-50	4.86486	4.3829	4.84887	13.1587	12.4043	12.5697	8.19118	8.68846	8.91581	15.5624	14.6072	14.4133
TraesCS3D02G280400	-0.428	1.93e-65	-0.819	1.8e-211	-0.29	3.04e-32	67.9212	68.1108	69.7439	56.8565	56.4703	56.4964	45.522	45.6311	43.9724	82.5026	81.133	80.5215
TraesCS3A02G398900	2.943	2.06e-65	1.325	8.73e-12	0.238	0.3086	0.475536	0.434842	0.394285	3.595	3.64838	3.89559	1.25197	1.32489	1.20839	0.821044	0.689746	0.722226
TraesCS5D02G186200	-0.548	2.11e-65	-0.509	9.02e-56	-0.538	1.28e-64	23.2596	23.2442	22.8959	17.6625	17.2776	17.7489	18.3893	18.7264	19.3457	23.218	23.3349	22.7962
TraesCS6A02G392000	-0.565	2.24e-65	-0.596	3.3e-70	-0.879	5.54e-147	20.5801	20.2213	20.5013	15.2643	15.4209	15.3127	15.6882	15.3318	15.9479	16.2493	16.0715	16.0634
TraesCS1A02G409700	1.238	2.56e-65	1.127	1.07e-52	-0.415	2.37e-06	11.3786	11.644	11.1226	29.3139	30.7566	29.3636	29.4206	27.4462	29.5169	12.5309	11.8418	12.7912
TraesCS5A02G118900	-0.192	3e-65	-0.159	2.1e-44	-0.047	4.16e-05	185.392	184.763	184.688	179.271	180.315	179.492	192.028	191.354	191.996	259.585	259.623	260.208
TraesCS5D02G150000	-0.502	4.31e-65	-0.128	2.8e-05	-0.909	7.7e-195	175.06	176.982	173.399	137.333	137.822	136.653	181.359	188.76	186.787	132.401	134.982	138.728
TraesCS2D02G242100	1.151	4.42e-65	1.068	1.11e-54	0.653	1.74e-20	6.79182	7.02791	7.14924	16.5822	17.4669	17.6456	16.2416	17.6283	17.0487	16.0195	15.9927	15.8427
TraesCS4D02G241100	1.356	4.42e-65	0.033	0.8013	-2.322	1.93e-70	3.01007	3.11762	2.7383	7.99555	8.64871	8.54524	3.39093	3.5315	3.58242	0.762101	0.949126	0.862407
TraesCS5B02G138300	3.475	4.72e-65	-1.228	0.0006565	0.441	0.09717	0.51663	0.409061	0.473902	5.84022	5.59454	5.84173	0.230648	0.253738	0.207599	0.962612	0.936689	0.858198
TraesCS4B02G028100	0.758	5.01e-65	0.487	1.21e-25	-0.838	4.71e-56	22.001	21.7321	22.6428	41.923	41.3371	41.3855	35.0394	36.8227	35.8882	17.9354	17.4435	18.5202
TraesCS3D02G536600	0.42	5.5e-65	0.637	1.1e-151	-3.724	0	447.106	445.769	443.053	653.86	662.848	667.368	811.636	797.11	797.543	50.7765	47.7245	48.2096
TraesCS4D02G308800	0.42	5.64e-65	0.735	5.74e-205	1.679	0	125.718	123.629	126.665	184.745	189.555	184.133	244.974	238.682	240.89	587.698	581.048	577.896
TraesCS1D02G253800	0.483	7.88e-65	0.329	3.93e-29	-0.824	5.02e-140	63.8892	66.3142	64.2611	101.149	100.469	100.06	93.9468	93.8921	95.04	53.7595	52.5757	53.0894
TraesCS1A02G086100	0.936	9.12e-65	0.985	4.89e-71	0.825	1.57e-50	8.2282	8.58083	8.43737	17.7264	18.1581	17.7309	19.3959	18.7637	19.6945	21.23	21.5003	22.1596
TraesCS3B02G565900	1.292	9.46e-65	1.319	8.23e-67	-1.207	4.63e-31	2.12771	2.12803	2.32723	5.99605	5.90324	5.9976	6.34098	6.20374	6.47931	1.42332	1.33973	1.37492
TraesCS2B02G225400	2.436	1e-64	0.778	4.67e-06	-1.726	5.47e-13	1.60982	1.70477	1.64251	9.86503	10.0804	9.83731	3.41593	3.55156	2.87501	0.762987	0.83937	0.572008
TraesCS1A02G058400	0.615	1.12e-64	0.255	5.86e-11	-1.117	9.42e-146	20.4686	20.8182	21.7248	36.2428	35.5079	35.3939	29.8195	28.4302	28.8163	14.0265	14.2198	13.8987
TraesCS2D02G301000	-0.541	1.17e-64	-0.182	1.73e-08	-0.788	4.16e-130	31.8037	31.3049	32.21	24.379	24.1461	24.182	32.6569	31.8791	32.7872	26.7143	26.2364	27.1677
TraesCSU02G265600	-2.414	1.36e-64	-0.591	9.4e-08	-4.365	3.73e-77	26.6857	29.7176	28.2748	6.23455	5.80661	5.59103	21.625	22.5883	20.9057	2.16822	1.76185	2.03188
TraesCS2D02G476900	2.841	1.39e-64	-0.195	0.4821	-0.39	0.1009	1.90292	2.41073	2.53896	18.4862	18.0668	17.9435	2.17486	2.37898	2.37893	3.06648	2.30009	2.2223
TraesCS7A02G144900	1.986	1.4e-64	2.398	9.16e-97	2.647	4.09e-122	2.89252	2.4108	2.96872	12.2297	11.5938	12.5529	15.8539	17.604	17.0472	24.7402	25.2357	25.2229
TraesCS1D02G045000	-1.236	1.64e-64	-2.19	3.17e-139	-2.409	2.51e-164	8.93166	9.68933	9.39466	4.52752	4.29649	4.37819	2.32372	2.35452	2.43091	2.43141	2.70758	2.51661
TraesCS4B02G087600	0.661	1.68e-64	1.001	5.59e-154	2.022	0	11.1084	10.9659	10.8155	19.3646	18.7956	19.5654	25.1043	25.4928	25.6595	64.8345	64.449	64.6196
TraesCS7A02G069300	0.951	1.68e-64	1.104	1.65e-87	1.738	3.35e-240	6.52963	6.76386	6.56521	13.9207	14.671	14.0137	16.6746	15.9099	16.8424	31.7171	32.1524	32.2864
TraesCS5B02G196900	-0.982	2.08e-64	-0.433	8.07e-15	-1.631	2.77e-145	17.5865	18.0681	18.6222	10.3496	9.83138	10.3314	15.6484	15.6033	15.2998	8.4178	8.6291	8.38809
TraesCS3B02G506600	-1.002	2.1e-64	-0.729	3.34e-36	-1.369	2.66e-109	11.2807	11.3095	11.1666	5.90006	6.49883	6.31664	8.05799	7.81238	7.71074	6.06493	6.47426	6.42197
TraesCS3B02G219700	0.226	2.42e-64	-0.06	4.51e-05	-1.612	0	249.738	251.06	252.278	327.079	325	325.702	278.722	278.9	278.851	118.027	118.572	120.936
TraesCS5D02G026000	0.444	2.76e-64	0.549	4.53e-98	-1.771	0	62.1794	62.731	63.5888	95.2351	94.2912	95.0518	108.136	106.868	104.287	26.5435	27.2275	26.3756
TraesCS2B02G372700	-0.597	2.95e-64	-0.457	2.62e-38	-1.42	1.08e-284	54.0347	53.7107	53.9609	40.0723	39.3696	39.2067	45.1132	46.0965	45.2352	29.6755	29.1431	28.8608
TraesCS2A02G389000	-0.48	2.98e-64	-0.232	3.38e-16	-0.854	6.15e-187	92.7364	95.1914	94.8093	75.6668	75.397	74.0274	93.2413	92.6546	92.851	76.5003	73.9688	76.5066
TraesCS4B02G042000	-0.766	3.09e-64	-0.629	4.82e-44	-1.867	1.09e-272	44.2634	43.6964	44.2618	27.587	28.7274	30.0082	32.779	32.509	33.7034	17.7937	17.4873	17.3245
TraesCS5D02G307000	1.292	3.28e-64	1.568	1.03e-96	1.533	2.2e-94	3.98329	4.04055	3.62709	10.2979	10.7541	10.6083	13.5322	13.311	13.1691	16.2451	15.9044	16.763
TraesCS6A02G216400	0.907	3.29e-64	1.118	5.37e-99	-0.018	0.8065	11.9628	11.6797	11.9472	24.325	25.0164	24.7182	29.9336	30.4198	29.0965	16.3515	17.2712	17.3772
TraesCS6D02G293400	0.555	4.63e-64	0.157	1.91e-05	-0.717	1.58e-81	58.1858	59.9803	58.7361	95.1119	96.9621	96.499	76.0862	74.61	77.6926	52.9295	51.8338	51.3675
TraesCS4A02G190400	-0.444	5.2e-64	-0.45	5.4e-64	-1.719	0	78.1813	76.6904	77.5715	62.7276	63.3429	63.5913	65.8931	65.1655	66.0401	34.4254	33.8947	34.1712
TraesCS6D02G195400	0.478	5.22e-64	0.272	3.13e-20	-0.99	1.48e-197	73.2258	72.718	72.7872	113.157	113.197	111.928	104.885	100.186	100.903	52.6797	53.4966	53.6171
TraesCS4A02G129400	0.506	5.85e-64	0.62	8.17e-96	0.748	5.39e-147	35.0229	35.5144	35.4117	55.8691	55.7526	55.4367	62.4205	63.3166	62.8159	85.0732	86.3793	86.7517
TraesCS1B02G440800	1.009	6.96e-64	0.995	4.83e-61	-0.428	1.59e-09	7.29044	7.31021	7.18348	15.766	16.3079	16.6104	16.602	17.0831	16.6032	7.63938	8.00074	7.86154
TraesCS5D02G538600	5.288	7.48e-64	-0.174	0.7821	1.3	0.0004515	0.280627	0.249485	0.218415	10.1634	11.2734	11.0332	0.200457	0.267302	0.300707	0.942125	0.829153	0.904073
TraesCS2B02G366900	-0.307	7.72e-64	-0.485	2.42e-150	-2.828	0	165.608	164.52	168.417	148.884	149.76	148.848	137.664	137.405	137.465	33.807	33.9048	34.1942
TraesCS6D02G146000	-0.872	8.22e-64	-0.884	1.69e-63	-1.664	1.8e-181	23.4616	23.3491	23.9421	14.4386	14.0431	14.4201	14.4217	14.7215	15.2434	10.9664	10.5748	10.8498
TraesCS1A02G282600	2.126	8.26e-64	-0.502	0.005261	-1.428	5.94e-14	2.12077	1.74233	1.79378	9.02812	9.24919	9.12729	1.48785	1.43388	1.70439	0.854384	1.06809	1.12855
TraesCS3B02G470500	2.091	9.12e-64	2.723	2.83e-112	0.137	0.4087	1.83822	2.07831	1.73284	8.86243	8.78888	9.06909	14.6436	15.1018	13.4457	3.12321	2.6405	3.25069
TraesCS6A02G154800	-0.95	9.31e-64	-0.694	7.26e-36	-2.058	4.79e-209	16.7768	17.1944	17.0771	9.28701	10.3802	9.66998	12.3125	12.0045	12.2168	5.9085	6.08353	5.79714
TraesCS2B02G604800	-1.034	1.18e-63	-1.068	2.88e-65	-2.197	4.74e-194	33.2185	33.6368	33.7787	17.9431	18.6229	17.9873	18.4604	19.3477	17.7977	11.0856	9.73829	11.0312
TraesCS3A02G438000	1.667	1.18e-63	1.824	1.17e-76	2.012	3.43e-97	3.11147	2.88766	3.2819	11.1523	11.0218	10.5369	12.6446	12.9162	12.4954	18.5654	18.2284	17.508
TraesCS1B02G290000	0.942	1.23e-63	0.468	9.85e-15	1.413	8.43e-154	14.6829	14.7513	14.6599	30.4668	31.8412	31.7114	23.9529	23.3882	23.2814	55.1556	57.2796	57.8899
TraesCS5D02G407500	2.927	1.25e-63	3.501	2.27e-93	5.62	5.21e-255	0.436106	0.45362	0.541142	4.06381	4.06523	3.94777	5.98114	6.52382	6.26198	34.1967	34.0736	33.8668
TraesCS7B02G133400	-0.549	1.27e-63	-0.876	3.89e-143	-1.713	0	15.4743	15.6119	15.7081	11.75	11.8773	11.8762	9.74969	9.90277	9.87357	6.9939	6.91288	6.81138
TraesCS5B02G290200	1.303	1.29e-63	1.543	1.1e-90	0.452	9.95e-08	6.33393	6.65484	6.65838	18.2473	18.131	17.4238	21.6281	22.2473	22.4181	13.1452	13.3012	12.5602
TraesCS7D02G022600	2.066	1.59e-63	1.147	7.6e-18	-0.946	4.04e-08	1.59432	1.63948	1.77518	7.98668	7.68798	7.60114	4.57144	3.99438	4.28303	1.19413	1.22139	1.35641
TraesCS3B02G430300	0.965	1.65e-63	1.063	7.15e-77	0.973	1.18e-65	10.9035	10.6343	10.64	23.6194	23.8873	22.233	26.6621	25.1877	26.0047	30.2229	30.3449	31.0729
TraesCS5B02G114900	-0.559	1.74e-63	-0.424	3.68e-37	-2	0	77.6566	77.7374	75.9523	58.3039	58.0931	57.9557	66.9716	65.6865	67.0873	28.3856	27.5143	27.9996
TraesCS2A02G289300	1.948	1.85e-63	2.367	1.31e-96	4.778	0	0.759419	0.804881	0.884705	3.47722	3.43495	3.57593	4.78503	4.96769	4.88255	31.4254	32.689	33.3982
TraesCS3B02G541300	-0.537	1.85e-63	-0.385	2.85e-33	-1.368	0	129.297	130.383	128.63	98.0316	101.302	97.6737	115.417	116.19	112.809	70.3528	71.9162	76.0639
TraesCS1D02G177700	2.299	2.23e-63	3.016	1.61e-113	-1.478	2.17e-11	2.77089	2.8217	2.4703	14.0548	14.4462	15.5561	24.5612	25.0495	25.9127	1.46133	1.52237	1.21728
TraesCS2A02G072800	1.322	2.28e-63	0.114	0.2942	-0.053	0.616	3.74434	3.83537	4.00032	10.925	10.4257	10.789	4.86475	4.63262	5.02017	5.24683	5.44413	5.50694
TraesCS7D02G224400	0.468	2.3e-63	-0.722	1.83e-113	-1.603	0	44.101	44.7839	44.27	67.3736	68.3614	68.7042	30.6476	31.0036	31.8573	21.6218	21.3935	20.6078
TraesCS3D02G242200	0.663	2.6e-63	0.376	2.08e-19	0.155	0.0003044	11.383	11.3034	11.1002	19.6874	19.7611	19.9486	16.8139	17.0271	16.9396	18.4743	18.1251	18.0037
TraesCSU02G135100	-0.377	2.62e-63	-0.727	2.8e-209	-0.741	1.8e-226	101.881	101.775	101.686	86.5088	86.3631	88.1151	71.2751	70.3862	72.0453	89.6143	88.3908	87.0405
TraesCS5D02G039300	1.326	2.91e-63	1.158	1.33e-46	-0.682	1.02e-11	6.39916	6.49566	6.24425	18.038	17.9222	17.31	16.442	16.546	16.4774	5.61773	5.77222	5.92315
TraesCS5D02G380100	1.251	3.02e-63	0.82	2.07e-25	-0.108	0.2563	8.10315	8.53093	8.21539	21.8059	21.7453	22.1182	16.5649	16.8712	17.3659	10.6525	11.6846	11.1205
TraesCS7B02G237100	1.994	3.19e-63	2.08	1.27e-68	-0.423	0.00764	2.0366	2.17454	2.12061	9.44563	8.78909	9.76476	10.38	10.2041	10.4103	2.42816	2.36187	2.06144
TraesCS2A02G322300	-0.871	3.72e-63	-0.728	6.53e-45	-1.536	1.64e-161	35.8627	35.9384	36.5545	22.7076	22.0425	21.031	25.4544	25.4193	24.8923	18.5758	18.1959	17.466
TraesCS2A02G513100	2.896	4.07e-63	2.941	7.96e-65	1.064	5.14e-08	1.09056	1.24655	1.16926	10.0816	9.33811	9.56135	10.4331	10.3924	10.3504	3.3422	3.48376	3.81138
TraesCS2A02G245200	1.279	4.21e-63	1.177	4.89e-52	0.346	5e-05	6.29617	6.89402	6.77825	17.8506	17.3132	18.6278	17.9046	16.8511	17.5222	12.4061	12.227	12.1847
TraesCS6B02G342400	-0.178	4.4e-63	-0.442	0	-2.692	0	671.529	670.605	676.472	660.471	660.893	659.246	575.67	571.965	573.817	153.368	149.693	150.204
TraesCS1A02G372400	-0.953	4.91e-63	-0.405	1.08e-13	0.585	1.05e-35	10.8475	11.2643	11.0125	6.28351	6.31316	6.39492	9.82883	9.38508	9.75289	23.73	23.8534	24.5329
TraesCS4A02G390200	-0.664	5.53e-63	-0.364	1.91e-20	-1.703	8.37e-302	327.948	321.376	322.521	226.463	220.94	233.431	290.458	290.486	293.401	144.985	139.821	148.456
TraesCS2A02G323000	2.572	6.15e-63	3.234	3.74e-103	6.491	0	0.695014	0.734841	0.69549	4.77831	4.49432	4.7605	7.70222	7.78809	7.66023	91.6551	93.5123	92.2416
TraesCS5A02G281600	1.51	6.44e-63	0.631	4.15e-10	-3.222	1.15e-55	3.49328	3.47083	3.74865	11.2366	11.2405	11.3938	6.32856	6.5262	6.35366	0.638851	0.527799	0.499767
TraesCSU02G247700	-2.09	7.76e-63	-0.573	2.68e-08	-3.846	1.05e-90	32.8526	30.1662	30.9677	8.16941	7.84967	8.49407	25.4695	23.5495	24.1497	2.9813	3.38818	3.11555
TraesCS2D02G238700	-0.354	9.74e-63	-0.408	1.33e-80	-1.827	0	200.354	199.128	202.199	174.168	173.951	174.491	172.091	174.662	178.454	82.5971	81.4764	81.941
TraesCS5B02G425900	-0.593	1.02e-62	-0.83	2.1e-112	-2.809	0	49.3501	48.8128	48.3162	35.7118	35.5719	36.5482	31.1573	32.5468	31.719	10.0413	10.0698	10.2292
TraesCS4A02G337800	-0.814	1.19e-62	-0.842	1.64e-64	-2.051	1.36e-260	16.7329	16.6156	16.8044	10.5268	10.3581	10.7738	11.011	10.6428	10.7549	5.79362	5.88474	5.88176
TraesCS4D02G264200	0.868	1.26e-62	0.987	4.33e-81	-2.569	1.33e-187	8.17945	8.36632	7.8932	16.7251	16.2606	16.526	18.5508	18.1407	19.4188	2.08288	1.97092	1.92188
TraesCS2A02G543900	0.872	1.58e-62	0.919	9.77e-69	-0.277	4.45e-06	10.1311	9.91035	10.1751	20.5436	20.0002	20.8508	22.2065	21.3354	22.6051	12.1101	11.9994	12.0828
TraesCS1A02G358600	-1.732	1.59e-62	-1.071	4.33e-29	-2.267	2.27e-89	9.51096	9.56342	9.23679	2.9334	3.66803	2.8608	5.13635	5.27347	5.19138	2.8352	2.83549	2.86486
TraesCS6B02G356800	4.174	1.74e-62	1.922	4.74e-12	-2.622	8.68e-06	0.0870332	0.174093	0.185072	3.06632	2.80656	3.06711	0.652777	0.594552	0.711114	0.026297	0.0394494	0.0394295
TraesCS1D02G030600	0.84	1.92e-62	-0.198	0.001281	-1.515	1.13e-110	13.2621	13.3058	13.1877	26.9075	25.777	26.3146	13.3162	13.474	13.3396	6.70373	7.05726	6.4239
TraesCS2D02G432600	-0.801	2.21e-62	-0.961	5.06e-83	-1.982	4.59e-259	26.6133	27.4908	27.0915	17.1193	17.2796	17.3221	16.277	16.2786	15.761	10.4438	9.69483	9.68993
TraesCS5D02G319700	1.754	2.77e-62	-0.482	0.0008828	-1.45	1.52e-20	4.0095	4.27002	4.04939	15.7312	15.3095	15.1301	3.34139	3.46106	3.4212	2.06398	2.15393	2.33225
TraesCS6A02G341900	0.857	2.88e-62	0.903	1.24e-68	-0.302	2.75e-07	15.0368	15.2142	15.4477	31.0137	31.0486	29.7981	33.5098	32.9501	32.5204	16.7219	18.5079	18.559
TraesCS5A02G073700	1.221	3.06e-62	-1.789	2.68e-65	-5.578	8.36e-84	15.1512	12.9436	14.293	35.9347	37.3852	36.398	4.6504	4.65086	4.90443	0.28612	0.572297	0.429006
TraesCS6B02G459200	-1.569	3.73e-62	-1.423	4.57e-52	-3.154	5.43e-129	3.33883	3.22037	3.19827	1.2469	1.14846	1.25483	1.48707	1.37674	1.35121	0.517592	0.517644	0.555707
TraesCS3D02G524000	1.858	3.82e-62	1.543	4.87e-41	-0.353	0.01635	3.44755	3.25863	3.44991	13.6926	13.1887	13.9868	11.0413	11.9355	11.2857	3.93776	3.84657	3.75309
TraesCS3D02G077500	-1.256	4.05e-62	-0.974	7.56e-40	-2.421	6.09e-150	10.6548	10.3318	10.8723	4.86932	4.8344	5.10861	6.48564	6.30212	5.99506	2.88472	2.83884	2.90662
TraesCS7D02G089000	1.123	4.19e-62	0.404	1.1e-07	-0.568	3.76e-12	3.93642	3.96345	4.20349	10.0043	9.77979	9.48755	6.24174	6.15743	6.14313	3.91141	3.97566	3.9577
TraesCS5B02G002600	-0.341	4.2e-62	-0.246	1.06e-32	-1.064	0	107.587	109.772	107.549	93.6818	94.1426	97.0079	105.558	105.619	106.146	75.6015	75.0695	74.762
TraesCS2A02G035300	2.154	4.34e-62	2.447	2.93e-81	-8.722	6.84e-13	1.22815	1.3693	1.30959	6.60122	6.14012	6.5643	8.47808	7.70221	8.50028	0	0	0
TraesCS6A02G108100	0.957	4.81e-62	1.002	1.89e-67	0.384	3.77e-10	14.6721	14.7794	14.4719	31.4888	31.4662	31.6984	34.143	32.7955	34.971	27.3819	27.4269	28.3861
TraesCS3A02G311900	2.737	4.84e-62	1.85	2.28e-26	-3.836	1.25e-13	1.14528	1.02797	0.969743	7.85461	7.85735	7.54687	4.2163	4.34259	4.56276	0.0709834	0.141981	0.106432
TraesCS7A02G364100	1.618	5.04e-62	1.21	1.13e-32	1.486	1.73e-52	2.61138	2.92328	3.06868	9.41678	9.97149	9.92463	7.95769	7.49637	7.59888	11.4952	11.6121	11.8668
TraesCS4B02G117800	0.948	5.49e-62	-0.176	0.01439	-3.136	5.69e-166	8.86041	8.33532	8.49777	18.4184	18.021	18.5745	8.89212	8.68617	8.76118	1.50557	1.33606	1.39898
TraesCS3B02G153400	-3.034	5.65e-62	-1.819	4.12e-38	-0.707	8.1e-10	7.02983	7.39332	7.10717	0.972693	1.00778	0.938196	2.48488	2.36863	2.21326	6.61304	6.13191	6.39147
TraesCS5A02G486000	0.993	5.8e-62	0.445	1.05e-11	2.174	0	8.15264	8.26528	9.07213	18.6853	18.4782	19.16	12.7927	13.7726	13.6291	54.6506	56.5407	55.7586
TraesCS2B02G521700	-0.694	5.84e-62	-0.81	8.91e-80	-1.35	3.35e-198	26.3465	26.302	27.2871	18.4822	18.5817	17.789	17.9186	17.4004	17.4867	15.7941	14.6032	15.1038
TraesCS4A02G395700	0.889	6.18e-62	0.073	0.3069	-1.426	5.58e-91	13.0588	13.3362	13.573	26.4246	27.6444	28.104	15.8365	16.1823	16.6738	7.04541	7.12933	7.403
TraesCS4A02G177600	-0.314	6.53e-62	0.215	2.84e-32	1.561	0	115.262	115.995	114.785	102.081	103.374	103.498	156.244	154.3	154.488	495.386	490.704	495.353
TraesCS5D02G326500	-0.526	6.77e-62	-0.754	2.15e-116	-2.172	0	38.3583	38.7934	38.3079	29.7802	29.3938	29.8613	26.3381	26.3571	26.5864	12.7614	12.5219	11.9046
TraesCS6A02G070500	0.925	1.03e-61	0.225	0.0005965	0.079	0.244	7.3439	7.4759	7.3653	15.5235	15.6701	15.5589	10.0595	10.1305	9.83236	11.584	11.1502	11.2632
TraesCS2B02G417300	1.912	1.07e-61	2.207	1.22e-83	0.924	1.12e-13	4.54586	4.01789	4.3374	18.4963	17.6917	17.6901	23.3911	24.0164	21.5803	12.3298	11.6282	11.5585
TraesCS3A02G135800	-0.359	1.12e-61	-0.278	3.63e-37	-2.371	0	122.701	121.283	121.505	104.337	105.411	106.702	114.505	116.392	118.286	34.447	33.9036	34.1716
TraesCS6D02G122000	-5.528	1.16e-61	2.107	8.31e-196	-6.733	7.7e-43	9.38712	9.49566	9.57214	0.273742	0.205378	0.20536	47.4603	46.2793	48.1905	0.129413	0.172568	0.0862407
TraesCS7B02G095200	-0.743	1.18e-61	-0.434	8.74e-23	-0.84	4.07e-78	53.6886	55.4661	56.3364	36.9705	36.0503	36.7255	47.2433	47.3427	47.2468	44.9512	43.9934	45.2535
TraesCS3D02G194700	-0.539	1.49e-61	-0.67	4.98e-89	-1.321	6.12e-297	34.3474	35.3691	34.8196	26.7237	26.2744	26.8453	25.2555	25.21	25.6418	20.3225	20.5052	19.8809
TraesCS2D02G288200	-0.729	1.52e-61	-0.532	5.25e-34	-1.59	7.74e-224	31.8693	32.5902	32.1382	21.4886	21.4014	21.8018	25.498	25.8443	26.0289	15.0369	15.844	15.6869
TraesCS2B02G501000	2.004	1.59e-61	-1.663	8.09e-17	-1.264	6.41e-13	7.93805	7.84245	8.04036	36.0086	34.1645	35.9251	2.69684	3.21578	2.80077	5.14795	4.32939	4.91196
TraesCS7D02G260700	-0.54	1.63e-61	-0.476	1.78e-47	-1.137	6.31e-234	47.4427	48.2236	47.098	37.1541	36.1971	35.6422	39.719	39.8717	39.3182	30.8029	31.3334	32.0844
TraesCS3A02G280600	-0.522	1.66e-61	-0.667	3.15e-96	-0.767	7.21e-129	84.7087	86.6924	89.9811	66.3481	67.3792	68.3807	64.6298	63.3223	62.6873	76.6847	73.702	72.4745
TraesCS5A02G389100	1.167	1.66e-61	1.765	2.86e-150	3.379	0	3.40933	3.02784	3.31257	8.11014	8.018	8.18005	12.5203	12.7489	13.0972	49.7709	48.3053	49.1355
TraesCS1D02G111600	2.486	1.77e-61	0.361	0.07568	-0.284	0.1717	1.03297	1.30371	1.20596	7.23858	7.02883	7.7593	1.81832	1.68672	1.76575	1.21872	1.42694	1.57478
TraesCS2A02G434800	-0.69	2.16e-61	-0.948	2.15e-105	-2.246	0	40.7623	40.8162	40.7186	28.7258	27.9814	27.4303	25.0816	23.4237	24.9302	12.8205	11.8421	12.7577
TraesCS5D02G551200	-0.54	2.54e-61	-0.486	2.92e-49	-1.06	6.1e-206	36.6525	35.7751	36.5958	27.4585	27.8444	27.9359	30.0059	30.0264	30.1132	25.4684	25.2141	25.1816
TraesCS3D02G210800	0.488	2.56e-61	0.647	2.15e-108	-1.426	0	62.3387	63.5295	61.2572	96.8802	97.0246	97.3748	115.625	111.962	111.713	33.4932	34.4367	33.0968
TraesCS1A02G374200	-0.734	2.56e-61	-1.017	8.13e-106	-2.665	0	74.4499	77.353	73.4676	50.7338	50.3059	49.3606	42.7069	43.3196	42.9314	17.7838	16.3503	17.4024
TraesCS5D02G230500	1.051	2.92e-61	1.34	3.99e-102	2.27	0	5.58694	5.60617	5.7195	12.6855	13.0072	13.2175	16.4228	16.0897	17.0739	39.559	38.8077	39.9648
TraesCS5A02G494200	2.319	3.09e-61	2.959	2.09e-103	-0.099	0.6323	1.36253	0.946986	1.10926	6.17693	6.44485	6.31139	10.3679	10.1709	10.2449	1.56301	1.4236	1.64608
TraesCS6A02G036100	2.761	3.45e-61	1.557	1.4e-17	1.142	7.88e-10	0.604846	0.535803	0.587967	4.37377	4.42501	4.20918	1.96275	1.9259	1.99993	1.83798	1.7755	1.92075
TraesCS2D02G256000	1.191	3.45e-61	0.872	5.28e-31	1.661	2.04e-127	5.66533	5.55103	5.32353	13.7548	14.0025	14.1558	11.4743	11.426	12.1661	24.8555	25.9158	25.1237
TraesCS1A02G375800	-0.526	3.54e-61	-0.114	0.0006403	-0.979	6.16e-189	70.2889	70.0881	70.337	53.7108	54.8598	53.9275	74.1147	74.7696	76.6783	51.9347	51.6112	51.5851
TraesCS7B02G219800	0.972	3.63e-61	0.853	1.35e-45	0.893	4.24e-52	8.82822	9.01895	9.49743	19.6271	19.8382	20.086	19.0706	19.0978	19.0466	24.057	24.6888	24.9623
TraesCS3A02G226800	0.46	3.69e-61	-0.064	0.05876	-1.125	1.07e-248	89.8428	92.0795	90.8018	139.028	139.189	138.091	101.779	99.2822	100.993	60.3714	59.6704	61.3833
TraesCS1A02G135700	-0.515	4.78e-61	-0.635	6.82e-88	-1.428	0	46.7516	46.6218	48.2392	36.1742	37.1715	36.6758	35.6263	34.9696	35.0055	25.5425	26.0415	24.7672
TraesCS6D02G369600	-2.027	5.87e-61	-1.762	5.52e-49	-3.518	2.21e-97	2.93698	3.02951	2.81922	0.829684	0.71519	0.847555	0.887839	1.08524	1.02602	0.445094	0.333853	0.333685
TraesCS5A02G265800	3.377	7.79e-61	2.81	9.27e-41	-0.264	0.394	0.336375	0.320406	0.336605	3.90043	3.88643	3.67104	2.7632	2.76347	2.54027	0.348464	0.406582	0.445079
TraesCS7B02G451500	0.798	8.09e-61	0.104	0.08692	-0.987	7.89e-63	13.1175	13.3684	14.0462	26.5829	25.9311	25.7083	16.8865	16.4573	17.093	10.1603	9.95295	9.55464
TraesCS5B02G278600	0.953	8.39e-61	0.815	7.54e-43	0.069	0.3361	6.43874	6.36061	6.33233	13.6042	13.7304	13.7898	13.0521	12.799	13.1208	9.67472	9.65656	9.78547
TraesCS5D02G152400	3.763	8.4e-61	-0.669	0.08563	0.631	0.02893	0.330943	0.330993	0.372565	5.23494	5.09791	5.25612	0.177298	0.288138	0.288131	0.724956	0.875035	0.724663
TraesCS6A02G385000	1.985	8.5e-61	2.667	1.98e-115	2.789	2.27e-129	0.535165	0.587045	0.595995	2.52389	2.50822	2.51627	4.28212	4.17155	4.1807	5.80033	5.78004	5.65198
TraesCS2A02G204800	-0.146	9.09e-61	-0.592	0	-2.6	0	978.775	974.029	979.389	978.695	985.739	977.672	753.338	748.44	750.696	234.202	233.268	234.278
TraesCS7A02G456600	-1.57	9.74e-61	-1.168	1.94e-37	-4.379	2.34e-121	19.586	19.589	19.7969	6.81071	7.42816	7.80594	10.3608	9.83313	10.203	1.6099	1.19264	1.31124
TraesCS2B02G425600	-0.579	1.03e-60	-0.155	1.69e-05	-2.087	0	53.0696	53.4659	52.355	39.2925	40.0259	38.7568	55.7814	55.066	54.3993	18.5758	18.3587	17.3491
TraesCS3B02G137100	0.789	1.04e-60	0.018	0.8105	-0.619	1.38e-28	7.5101	7.12201	7.29421	13.7643	13.9406	14.363	8.55404	8.45343	8.71247	6.86472	6.83997	7.01442
TraesCSU02G020100	1.308	1.05e-60	-0.278	0.007489	-0.228	0.019	2.78864	2.86411	2.76552	7.42084	7.83118	7.89042	2.71998	2.81404	2.50578	3.68772	3.31021	3.4294
TraesCS1A02G193500	-0.373	1.14e-60	-0.109	3.42e-06	-1.28	0	101.782	101.979	101.988	87.0726	87.1682	87.8114	110.027	108.461	109.744	60.303	61.4582	60.9349
TraesCS2D02G023900	-0.492	1.71e-60	-0.494	2.17e-59	-1.714	0	80.9915	81.6501	81.1352	63.9348	64.2388	64.1766	66.7686	65.9255	67.7806	34.7109	36.2406	36.8964
TraesCS1B02G075200	-0.408	1.74e-60	-0.792	6.57e-204	-2.695	0	67.3344	66.556	66.6619	56.3719	55.811	55.6303	45.85	44.3457	43.9674	14.4653	15.2837	15.1909
TraesCS1B02G189400	-0.658	1.8e-60	-1.159	4.61e-155	-0.465	5.09e-33	117.922	119.461	115.645	82.9472	82.8303	82.5311	62.32	59.9634	60.8582	121.57	123.787	125.654
TraesCS5B02G320700	-0.502	1.94e-60	-0.803	3.47e-139	-1.911	0	34.7728	34.2064	34.2732	27.2262	26.9908	26.7317	23.1707	22.4431	22.9378	12.774	13.4809	13.5769
TraesCS5D02G568500	0.78	1.96e-60	1.155	1.62e-137	0.024	0.6927	28.8431	28.7138	30.8257	57.4824	55.7924	55.2315	75.6615	76.2421	76.0971	44.3963	42.7303	43.3011
TraesCS2A02G336000	-0.843	1.98e-60	-0.374	9.03e-14	-0.336	3.53e-12	14.2402	13.8431	14.7975	8.78935	8.87751	8.86251	12.9448	12.534	12.8507	16.3707	16.3544	16.5606
TraesCS7D02G359100	1.027	2.13e-60	0.625	5.52e-21	1.092	4.79e-70	7.0871	6.71512	7.15417	15.4361	15.998	15.9568	12.2342	12.5019	12.7014	21.3385	21.8165	21.6553
TraesCS4B02G140200	-0.413	2.15e-60	-0.194	2.04e-14	2.617	0	51.8533	51.6031	52.2505	43.4083	43.1594	43.2215	52.5907	52.7249	52.2995	463.731	462.384	460.466
TraesCS2A02G309600	-0.607	2.25e-60	-0.66	1.89e-68	-0.993	7.4e-147	26.5689	27.2478	27.0672	19.5921	19.6996	19.6546	19.8086	19.2322	20.2279	19.6979	19.6093	19.6537
TraesCS2B02G360500	-0.969	2.39e-60	-1.014	4.32e-63	-1.577	2.18e-132	26.8306	26.0893	26.9507	15.037	14.9448	15.3007	14.9186	15.5009	15.3916	12.8972	13.1033	12.8511
TraesCS7D02G413500	1.595	2.65e-60	1.664	2.23e-65	0.949	1.25e-20	3.28407	4.29757	4.36128	13.3291	13.5398	13.1854	14.5685	14.2739	14.9971	11.7961	11.0924	10.5677
TraesCS5A02G384600	1.507	2.8e-60	1.618	1.57e-69	0.016	0.912	4.19388	3.77785	3.94662	12.0884	12.8917	12.6242	14.4034	14.2858	13.6902	6.17644	5.47207	5.8384
TraesCS2B02G323100	-0.611	2.97e-60	-0.655	2.03e-66	-1.348	4.58e-237	34.152	34.4473	34.2528	25.2695	24.6663	24.7938	25.6317	24.826	25.1984	19.7031	19.8219	19.0877
TraesCS3A02G258600	-0.878	2.97e-60	-1.086	7.6e-84	-0.738	1.66e-45	16.9331	17.4654	17.0683	10.3935	10.1431	10.5485	9.61086	9.47936	8.9872	15.3863	15.1104	14.2921
TraesCS5B02G163700	0.732	3.62e-60	0.7	6.4e-54	-0.783	3.43e-50	9.67516	9.58393	9.71657	18.2953	17.4128	17.7223	18.3372	18.2397	17.9289	8.38841	8.36124	7.6851
TraesCS6D02G068300	1.021	4.14e-60	0.273	0.0001757	0.348	2.46e-07	5.42953	5.6822	5.9687	12.8998	12.9798	12.5862	7.80738	8.12857	7.95974	10.5564	10.7097	10.286
TraesCS6D02G206200	6.545	4.44e-60	0.781	0.1832	-4.929	0.0001619	0.0416264	0.145715	0.104137	10.4755	9.74058	9.99915	0.156106	0.200727	0.223025	0	0	0
TraesCS4D02G026800	0.651	4.97e-60	0.605	1.13e-50	2.27	0	13.1005	12.5037	12.385	21.675	22.1098	22.4148	22.1665	22.1836	22.5859	87.5789	88.7992	89.4439
TraesCS5D02G418400	1.559	4.99e-60	1.694	4.46e-71	-1.529	6.86e-27	3.26956	3.12473	3.44145	10.7501	10.7306	10.6832	11.6516	12.8725	12.3272	1.78553	1.58079	1.57999
TraesCS2B02G236200	-2.082	6.27e-60	0.22	0.03276	-10.699	6.11e-19	2.68872	2.62755	2.52625	0.718194	0.649553	0.688856	3.41968	3.59597	3.56289	0	0	0
TraesCS3B02G219400	0.585	6.85e-60	-0.014	0.7989	-2.818	0	55.7386	56.2068	56.613	93.4523	93.7253	93.5965	63.3936	65.146	64.7415	11.9177	11.6664	11.1052
TraesCS6D02G226100	1.801	7.8e-60	-0.548	0.0003169	-0.352	0.01336	1.26768	1.2313	1.24416	4.75606	4.85124	4.87417	0.953416	1.00576	1.00573	1.53212	1.53227	1.1928
TraesCS2B02G546700	3.349	7.86e-60	1.796	1.16e-15	-2.039	3.26e-07	0.829565	0.869201	0.869663	9.27837	10.3045	9.47017	3.55543	3.25946	3.51336	0.381946	0.23874	0.286344
TraesCS1D02G146600	0.806	8.01e-60	-0.531	1.03e-19	-3.214	8.87e-235	6.44416	6.44515	6.71178	12.581	12.5944	12.8544	5.22386	5.3049	5.18398	1.07857	1.06732	0.919247
TraesCS2D02G174800	1.34	8.17e-60	1.714	5.97e-101	1.104	2.91e-40	4.60492	4.83981	4.52997	13.1193	13.3484	12.7983	18.1751	17.8145	17.0893	15.0614	14.0252	14.4895
TraesCS6D02G095800	1.821	8.61e-60	-0.659	2.08e-05	-3.314	5.17e-36	2.19174	2.19208	2.28277	8.6406	8.901	8.59993	1.6295	1.67759	1.58169	0.270299	0.405489	0.297209
TraesCS3D02G148700	0.829	8.74e-60	-0.205	0.0007613	-1.676	1.52e-135	31.308	30.3576	31.5788	59.0735	63.355	61.438	30.5649	31.1908	31.9465	14.453	14.8559	13.0426
TraesCS2A02G046100	0.568	1.12e-59	0.199	2.05e-07	-1.481	2.57e-232	13.2444	13.4219	13.6826	22.115	22.0106	22.2609	17.9503	17.858	17.8159	6.86694	7.04432	7.06431
TraesCS4A02G090200	-0.646	1.15e-59	-0.956	1.4e-115	-0.447	2.87e-31	32.1305	32.3373	32.1121	22.2122	23.0909	23.2243	18.6408	19.6158	19.3991	34.6617	34.3724	33.7943
TraesCS7D02G073000	1.111	1.19e-59	0.662	8.29e-20	-0.492	2.21e-09	13.6084	13.8427	13.2459	32.0588	33.2726	32.2452	24.4344	25.1834	24.934	13.8088	14.4838	13.691
TraesCS3D02G366700	1.348	1.26e-59	0.74	1.35e-16	0.543	1.43e-09	1.25853	1.1788	1.20608	3.44085	3.41651	3.44173	2.31882	2.32618	2.40462	2.42242	2.65607	2.62255
TraesCS3D02G310200	1.297	1.27e-59	0.846	9.12e-24	0.531	6.09e-10	3.076	3.42759	3.63016	9.27946	9.04222	9.31391	7.07535	7.1477	6.87883	7.15243	7.19356	6.90717
TraesCS3B02G373000	-0.535	1.35e-59	-0.615	2.75e-75	-0.938	3.6e-167	39.613	38.8839	38.4408	29.7345	30.0054	29.8648	28.7813	30.2738	29.3656	30.2436	29.1843	29.1696
TraesCS2B02G309800	-0.539	1.63e-59	-0.405	2.3e-34	-1.076	1.24e-205	33.6737	33.6323	33.3239	25.7783	25.8617	25.2639	29.1106	29.6458	29.2292	23.3042	23.2127	22.7508
TraesCS3B02G096600	-1.159	1.78e-59	-0.892	1.73e-37	-0.349	6.25e-08	16.0379	14.7604	15.2042	7.62237	7.62503	7.62433	9.74452	9.36615	9.59936	17.3101	17.7397	17.3689
TraesCS4D02G066200	0.901	2.13e-59	0.979	7.68e-70	-0.949	3.87e-44	13.8109	12.9352	13.0454	28.2377	26.7374	27.5023	29.6237	30.3735	30.8431	9.8903	10.5153	9.51204
TraesCS5D02G256100	-1.039	2.17e-59	-1.24	2.65e-77	-5.385	4.14e-189	13.8006	13.2154	13.257	7.10368	7.35463	7.30427	6.32935	6.8112	6.60745	0.396631	0.459302	0.542538
TraesCS7D02G255400	-2.021	2.53e-59	-0.475	0.0003797	-3.58	1.38e-179	1272.38	1411.35	1019.57	345.457	325.085	342.087	1123.51	1094.18	867.565	131.643	160.839	156.734
TraesCS7B02G392600	-0.372	2.67e-59	-0.656	3.32e-166	-0.364	4.99e-58	58.6344	58.5393	59.481	50.3177	50.3602	50.8417	43.6058	42.8997	43.3305	65.7597	66.5361	66.9265
TraesCS1A02G191700	1.602	3.36e-59	1.613	2.09e-59	-0.74	1.05e-08	3.37799	3.3519	3.2206	11.2707	11.4277	10.84	11.5138	12.3415	11.4006	2.70032	3.21498	2.73136
TraesCS1B02G290800	1.048	3.67e-59	0.417	5.46e-09	-1.459	7.42e-61	9.84269	9.57074	9.63055	22.4367	21.8415	22.3639	15.1748	14.4145	15.3224	5.41921	5.25452	4.65731
TraesCS2B02G620600	0.878	3.67e-59	0.806	1.28e-48	0.047	0.4915	11.5081	11.3966	10.8359	22.9774	23.4634	22.3751	22.501	22.8917	22.9154	16.7561	16.6209	17.1872
TraesCS3B02G160300	2.092	3.99e-59	1.094	9.37e-15	-3.38	1.13e-25	1.92122	1.76779	1.64056	8.30055	8.20518	8.72028	4.06217	4.50177	4.61146	0.247677	0.34059	0.154736
TraesCS5D02G372300	0.466	4.74e-59	-0.292	2.35e-20	-5.315	0	46.3746	45.0923	46.37	69.647	71.2734	70.4137	42.9381	43.4288	43.9726	1.64589	1.75579	1.62329
TraesCS3D02G102300	-0.491	4.99e-59	-0.796	3.48e-140	-3.029	0	54.3912	55.2101	54.897	43.3554	43.2669	43.2975	36.8005	37.441	35.4716	10.0347	9.3173	9.90007
TraesCS3D02G223500	1.41	6.27e-59	0.991	2.33e-27	-1.302	2.55e-26	3.32395	3.5502	3.3673	10.0516	10.3306	9.83777	7.7826	8.04721	7.73921	2.05826	1.93446	2.03263
TraesCS3D02G287400	0.901	6.35e-59	0.868	1.56e-53	0.704	7.79e-36	14.4222	13.5887	13.6269	28.1571	29.0573	29.114	28.8833	29.8147	29.3165	32.3926	32.6951	33.3142
TraesCS6B02G387400	0.256	6.54e-59	-0.499	1.34e-189	-1.199	0	51.4782	51.6118	51.5736	67.7775	68.6655	68.5178	42.189	42.8077	41.7415	32.7816	32.5472	32.4516
TraesCS1A02G443900	-0.717	6.66e-59	-0.391	4.35e-19	-0.52	7.68e-34	29.631	28.3294	29.5386	19.2328	19.7578	20.1014	25.7899	25.8166	25.6953	28.8455	29.9642	29.7586
TraesCS2B02G468200	0.956	6.97e-59	0.75	7.81e-35	-1.1	1.52e-48	9.0203	8.68161	8.46607	18.7908	18.7398	18.834	17.6585	16.7386	16.5668	5.53555	5.99543	6.18571
TraesCS6D02G236600	1.71	7.35e-59	1.655	3.91e-54	2.191	1.86e-102	1.02382	0.970083	1.06766	3.62645	3.66906	3.82374	3.67205	3.77635	3.71852	6.61675	6.77373	6.90051
TraesCS7A02G033500	0.876	9.2e-59	0.981	1.54e-73	1.568	2.63e-208	4.30219	4.37986	4.53629	8.99626	8.84249	9.1001	9.9825	9.93191	10.303	18.7977	18.7763	19.3017
TraesCS3D02G322700	-2.912	1.14e-58	-2.958	2.06e-56	-1.519	1.62e-29	3.28041	3.44661	3.39871	0.508262	0.460773	0.52428	0.532556	0.550362	0.426077	1.78211	1.84236	1.50117
TraesCS2B02G271900	-0.683	1.16e-58	-0.956	4.29e-103	-2.161	0	17.3627	17.3536	17.3746	11.9282	12.2823	11.8071	10.5694	10.2551	10.2675	5.80453	5.53477	5.56042
TraesCS3B02G241000	-0.675	1.18e-58	-0.6	2.77e-46	-0.433	5.15e-27	28.7739	28.8599	28.4671	20.4689	20.1436	19.2617	21.872	21.8741	22.0266	30.8573	30.4906	31.1651
TraesCS6B02G280400	2.44	1.24e-58	-0.323	0.1583	-1.94	1.22e-13	0.634899	0.560291	0.635334	3.90263	3.51001	3.61713	0.533552	0.586964	0.573611	0.240733	0.22571	0.225596
TraesCS6A02G282500	-1.115	1.24e-58	-0.796	2.41e-32	-0.244	0.0001103	6.21662	6.07177	6.26256	3.11465	3.10575	3.28521	4.02781	4.12863	4.2178	7.23651	7.74069	7.74936
TraesCS3B02G430000	-0.845	1.29e-58	-1.526	4.54e-149	-2.548	1.01e-291	14.8771	15.1609	14.5774	9.35087	9.30014	8.92138	6.10774	5.89719	5.94229	3.74238	3.64068	3.68985
TraesCS4A02G194100	0.907	1.57e-58	-0.661	7.06e-22	-2.066	2.97e-128	15.8821	15.8845	16.2454	33.5214	33.0725	33.3766	11.8709	11.9064	11.3914	5.92104	5.34108	5.37706
TraesCS3B02G179100	-0.764	1.6e-58	-0.551	7.42e-32	-0.434	7.3e-22	17.0314	16.8055	16.7839	10.8072	11.3808	10.9123	13.1071	13.4675	13.4345	18.4483	17.8794	18.0544
TraesCS4B02G015800	1.342	1.66e-58	0.953	8.97e-28	-0.625	2.44e-09	8.56058	8.33775	7.84883	23.2457	23.5547	22.8648	18.4409	17.9624	19.0666	7.47533	7.96364	7.85132
TraesCS5A02G121600	0.393	2e-58	0.007	0.8555	0.361	6.2e-50	8.98246	9.07281	9.04317	12.994	13.2242	13.2946	10.4086	10.5695	10.56	16.9675	16.5564	16.9676
TraesCS4D02G323400	0.685	2.13e-58	0.244	1.83e-07	-1.454	1.74e-150	23.0775	22.5847	23.0188	41.1554	40.8128	40.5949	31.5335	30.8718	31.8018	12.4462	12.5974	11.3319
TraesCS6D02G192700	2.642	2.49e-58	2.764	6.69e-64	-0.321	0.174	2.59489	2.30692	2.59667	17.1373	17.0742	17.7638	20.3121	19.5417	19.155	2.61348	3.04936	3.04782
TraesCS7B02G131400	-1.281	2.52e-58	-1.23	3.86e-53	-4.154	3.48e-168	4.36858	4.56899	4.62971	2.01826	2.19453	1.98686	2.30921	2.22918	2.1578	0.372104	0.372141	0.3619
TraesCS4B02G203100	-0.493	2.78e-58	-0.541	1.14e-67	-2.577	0	100.465	102.481	103.694	81.31	80.0596	80.4897	80.499	83.2519	80.3922	24.895	24.2612	25.3936
TraesCS4D02G174500	0.592	3.08e-58	0.012	0.8352	-0.315	1.04e-14	40.1006	41.5996	39.8957	67.0938	68.326	68.097	47.3736	47.0939	47.5549	48.0245	46.3855	47.444
TraesCS5D02G142300	0.646	3.48e-58	0.538	5.01e-39	0.582	6.8e-48	15.4969	15.6793	14.9671	27.2031	26.3651	26.5824	25.7922	26.0052	25.7766	33.4836	33.6056	33.1735
TraesCS2A02G272400	-0.25	3.51e-58	-0.555	2.45e-261	-1.11	0	104.157	104.581	105.103	97.4887	96.9919	98.4916	82.5799	81.922	82.815	70.0019	70.0441	71.006
TraesCS5B02G177200	1.18	3.86e-58	1.035	2.73e-43	0.27	0.001138	2.42484	2.54647	2.51749	6.3831	6.15278	6.29755	5.89997	6.07377	5.79214	4.13954	4.35977	4.60169
TraesCS1B02G443200	-0.397	3.93e-58	-0.408	7.86e-60	-1.756	0	82.3118	82.6313	82.9208	69.3412	70.0716	69.5356	72.7214	71.4134	72.2008	36.292	35.727	34.4981
TraesCS6A02G123900	1.514	4.03e-58	0.504	3.54e-06	-1.307	4.61e-23	4.63983	3.99439	4.37854	13.457	14.2503	13.5449	7.01669	6.95444	7.39482	2.51991	2.55566	2.55437
TraesCS3A02G185800	-0.6	4.06e-58	-0.581	2.04e-53	-0.636	5.81e-66	49.8279	50.5506	49.2566	36.4068	36.024	37.1282	39.8947	38.3957	37.5403	46.1634	46.9657	46.6098
TraesCS2A02G514300	1.587	4.23e-58	1.737	6.13e-70	1.795	4.76e-77	2.8043	2.571	2.47883	8.82703	8.76288	8.60521	9.86556	10.1921	10.267	12.8792	13.4454	13.2128
TraesCS5D02G125700	0.721	4.34e-58	1.211	2.27e-173	0.909	2.35e-96	16.7662	16.1905	16.1991	29.7303	30.1621	30.0706	43.437	44.3086	44.035	43.7692	45.5346	44.6455
TraesCS2D02G467300	-0.561	4.69e-58	-0.996	1.1e-156	-1.511	0	28.9379	29.4772	28.8732	21.8052	21.6643	22.2292	17.0564	16.7715	16.8616	15.1226	14.5287	14.7934
TraesCS7D02G043700	-0.739	4.96e-58	-0.436	6.76e-22	0.838	4.23e-106	23.8484	24.3291	24.2553	16.8148	15.6355	15.738	20.5818	20.5373	20.9086	62.9655	61.7925	63.1233
TraesCS6A02G312200	-0.239	5.84e-58	-0.365	2.97e-131	-2.037	0	855.479	848.437	854.562	785.229	806.237	814.842	763.396	769.51	767.955	297.832	302.486	304.561
TraesCS4A02G269400	-3.943	7.08e-58	-3.247	1.72e-54	-2.602	4.85e-52	9.11701	9.21439	9.07524	0.598022	0.690267	0.690203	1.28535	1.02838	1.02836	2.26175	2.08798	2.20286
TraesCS7B02G100700	1.285	7.41e-58	1.245	3.3e-53	1.393	5.61e-70	9.04655	9.4392	8.75915	24.6588	24.7143	24.3369	24.9926	24.8378	24.9421	35.6377	34.5774	33.6147
TraesCS5D02G179300	3.061	7.64e-58	0.007	1	-7.462	1.27e-09	1.06199	0.948354	1.06272	9.74482	9.02074	9.71096	1.25982	1.2193	1.09734	0	0	0
TraesCS6D02G041700	2.375	8.09e-58	1.704	6.55e-28	0.612	0.0004184	0.856458	0.671834	0.823435	4.66884	4.62215	4.25135	2.82499	2.91524	3.13112	1.74548	1.74566	1.72449
TraesCS7D02G247600	-0.513	8.63e-58	-0.485	6.98e-51	-2.617	0	79.2746	80.121	81.5119	62.2203	63.4419	61.6825	66.1032	66.1784	67.0019	18.8442	18.7686	19.3792
TraesCS1B02G253500	-0.56	8.66e-58	-0.774	4.81e-101	-0.996	5.3e-164	34.1828	34.0015	34.5286	25.5206	25.7572	26.08	23.2728	23.2569	23.0201	25.1855	24.2042	25.3596
TraesCS4D02G006200	-0.577	1.09e-57	-0.126	0.0007795	-0.55	4.29e-54	53.0736	52.5324	53.3414	38.4377	40.3085	39.501	56.4334	55.5716	56.6854	51.8467	53.3893	52.2797
TraesCS1A02G335700	0.95	1.11e-57	0.601	5.78e-22	-4.145	6.99e-144	3.7205	3.72107	4.01145	8.11317	8.33377	8.11526	6.68146	6.67276	6.76619	0.337771	0.306136	0.29543
TraesCS6A02G154700	-0.964	1.27e-57	-0.537	4.16e-20	-2.989	2.99e-245	25.4008	26.2049	25.9519	14.5405	15.0251	14.5762	20.323	20.7179	20.8603	5.19714	4.43211	4.55068
TraesCS1D02G086700	-0.773	1.31e-57	-0.735	3.18e-51	-0.244	9.7e-08	28.8389	28.678	28.7208	18.6692	18.8078	18.542	20.0984	20.0413	19.8638	34.8213	34.7915	36.0717
TraesCS2B02G313900	2.507	1.65e-57	0.647	0.0008702	-0.287	0.1909	1.25975	1.15038	1.06878	7.45621	7.06487	7.43187	2.05402	2.02488	2.23025	1.32393	1.19166	1.62116
TraesCS3D02G165800	-0.825	1.77e-57	-0.933	2.02e-69	-1.892	3.2e-217	36.7961	35.1199	34.8086	22.7585	22.2606	21.8791	21.1968	21.6935	21.8343	14.4652	13.7493	13.5034
TraesCS5A02G370200	2.313	2.04e-57	1.521	5.65e-23	-0.169	0.4108	0.912359	1.02656	0.836902	5.1022	4.95815	5.24933	3.13637	3.01447	3.0755	1.14862	1.17171	1.26297
TraesCS3B02G314600	-4.134	2.33e-57	-2.791	7.07e-51	-2.82	1.64e-55	6.59084	6.9041	6.49122	0.399065	0.365937	0.498959	1.07787	1.11515	1.15229	1.29966	1.42558	1.38295
TraesCS7D02G050300	0.874	3.09e-57	0.057	0.4548	-2.082	6.28e-135	7.99039	8.30318	7.82441	16.4106	16.3117	16.3401	9.67967	9.61385	9.76384	2.69196	2.91815	2.65323
TraesCS5B02G246600	-1.203	3.17e-57	-1.434	2.66e-73	-6.031	4.18e-120	9.8809	9.70274	9.77327	4.7285	4.57352	4.85501	3.91986	4.16526	4.49768	0.236867	0.177668	0.236771
TraesCS7A02G263100	0.5	3.29e-57	0.466	1.79e-48	0.563	2.97e-74	39.3259	40.3205	40.1064	61.6619	62.4508	63.9345	63.5202	63.476	64.5337	85.3875	84.7132	86.5754
TraesCS2D02G009700	1.446	3.66e-57	1.432	3.03e-55	0.642	5.15e-11	5.79321	5.63643	6.07323	16.7749	18.028	18.1397	17.5662	18.7503	18.3698	12.8602	13.2902	13.4739
TraesCS5B02G509900	2.341	4.01e-57	2.375	1.73e-58	0.861	1.68e-07	2.57717	2.57757	2.07326	13.9037	13.327	13.4227	13.8069	13.8624	15.7572	6.29059	6.84094	5.92175
TraesCS1B02G396800	0.756	4.14e-57	-0.139	0.01819	-0.309	7.87e-09	7.94723	7.98156	8.40553	15.3753	15.169	15.0829	8.16045	8.78813	8.64599	9.39155	9.53924	9.57443
TraesCS5B02G223700	-0.68	4.28e-57	-1.091	2.95e-128	-3.181	0	43.3202	43.1175	44.397	31.3735	30.0046	29.2493	23.965	23.5189	23.6585	6.86074	6.82981	7.2372
TraesCS5B02G408300	-1.263	4.56e-57	-1.057	2.29e-41	-1.025	3.17e-41	31.4072	31.7803	32.3237	14.9287	14.3789	14.8821	16.4596	18.7162	17.9829	22.6353	20.6027	24.8506
TraesCS6B02G182800	-0.886	4.85e-57	-0.787	3.65e-45	-2.585	3.2e-265	19.2882	18.9244	20.0147	11.8523	11.3682	11.7577	12.8976	12.7243	13.466	4.77555	4.80065	4.50295
TraesCS3D02G447700	1.161	5.55e-57	1.113	2.74e-51	-0.255	0.004099	10.0876	10.0081	9.72961	24.8566	24.5933	24.5911	24.3518	25.8302	24.5273	12.1428	11.8992	12.2358
TraesCS6D02G094700	2.151	6.32e-57	3.042	1e-120	2.897	3e-110	0.89059	0.925657	0.8912	4.43638	4.47142	4.43752	8.68175	8.2335	8.90695	9.62396	9.79378	9.85212
TraesCS6A02G161600	-0.779	6.9e-57	-0.772	1.38e-54	-1.735	1.24e-208	14.0242	14.0264	14.3294	9.0863	9.27423	9.06401	9.41226	9.86732	9.45425	6.23969	6.20927	6.01995
TraesCS7D02G475900	-0.375	7.22e-57	-0.593	9.36e-132	0.087	0.0001897	59.136	60.6107	59.2523	51.1941	51.6118	50.4199	44.764	45.9868	46.6355	91.7633	91.8335	92.3213
TraesCS2A02G052500	0.58	7.32e-57	-0.256	6.99e-10	-4.723	0	28.1409	27.7852	27.2395	46.1333	46.1111	45.7424	27.4521	26.4903	26.7254	1.57123	1.54721	1.44978
TraesCS4D02G035600	1.79	8.55e-57	1.259	2.35e-26	0.019	0.9141	3.08408	2.94592	3.53698	12.0591	12.4954	12.1619	9.35659	8.61484	8.54038	4.35562	5.02621	4.68876
TraesCS4A02G419400	1.148	9e-57	2.048	1.02e-199	2.474	0	2.69523	2.70763	2.57721	6.51136	6.73191	6.38668	13.0275	12.618	12.5664	21.615	21.3999	21.3313
TraesCS5B02G214400	0.775	9.72e-57	1.186	4.25e-139	2.308	0	11.2134	10.9757	11.4407	21.1559	21.3547	21.391	29.6097	29.0139	29.9754	81.2186	78.9838	81.3785
TraesCS2B02G204200	0.978	1.06e-56	0.102	0.2105	-2.524	1.72e-124	8.36299	8.94632	8.71382	18.7005	19.0791	19.1394	10.485	10.8787	10.9708	2.13612	2.13633	2.29149
TraesCS4D02G271500	-0.936	1.16e-56	-0.645	1.09e-28	-1.234	3e-92	10.0849	10.1331	10.6758	5.78525	5.84324	6.30162	7.67904	7.50468	7.69212	6.70088	6.27829	6.0777
TraesCS3D02G134800	-0.806	1.17e-56	-0.101	0.06403	-5.644	3.39e-240	92.4732	97.2326	93.7011	60.2459	59.4943	60.1756	102.056	103.505	100.529	2.48843	2.70508	3.02816
TraesCS3A02G001700	-0.348	1.29e-56	-0.306	1.43e-43	-0.841	8.81e-299	102.072	101.729	103.935	88.9884	89.6555	89.8192	95.9054	94.3207	98.0444	83.2895	83.5795	82.4763
TraesCS3D02G354200	1.63	1.37e-56	0.047	0.787	-2.949	2.89e-42	1.93556	1.93585	1.84163	6.35766	6.60332	6.66357	2.26089	2.32911	2.24406	0.345144	0.306825	0.421671
TraesCS5B02G211400	-0.932	1.59e-56	-1.313	3.24e-96	-2.727	2.56e-246	16.7414	16.5824	17.2177	9.85441	9.76102	9.79885	7.91955	8.05017	7.59555	3.78313	3.58823	3.7084
TraesCS6D02G313000	1.566	1.59e-56	1.359	4.16e-41	-0.083	0.5354	3.72797	3.75987	3.98131	12.704	12.2878	12.7073	11.077	11.0781	11.917	5.07354	5.56631	5.07149
TraesCS7A02G068600	1.913	1.66e-56	1.328	2.85e-25	2.083	5.5e-69	1.67988	1.68013	1.90352	7.38921	7.13119	7.48587	5.16161	4.92386	5.21494	10.659	10.6302	11.0726
TraesCS5A02G545700	0.661	1.67e-56	0.248	5.51e-08	-0.722	3.54e-50	17.2665	17.2879	17.8574	30.1893	31.0055	30.7699	23.8208	23.8232	24.4627	15.1154	15.3425	15.6505
TraesCS5B02G059200	1.573	1.67e-56	1.457	2.73e-47	-1.053	1.07e-14	3.26987	3.61463	3.67395	11.4392	11.4157	12.0197	10.8796	11.2187	11.4643	2.63464	2.21886	2.52961
TraesCS5D02G143900	1.522	1.77e-56	1.572	8.61e-60	2.447	3.94e-161	3.82662	3.85884	3.57607	12.3396	11.434	12.1304	13.1136	13.0132	12.6402	30.2335	29.2426	29.6481
TraesCS2D02G423500	-1.003	1.8e-56	-0.6	2.07e-22	-7.453	1.53e-86	11.4623	11.0762	11.408	6.18578	6.26232	6.35099	8.80814	8.7259	8.40991	0.0749839	0.131235	0.0749534
TraesCS3B02G257700	0.403	1.83e-56	-0.026	0.438	-0.947	3.82e-229	145.729	145.604	146.37	215.001	213.427	214.114	167.512	162.476	167.736	110.889	111.196	107.402
TraesCS4D02G052500	0.515	1.93e-56	1.154	0	-0.468	5.66e-38	24.4275	24.4647	24.7793	39.0678	38.8727	38.9334	63.1822	63.619	63.1152	25.476	25.8023	26.0118
TraesCS7B02G327000	1.669	2.03e-56	0.7	4.33e-09	1.586	2.23e-51	2.59489	2.7734	2.57121	8.8532	9.66141	9.51416	4.93377	5.17961	4.8251	11.1918	12.0232	11.3717
TraesCS5B02G140900	-0.465	2.56e-56	-0.062	0.05702	-0.534	1.61e-74	90.065	88.8993	88.9776	71.616	70.5397	73.3605	97.4335	100.503	99.3031	89.4974	90.8943	88.0738
TraesCS7D02G211900	-0.381	2.76e-56	-0.222	8.47e-20	0.658	4.23e-200	64.025	63.4411	64.9092	54.717	54.7222	54.5089	63.1093	63.4723	64.4638	144.611	146.743	149.188
TraesCS1B02G194300	2.266	2.8e-56	2.965	1.09e-100	3.735	9.79e-168	0.994769	1.0423	1.11396	5.60848	5.74672	5.47365	9.61821	9.44149	9.44127	20.1238	20.6984	20.0584
TraesCS2B02G087600	1.114	2.81e-56	0.148	0.1004	0.24	0.002478	5.72271	6.27055	5.76572	13.7999	14.5914	14.2717	7.72222	7.82762	7.24143	9.60749	10.4583	10.3587
TraesCS3A02G191400	0.669	2.99e-56	-0.053	0.3557	-2.849	0	41.2625	40.1986	40.0058	71.647	71.1384	71.5834	46.0921	44.6289	44.903	8.17367	7.9158	8.3772
TraesCS3D02G280600	-2.324	3e-56	-2.819	1.16e-63	-3.12	4.37e-73	8.34237	8.37784	8.27966	2.06498	1.7706	1.70486	1.46535	1.20903	1.42882	1.52891	1.07448	1.5696
TraesCS2B02G599800	-1.77	3.64e-56	1.644	6.33e-92	-7.35	8.93e-40	3.63262	4.21597	3.94527	1.27178	1.296	1.27211	15.0775	14.1092	13.511	0.0299684	0.0449571	0.0299563
TraesCS1A02G081400	-0.605	3.8e-56	-0.353	2.04e-20	-0.646	8.62e-65	36.2407	35.3467	35.8265	25.7631	25.9404	26.6953	32.461	32.4407	32.4869	32.7442	33.0127	33.8176
TraesCS6B02G116200	-0.577	4e-56	-0.942	2.25e-130	-1.574	0	48.8069	49.2828	48.9705	36.4895	35.9533	36.9729	29.3255	29.3842	29.9689	23.8656	24.5283	23.2587
TraesCS2A02G542900	2.132	4.24e-56	1.835	4.44e-40	0.123	0.5072	1.19616	1.43561	1.41244	6.60521	6.60752	6.46927	5.45985	5.53729	5.71661	2.19743	2.16873	2.02312
TraesCS3D02G408100	0.934	4.48e-56	1.061	1.88e-72	0.403	1.34e-10	8.21799	8.79867	8.18067	17.5054	18.2934	17.6539	20.2546	20.3946	20.2332	16.0005	16.2355	16.1236
TraesCS3A02G398300	0.771	4.75e-56	0.834	4.03e-65	1.153	1.36e-133	26.4799	26.1873	28.1515	50.6497	50.9925	51.4347	57.0628	54.8892	54.8879	89.5586	84.9073	86.4
TraesCS7D02G263800	0.615	5.28e-56	0.583	2.28e-49	0.676	2.23e-69	22.5986	22.4031	23.2312	38.8671	38.709	38.4193	40.2	38.3494	39.8193	53.4711	50.9998	53.7378
TraesCS4D02G039100	0.554	5.33e-56	-0.45	6.5e-30	-2.448	0	55.4176	56.5087	56.3221	90.0339	91.7608	92.4443	48.6703	47.7859	46.161	15.2618	14.74	14.7326
[truncated: 68,584 more rows]

## Sheet: Table S3
Table S3. KEGG enrichment analysis of WL-induced DEGs
ID	Descrption	class	Pvalue	Qvalue	Up	Down	fg_num	bg_num
ko01110	Biosynthesis of secondary metabolites	Metabolism	1.91085e-34	2.52232e-32	494	173	667	4636
ko01100	Metabolic pathways	Metabolism	1.06536e-21	7.0314e-20	698	273	971	8130
ko00073	Cutin, suberine and wax biosynthesis	Metabolism	1.56819e-13	6.90005e-12	25	18	43	129
ko04016	MAPK signaling pathway - plant	Environmental Information Processing	1.1057e-11	3.64881e-10	57	40	97	494
ko04075	Plant hormone signal transduction	Environmental Information Processing	1.41199e-10	3.72765e-09	73	52	125	727
ko00480	Glutathione metabolism	Metabolism	2.45151e-09	5.39331e-08	67	10	77	396
ko00940	Phenylpropanoid biosynthesis	Metabolism	6.03613e-09	1.13824e-07	108	17	125	771
ko00062	Fatty acid elongation	Metabolism	3.54353e-06	5.84683e-05	32	5	37	173
ko00460	Cyanoamino acid metabolism	Metabolism	2.36506e-05	0.000346875	29	12	41	216
ko00941	Flavonoid biosynthesis	Metabolism	4.1367e-05	0.000546044	34	3	37	192
ko00999	Biosynthesis of various plant secondary metabolites	Metabolism	7.06241e-05	0.000847489	28	10	38	204
ko00944	Flavone and flavonol biosynthesis	Metabolism	0.000134997	0.00143155	8	2	10	27
ko00564	Glycerophospholipid metabolism	Metabolism	0.000140986	0.00143155	29	25	54	334
ko00591	Linoleic acid metabolism	Metabolism	0.000221192	0.00208553	5	10	15	56
ko00500	Starch and sucrose metabolism	Metabolism	0.000372961	0.00328206	48	27	75	521
ko00330	Arginine and proline metabolism	Metabolism	0.000568948	0.00469382	21	10	31	172
ko00906	Carotenoid biosynthesis	Metabolism	0.00161357	0.0120848	7	11	18	87
ko00905	Brassinosteroid biosynthesis	Metabolism	0.00168468	0.0120848	10	3	13	54
ko00908	Zeatin biosynthesis	Metabolism	0.00173948	0.0120848	18	4	22	116
ko00440	Phosphonate and phosphinate metabolism	Metabolism	0.00282007	0.0186125	0	7	7	21
ko00780	Biotin metabolism	Metabolism	0.00299377	0.018818	10	4	14	64
ko00402	Benzoxazinoid biosynthesis	Metabolism	0.00346263	0.0207758	4	5	9	33
ko00195	Photosynthesis	Metabolism	0.00444045	0.0254843	20	29	49	344
ko00942	Anthocyanin biosynthesis	Metabolism	0.00796629	0.0438146	3	0	3	5
ko00904	Diterpenoid biosynthesis	Metabolism	0.00831286	0.0438919	17	3	20	116
ko00565	Ether lipid metabolism	Metabolism	0.00938901	0.0476673	12	4	16	87
ko00270	Cysteine and methionine metabolism	Metabolism	0.0112452	0.0549767	35	16	51	379
ko00902	Monoterpenoid biosynthesis	Metabolism	0.0132124	0.0622871	5	4	9	40
ko00531	Glycosaminoglycan degradation	Metabolism	0.0182201	0.0829328	9	1	10	49
ko00380	Tryptophan metabolism	Metabolism	0.0221501	0.0974606	27	4	31	219
ko00960	Tropane, piperidine and pyridine alkaloid biosynthesis	Metabolism	0.0298064	0.126918	12	5	17	107
ko00592	alpha-Linolenic acid metabolism	Metabolism	0.0345433	0.141791	16	8	24	167
ko00071	Fatty acid degradation	Metabolism	0.0355256	0.141791	20	3	23	159
ko01040	Biosynthesis of unsaturated fatty acids	Metabolism	0.0365218	0.141791	15	4	19	126
ko01212	Fatty acid metabolism	Metabolism	0.0382163	0.14413	28	8	36	273
ko00130	Ubiquinone and other terpenoid-quinone biosynthesis	Metabolism	0.0480305	0.176112	19	4	23	164

## Sheet: Table S4
Table S4. KEGG enrichment analysis of HS-induced DEGs
ID	Descrption	class	Pvalue	Qvalue	Up	Down	fg_num	bg_num
ko01110	Biosynthesis of secondary metabolites	Metabolism	1.10975e-32	1.47597e-30	446	245	691	4636
ko01100	Metabolic pathways	Metabolism	7.84241e-18	5.2152e-16	632	369	1001	8130
ko00480	Glutathione metabolism	Metabolism	6.76238e-13	2.99799e-11	80	9	89	396
ko00073	Cutin, suberine and wax biosynthesis	Metabolism	4.45493e-12	1.48127e-10	15	27	42	129
ko00940	Phenylpropanoid biosynthesis	Metabolism	7.34895e-11	1.95482e-09	98	39	137	771
ko04016	MAPK signaling pathway - plant	Environmental Information Processing	1.11749e-09	2.4771e-08	71	24	95	494
ko04075	Plant hormone signal transduction	Environmental Information Processing	2.22236e-09	4.22248e-08	85	41	126	727
ko00592	alpha-Linolenic acid metabolism	Metabolism	7.29354e-07	1.21255e-05	29	10	39	167
ko00591	Linoleic acid metabolism	Metabolism	2.95692e-05	0.000436967	9	8	17	56
ko00908	Zeatin biosynthesis	Metabolism	3.79011e-05	0.000504084	21	6	27	116
ko00270	Cysteine and methionine metabolism	Metabolism	4.73074e-05	0.00057199	48	16	64	379
ko00904	Diterpenoid biosynthesis	Metabolism	0.000265178	0.00293905	23	2	25	116
ko00196	Photosynthesis - antenna proteins	Metabolism	0.000929203	0.00950647	0	18	18	79
ko00590	Arachidonic acid metabolism	Metabolism	0.00100356	0.00953384	10	2	12	43
ko00941	Flavonoid biosynthesis	Metabolism	0.00115253	0.0102191	28	6	34	192
ko00250	Alanine, aspartate and glutamate metabolism	Metabolism	0.00125999	0.0104737	27	4	31	171
ko00062	Fatty acid elongation	Metabolism	0.00152905	0.0119626	10	21	31	173
ko00999	Biosynthesis of various plant secondary metabolites	Metabolism	0.00173462	0.0128169	24	11	35	204
ko00500	Starch and sucrose metabolism	Metabolism	0.00261645	0.0183151	35	39	74	521
ko04712	Circadian rhythm - plant	Organismal Systems	0.0043466	0.0289049	21	4	25	140
ko00260	Glycine, serine and threonine metabolism	Metabolism	0.00469376	0.0297272	24	9	33	201
ko00430	Taurine and hypotaurine metabolism	Metabolism	0.00651602	0.0393923	12	2	14	66
ko00942	Anthocyanin biosynthesis	Metabolism	0.00929209	0.0516882	3	0	3	5
ko01040	Biosynthesis of unsaturated fatty acids	Metabolism	0.0093272	0.0516882	5	17	22	126
ko00071	Fatty acid degradation	Metabolism	0.0117465	0.0624912	18	8	26	159
ko00450	Selenocompound metabolism	Metabolism	0.0157168	0.0767011	9	3	12	59
ko00440	Phosphonate and phosphinate metabolism	Metabolism	0.0164799	0.0767011	0	6	6	21
ko00564	Glycerophospholipid metabolism	Metabolism	0.0167493	0.0767011	16	31	47	334
ko00944	Flavone and flavonol biosynthesis	Metabolism	0.0169663	0.0767011	6	1	7	27
ko00330	Arginine and proline metabolism	Metabolism	0.017301	0.0767011	23	4	27	172
ko00902	Monoterpenoid biosynthesis	Metabolism	0.0183606	0.0787731	5	4	9	40
ko00460	Cyanoamino acid metabolism	Metabolism	0.0224663	0.0933756	19	13	32	216
ko00960	Tropane, piperidine and pyridine alkaloid biosynthesis	Metabolism	0.0248662	0.100219	16	2	18	107
ko00280	Valine, leucine and isoleucine degradation	Metabolism	0.0267576	0.104669	20	1	21	131
ko01212	Fatty acid metabolism	Metabolism	0.0336948	0.12804	14	24	38	273
ko00195	Photosynthesis	Metabolism	0.0390574	0.144295	13	33	46	344
ko04626	Plant-pathogen interaction	Organismal Systems	0.0453845	0.163139	70	17	87	708

## Sheet: Table S5
Table S5. KEGG enrichment analysis of FS-induced DEGs
ID	class	Descrption	Pvalue	Qvalue	Up	Down	fg_num	bg_num
ko01100	Metabolism	Metabolic pathways	4.52812e-106	6.20353e-104	1196	1708	2904	8130
ko01110	Metabolism	Biosynthesis of secondary metabolites	3.62657e-95	2.4842e-93	815	1032	1847	4636
ko00196	Metabolism	Photosynthesis - antenna proteins	2.52659e-38	1.15381e-36	0	76	76	79
ko01200	Metabolism	Carbon metabolism	1.13909e-25	3.9014e-24	110	227	337	736
ko04016	Environmental Information Processing	MAPK signaling pathway - plant	6.64164e-22	1.81981e-20	164	74	238	494
ko00630	Metabolism	Glyoxylate and dicarboxylate metabolism	9.89799e-20	2.26004e-18	33	92	125	218
ko00710	Metabolism	Carbon fixation in photosynthetic organisms	1.79706e-18	3.51711e-17	20	101	121	214
ko00260	Metabolism	Glycine, serine and threonine metabolism	1.51102e-15	2.58763e-14	35	75	110	201
ko00500	Metabolism	Starch and sucrose metabolism	1.08121e-13	1.64584e-12	64	160	224	521
ko00860	Metabolism	Porphyrin metabolism	2.03249e-11	2.78451e-10	13	70	83	155
ko04075	Environmental Information Processing	Plant hormone signal transduction	2.68223e-11	3.3406e-10	171	114	285	727
ko00360	Metabolism	Phenylalanine metabolism	6.08845e-11	6.95098e-10	64	16	80	150
ko00280	Metabolism	Valine, leucine and isoleucine degradation	8.79945e-11	9.27327e-10	60	12	72	131
ko00480	Metabolism	Glutathione metabolism	1.21308e-10	1.18709e-09	97	73	170	396
ko00940	Metabolism	Phenylpropanoid biosynthesis	1.1768e-09	1.07481e-08	204	88	292	771
ko00195	Metabolism	Photosynthesis	1.60355e-09	1.37304e-08	8	140	148	344
ko04626	Organismal Systems	Plant-pathogen interaction	6.15621e-09	4.96118e-08	196	72	268	708
ko00030	Metabolism	Pentose phosphate pathway	1.89822e-08	1.44476e-07	18	56	74	149
ko00073	Metabolism	Cutin, suberine and wax biosynthesis	6.77098e-08	4.88223e-07	21	44	65	129
ko00592	Metabolism	alpha-Linolenic acid metabolism	9.49938e-08	6.50707e-07	46	33	79	167
ko01230	Metabolism	Biosynthesis of amino acids	1.84989e-07	1.20683e-06	102	144	246	663
ko00053	Metabolism	Ascorbate and aldarate metabolism	2.17952e-07	1.35724e-06	36	58	94	211
ko00941	Metabolism	Flavonoid biosynthesis	2.45726e-07	1.46367e-06	33	54	87	192
ko00010	Metabolism	Glycolysis / Gluconeogenesis	1.04389e-06	5.95886e-06	55	110	165	426
ko00250	Metabolism	Alanine, aspartate and glutamate metabolism	1.58931e-06	8.70944e-06	33	44	77	171
ko00350	Metabolism	Tyrosine metabolism	3.29916e-06	1.7384e-05	40	31	71	157
ko00591	Metabolism	Linoleic acid metabolism	4.87998e-06	2.47614e-05	12	20	32	56
ko00520	Metabolism	Amino sugar and nucleotide sugar metabolism	9.96057e-06	4.87356e-05	89	73	162	431
ko00906	Metabolism	Carotenoid biosynthesis	1.99713e-05	9.43474e-05	5	38	43	87
ko00130	Metabolism	Ubiquinone and other terpenoid-quinone biosynthesis	2.08982e-05	9.54353e-05	33	38	71	164
ko00410	Metabolism	beta-Alanine metabolism	2.18526e-05	9.65742e-05	33	24	57	125
ko00330	Metabolism	Arginine and proline metabolism	3.62046e-05	0.000155001	42	31	73	172
ko00380	Metabolism	Tryptophan metabolism	4.02413e-05	0.000167062	52	37	89	219
ko00071	Metabolism	Fatty acid degradation	9.6359e-05	0.00038827	45	22	67	159
ko00950	Metabolism	Isoquinoline alkaloid biosynthesis	0.00011053	0.000432648	24	16	40	84
ko00561	Metabolism	Glycerolipid metabolism	0.000147422	0.000561023	40	64	104	271
ko00650	Metabolism	Butanoate metabolism	0.000238963	0.000884809	20	18	38	81
ko00052	Metabolism	Galactose metabolism	0.000445344	0.00160558	35	39	74	187
ko00062	Metabolism	Fatty acid elongation	0.000917357	0.00322251	32	36	68	173
ko00460	Metabolism	Cyanoamino acid metabolism	0.00102073	0.00349599	24	58	82	216
ko00220	Metabolism	Arginine biosynthesis	0.00116437	0.00389069	27	14	41	95
ko00908	Metabolism	Zeatin biosynthesis	0.00141059	0.00460121	29	19	48	116
ko00620	Metabolism	Pyruvate metabolism	0.00163787	0.00521834	46	69	115	322
ko00640	Metabolism	Propanoate metabolism	0.00170972	0.00527974	28	10	38	88
ko00051	Metabolism	Fructose and mannose metabolism	0.00174745	0.00527974	29	46	75	198
ko00945	Metabolism	Stilbenoid, diarylheptanoid and gingerol biosynthesis	0.00177276	0.00527974	26	13	39	91
ko00999	Metabolism	Biosynthesis of various plant secondary metabolites	0.00273836	0.00798201	18	58	76	204
ko00670	Metabolism	One carbon pool by folate	0.00348281	0.00994051	1	21	22	46
ko00901	Metabolism	Indole alkaloid biosynthesis	0.00478012	0.0133648	13	3	16	31
ko04146	Cellular Processes	Peroxisome	0.00522284	0.0143106	55	38	93	262
ko00770	Metabolism	Pantothenate and CoA biosynthesis	0.00681309	0.0183018	28	15	43	109
ko00524	Metabolism	Neomycin, kanamycin and gentamicin biosynthesis	0.0077392	0.0200051	6	8	14	27
ko00944	Metabolism	Flavone and flavonol biosynthesis	0.0077392	0.0200051	3	11	14	27
ko00270	Metabolism	Cysteine and methionine metabolism	0.00850677	0.021582	60	68	128	379
ko00402	Metabolism	Benzoxazinoid biosynthesis	0.0102311	0.0254847	4	12	16	33
ko00904	Metabolism	Diterpenoid biosynthesis	0.0136936	0.0335004	25	19	44	116
ko00960	Metabolism	Tropane, piperidine and pyridine alkaloid biosynthesis	0.014056	0.0337837	15	26	41	107
ko00400	Metabolism	Phenylalanine, tyrosine and tryptophan biosynthesis	0.0144192	0.0340593	37	15	52	141
ko00564	Metabolism	Glycerophospholipid metabolism	0.0163633	0.0378544	39	73	112	334
ko00965	Metabolism	Betalain biosynthesis	0.0165786	0.0378544	13	5	18	40
ko00910	Metabolism	Nitrogen metabolism	0.02117	0.0475459	17	37	54	150
ko00232	Metabolism	Caffeine metabolism	0.0216672	0.0478774	5	0	5	7
ko00903	Metabolism	Limonene and pinene degradation	0.024248	0.0527297	8	3	11	22
ko00590	Metabolism	Arachidonic acid metabolism	0.03651	0.0781542	13	5	18	43
ko00900	Metabolism	Terpenoid backbone biosynthesis	0.0402458	0.0848257	33	25	58	168
ko00440	Metabolism	Phosphonate and phosphinate metabolism	0.04495	0.0933054	0	10	10	21

## Sheet: Table S6
Table S6. KEGG enrichment analysis of WL-induced upregulated DEGs
ID	class	Descrption	Pvalue	Qvalue	Up	Down	fg_num	bg_num
ko01110	Metabolism	Biosynthesis of secondary metabolites	2.06394e-33	2.68312e-31	494	0	494	4636
ko01100	Metabolism	Metabolic pathways	5.70054e-21	3.70535e-19	698	0	698	8130
ko00940	Metabolism	Phenylpropanoid biosynthesis	2.0851e-13	9.03541e-12	108	0	108	771
ko00480	Metabolism	Glutathione metabolism	2.36079e-12	7.67257e-11	67	0	67	396
ko00062	Metabolism	Fatty acid elongation	1.68146e-07	4.37179e-06	32	0	32	173
ko00941	Metabolism	Flavonoid biosynthesis	2.07411e-07	4.49391e-06	34	0	34	192
ko00073	Metabolism	Cutin, suberine and wax biosynthesis	1.52078e-06	2.8243e-05	25	0	25	129
ko04016	Environmental Information Processing	MAPK signaling pathway - plant	5.28411e-05	0.000858668	57	0	57	494
ko00999	Metabolism	Biosynthesis of various plant secondary metabolites	0.000275604	0.00373204	28	0	28	204
ko00944	Metabolism	Flavone and flavonol biosynthesis	0.000299074	0.00373204	8	0	8	27
ko00460	Metabolism	Cyanoamino acid metabolism	0.000315788	0.00373204	29	0	29	216
ko04075	Environmental Information Processing	Plant hormone signal transduction	0.000432859	0.0046893	73	0	73	727
ko00908	Metabolism	Zeatin biosynthesis	0.000778575	0.00778575	18	0	18	116
ko00380	Metabolism	Tryptophan metabolism	0.00183137	0.0170055	27	0	27	219
ko00904	Metabolism	Diterpenoid biosynthesis	0.00203935	0.0176744	17	0	17	116
ko00942	Metabolism	Anthocyanin biosynthesis	0.00278978	0.022667	3	0	3	5
ko00905	Metabolism	Brassinosteroid biosynthesis	0.0030195	0.0230903	10	0	10	54
ko00531	Metabolism	Glycosaminoglycan degradation	0.00508158	0.0367003	9	0	9	49
ko00071	Metabolism	Fatty acid degradation	0.0053821	0.0368249	20	0	20	159
ko00330	Metabolism	Arginine and proline metabolism	0.00622615	0.0396572	21	0	21	172
ko04712	Organismal Systems	Circadian rhythm - plant	0.00640616	0.0396572	18	0	18	140
ko00280	Metabolism	Valine, leucine and isoleucine degradation	0.00722921	0.0427181	17	0	17	131
ko00780	Metabolism	Biotin metabolism	0.0103865	0.058706	10	0	10	64
ko00430	Metabolism	Taurine and hypotaurine metabolism	0.0128138	0.0694083	10	0	10	66
ko00565	Metabolism	Ether lipid metabolism	0.013993	0.0727635	12	0	12	87
ko00130	Metabolism	Ubiquinone and other terpenoid-quinone biosynthesis	0.0152033	0.0760167	19	0	19	164
ko00500	Metabolism	Starch and sucrose metabolism	0.0182053	0.0856515	48	0	48	521
ko01212	Metabolism	Fatty acid metabolism	0.018448	0.0856515	28	0	28	273
ko04626	Organismal Systems	Plant-pathogen interaction	0.0218048	0.0977457	62	0	62	708
ko01040	Metabolism	Biosynthesis of unsaturated fatty acids	0.0231699	0.100403	15	0	15	126
ko00360	Metabolism	Phenylalanine metabolism	0.0252781	0.106005	17	0	17	150
ko00053	Metabolism	Ascorbate and aldarate metabolism	0.0287998	0.114475	22	0	22	211
ko00400	Metabolism	Phenylalanine, tyrosine and tryptophan biosynthesis	0.0290591	0.114475	16	0	16	141
ko00770	Metabolism	Pantothenate and CoA biosynthesis	0.0325589	0.12449	13	0	13	109
ko00270	Metabolism	Cysteine and methionine metabolism	0.0381045	0.141531	35	0	35	379
ko00250	Metabolism	Alanine, aspartate and glutamate metabolism	0.0413678	0.149384	18	0	18	171

## Sheet: Table S7
Table S7. KEGG enrichment analysis of WL-induced downregulated DEGs
ID	class	Descrption	Pvalue	Qvalue	Up	Down	fg_num	bg_num
ko04075	Environmental Information Processing	Plant hormone signal transduction	4.51577e-09	5.10282e-07	0	52	52	727
ko04016	Environmental Information Processing	MAPK signaling pathway - plant	1.06439e-08	6.01381e-07	0	40	40	494
ko00073	Metabolism	Cutin, suberine and wax biosynthesis	5.34028e-08	2.01151e-06	0	18	18	129
ko00195	Metabolism	Photosynthesis	5.19803e-07	1.46844e-05	0	29	29	344
ko00440	Metabolism	Phosphonate and phosphinate metabolism	1.63516e-06	3.69546e-05	0	7	7	21
ko00591	Metabolism	Linoleic acid metabolism	5.31307e-06	0.000100063	0	10	10	56
ko00564	Metabolism	Glycerophospholipid metabolism	2.496e-05	0.000402926	0	25	25	334
ko00906	Metabolism	Carotenoid biosynthesis	5.41241e-05	0.000764503	0	11	11	87
ko01110	Metabolism	Biosynthesis of secondary metabolites	0.000306009	0.00384212	0	173	173	4636
ko00402	Metabolism	Benzoxazinoid biosynthesis	0.00276154	0.0285815	0	5	5	33
ko01100	Metabolism	Metabolic pathways	0.00278227	0.0285815	0	273	273	8130
ko00500	Metabolism	Starch and sucrose metabolism	0.00398803	0.0357187	0	27	27	521
ko00052	Metabolism	Galactose metabolism	0.00410923	0.0357187	0	13	13	187
ko00460	Metabolism	Cyanoamino acid metabolism	0.0290995	0.224909	0	12	12	216
ko00902	Metabolism	Monoterpenoid biosynthesis	0.0307257	0.224909	0	4	4	40
ko00561	Metabolism	Glycerolipid metabolism	0.0333642	0.224909	0	14	14	271
ko00330	Metabolism	Arginine and proline metabolism	0.0338359	0.224909	0	10	10	172
ko00300	Metabolism	Lysine biosynthesis	0.0446527	0.28032	0	4	4	45

## Sheet: Table S8
Table S8. KEGG enrichment analysis of HS-induced upregulated DEGs
ID	class	Descrption	Pvalue	Qvalue	Up	Down	fg_num	bg_num
ko01110	Metabolism	Biosynthesis of secondary metabolites	9.80804e-20	1.226e-17	446	0	446	4636
ko00480	Metabolism	Glutathione metabolism	2.57363e-19	1.60852e-17	80	0	80	396
ko00940	Metabolism	Phenylpropanoid biosynthesis	5.33877e-10	2.22449e-08	98	0	98	771
ko04016	Environmental Information Processing	MAPK signaling pathway - plant	8.40336e-10	2.62605e-08	71	0	71	494
ko01100	Metabolism	Metabolic pathways	4.23637e-08	1.05909e-06	632	0	632	8130
ko04075	Environmental Information Processing	Plant hormone signal transduction	3.43394e-07	7.15404e-06	85	0	85	727
ko00592	Metabolism	alpha-Linolenic acid metabolism	2.1212e-06	3.67938e-05	29	0	29	167
ko00904	Metabolism	Diterpenoid biosynthesis	2.3548e-06	3.67938e-05	23	0	23	116
ko00270	Metabolism	Cysteine and methionine metabolism	1.67313e-05	0.000232379	48	0	48	379
ko00908	Metabolism	Zeatin biosynthesis	2.75238e-05	0.000321784	21	0	21	116
ko00250	Metabolism	Alanine, aspartate and glutamate metabolism	2.8317e-05	0.000321784	27	0	27	171
ko00941	Metabolism	Flavonoid biosynthesis	8.68799e-05	0.000904999	28	0	28	192
ko04712	Organismal Systems	Circadian rhythm - plant	0.000434066	0.00388592	21	0	21	140
ko00590	Metabolism	Arachidonic acid metabolism	0.000452017	0.00388592	10	0	10	43
ko00280	Metabolism	Valine, leucine and isoleucine degradation	0.00046631	0.00388592	20	0	20	131
ko04626	Organismal Systems	Plant-pathogen interaction	0.000723988	0.00565616	70	0	70	708
ko00330	Metabolism	Arginine and proline metabolism	0.00122348	0.00899615	23	0	23	172
ko00430	Metabolism	Taurine and hypotaurine metabolism	0.0013475	0.00935767	12	0	12	66
ko00960	Metabolism	Tropane, piperidine and pyridine alkaloid biosynthesis	0.00206893	0.0136114	16	0	16	107
ko00942	Metabolism	Anthocyanin biosynthesis	0.00273792	0.017112	3	0	3	5
ko00260	Metabolism	Glycine, serine and threonine metabolism	0.00443255	0.0263842	24	0	24	201
ko00999	Metabolism	Biosynthesis of various plant secondary metabolites	0.00533902	0.0303353	24	0	24	204
ko00360	Metabolism	Phenylalanine metabolism	0.00569334	0.030942	19	0	19	150
ko00944	Metabolism	Flavone and flavonol biosynthesis	0.00795909	0.0414536	6	0	6	27
ko04146	Cellular Processes	Peroxisome	0.0102438	0.0512191	28	0	28	262
ko00591	Metabolism	Linoleic acid metabolism	0.0118103	0.0567801	9	0	9	56
ko00450	Metabolism	Selenocompound metabolism	0.0163814	0.0758397	9	0	9	59
ko00290	Metabolism	Valine, leucine and isoleucine biosynthesis	0.0175842	0.0785009	8	0	8	50
ko00410	Metabolism	beta-Alanine metabolism	0.0206237	0.0839055	15	0	15	125
ko00071	Metabolism	Fatty acid degradation	0.0207736	0.0839055	18	0	18	159
ko00909	Metabolism	Sesquiterpenoid and triterpenoid biosynthesis	0.0208086	0.0839055	7	0	7	42
ko00073	Metabolism	Cutin, suberine and wax biosynthesis	0.0265879	0.103859	15	0	15	129
ko00910	Metabolism	Nitrogen metabolism	0.045035	0.170587	16	0	16	150

## Sheet: Table S9
Table S9. KEGG enrichment analysis of HS-induced downregulated DEGs
ID	class	Descrption	Pvalue	Qvalue	Up	Down	fg_num	bg_num
ko00073	Metabolism	Cutin, suberine and wax biosynthesis	7.30229e-14	8.68973e-12	0	27	27	129
ko01110	Metabolism	Biosynthesis of secondary metabolites	4.23011e-13	2.51692e-11	0	245	245	4636
ko01100	Metabolism	Metabolic pathways	1.05333e-11	4.17819e-10	0	369	369	8130
ko00196	Metabolism	Photosynthesis - antenna proteins	2.49394e-10	7.41947e-09	0	18	18	79
ko00195	Metabolism	Photosynthesis	2.62552e-07	6.24873e-06	0	33	33	344
ko00062	Metabolism	Fatty acid elongation	9.85663e-07	1.9549e-05	0	21	21	173
ko00564	Metabolism	Glycerophospholipid metabolism	1.23443e-06	2.09853e-05	0	31	31	334
ko01040	Metabolism	Biosynthesis of unsaturated fatty acids	2.4665e-06	3.66892e-05	0	17	17	126
ko00500	Metabolism	Starch and sucrose metabolism	1.10941e-05	0.000146688	0	39	39	521
ko01212	Metabolism	Fatty acid metabolism	4.73201e-05	0.000563109	0	24	24	273
ko00440	Metabolism	Phosphonate and phosphinate metabolism	6.94328e-05	0.000751136	0	6	6	21
ko00591	Metabolism	Linoleic acid metabolism	0.000790809	0.00784219	0	8	8	56
ko04075	Environmental Information Processing	Plant hormone signal transduction	0.00263286	0.0241008	0	41	41	727
ko00940	Metabolism	Phenylpropanoid biosynthesis	0.0182347	0.154995	0	39	39	771
ko00670	Metabolism	One carbon pool by folate	0.023469	0.186187	0	5	5	46
ko00561	Metabolism	Glycerolipid metabolism	0.0344563	0.240696	0	16	16	271
ko00906	Metabolism	Carotenoid biosynthesis	0.0359053	0.240696	0	7	7	87
ko00052	Metabolism	Galactose metabolism	0.0364078	0.240696	0	12	12	187
ko00460	Metabolism	Cyanoamino acid metabolism	0.0467284	0.292667	0	13	13	216

## Sheet: Table S10
	Table S10. KEGG enrichment analysis of FS-induced upregulated DEGs
ID	class	Descrption	Pvalue	Qvalue	Up	Down	fg_num	bg_num
ko01110	Metabolism	Biosynthesis of secondary metabolites	1.23387e-38	1.61637e-36	815	0	815	4636
ko04016	Environmental Information Processing	MAPK signaling pathway - plant	1.12001e-35	7.33607e-34	164	0	164	494
ko04626	Organismal Systems	Plant-pathogen interaction	2.29793e-30	1.00343e-28	196	0	196	708
ko00940	Metabolism	Phenylpropanoid biosynthesis	1.01772e-28	3.33302e-27	204	0	204	771
ko01100	Metabolism	Metabolic pathways	7.84654e-24	2.05579e-22	1196	0	1196	8130
ko00280	Metabolism	Valine, leucine and isoleucine degradation	1.06663e-21	2.32882e-20	60	0	60	131
ko00360	Metabolism	Phenylalanine metabolism	5.08825e-21	9.52231e-20	64	0	64	150
ko04075	Environmental Information Processing	Plant hormone signal transduction	2.3562e-18	3.85828e-17	171	0	171	727
ko00480	Metabolism	Glutathione metabolism	5.81374e-12	8.46222e-11	97	0	97	396
ko00071	Metabolism	Fatty acid degradation	3.14634e-08	4.1217e-07	45	0	45	159
ko00592	Metabolism	alpha-Linolenic acid metabolism	5.48558e-08	6.53283e-07	46	0	46	167
ko00520	Metabolism	Amino sugar and nucleotide sugar metabolism	2.9196e-07	3.18723e-06	89	0	89	431
ko00640	Metabolism	Propanoate metabolism	9.52023e-07	9.59346e-06	28	0	28	88
ko00380	Metabolism	Tryptophan metabolism	1.31594e-06	1.23134e-05	52	0	52	219
ko00350	Metabolism	Tyrosine metabolism	3.43845e-06	3.00292e-05	40	0	40	157
ko00400	Metabolism	Phenylalanine, tyrosine and tryptophan biosynthesis	3.76186e-06	3.08003e-05	37	0	37	141
ko00330	Metabolism	Arginine and proline metabolism	6.33494e-06	4.88163e-05	42	0	42	172
ko00410	Metabolism	beta-Alanine metabolism	1.07507e-05	7.82408e-05	33	0	33	125
ko00220	Metabolism	Arginine biosynthesis	1.57838e-05	0.000108825	27	0	27	95
ko00945	Metabolism	Stilbenoid, diarylheptanoid and gingerol biosynthesis	2.03396e-05	0.000133224	26	0	26	91
ko00901	Metabolism	Indole alkaloid biosynthesis	3.03753e-05	0.000189484	13	0	13	31
ko04146	Cellular Processes	Peroxisome	3.23996e-05	0.000192925	55	0	55	262
ko00950	Metabolism	Isoquinoline alkaloid biosynthesis	4.17947e-05	0.000238048	24	0	24	84
ko00770	Metabolism	Pantothenate and CoA biosynthesis	8.22547e-05	0.000448973	28	0	28	109
ko00908	Metabolism	Zeatin biosynthesis	0.000104671	0.000548479	29	0	29	116
ko00600	Metabolism	Sphingolipid metabolism	0.000140103	0.000705904	26	0	26	101
ko00232	Metabolism	Caffeine metabolism	0.000451406	0.00219015	5	0	5	7
ko00965	Metabolism	Betalain biosynthesis	0.000617039	0.00288686	13	0	13	40
ko00590	Metabolism	Arachidonic acid metabolism	0.00132213	0.00597238	13	0	13	43
ko00650	Metabolism	Butanoate metabolism	0.00138455	0.00604589	20	0	20	81
ko00310	Metabolism	Lysine degradation	0.00178401	0.00753886	24	0	24	106
ko01210	Metabolism	2-Oxocarboxylic acid metabolism	0.00199271	0.00815764	35	0	35	175
ko00130	Metabolism	Ubiquinone and other terpenoid-quinone biosynthesis	0.00237713	0.00943647	33	0	33	164
ko00904	Metabolism	Diterpenoid biosynthesis	0.00296454	0.0114222	25	0	25	116
ko00903	Metabolism	Limonene and pinene degradation	0.00313498	0.0117338	8	0	8	22
ko00900	Metabolism	Terpenoid backbone biosynthesis	0.00354304	0.0128927	33	0	33	168
ko00250	Metabolism	Alanine, aspartate and glutamate metabolism	0.00470907	0.0166727	33	0	33	171
ko00052	Metabolism	Galactose metabolism	0.00608719	0.0209848	35	0	35	187
ko01230	Metabolism	Biosynthesis of amino acids	0.00702122	0.0235841	102	0	102	663
ko00062	Metabolism	Fatty acid elongation	0.0100272	0.0328392	32	0	32	173
ko01200	Metabolism	Carbon metabolism	0.0123106	0.0393339	110	0	110	736
ko00290	Metabolism	Valine, leucine and isoleucine biosynthesis	0.0148897	0.0464417	12	0	12	50
ko00100	Metabolism	Steroid biosynthesis	0.0170164	0.0518407	27	0	27	146
ko00603	Metabolism	Glycosphingolipid biosynthesis - globo and isoglobo series	0.0177237	0.0526414	9	0	9	34
ko00260	Metabolism	Glycine, serine and threonine metabolism	0.0180829	0.0526414	35	0	35	201
ko00270	Metabolism	Cysteine and methionine metabolism	0.019384	0.0552023	60	0	60	379
ko00053	Metabolism	Ascorbate and aldarate metabolism	0.0223261	0.0622282	36	0	36	211
ko00941	Metabolism	Flavonoid biosynthesis	0.025217	0.0688215	33	0	33	192
ko00591	Metabolism	Linoleic acid metabolism	0.0346657	0.0926777	12	0	12	56
ko02010	Environmental Information Processing	ABC transporters	0.0498319	0.13056	20	0	20	112

[truncated: 13 more sheets: Table S11, Table S12, Table S13, Table S14, Table S15, Table S16, Table S17, Table S18, Table S19, Table S20, Table S21, Table S22, Table S23]
